# Supplementary material for: Physiological changes during torpor favor association with Endozoicomonas endosymbionts in the urochordate Botrylloides leachii
Source: Front Microbiol. 2023 May 31;14:1072053. doi: 10.3389/fmicb.2023.1072053 (PMC10264598; doi:10.3389/fmicb.2023.1072053)
Supplement: Supplementary file 1 [file Table_1.XLSX]

## Sheet: Supplementary Table 1
S.Table 1			hibernation= blue
red color= low number of expression read			mid torpor= green
yellow = high number of expression read			active = light blue
green= very high number of expression read
Geneid	Contig	Gene	length (bp)	hibernation colony 1	hibernation colony 2	hibernation colony 3	mid torpor zooid 1	mid torpor zooid2	mid torpor zooid 31	mid torpor vasculature 1	mid torpor vasculature 2	mid torpor vasculature 31	active vasculature 1	active vasculature 2	active vasculature 3	active zooid 1	active zooid 1	active zooid 3	SUM	SEED function	nucleotide_sequence	amino acid_sequence
1	MAG14_1	MAG14_1_1	134	260	235	571	306	131	1143	221	568	182	6	0	0	15	146	0	3833	hypothetical protein	atgcttgacaatataagccgtgcaggtattatggacggccttgctgaagagaagttaagttctgcttcagccggttcaaaagcgattgaaccgagttctttaacaagatatcagataattcgtgtgggcgcttga	MLDNISRAGIMDGLAEEKLSSASAGSKAIEPSSLTRYQIIRVGA
2	MAG14_1	MAG14_1_2	800	8	0	19	2	8	19	6	23	22	0	0	0	0	3	2	112	Glucosamine-6-phosphate deaminase (EC 3.5.99.6)	atgcgactgattcctgtgagcaccaatgccgatgttggcaagtgggctgcccgatatattgccgataaaattaataaggccaatcctacgcaagataagccttttgtgctaggtttaccaacgggaagtacaccgctgtcgacgtataatgaattgattgccttaaataaagcgaaagaggtcagcttccagcacgtcgtgacttttaatatggatgaatatgttggtatacctgctgaccatcatcagtcctatcgcagttttatgtttaaaaattttttcgaacatattgatattcggattgataatatcaatatgctcgatggtaatgcaccagacctagtgcttgagtgcaatagatatgaagagaaaatgaaaaatgtaggtggtgttgattta…	MRLIPVSTNADVGKWAARYIADKINKANPTQDKPFVLGLPTGSTPLSTYNELIALNKAKEVSFQHVVTFNMDEYVGIPADHHQSYRSFMFKNFFEHIDIRIDNINMLDGNAPDLVLECNRYEEKMKNVGGVDLFLGGVGHDGHIAFNEPGSSLSSRTRIKTLTDKTRRANSRFFENVIEQVPKHSLTIGVGTLLDAKEVMILITGADKALALKAVVEGPVNHLWTVSALQMHPKAIIVCDEDATMELRVKTLKYFCELEQTSSYQL
3	MAG14_1	MAG14_1_3	1229	12	14	29	8	20	36	32	80	10	0	0	0	0	19	0	260	D-3-phosphoglycerate dehydrogenase (EC 1.1.1.95)	atgcctgcaatatcgttagataaaacgaagatatcttttctgttgttagaaggtgttcacccatcggccgtagaggttctaaaagctgctggctacactaatattgactatgtggaccagtctatttcaaatgatgaactgaaagcacgcattgcacaggttcagttcgttggggtgcgctctcgaacacagctaaccggtgaaatttttgatgcagcaaaaaaactgattgctgtgggttgcttttgcattggtactaatcaagtcgatctccatgccgctactcgctgtggtattcccgtatttaatgccccctattcaaatacgcgctcagtggctgagttggttttggctgaagctattatgttattacgcggtatccctgaaaaaaatgctttg…	MPAISLDKTKISFLLLEGVHPSAVEVLKAAGYTNIDYVDQSISNDELKARIAQVQFVGVRSRTQLTGEIFDAAKKLIAVGCFCIGTNQVDLHAATRCGIPVFNAPYSNTRSVAELVLAEAIMLLRGIPEKNALAHRGDWKKSAARSYEIRGKKLGIIGYGNIGSQLSILAESLGMDVYFYDVATRLSMGNATQVNNLSQLLSLSDVVSLHVPETDETQCMIGAEQLACMKKDAVLINASRGTVVDLAALADYLSKNKLLGAALDVFPEEPRANTEAFISPLQHFDNVILTPHIGGSTQEAQQNIGREVAEKFILYSDNGNTMSAVNFPEVVLPAYPGKHRLLHVHQNIPGVLGAVNQVFSKNNINISAQYLQTNESLGYVVIDVDVAQSDIALEKLRMI…
4	MAG14_1	MAG14_1_4	1412	16	16	48	6	10	17	16	30	18	2	0	0	0	4	0	183	hypothetical protein	atgaaaaataaaattaaaatacatccatttaagagaactgcaatcagtgctgctattgctgtagctttaacttgttcttttagcaatgtaatggctgacgattcggagtctggaacggaaggtcagactgatcctgctcgtggttattttcaacgagttacttcatggttcttcggtaatgcggatgaagagatcttcggtggtatggatgatatggatggtatacttggagaaggatatgatgaggactccgatgatacaggttctaatcaatcgcttggagggccggagggtatcttagctgaggaagatcgccttgctgaagctgaagagaccacgccaaagggcgcatttttagaacccataactgaagatgaagctagagagaccttggaaagg…	MKNKIKIHPFKRTAISAAIAVALTCSFSNVMADDSESGTEGQTDPARGYFQRVTSWFFGNADEEIFGGMDDMDGILGEGYDEDSDDTGSNQSLGGPEGILAEEDRLAEAEETTPKGAFLEPITEDEARETLEREALIADTAEEENAAEEENVTEEELIRGFNTVSASCASLARATMQGSADLTRSIFTQTTNRGYTSNQGVSTGDTVEAGGFWLNYLNSTGKQSQEPGLDAYSNKLNGVVVGVESELTPDVKVGVAFTTAKSHVDVKSELKPSVNSDFYALAIYGNCTDGNWFMNSAFSYGLGDHQYKIDDDKAKNKTTTFGFTLGGGYNYALNNQWSVQPNTQFNLINVKGDAVKVEDYKIRANDLRVAELGAGISLVGEIPMDKSTLTTEVGLKHFH…
5	MAG14_1	MAG14_1_5	122	0	0	0	0	0	0	0	0	0	0	0	0	0	0	0	0	hypothetical protein	atgacgttaattaatagaataaattttattgttaaaaaattaattactttaaaattaaatggttatgctatccaacttatttttattccatgctatctatttttcgaattaatttttatttga	MTLINRINFIVKKLITLKLNGYAIQLIFIPCYLFFELIFI
6	MAG14_1	MAG14_1_6	413	0	0	2	2	0	9	18	12	7	0	0	0	1	0	0	51	hypothetical protein	atgaatattcatcccgttgcctatgagccagcatcagattttattccaggccctcaaggtgaactcgttctcaaagtaatggccgaccatagctcgcttaacagtaaaggcgatgtatttggcggctgggttgcgttaaatcttgatcaggccggcgagattgaagcccgaaaagtggctaatgttcaacgggttgctgtagtcagtattggggcaatgagttttctacacccagttaaaatgggcgatgttattgcattttatagtaagcctaaggagatagggcgtacttctataacggttgaagtagaggcctgggttgaaggtgaatccagctcagtaaagctaacagaagcaagtttggtttttgttgctatggatgatcagggcagaactcgc…	MNIHPVAYEPASDFIPGPQGELVLKVMADHSSLNSKGDVFGGWVALNLDQAGEIEARKVANVQRVAVVSIGAMSFLHPVKMGDVIAFYSKPKEIGRTSITVEVEAWVEGESSSVKLTEASLVFVAMDDQGRTRRITQ
7	MAG14_1	MAG14_1_7	185	0	0	0	0	0	0	0	3	2	0	0	0	0	0	0	9	hypothetical protein	ttgcaggcaaagaaaagggttttaaagcgtaagcggtataaagcgctttattacaagccttgcttaatatacacgcatatgctcatgccaattttgcatgcttgccggtgtgctgacaatacggataaacgttatgaccgctcatggcgctatttttgttttttgtgcgtcatgcttacacaataa	MQAKKRVLKRKRYKALYYKPCLIYTHMLMPILHACRCADNTDKRYDRSWRYFCFLCVMLTQ
8	MAG14_1	MAG14_1_8	941	0	0	0	0	2	0	0	0	0	0	0	0	2	0	0	4	hypothetical protein	atgtttaatcgatatgcattactatatttaccattgatttttttttgctctttcgcattctctcatcttcagtttgtcgaatcacatacattataccctgataaaaaagcactctgtgtcataactaatgagcaagggcaaattctattgggagaatataatgtagaaaataatgatgtttctattttatacccagatgggagcctacgttccactacagaaaatttcttttggttacaagcagatgcccaatcaataaaacaatacactcaaaatgaaaaatataaatcaaaggataacgcaactattcatgagctattttttttaaattcagtgaatcttactgaaagcatgaaatcttgcattgaagaaaaagaagcaagctataagcctctctat…	MFNRYALLYLPLIFFCSFAFSHLQFVESHTLYPDKKALCVITNEQGQILLGEYNVENNDVSILYPDGSLRSTTENFFWLQADAQSIKQYTQNEKYKSKDNATIHELFFLNSVNLTESMKSCIEEKEASYKPLYSISIDEKTTLNKEMVITIKSLNNNSDDKETQMNELSFHFELDNKDQEVTLDNDTKIYLEHVKNYKQKDTYTAYKTGDYTIIDTNISGWTTEKSHTDIPKGISSRHIGNGFCFRLSLPTISDQEFIEYIRRNNNLIDQLKNNFYIFFDGIHYTIGKTFNPTDTANGKNRMFLILPTDDSAK
9	MAG14_1	MAG14_1_9	215	2	0	3	1	0	1	0	2	0	0	0	0	0	1	0	10	Mobile element protein	ttgaaagtattttatcaaaaaaacagcttccttttaagttatgcaacagcccctgaaaggaaaaaccttacatttcgaacacgtattaagcgtttagtcaggcggacgatttgcttttcaaagtcattggcgagtttatatcaagagagttctaacaactttaacattcaagctgggcgtgagcctatgcagtttgcgcctatgctctcaatttaa	MKVFYQKNSFLLSYATAPERKNLTFRTRIKRLVRRTICFSKSLASLYQESSNNFNIQAGREPMQFAPMLSI
10	MAG14_10	MAG14_10_10	1793	28	10	50	10	25	29	24	26	19	0	0	0	0	7	0	228	Desferrioxamine E biosynthesis protein DesD @ Siderophore synthetase superfamily, group C @ Siderophore synthetase component, ligase	atgcatagatcaacccataaacaatctattaaccacttaacccctgaagcatgggctaaggcaaacagtcaaatgataaataaaatgcttagtcagtttgcccatgaacgcttattatttcctgagatcataggccatcatgaagcttggactgaatatgagctaaaaaccggcaacgccctctgttatcgattcaatgcacgcattcttatgttggatcactggtggattgacacaaaaaccctacgaaaattaaataatggacaacagtaccctctggatgccatggcatttattacagaatttagcgatatcctagggttatctccagagatactaccgagctaccttgaggaaatcactaatacgctttacagcagtgcttacaaactaacacac…	MHRSTHKQSINHLTPEAWAKANSQMINKMLSQFAHERLLFPEIIGHHEAWTEYELKTGNALCYRFNARILMLDHWWIDTKTLRKLNNGQQYPLDAMAFITEFSDILGLSPEILPSYLEEITNTLYSSAYKLTHAKLSSKQLVSSHYQAIEAAMTEGHPSFAANNARIGFTAEDYRQYTPETGMNFHLIWVAARKDKTIFSTVDNLSYEQLITEELSAESRCQFTELIHKKGLDSKDYLFIPVHPWQWNNKIVYMYAADIAASDLIYLGESEDNYQPQQSIRTFFNNDHPHKRYVKTALSIRNMGFVRGLSPYYMEGTPSINQWVASTIEKDPFLASVGFQALQEVAAVGFANKRFESATHSTSPYRKMLSSLWRESPINKIKPNQQLMTMAALLHVDAH…
11	MAG14_10	MAG14_10_11	596	2	0	5	0	3	4	4	0	1	0	0	0	0	2	0	21	hypothetical protein	atgtattcattagatagcaataactttgaacaaaccctcaagatacagggagagaccttgggaattttttattttaggcctatggatctaaccaaggatatcttgatgattcatagctgggttacacaaccctatgcaaaattttggggattacaaaatgaaactaaaaccacagtaaaaagtacatatcaacgtattatacagtcatgcgacgtttatattggctattcgaaaaaagggcctatcttactattagaggtttataaccccgccaatgaagcagtgggtaaacattaccccgttcgtgctgatgatgctggcatgcacctcctaatggcgccgccaaagcagcgtaaatctgggtatacctggcaaatatttaagttcgtaatggacttc…	MYSLDSNNFEQTLKIQGETLGIFYFRPMDLTKDILMIHSWVTQPYAKFWGLQNETKTTVKSTYQRIIQSCDVYIGYSKKGPILLLEVYNPANEAVGKHYPVRADDAGMHLLMAPPKQRKSGYTWQIFKFVMDFLFSSTKINRIVVEPDSQNYKIHALNQRAGFLVEKQIRLPEKSALLCFCTRNDYYQNISATRCNAI
12	MAG14_10	MAG14_10_12	1199	2	4	14	4	9	8	9	12	9	0	0	0	0	4	0	75	hypothetical protein	atgcaggataagcttcattattatttgattactattacactgtttgctgttatcagcgacaccatgttgcaacctttttatcccatattcttcaaagaagtttttcatattaccaacccaaattatgttggtatttatttagctgcgatgataatggtcgtcatgttggcatttcctttttgggctcgtttagcgaaagggataagcacattaaccttgttgatttatacacaactcatagcaggttttctcagcattctctgctatttcagcaccagtgctgaagcgttctggttaatttccctcaccatggtgatgtttaaggcaagttatctcttagtatatccatatatgatgagcttagaggattcatcgagacactcccatattgtcggcata…	MQDKLHYYLITITLFAVISDTMLQPFYPIFFKEVFHITNPNYVGIYLAAMIMVVMLAFPFWARLAKGISTLTLLIYTQLIAGFLSILCYFSTSAEAFWLISLTMVMFKASYLLVYPYMMSLEDSSRHSHIVGILTVIVHFGAIGGASAGGFFLGLIEPKKIFLLMSMSDFLQMIICFYIRKKQSSQSIADAEKASEKKDLPLLDENKNIPSRILIYPLAIVMLVFYFSAQITRPFFSIYWETVSGLNSSLIAGFAYAIPAWAALLALWQNRYLSDNNPLLRIAPCLLLGLCGLLIQSGEQTAMIIIGRCLYGWALFQVTVKLDMELYNLSTPERYATDFSKIYMFQSLGSLLASLCAGLLVSTISNLAASLLVASAGWVITLVLFTILHKQKEALATPL
13	MAG14_10	MAG14_10_13	1322	1	2	28	9	13	16	12	22	6	0	0	0	2	1	0	112	Siderophore biosynthesis protein, monooxygenase	atgtctatacgaccatacgatgttattggtgtaggtcttggtccttttaatttaagccttgcctgcctaattgaacctattaaatcattaaatactattttttttgataaaaacccagagtttaactggcacccaggcataatgattgaaggcagtcaccttcaaaccccttttatgtcagatctagtcacactcgctgacccgaccagcccttatagtttcttgaatttccttaaaaagcaaggtcgtttatatcctttttatattcgggagaacttttttatattacgcgaggaatacaacaagtactgccaatgggcaacaacaaaactcaataatatccagttcaatagtgaagtgatggccattgataaaaaccggcaacatgacatctataaa…	MSIRPYDVIGVGLGPFNLSLACLIEPIKSLNTIFFDKNPEFNWHPGIMIEGSHLQTPFMSDLVTLADPTSPYSFLNFLKKQGRLYPFYIRENFFILREEYNKYCQWATTKLNNIQFNSEVMAIDKNRQHDIYKVTVKDPNTKKCTYYFAKRLVIGTGPVPSLPSCCDDSALIKQHSSRYLTNKPVLQQQSSITVLGSGQSAAEIFYDLLQDIDHYNYTLSWITRSPRYFPLEYTKLTLEMTSPEYVDYFYDLPKNKRQQLIKEQKNLYKGINSELINLIYDLLYTKSLNTDIDVNLHTNATLHNISPFSNEKGFTLGLRNKESQEAYCHTTEGLIFATGYQYKIPQFLNNISNDIRWDDQQGTFNAHRNYTIDHQQSRIFVQNAEFNTHGFVTPDLGMA…
14	MAG14_10	MAG14_10_14	896	2	2	18	17	16	2	17	9	4	0	0	0	0	2	0	89	Siderophore biosynthesis L-2,4-diaminobutyrate decarboxylase	ttcagtatccaaaaagcagccagtattcttggattaggctctaactcagtcgttaccgtaccctgtgatgctcgctattgtattaaccctgatacattactgtcattgatagaaaaaaacatcgcattagataatattccgatggctgtcatcgccacagccggtacaacagactttggcagtatagaccctatattacctattgctgatatatgcgaacgatacaatatatggttacatgttgatgctgcctatggtggtggcctattactatcaaaaaaacatcgcttattattatcaggtattgaaaaagctgactctatcacagttgatttccataaatctttttttcagcccgtgagttgcagcacttttttattgcagaataaaacgcacttc…	FSIQKAASILGLGSNSVVTVPCDARYCINPDTLLSLIEKNIALDNIPMAVIATAGTTDFGSIDPILPIADICERYNIWLHVDAAYGGGLLLSKKHRLLLSGIEKADSITVDFHKSFFQPVSCSTFLLQNKTHFSNITYHADYLNPFSQYEEGTPDSINKSIQTTRRFDALKLWLTLRTQGEDSIGEMFDHVISLAHEVFLLLLADRLIDVIHTPQLSALVFRFKPLGAYSPMQLNHTNHYIRKALSRSGEALIAATKVNNEQYLKFTLLNPATTLDDIQSVIKAIKQHGLTFMQHKGW
15	MAG14_100	MAG14_100_15	134	0	0	2	1	0	1	0	4	2	0	0	0	0	0	0	10	hypothetical protein	tcactgataacaaaaattatacctatcgtattttctaactaccgtcatgcgcattgtggctgtaaacgctttgatggttctgaagaaactgaggcttctttttgtcgggatattgtgagttttaatacgttctaa	SLITKIIPIVFSNYRHAHCGCKRFDGSEETEASFCRDIVSFNTF
16	MAG14_100	MAG14_100_16	647	2	0	17	1	4	12	6	15	0	0	0	0	2	0	0	59	hypothetical protein	atgaatattaatgatctcggagccggtgatatcttgttttttagcagtgactctaatgcattgcatcatgagttagatatacatacatctattgttgtttcaggtccgccttgcatttatacgcttgatttgagtatccgcggcctagtctatgaaaaggttaataggttacctttacataaaacagctacagccttttatttaaccaatggccattctaaagatccaaatctttttaattctgtagcacaagcttggagccggcattcacagggaatcactcattccagaggttatttcagccgttcatttgtttataggtttatttttcgcagctcctcttatggcgaaaaagctatacgttatgcggcccacctgcatcaacactgtcaaacggct…	MNINDLGAGDILFFSSDSNALHHELDIHTSIVVSGPPCIYTLDLSIRGLVYEKVNRLPLHKTATAFYLTNGHSKDPNLFNSVAQAWSRHSQGITHSRGYFSRSFVYRFIFRSSSYGEKAIRYAAHLHQHCQTAVPEDLFSAYILCAYVPVALYQTIYGVDCHNIMALDAVNTTPHTLVQYLTSNPCWEYATLTSSQERSRTKLGVSLRNSGLNLR
17	MAG14_100	MAG14_100_17	731	8	4	14	6	6	8	7	28	4	0	0	0	4	8	0	97	tRNA (cytidine(32)/uridine(32)-2'-O)-methyltransferase (EC 2.1.1.200)	atgtctgacaatatccgcatcatcttaattaacacgtttcactccggcaatatcggctctacagctcgggctatgaaaaccatggggcttacagacctttggttagttagcccacagcatttcccttcgcctgatgccaatagcatggcagccggtgctctagatgtactggaaaaagcaaccttagtggccacactggatgaagctattgcaaactgttcattagttgttggcaccagtgcccgccgccgaaatatgtctatccctatgttgacaccatcagactgtgcggaaaaaatggtcattgaagctcagagcagtaaagttgctctaatatttggtcaagaaactatggggatgaccaatgaagaactattgaaatgccactttcatgttgca…	MSDNIRIILINTFHSGNIGSTARAMKTMGLTDLWLVSPQHFPSPDANSMAAGALDVLEKATLVATLDEAIANCSLVVGTSARRRNMSIPMLTPSDCAEKMVIEAQSSKVALIFGQETMGMTNEELLKCHFHVAIPANPEYPVLNLSAAAQIMSYELFQATVRIKQQGTLMPTTGKELLAECQQMEQFYEHLETALNDIGFIVKAHPGLVMNRLKRLFNRARPEIKELQMLRGILSAAQKKHIH
18	MAG14_100	MAG14_100_18	302	1	0	0	4	0	4	1	7	2	0	0	0	2	0	0	21	hypothetical protein	gtgaggttgatgaacaatgtctttcgtggtaacaagaaaaaccagcgatggctcttttatgcatgggagccacgctttaagcgagtgatcgctcacgcccttggtagaagatcaagcaaggcattaaagaaactattggaaaagctgaaaccctataaaattagttactactgtaccgatgattggaagccttactgcttagatctgcctgagcacaggcacgtggctagcaaggtatttacccagcggatagagggcaacaatctaaattttcgaactcggtcgaattacacgacaaagtga	MRLMNNVFRGNKKNQRWLFYAWEPRFKRVIAHALGRRSSKALKKLLEKLKPYKISYYCTDDWKPYCLDLPEHRHVASKVFTQRIEGNNLNFRTRSNYTTK
19	MAG14_100	MAG14_100_19	386	2	2	14	12	4	15	10	14	4	0	0	0	0	0	0	77	hypothetical protein	atgttactaagagctttagctgaatcatggggaggggaacaaactgagtattatcgtcagagtataggacttaacctaaaccgcacccagttacgctcagaagctatggttggagtttgcggggggttatcattaatgtggctggcaagttataaggcgaatttaacatctcaaatatttacgactgatacaagatacactagcgccatgtttaagtacgctcagcacgcacacctattaggcggtaattttcgtaagggaatgtcaggtcttgatgctacagccaaagccttttcattaaacgatatgggtacggaatataccgataaccggaatattggtgagttattaacggtccctcctcttatgtatttattgctgtcttag	MLLRALAESWGGEQTEYYRQSIGLNLNRTQLRSEAMVGVCGGLSLMWLASYKANLTSQIFTTDTRYTSAMFKYAQHAHLLGGNFRKGMSGLDATAKAFSLNDMGTEYTDNRNIGELLTVPPLMYLLLS
20	MAG14_100	MAG14_100_20	137	0	0	4	1	0	1	0	2	0	0	0	0	0	0	0	8	hypothetical protein	atgccgccaagagcaatcttttttgagccaaatgcaggtatttttaaatttccagcactcacgtgtatcgcacttttcctgggagagtatgtagagcaagtaaaacgccctgcgaagtttttaaaattttataactga	MPPRAIFFEPNAGIFKFPALTCIALFLGEYVEQVKRPAKFLKFYN
21	MAG14_100	MAG14_100_21	125	2	0	0	2	0	0	2	2	0	0	0	0	0	0	0	8	hypothetical protein	ttgcttgtatccattattgtcacactgaaggaatcgttaacaatggaaaagcaatcagtggatatcagtgctatctatgcaggaagtggagagatagggcagccttcagcccctgaaaactggtaa	MLVSIIVTLKESLTMEKQSVDISAIYAGSGEIGQPSAPENW
22	MAG14_100	MAG14_100_22	377	4	2	3	2	0	0	6	2	0	0	0	0	0	0	0	19	hypothetical protein	atgaacatacccgacgatatgattaaaacattggcagatatcggctttatggcgagtagttctggccatagcaagcatgcctttgctattttcagtggcatagaaacagccaaacccgatagcatactccctgatattggttatgccatggaatttatgaataaaaagaaataccaagaagccattgccctactaaaaaggcaaggactaaaaaaagaccctgaaaacactgcggtacaagcatttattggcctagcattaatgctcaacggccataataaagacgcagagaagtgccttaatgagttaacagacacaaatgatagcacggtagctaccatggcgaatgaattgctagaaaatattcacacttcctag	MNIPDDMIKTLADIGFMASSSGHSKHAFAIFSGIETAKPDSILPDIGYAMEFMNKKKYQEAIALLKRQGLKKDPENTAVQAFIGLALMLNGHNKDAEKCLNELTDTNDSTVATMANELLENIHTS
23	MAG14_100	MAG14_100_23	278	0	0	5	0	2	2	0	3	0	0	0	0	0	0	0	12	hypothetical protein	atgtccaccggttttgatcaaacgcttaataacgagtttcaacagcctggcccttcggatggatttaattttgatgcgattcagacccagtttgggaatcaggctaaattactggatgagagcctgaaggagcgtataaacaatatggatccaaacagtactcaggacatggttaattttcaggttgaattcaataaatatatgattgttgaaggtttaagatccagtattattaaatcaattaaagataccattcagagtattattcaaaaaatctga	MSTGFDQTLNNEFQQPGPSDGFNFDAIQTQFGNQAKLLDESLKERINNMDPNSTQDMVNFQVEFNKYMIVEGLRSSIIKSIKDTIQSIIQKI
24	MAG14_100	MAG14_100_24	269	0	2	4	0	0	2	2	1	0	0	0	0	0	0	0	11	hypothetical protein	atgaaaaagttgaaagatgacgatggtgcgctcaaattatctgagattgaaacatcactgatcaacgatacatcaggtgaatttagagataatttaatgagcacgctgtatgaccaaatggtgttgctaaagaatcgtcagcatcacgaaatgccaccagaggtatttgaacgcattgattcattggttcttgctctggcagcagctggtgatactgtcgccaatgtatggaaaaaacatcataaacaggtactgcaacccgacatttaa	MKKLKDDDGALKLSEIETSLINDTSGEFRDNLMSTLYDQMVLLKNRQHHEMPPEVFERIDSLVLALAAAGDTVANVWKKHHKQVLQPDI
25	MAG14_100	MAG14_100_25	1466	2	2	2	2	2	4	0	5	2	0	0	0	0	0	0	21	hypothetical protein	atgagtggctattatcttaagattctttccggtaaccatttgggggctgaaataccgctcgagccaggggaatattctctgggaaaaggagatgagtgcgacctaattcttactgatgacagcctgatggatgttaactttactctcgaaataaccgcggagggcaccctatcagttaaaacgacagcgcagcaattattgtatttaaatggtacgccagccggtcaaacgctcaaacctgatcactttgaggtatttacatctaacagtattcattttacttttggcccagccgatactccttggcctgatatagaaattcccgatctacaaaaaccagaaatacaacaaacagaaagctatgaaaatgatggctttccagaccctgatgccgatgac…	MSGYYLKILSGNHLGAEIPLEPGEYSLGKGDECDLILTDDSLMDVNFTLEITAEGTLSVKTTAQQLLYLNGTPAGQTLKPDHFEVFTSNSIHFTFGPADTPWPDIEIPDLQKPEIQQTESYENDGFPDPDADDSLTEKAHENAFIEIDDYDDAGDDEKELEINSKWLIGIPAVFFLFITTFAVMLFSDGDEATPKTVISPINQAKIIKNNLSLPDIKFRELPDGTLLISGYTQTLEKREALINQVKQKQIRFRSQVIVMDRMRANAETLLKTRGYSNLNVELDNTPGSLILTGYVVSADQLDKVTNLLKQEIYGLNDIVSQVDNQAGRVKMLKAMIKDQGLASRVHLTERPGKVLAQGLLLDSVQRYKLQEVVNRFQSRYHNKPAVIIEAKESRMSQQA…
26	MAG14_100	MAG14_100_26	1700	62	56	156	30	58	128	119	319	60	6	0	0	3	55	0	1053	Long-chain-fatty-acid--CoA ligase (EC 6.2.1.3)	atggatgaaaaattttgggatgataagaggccaccgggcgttacaaactcaattaaccttgatgcatttcctagtgtattgtcgctgattgaaagtgcattttcaaaacaggctataaagcctgcatttacaggtattgggcatacattaacttttgctgatgttgaccgttacagtaagcgctttgccagttatctgcaacattatactgaccttaaacctggcgatcgtatcgctattcagatgcctaatctgttgcagtttcctattgctgtttatggtgctatccgggcgggacttgtattggtgaacacaaatccactctacaccaccagagaaatgcggcatcaattcaaggattcacaggttaaagcattagtctttttagatgtgtttgga…	MDEKFWDDKRPPGVTNSINLDAFPSVLSLIESAFSKQAIKPAFTGIGHTLTFADVDRYSKRFASYLQHYTDLKPGDRIAIQMPNLLQFPIAVYGAIRAGLVLVNTNPLYTTREMRHQFKDSQVKALVFLDVFGHMIEEVIQDTDIKYLICTRVADMLPFPKKSLINFAAKHIKKIVKPFSLDNVVPFLTALKKGKIASYSPPPPAALDAPVVLQYTGGTTGVSKGAILTQKNLIANMLQSQAVLLQEDSNGKRLLNHGQEIIVAPLPLYHIYAFTVHLLCLPALGNHSILIANPRDMTTFIKFIKPWKFTGFVGLNTLFVGMLNHPDFSAKDFASLKFTLSGGTALQKDVAHRWEKMTNCQISEAYGLTECSPAVCINPIDGASQLGTAGLPVPETQLK…
27	MAG14_100	MAG14_100_27	401	0	0	0	2	0	2	6	4	0	0	0	0	1	4	0	19	hypothetical protein	atggagagtatattaataattgtaattggtgcttttgcactgtattacctcaatctgaaacaagatcaagcggcggatcaactaattggagaagcttttagccgatttgagcgcatatacaatggtgtgatttattcctgttatgatgcaacggttgtaatcaaaacaattaataggggtttaacattcccgtttattccctcacctaactatcatgcacgagctctttgccaaacagaacaagagcaatggttttggtttgatgccagcattaagtacatgaaactaaataaaatcaatatcacgccaacatctaaggaagaggcatttcaagtgctaaaagatgatccagaaagtttgcagcgctatttccccaactataacaaacagcagtccaca…	MESILIIVIGAFALYYLNLKQDQAADQLIGEAFSRFERIYNGVIYSCYDATVVIKTINRGLTFPFIPSPNYHARALCQTEQEQWFWFDASIKYMKLNKINITPTSKEEAFQVLKDDPESLQRYFPNYNKQQST
28	MAG14_100	MAG14_100_28	1952	28	36	119	33	57	115	209	386	124	2	0	0	6	18	0	1142	Acetyl-CoA synthetase (EC 6.2.1.1)	atgacccatacgaccttttatcacccagctgagcataaaactaaagatagtatcttgatgaataatgaccaataccttgagatgtaccagcagtctgttatcaactccgaaggcttctggagatcccacggtcaacggattcattggttcaaaccctatagcaaaataaaggacgtatcctttgatgagcagcatgttagcattaaatggttttacgacggtactaccaacgcttcctacaactgccttgatcgtcacctagaagagaaaggagaccaaattgctattatctgggaaccagatgaagaaggtgctgcacaaaaagttacttataaagaactgcatgagcaagtctgtcgctttgccaacggattaaaaagccaaggcattcgccaaggt…	MTHTTFYHPAEHKTKDSILMNNDQYLEMYQQSVINSEGFWRSHGQRIHWFKPYSKIKDVSFDEQHVSIKWFYDGTTNASYNCLDRHLEEKGDQIAIIWEPDEEGAAQKVTYKELHEQVCRFANGLKSQGIRQGDVVIIYMPMVIESVVAMLACSRIGAIHSVVFGGFSSEALAGRIINSHAKMVITADQGRRGGKTVSLKANVDAALKHEKTDSIEKVIVLKNTNAAIDWNAERDVSWQDLVTLASQYCEAREMNAEDPLFILYTSGSTGQPKGIVHTTGGYLVYASITHQYVFDYIEGDVFWCNADIGWITGHSYVVYGPLLNGATIVIHEGTPNYPDTNRLSKIIDKHQVNTLYTAPTAIRALMAEGDKAIANTHRRSLRILGSVGEPINPEAWNWY…
29	MAG14_100	MAG14_100_29	140	0	0	3	0	0	0	0	1	0	0	0	0	0	0	0	19	hypothetical protein	atgctattttttaaaaaaaaaaattatgcaacagatttactgtatgttttattttttttctatgttaggtttttcatgtttttttatcctgcaaagactggtttttccatctatataaaaagtgaaactatacaggagtaa	MLFFKKKNYATDLLYVLFFFYVRFFMFFYPAKTGFSIYIKSETIQE
30	MAG14_100	MAG14_100_30	326	8	2	25	9	8	12	5	18	0	0	0	0	1	0	0	88	hypothetical protein	atggaatggcttagtgatagcattgttaatctttctatttttagtcgacactacctatcccttattgcattaatgctgacagcggtattggttatgtgcactgggaaatacttgttgatatggagggcaggctggttagaaaggttgcctgttttagcaaggcttccgactaaagctatgctgaatatggctgctttgggctttgtgttcctgtatgtacctgattggttggcaggtatgctggggctatttaacaatatggcgctcgcacctgtattggttgttattctctttttaacaggagctgttgttgaccgatgtcgttaa	MEWLSDSIVNLSIFSRHYLSLIALMLTAVLVMCTGKYLLIWRAGWLERLPVLARLPTKAMLNMAALGFVFLYVPDWLAGMLGLFNNMALAPVLVVILFLTGAVVDRCR
31	MAG14_100	MAG14_100_31	1142	4	0	26	0	4	8	5	13	3	0	0	0	0	2	0	65	Oxygen-independent coproporphyrinogen-III oxidase-like protein YggW	ttgttaacactaccccctctcagcctttatattcatgtaccttggtgtgtgcgaaagtgtccatattgtgattttaattcccacgcattaaaacaacccaatgcacttccagcgcaagattatgtgaccgctttacttgctgattttcaaaacgagctgattaatgttcaggggcgagtattacaaactatttttattggcggcggcacacccagcttgttgccaccacaaagctatcagacactgttaactgagcttaataaaagagtaccttttgctgacgacatagagattacgctagaagcgaatcctggtacttatgaacacggccgttttcaaagttattttgatgcgggtatcaatcgtttatccttaggtgttcagagtttccagaatgaa…	MLTLPPLSLYIHVPWCVRKCPYCDFNSHALKQPNALPAQDYVTALLADFQNELINVQGRVLQTIFIGGGTPSLLPPQSYQTLLTELNKRVPFADDIEITLEANPGTYEHGRFQSYFDAGINRLSLGVQSFQNEKLKALGRIHSAEEAIHAIESLKTTGFSNINIDLMHGLPNQSKEDAQYDLNTAIALNPAHISWYQLTIEPNTIFYTTPPILPVSETIWHIQEAGQNLLESNGYHQYEISAYSQTGRQAKHNINYWQFGDYLGIGAGAHGKWRCGSTGSFYRNWKTRMPKDYLSREKPFQAGIKTLTPAELPLEFMMNALRLYDGVPVTHYSEATGLPVSTIQSAWDLACNQGLMKPGTHLVPSERGRVFLNDLLELFA
32	MAG14_100	MAG14_100_32	611	6	2	16	0	5	20	6	17	0	0	0	0	0	3	0	75	Nucleoside 5-triphosphatase RdgB (dHAPTP, dITP, XTP-specific) (EC 3.6.1.66)	gtgaaaggtgctcatactcggcaagtagtgcttgccagcgcaaatgcaggcaagttagcagaattcgataaaatgctgttggccttgaatattaatatgcgcccccaaagtgaatttaatgttagcgctgtggctgaaaccggactgacatttgttgaaaatgcccttcttaaagcacaccatgcagcagaaatcactcatttgcctgttattgccgatgactctggactagaagtggatgcactcaatgggcagcccggcatttattcggctagatatgctggtgatcacgcctcagatgccgccaataataaaaaattacttttcgagctgcgtcatacccctgcaaaccaacgcaccgcacgcttttggtgtattcttgtttatctacgtcataaa…	MKGAHTRQVVLASANAGKLAEFDKMLLALNINMRPQSEFNVSAVAETGLTFVENALLKAHHAAEITHLPVIADDSGLEVDALNGQPGIYSARYAGDHASDAANNKKLLFELRHTPANQRTARFWCILVYLRHKDDPTPIICQGSWEGMIVDTPRGLRGFGYDPLFFVPSEHCTSAELSPMTKNRLSHRAQAISKLAKRLKTHC
33	MAG14_101	MAG14_101_33	512	0	0	0	0	2	0	0	1	2	0	0	0	0	0	0	5	hypothetical protein	tcagaaaatacattatctgtgacagtaaaagagactcctcaatcaccaacaacacatgatcaggcagaggcaccaacagttttcccaacagaaattgaagcacaggtggcgcaatcagccattaagtcaacactgcctaagcaagcacctgatgtccctgcttttgttgcggtactaaatacccccactgagactatagatatccaaactcaagagcgcacaccaacggccgccattaaccctgaaccaggcattgacccttcaggcagcctaaaagcatggaccttacaattagcgaccttttctgaagaaagtaatgcgattaaacttcagaatgctctgcgctctaaaggccataccgcttatattcgcaagacagttcgaaccaatggtcgtgca…	SENTLSVTVKETPQSPTTHDQAEAPTVFPTEIEAQVAQSAIKSTLPKQAPDVPAFVAVLNTPTETIDIQTQERTPTAAINPEPGIDPSGSLKAWTLQLATFSEESNAIKLQNALRSKGHTAYIRKTVRTNGRALFRVFVGPEVRTEELDTLKARLEKEMGLSGMVVRFKS
34	MAG14_101	MAG14_101_34	131	0	0	1	0	0	1	0	0	0	0	0	0	0	0	0	2	hypothetical protein	gtggaattcttcgcaatagccccgctattacttgtcattccgccttgtgctggagtccgactgcccatgttcattatgatagttagaaaaaacgatgggtatgatgtgttatttttaagaaaacagtcttga	MEFFAIAPLLLVIPPCAGVRLPMFIMIVRKNDGYDVLFLRKQS
35	MAG14_101	MAG14_101_35	725	6	6	28	8	9	11	18	20	5	0	0	0	4	4	0	119	hypothetical protein	atgtttaagaaactgaccttaactatgatcttgtcattgaccatgctatcgacttctgcatcagctaaggttaatgtaaaaacaaatcagttacaaccaaaaggcaccgagcttaataaagcgcctaaagctgtacagaacgatactaaagcggtggatgagttagttgaaaaattacaaaccattaaaacactgagtgcaaattttagtaagacaataataggcagtgatgataaggatcatgtgatgtctggttcattattgatcaaacgacctgatctatttatttgggatacaaagaaaccttatagccagaccatttatgcgggtaatggaaagatttggaacgttgatcatagtataatgcaggtggtgattcaaaatcagggaaaagatacg…	MFKKLTLTMILSLTMLSTSASAKVNVKTNQLQPKGTELNKAPKAVQNDTKAVDELVEKLQTIKTLSANFSKTIIGSDDKDHVMSGSLLIKRPDLFIWDTKKPYSQTIYAGNGKIWNVDHSIMQVVIQNQGKDTENTPVQLLSGNARKFLQNYSVTVEQQRAERSFTLRPLSINDTLFKSLTLHFKEGKLIGFSMLDGLGNHNKIDLENVMVNQPINDSRFKPEYPKKYDVIDKSIVREKAG
36	MAG14_101	MAG14_101_36	2408	27	9	101	23	16	26	29	59	16	0	0	0	1	14	0	323	DNA translocase FtsK	atggcagcggctgtgaataagaaaaagaataaagacaaaacggcggtagcaggaggtagcgaaggtgatagtcgtatagaggatcaattgagttggagctcgttctctatgcgcttgcgtgaaggtctcatgctttttatggggctcttgtcagggtatctgtttatctcgctttacagttatgcgcctaacgatccaggttggcaatatatcggttctacctcgattattagcaacagcggtggcagagcaggggcttggcttgctgattggttatatgggctggttggcttttttgcgtggtttttgcccgtggttattttttttcaaggggtttgggtttttcgaaaccgttatcatctttggcgatgccaaccatggcatgcgctgataaaaatg…	MAAAVNKKKNKDKTAVAGGSEGDSRIEDQLSWSSFSMRLREGLMLFMGLLSGYLFISLYSYAPNDPGWQYIGSTSIISNSGGRAGAWLADWLYGLVGFFAWFLPVVIFFQGVWVFRNRYHLWRCQPWHALIKMVSFFLALCCGSALASLHYPFGGDNLPASSGGMMGMLISSKCLAIFNKVGSTLILGALFLIGLTLCTAISWFKIINLIGRVTSLMLGVLENKCLDLYRALPSWHFFIRQQYQCYRDGFKTKKPLPLAQRVMPKLKAQLTGVVPLAKTMGETELNIQAMKKKQRQPIETRISVVHRYPDAVDLLDKVTHSSSGISESSMAWVSRQLELKLKDFGVEVKVVAVQPGPVITRYEINPAPGIKASRITSLASDLARSLAVVSVRVVEVIPG…
37	MAG14_101	MAG14_101_37	161	0	0	0	0	0	0	0	4	0	0	0	0	0	0	0	4	hypothetical protein	atgaaatatcggcctggttaccaagagctaaaactgattagagtaatgtattggttaccttttgatgttgcgtataaaggagtgtggcttactcagctaaagataggatatagtgttaaagtaagcctatattcctttgactttaaatggcagcggctgtga	MKYRPGYQELKLIRVMYWLPFDVAYKGVWLTQLKIGYSVKVSLYSFDFKWQRL
38	MAG14_101	MAG14_101_38	113	0	0	0	0	0	0	0	0	0	0	0	0	0	0	0	0	hypothetical protein	ttgttaaataggacagaaaaaaatcttagcctcaaccctgatgaaatacatcctgctcatacttttttcgtgcagaaagttagtctgatgctaaataaacaaagctttagctaa	MLNRTEKNLSLNPDEIHPAHTFFVQKVSLMLNKQSFS
39	MAG14_101	MAG14_101_39	980	2	2	15	2	7	2	6	20	8	0	0	0	0	5	0	69	Kef-type K+ transport system, predicted NAD-binding component	atgccaaaagagagccgatcatgcaactacactggccactatggcccctgcaaagatcgggttattgaaggcagctgctattgcttttggcatgaccccgaagtagataagtccggatctgaggtacgtgaacagcttgaattaagagctaaaaccggcattcccatggaaggttttattctcaaaaaagcaaacttgaagcaattaaatctggttagtgaaaaacacacatcttgtcatttaattaatgctgatctaagccgatcagatctttctcatgcacatttttataaggttaatctatcgggtagttgcctactaaaatctaacttatcagatgcaaatctccaccgtgctaatctctccggttgtaacttgctaggtgtgaacctaaaatcc…	MPKESRSCNYTGHYGPCKDRVIEGSCYCFWHDPEVDKSGSEVREQLELRAKTGIPMEGFILKKANLKQLNLVSEKHTSCHLINADLSRSDLSHAHFYKVNLSGSCLLKSNLSDANLHRANLSGCNLLGVNLKSSRLERVNWGKNIYQADIVKRIDGVNEKYKVAALYEEAEEVARNIRKQCENQGLFHTAGHFFHQEMLFRRYQMPLLSSQRIISKGIDLAIGYGEKPIRIVLFSTLLVLLCSFFYFIAGLTDNGSVVIFDHTQSFAQNLNTWLDCLYFSMVTFTTLGYGDLTPHGLSRLCAALEAFTGSFSLALFVVVVVKKMTR
40	MAG14_101	MAG14_101_40	119	22	10	16	2	13	12	11	31	15	1	0	0	0	5	2	140	hypothetical protein	atggagcttaagattgacttgagccaagcggctttatttttgaatgtgttgatgaaggccgatttatttatacgaataaccctcttggtatctcgaataccgctattattaatcgtctaa	MELKIDLSQAALFLNVLMKADLFIRITLLVSRIPLLLIV
41	MAG14_101	MAG14_101_41	980	45	25	112	13	25	56	44	73	24	0	0	0	5	8	0	430	6-phosphofructokinase (EC 2.7.1.11)	atgaccaatctaaaacgtgtcggggtaatgacatccggtggcgatgcaccaggcatgaatgcagccattcgcgcggttgttcgcgccagcatctattatggccttgaaccgattactatatacgaaggttataaagggctgattgaaaatcagatgaaacaagttaatgcacgttcggtcgctaacatcatcaatcaaggcggtacgtttctgaaatctgctcgctgccaagaatttcgcactaaagagggccgatcaaaagcctttgaaaacgctaaagccgctcaccttgatggactgatagtgattgggggcgatggctcatttatgggagctatgctgttagaaaaagaatacggcttaccctgcatcggtattccaggcactattgataacgat…	MTNLKRVGVMTSGGDAPGMNAAIRAVVRASIYYGLEPITIYEGYKGLIENQMKQVNARSVANIINQGGTFLKSARCQEFRTKEGRSKAFENAKAAHLDGLIVIGGDGSFMGAMLLEKEYGLPCIGIPGTIDNDIYGTDCTIGYDTALNTVVEAIDKIRDTATSHNRLFFIEVMGRDAGFIALSAGIAAGAEEILIPEQKNSVEKLLNALQASGRAGKTSSIIVVSEGDQCGGVFELAKTVEKSFPDYEAKVTVLGHIQRGGRPSCFDRVLASRLGVAAVEALLKGESGIMVGIRQQKIINTPLERAISRPNTIDSHLVKVAEIVTV
42	MAG14_101	MAG14_101_42	521	81	38	139	22	35	153	77	123	47	0	0	0	2	16	0	733	PTS system, glucose-specific IIA component (EC 2.7.1.199)	atggggggttatcttgtgggtttcttagattctctaaaaaaaagcataggcatgggcgctgatcagggcacagaaatcaaagcacccatcacgggtgaaattgtacctattgaatcggtacccgacccggttttttctgataaaatcgtcggcgatggtattgccatcaacccaacgggtagtcggatggtcgcgccctgtgacggtaccattggtaaaatttttataaccaatcatgcttttagtatgcaaacaccctctggtgtggaactttttgtacactttggtcttgatacagttgaacttaaaggtgaaggttttaagcgtattgctgttgagggtcaagacataaaagccggtgaaactgtgatcgaagttgaccttgatttcttgaaagaa…	MGGYLVGFLDSLKKSIGMGADQGTEIKAPITGEIVPIESVPDPVFSDKIVGDGIAINPTGSRMVAPCDGTIGKIFITNHAFSMQTPSGVELFVHFGLDTVELKGEGFKRIAVEGQDIKAGETVIEVDLDFLKEKAKSIITPIVISNMDDVASIEKASGAVTEGNETLMTVHMT
43	MAG14_101	MAG14_101_43	1175	32	47	140	42	60	155	229	382	117	0	0	0	4	25	0	1238	3-ketoacyl-CoA thiolase (EC 2.3.1.16)	atgaaccttaatccaagagatgcggttattatcgattatggccgtacgccgatgggacgttccaagggtggtatgtaccataatattcgggctgaaaacctatcggctgatttaataacggcattgttggcacgcaattctggagtaaatcctgaagaaatcgaagatgtaatctggggttgtgtaaaccaaacgctagagcagggttggaatatagcccgtatggcatcattaatgacacctattcctcactcttgtggtgggcaaactattagccgtttatgtggttcctcaatgagtgctttgcatattgccacacaagctattcaaaccggaaatggtgaggtatttattgtgggcggtgttgagcatatggggcatgttggcatgatgcatggc…	MNLNPRDAVIIDYGRTPMGRSKGGMYHNIRAENLSADLITALLARNSGVNPEEIEDVIWGCVNQTLEQGWNIARMASLMTPIPHSCGGQTISRLCGSSMSALHIATQAIQTGNGEVFIVGGVEHMGHVGMMHGVDPNPRLSKYGAKASGMMGLTAELLGKMHGISREAQDAFGARSHQRAALATEEGRFGDEIIPMQGHDVDGNLSLFTKDETIRADTTVEGLAALRPVFNPKGGTVTAGTSSQVTDGASCMIIMSAQRATDLGLQPMAVVRAMAVAGVDPAIMGYGPVPSTKKVLKRAGLEMSDIDHIELNEAFAAQALPVLKDLKLLDKMDDKVNLNGGAIALGHPFGCSGVRISGTLLNVMKQNEGTLGLATMCVGLGQGISTVFERL
44	MAG14_101	MAG14_101_44	2150	74	67	186	48	101	129	340	614	185	0	0	0	4	50	0	2167	Enoyl-CoA hydratase (EC 4.2.1.17) / Delta(3)-cis-delta(2)-trans-enoyl-CoA isomerase (EC 5.3.3.8) / 3-hydroxyacyl-CoA dehydrogenase (EC 1.1.1.35) / 3-hydroxybutyryl-CoA epimerase (EC 5.1.2.3)	atgatttataaaggcagggcttttaaagtcatcaagctggaggatgacattgctgaattcaggtttgatatggaagaggcatcagtcaacaaattcagcgagtcagccatagaagatctaaattctgctattgaggcggttgaggctgataaaacaattaagggcttagtgctaaccagcggtaaagattcttttgtagtcggtgctgacattactgaattttctaacatgttcagtcaggatgattcagttttgttagacaagctattaaagtctaacacaatttttagtcgttttgaggacctccctttgcctacggtagctgctatcaatggtattgcctttggaggtgggtttgaaatttgtttatgcgcagattatcgcgtgctatcaacgcaa…	MIYKGRAFKVIKLEDDIAEFRFDMEEASVNKFSESAIEDLNSAIEAVEADKTIKGLVLTSGKDSFVVGADITEFSNMFSQDDSVLLDKLLKSNTIFSRFEDLPLPTVAAINGIAFGGGFEICLCADYRVLSTQARVGLPEVKLGIYPGWGGTVRLPRLIGADNAIEWICTGKEHKPDEALKVGAVDAVVAPDKLLVSAISLVKKCMAGALDYTARKEEKKSKLKLANIEAMMVFETAKPFVENKAGPYYPAPVEAIKSMQRHAYMERDKAIEVEAKGFVKMAKTDVTNSLVTVFTNDQLVKKKVKSFREGARETKKAAVLGAGIMGGGIAYQSAYKGTPILMKDIQQIALDHGMEEVQGLLIKQLNRGRIDSNKMAEVLNSITQTLSYGDFNTVDVVIE…
45	MAG14_101	MAG14_101_45	428	26	16	78	20	34	81	102	182	37	2	0	0	2	10	0	596	Universal stress protein family COG0589	atgaataattacaaccacgtactggcggctattgatttatccgatgaagccaatgaggttttaaaaaaagcgaaatgtattgcagaagctaatgccgcaaagctcacattagtacacgtattagagccactgagtgttgcctatggcagcgatatcccgctaaacttaacaacgcttcagaatgatatctctcaacaagcaagagaacgtatcgctcagctagccgataacatccaactagaaacaggcgagcagcatattgtttacgggcgcccagaacgtgaagttcaccgcattgccagagagtcagatgttgacctgattgtgctaggtagccatggccgtcatgggttggcactgattctaggatcaacatctactagcattttgcatggtgcc…	MNNYNHVLAAIDLSDEANEVLKKAKCIAEANAAKLTLVHVLEPLSVAYGSDIPLNLTTLQNDISQQARERIAQLADNIQLETGEQHIVYGRPEREVHRIARESDVDLIVLGSHGRHGLALILGSTSTSILHGASCDVLAVRV
46	MAG14_101	MAG14_101_46	653	23	28	84	38	18	88	38	123	28	2	0	0	8	32	0	510	Two-component transcriptional response regulator, LuxR family	atgcagcaacaggtaattaagaaagaacccaccgtttttatcatcgatgatgatgaagctgtacgtgattcgctaaaaatgctgatgagttctgtcggtcaggcttctgaaacattttcatctccggcaaattttttagaatgttacgatgaaaatcgtccaggctgtattgttcttgacattcgtatgccgggcatgagtggccttgagctacaaagcaagcttaatgaaatgcattgcattctgcctattatctttatcacggggcatggtgatgtgcctatggcggtgcaggctattaaagatggtgcgatgaattttatccaaaaaccattccgcgatcaggaactgcttgatttgatcaatgatgggctcaagttagatacgcagcagcgtaga…	MQQQVIKKEPTVFIIDDDEAVRDSLKMLMSSVGQASETFSSPANFLECYDENRPGCIVLDIRMPGMSGLELQSKLNEMHCILPIIFITGHGDVPMAVQAIKDGAMNFIQKPFRDQELLDLINDGLKLDTQQRRELLEHKEILRRLSTLTDREREVLRHVVEGKANKVIAADINLSQRTVEIHRSRVMEKMGTKSLAHLVRQVMQVTEHLEGEFNFNK
47	MAG14_101	MAG14_101_47	119	2	0	1	0	0	3	1	0	0	0	0	0	0	0	0	7	hypothetical protein	atgcctgtgcgtaacttgagtcgatttattggagttatcagctttaagctacctattaactctggtaataacattgcaaataaaagtaagtctacagctatcaacttaaagctctgctaa	MPVRNLSRFIGVISFKLPINSGNNIANKSKSTAINLKLC
48	MAG14_101	MAG14_101_48	173	0	4	0	5	1	8	0	9	2	0	0	0	0	0	0	29	hypothetical protein	atgttaggcaaacatcatcaagttttttatcgtttagattttaggccaccagcaactattttaaatgaagggtttttaggaacaaataatcctttttggatgaattgtatatatcatgaaaaaaacagtatttgctgcaaaaagcctgagaggagtatcacgattttttcttga	MLGKHHQVFYRLDFRPPATILNEGFLGTNNPFWMNCIYHEKNSICCKKPERSITIFS
49	MAG14_101	MAG14_101_49	71	0	0	1	1	0	0	0	0	0	0	0	0	0	0	0	2	hypothetical protein	atgagacaaaagtaccccagcgatatcactcgtgaacagtttgaacctattcttccgatccttgaaagtgct	MRQKYPSDITREQFEPILPILESA
50	MAG14_102	MAG14_102_50	338	0	0	2	0	0	4	0	4	2	0	0	0	1	0	0	13	hypothetical protein	atgaacgcacctcccaattggaaaaaaagcgaattccccaattggcaaaaaatttatgatataaaacagtcgctcataaaacagttacagacccaaaatggcagacaggtgcaggcaatattcttcccatttatgggagtagtcataggaaaactagacagtaccgatcaagccctaaaaaccttaatagcatcctcctttaaagatttaaaaagttactcgggtcaatgtaaatctataattgtcagcgcccaaaataataagggtagcgacaaggtggttattcaagagctagatggttctaaaaaacggtttgagtacacgtttaattcaaagtaa	MNAPPNWKKSEFPNWQKIYDIKQSLIKQLQTQNGRQVQAIFFPFMGVVIGKLDSTDQALKTLIASSFKDLKSYSGQCKSIIVSAQNNKGSDKVVIQELDGSKKRFEYTFNSK
51	MAG14_102	MAG14_102_51	560	11	6	20	4	10	21	4	24	16	2	0	0	2	0	0	120	Cell division integral membrane protein, YggT and half-length relatives	atgtccgctgcacttgtatccagcctgctttttttaatacagacgctgggagcgctgtatatcatggctgttctgctacgcttcctcttacaggtcacgcatgcagacttttacaacccaatatcccaggccattgttaaaataacatcgccattgttaaacccgcttagaaaaattattcctgggtttggaaaagttgatgcggcttcactggttttagcgttggctctgcaaatcgcactcatttatggcatgtcttcgattaaaggcattagtctgtcattgatttcttttcaagccgtattgatcgtaagcctgatcgagcttgcaacccatattctaaatatctaccttttcagtttagttattattgctatagccagttgggtagctcagggt…	MSAALVSSLLFLIQTLGALYIMAVLLRFLLQVTHADFYNPISQAIVKITSPLLNPLRKIIPGFGKVDAASLVLALALQIALIYGMSSIKGISLSLISFQAVLIVSLIELATHILNIYLFSLVIIAIASWVAQGSYNPGLMLLLQITEPLSSRVRRIIPPIGGLDLSLMVIVIIIYFLKNLLAGIVY
52	MAG14_102	MAG14_102_52	833	27	28	55	6	17	55	57	146	21	2	0	4	3	25	0	446	Pyrroline-5-carboxylate reductase (EC 1.5.1.2)	atgatgagcattttaaataaaagcattggagtgattggcgctggaaacatggcgcaagccattatcggtggtttgctaagaggtggttgtcaaccggaacagattatcgcgacagcgccgagtgaaaaaacacgcttaaccattagtcaacagtttggcgttcatgtctctgctagtaacttagaagctgcaggaagcgatgtgctgttactatgcgtaaagcctgatgtaatgaaaaatgtgttaacagagatagcaccggtattggcttcacagaagaaaacgcttgttatttctgttgcaactggcattaccgtggattgccttgaacgttgggcaggttgttcgttgcctgttatacgcagtatgcctaatacgccttctcgtctgggtgtgggg…	MMSILNKSIGVIGAGNMAQAIIGGLLRGGCQPEQIIATAPSEKTRLTISQQFGVHVSASNLEAAGSDVLLLCVKPDVMKNVLTEIAPVLASQKKTLVISVATGITVDCLERWAGCSLPVIRSMPNTPSRLGVGACGLFANTNVSAEDKGLAESIFSAVGIFEWVADEALIDTIIAVSGSAPAYYFLFMEAMKNNGVALGLTPEVAERLTQQTALGAAKMASESTLSVAQLRKNVCSPGGPTEQALQAFQQGGIEPIINNAMQAAVKRAKEMTKELSK
53	MAG14_102	MAG14_102_53	734	42	36	73	20	21	46	36	66	43	0	0	0	3	13	0	410	Pyridoxal phosphate-containing protein YggS	gtgggtaatgttggtgctttttctaaagcggtagaattgtgtaagcaaatgtcatcaataaaagagcggtttgaacaagtcaatcaacgtattaggcaagctaaagccaccagcaatcgcaccgaccaagtctgcctactagcggtcagcaagaaaaaatcagttgcgatgatccaacgcgcctatgaattagggcagcgtgattttggggaaagctatgtacaggaggcgttgactaagatagagtcgttatcgactttatcaggcatttattggcattttatcggtcccattcaatcgaacaagacccgtgatattgcctctggttttagctgggtgcacagcgtagatcgattaaaggttgcacagcgtttaaatgatcaacggcctctagcactt…	MGNVGAFSKAVELCKQMSSIKERFEQVNQRIRQAKATSNRTDQVCLLAVSKKKSVAMIQRAYELGQRDFGESYVQEALTKIESLSTLSGIYWHFIGPIQSNKTRDIASGFSWVHSVDRLKVAQRLNDQRPLALPALNVCLQVNLNQEAGKSGVSINALPELVNNIIMLPRLKLRGLMIIPAKEQDPIKQREPFKALAELLASLNHSQHLSMDTLSMGMTNDLDAAIAEGATMVRIGTALFGARH
54	MAG14_102	MAG14_102_54	1034	0	2	8	6	1	4	0	6	2	0	0	0	0	0	0	29	Twitching motility protein PilT	atggatattactgagttgctggcattcagtcataaacaaggtgcttctgatttgcatttatcagcaggtttgcccccaatgattcgtattgatggtgacgtgaaacgggtaaatgtgcctgctatggaacacaaagaagttcatgctttgatttatgacatcatgacggataagcaacgtaggcattttgaacagaatctggaaagcgattttgcctttgaggtgcctggcgtggcgcgttttcgggttaatgcatttaatcaatgccgtggggcaggagccgtatttagaacaattcctagcaaattattaaccatggaagacttgaatatggggcaagtttttcgagatattgcaatgaagccaagaggtttagtatgtgtaaccggttcaactggt…	MDITELLAFSHKQGASDLHLSAGLPPMIRIDGDVKRVNVPAMEHKEVHALIYDIMTDKQRRHFEQNLESDFAFEVPGVARFRVNAFNQCRGAGAVFRTIPSKLLTMEDLNMGQVFRDIAMKPRGLVCVTGSTGSGKSTTMAAMLDYINDNKYEHILTIEDPVEFVHQPKKCLVNQREVHRDTLSFDNALRSALREDPDIILVGEMRDLETIRLALSAAETGHLVFGTLHTTSAAKTIDRIIDVFPTDEKSMVRSMLSESLEAVISQALLKKVGGGRVAAHEIMLGTSAIRNLIREDKVAQMYSAIQTGSNIGMQTLDQCLEELVKSKVVTPEIARDKAKDPTKF
55	MAG14_102	MAG14_102_55	1784	14	25	73	2	8	27	28	125	20	0	0	0	0	18	0	340	Acyl-CoA dehydrogenase 2 [fadN-fadA-fadE operon] (EC 1.3.8.7)	atgattaaatacaatgcccctttgcgggatatgcactttgttatgtatgaagtattcaatgcagaacaacgctggggtcagtggcaaaataactgtggtgtagataaagaaactgctaatgctgttcttgaagaaagtgccaagctagcttcccaagttattgggcctttaaatcattctggagatcagcaaagctgttctatacacgataataaagtatcaactcccaaaggctataaagcagcttaccaacaatatgcctcactaggctttatagggttaggcggtaatcctgaatatggaggcatgggaatgccaaaggtgattggtgcacaagttgatgaaatgataagcagcgccaatctagcttttactctatacccaagtctcaccgctggc…	MIKYNAPLRDMHFVMYEVFNAEQRWGQWQNNCGVDKETANAVLEESAKLASQVIGPLNHSGDQQSCSIHDNKVSTPKGYKAAYQQYASLGFIGLGGNPEYGGMGMPKVIGAQVDEMISSANLAFTLYPSLTAGVALTLDTHASEQIKAQYLPKLYSGQWSGTMCLTEPHCGTDLGMIRTKASRNEDGSYLITGTKIFITGGEHDLAENIIHLVLAKLPSSAAGTKGISLFLVPKININDHGSLTDRNKVSCSSLEHKMGIKASSTCVMNFDNARGYLIGEANSGLAAMFTMMNYERLFVGIQGLGCSVMSYQTAAAYAKDRLQGYSAMSDAKKQHKTANPIIVHGDVRRMLLNMKALNEAGRAFSTYVAMQLDIVKFSDNPEEKQRAENKVALLTPVAK…
56	MAG14_102	MAG14_102_56	1802	25	42	125	14	38	79	54	184	26	2	0	0	4	40	0	635	Long chain acyl-CoA dehydrogenase [fadN-fadA-fadE operon] (EC 1.3.8.8)	atgccagagtacaaagcaccgcttcgtgacatgcgtttcgtccgtgacgagctactgaactatgctcaccactattcccagctaccagaagcagaagaggcaacgcctgatattgccgacgctatcttggaagaagcggccaaattctgcgagcaagtactctctccgctaaataaagtaggagatgaacaaggttgcaaactcgttgggggtaaggtagagacgcccaagggctttaaagaagcctatcaacagtttgttgaatgtggctggccctctcttgctcataataaaaaatacggtggtcaggggttacctagctctcttggcgttgtattgactgaaatgatgggagaatccaattgggcatggggtatgtacccagcgcttagcggtgga…	MPEYKAPLRDMRFVRDELLNYAHHYSQLPEAEEATPDIADAILEEAAKFCEQVLSPLNKVGDEQGCKLVGGKVETPKGFKEAYQQFVECGWPSLAHNKKYGGQGLPSSLGVVLTEMMGESNWAWGMYPALSGGAIATLETHGTEEQKQTYLTKLVSGEWTGTMCLTEPHCGTDLGLLRTKAEPQDDGSYKISGAKIFISAGEHDISKNIVHIVLARLAGAPEGTKGLSLFIVPRQLPENNGASTQRNGVSCGSLEHKMGIHGNATCVMNFDRASGYLVGGPNNGLNCMFTFMNAARLGTGLQGIAHGEIAFQGALRYARERLQSRSLSGVKYPESPADPIIVHPDVRRMLLTIKAFTEGSRAFAYYTAKLVDLALYSKDRKEKELAELQLGFLTPIVKA…
57	MAG14_102	MAG14_102_57	137	1	1	4	0	0	2	0	0	0	0	0	0	0	0	0	8	hypothetical protein	atgccttctattctatttacagtattaattgttaatagtttctcttttgacgttacatttaagtttttagttgcaatcaagttagtactactaacagccttgtcagacttaacaaaggttgacatagtaagggattaa	MPSILFTVLIVNSFSFDVTFKFLVAIKLVLLTALSDLTKVDIVRD
58	MAG14_102	MAG14_102_58	794	0	2	0	2	0	0	2	6	0	0	0	0	0	0	0	12	hypothetical protein	atgaacccagtacattttgcttcacctccgggtagcactcactcaactcactactctcggtcttctatgtcacccactcctaggctaccaagagagaggaaagataaactagcaacaatgcctaagtttgccagtaaagcagcacacacagtgccagcaaaaaactatcctattaaaaagggtgcaaacgaaaaaactgctattcaaaaaaaaataatgagccgatctaaaattgaaaaatcgactcttattgaaattttaagtataaaaaaatatttaaaaattcagcataatcttcttttatcattattgagggaaggaaataattctttaattaaaccagcaaatacagattctaaaaaagaatcagacttgataaaaacaccatgcaaaccaaaa…	MNPVHFASPPGSTHSTHYSRSSMSPTPRLPRERKDKLATMPKFASKAAHTVPAKNYPIKKGANEKTAIQKKIMSRSKIEKSTLIEILSIKKYLKIQHNLLLSLLREGNNSLIKPANTDSKKESDLIKTPCKPKYKKPPPCVQEEKKLKKSKYKDKPTGSKYPAFNSRQSFAKGKDEALPSSHKKSEELKNAESRISELEKLISEKNNKHPHGIKKRKKLTDDKPTFISMVGSFLNFLKEATYMVIEIIVPILTLIKSIKDMQKQ
59	MAG14_102	MAG14_102_59	632	4	2	16	6	24	7	9	11	6	0	0	0	2	2	0	89	Endonuclease III (EC 4.2.99.18)	atgaataaggaaaaacggactcgcatattcctgcgtttgcaggagcaaaatcctcaacctaccaccgagttgaactatacatcgccttttgagctactcatagccgtaattctttctgctcaagcaacagatatcggggttaataaagccactgataagttataccaaatagctaatacgcctgaaaaaatagcggctctcggtgtggataaactaaagcaatatattaaaaccattggcttatttaacagcaaagctaacaacattattaaaacctgcaatattttgctggaaaaataccatggcgtggtacctaatacacgagacgccttggaagcattgcccggtgttggcagaaaaacagctaatgtcgttttaaatacagcatttaatcaacct…	MNKEKRTRIFLRLQEQNPQPTTELNYTSPFELLIAVILSAQATDIGVNKATDKLYQIANTPEKIAALGVDKLKQYIKTIGLFNSKANNIIKTCNILLEKYHGVVPNTRDALEALPGVGRKTANVVLNTAFNQPAMAVDTHIFRVANRTGIAPGKNVLEVETRLMRRVPKEFIMNAHHWLILHGRYVCKARKPQCGSCLIEDLCEFKEKTS
60	MAG14_102	MAG14_102_60	173	2	0	3	2	3	3	6	7	2	1	0	0	0	0	0	29	hypothetical protein	ttggaacttctcgcaatagctctgctattactcattattgcgccttgttcaggagtctggctgcccatgcttattacggtagttagcaaacatggttggtgtaatatgtttacgccatgttacgtagaaaaaccgcttaatgattacatgttaaattgtgctatacaaggttga	MELLAIALLLLIIAPCSGVWLPMLITVVSKHGWCNMFTPCYVEKPLNDYMLNCAIQG
61	MAG14_102	MAG14_102_61	2480	8	4	48	6	16	19	34	71	28	2	0	0	2	8	0	246	Glycerol-3-phosphate acyltransferase (EC 2.3.1.15)	atgcaaaaatcagttttcatgaatcgttttattttccatagcctcagaaaaattctgtcgagctgggttcgcacaacagtaacaaataacagcgttgatcatttgagaatagaccccgaaaaacctgtttgctacgtctttcgcaatcgttctttttcagacctgttgatactggaaaacgagtgtattaaggcaaaactgccccgcccacatcaatctattctcacctcgagtacgaaagaaaattactcattcttctacctaagccagcaagaaggttttatttttcaaagagagcgccccaagtcattaaccacactagagtccttacttgcttatgttgaaaaagcaacagatagagatattcagttggttcctgtgtctatcttttggggacgt…	MQKSVFMNRFIFHSLRKILSSWVRTTVTNNSVDHLRIDPEKPVCYVFRNRSFSDLLILENECIKAKLPRPHQSILTSSTKENYSFFYLSQQEGFIFQRERPKSLTTLESLLAYVEKATDRDIQLVPVSIFWGRSPDKEHSALKLLFDWNFNLGGRCRKFLATLIHGRSTLVHFNPALSLKALTDEGNDHDRTLRKVGRILRVHFRQQRTSIIGPDLSHRRTLVNDLINRPEITKAIQAEASAQSISLEEAKYKATQYANEIASDFSFPVIRFMDILLTWFWNKFYSGVHISNIEHLNELAKTNTIIYTPCHRSHIDYLLLSYVLYHKGLTPPHIAAGINLNMPLIGTFLRKSGAFFMRRTFRGNPLYSSIFYEYMFTLASKGFPIEYFIEGGRSRTGRA…
62	MAG14_103	MAG14_103_62	659	14	7	27	10	25	68	66	48	41	0	0	2	2	2	0	312	Glutathione S-transferase (EC 2.5.1.18)	gcattaggctattccgatgcagagtatgatgcgcacttgataaggattagcaacggagagcaatttggtagcgattttgttggtatcaacccaaactcaaaaataccagccatgcttgattgtagtgtaactccccccatccgtgtatttgagtcgggttctattttgctttatttagcagaaaaatttgatatctttttgccaaaagatgctagaagtcgtacagaatgtctaaattggctgttctggcaagtaggaagcgctccttatgtgggtggagggtttgggcatttttataaatatgcacctttaaaaatagagtactgcattgaccgtttcacaatggaaactaagcgacaactagacgttctaaatcaacatttagagaaatcaacctat…	ALGYSDAEYDAHLIRISNGEQFGSDFVGINPNSKIPAMLDCSVTPPIRVFESGSILLYLAEKFDIFLPKDARSRTECLNWLFWQVGSAPYVGGGFGHFYKYAPLKIEYCIDRFTMETKRQLDVLNQHLEKSTYMVGETYTIADIAIWPWYGSIVLNDTYEAAEFLNAEEYTHLCRWAKHIEKRIPVKRGRIANKTFGPVEKQLHERHNATDLDKIFDSA
63	MAG14_103	MAG14_103_63	791	0	0	3	0	4	1	0	3	0	0	0	0	0	4	0	15	hypothetical protein	atgaaaatcaaaactgttaaaaataatcttttaaggtttaatggctattttttattatcattgttcattacaacgttttcttttgcggatgatccttgcggggggtactttgctgactatgagctaaaatgcccaaaatataataaaaaacatgatggaatgtgggcagaggctagtgttattccatgtaatatagaaacgctagaggtcgataacattgaactcaataagttacttgaagagttaaaaaaacatggcaatcctaaacagaaggccattctagatgaaatgcacgctgcttgggaagcgcttaaaatagcacagtctgcattagtcagaacctattatgagggtgtaacctatgaaaaatggacgacgggtagtgaagttgcgatgaca…	MKIKTVKNNLLRFNGYFLLSLFITTFSFADDPCGGYFADYELKCPKYNKKHDGMWAEASVIPCNIETLEVDNIELNKLLEELKKHGNPKQKAILDEMHAAWEALKIAQSALVRTYYEGVTYEKWTTGSEVAMTQARIKELKQLREVILHKKDGLKTNIQHEGVAFSYDKQALKNDTLKLNAQFDRLMKYATKEQQLILKDMQTAWRNLKKAQSELIGAYSNNIDYLENMYAYDTDMTRKRLEALNQLGQGILWQARDTEEENK
64	MAG14_103	MAG14_103_64	308	0	2	4	2	3	2	5	1	4	0	0	0	0	0	0	23	hypothetical protein	atgaacgaagaaaacgtcaaaagactggcattagttattgctgcaaactgcatgaaagactcggtaattgaagcatgccagcagcaaaacaaggtgtctgataacgaaataagcgcatttaaccaacaactatctgataggctttatacgtttcttacttatttgctaacaaagccagcagatgaatatactatcatgatggaggctatgttaagtcactatcctgatgattggcctcagcctatgctggatcagcatcttattcaagataagcagttgctagaaacagcagtgacaccctccatataa	MNEENVKRLALVIAANCMKDSVIEACQQQNKVSDNEISAFNQQLSDRLYTFLTYLLTKPADEYTIMMEAMLSHYPDDWPQPMLDQHLIQDKQLLETAVTPSI
65	MAG14_103	MAG14_103_65	974	2	0	16	6	7	8	3	18	6	0	0	0	0	2	0	68	hypothetical protein	atgttatcagttctcgtaatacatcaaaaaaaacaatgcggcataggcaatattatctttaggctaatcactgagcttaaaataggtgtttgccttttatggacagttattatgctattaagcacgtcattgcaagccgatgaaaatacattatttgatcagcttgaccagttagaaactttattgcaggtccctcatcaaaaaacaagagcatccatgatagatgctgcacaggtatggcgtcgacagaaagacaaagaaaggtgggatgtacagccgatgcaactttcacctaaagtaaaaaaagaagccatggatttattgaccagcatggggttggtcaatgcgctcaagccagacaaacagcattatgattacatcctgtggctgggcgctact…	MLSVLVIHQKKQCGIGNIIFRLITELKIGVCLLWTVIMLLSTSLQADENTLFDQLDQLETLLQVPHQKTRASMIDAAQVWRRQKDKERWDVQPMQLSPKVKKEAMDLLTSMGLVNALKPDKQHYDYILWLGATIPRMRSRLNQIINLWNQGIRAKHIVSLTGQRPLTAKIDKPKLLLQEANLSTKNSLVYPSNETEAAKMIWLLKDLPTTMQTLGCQFISSERRWQSTYWQRPNTRDTLKKWLATKPTPGSVLVISDQPNALYQKVVTETELPDTFTVSVSAEAISSKNDISLYLDALALWLHNMPREKTMSKSLQPVSAPVGH
66	MAG14_103	MAG14_103_66	611	13	7	20	6	13	30	18	14	3	2	0	0	0	1	0	127	Flavin prenyltransferase UbiX	gtgaccgatacgattacccttgcaatgaccggtgcatccggcgcacagtatggcctgcgactgttgcaaagtcttgtcgttgcagataaacgtattttctttatggtttcaaaggctgcacaagtggttttgcagacagaaacgctattacctttaacaaacaacatagaagaaatacaacatacgctgacagcatatactaaagcacagcctaaacagattaacgtgtttggtcgagaggactggatggcgccggtggcttcaggcagtggagcatcaagtaaaatggtgatttgcccttgcagctcaggaacgctctcgtcaattgcctatggcgccagtaacaacttgattgaacgggctgcagatgtcgctttaaaagagcgacgtcagctaata…	MTDTITLAMTGASGAQYGLRLLQSLVVADKRIFFMVSKAAQVVLQTETLLPLTNNIEEIQHTLTAYTKAQPKQINVFGREDWMAPVASGSGASSKMVICPCSSGTLSSIAYGASNNLIERAADVALKERRQLILVSRECPLSEIHLENMLKLTRMGAVILPASPGFYNQPKSIDDLIDFVVARILSQLGIDQALMPDWGADRL
67	MAG14_103	MAG14_103_67	1349	11	12	55	15	34	33	57	82	37	2	0	0	0	7	0	345	UDP-N-acetylmuramate:L-alanyl-gamma-D-glutamyl-meso-diaminopimelate ligase (EC 6.3.2.-)	atgcacatacatattctagggatatgcggatctttcatgggtagcctggctattttggctcgagatcttgggattaaagtatctggatcagatgctcaagtttacccgccaatgagtactcaactagcagatgcaggtattgaactcatggagggatacagcccagaacatctgagcccggaacctgatttggttgtaattggcaatgctttgagccgtggcaaccccgctgttgaacatatccttgataagagcttgccttatatatcagggcctgaattttttgcccgctatattttgaatgataaatgggtattagctgtgtcgggtacccatggaaaaacaaccgtatccagtatgctggcttggattctagaacatgctggcatgaaccccagc…	MHIHILGICGSFMGSLAILARDLGIKVSGSDAQVYPPMSTQLADAGIELMEGYSPEHLSPEPDLVVIGNALSRGNPAVEHILDKSLPYISGPEFFARYILNDKWVLAVSGTHGKTTVSSMLAWILEHAGMNPSFLIGGVPENFGISARNGNTPFFVVEADEYDTAFFDKRSKFIHYRPKTLIINNLEFDHADIFEDLAAIQKQFHHLIRTVPRLGRIIFPAHDQAIQDVLSQGCWSEQEPLGDNWTTTIKSKDGSSFDVQKQGLLCGTVQWGQTGQHNVDNALAAITAAYHVGVLPEVACEALCRFKGVKRRMELVADVRGVKIYDDFAHHPTAIATTLQGFTDQVRESPVRVIIEPRSNTMKMGVHKQNLVQATKQASEVIWFKPHDLNWSLEDAVAS…
68	MAG14_103	MAG14_103_68	602	6	2	18	0	2	3	4	5	4	0	0	0	0	0	0	44	HNH endonuclease family protein	atgcatatcctccgactaaacaaagcaggacagcccattgaatggttaacgtggcaagacgccatctgtctgtattcacgcgatctagtatgctggagcttgggcgatattatttatcgtgcaagaggtggatataatcgtatcaccggcagaaaaacagtcattgagctaccgagcattattgcttgtggcgggaaaaaactggttcatccgagaaataatcccattttaagcaatgcggccctgtttgaaagagatggttttcaatgcatgtattgcggcaaatatttccataaaacattaatgaccagagatcacattgtacccagctctcgcggtggcaaagatgtatgggaaaatgtagtagccgcttgcaaacgctgcaatcaacacaaagac…	MHILRLNKAGQPIEWLTWQDAICLYSRDLVCWSLGDIIYRARGGYNRITGRKTVIELPSIIACGGKKLVHPRNNPILSNAALFERDGFQCMYCGKYFHKTLMTRDHIVPSSRGGKDVWENVVAACKRCNQHKDNHLLQEINMSLIALPYRPNAAEYLALVNSRRILPDQADFLSKQFSRNYRKQNNPQLKNTQDTSSIVQ
69	MAG14_103	MAG14_103_69	587	2	2	15	7	12	7	0	3	4	0	0	0	15	6	0	73	hypothetical protein	atgaaaaacctatgtgcagctgtcaccttaggacttgcgggtattgctgcgtccaatgctatggctgatgataatatgtttatgggggctgagtttggacgtaacaatattaggatatccgctggagaagaaacaaactcggataaacaaaatcaatacggtatcagatttggttcttatctcaatgaacaggtaagagcttatgtcagcttacataagcggagtgattactctgactcagtagatctagcatcgataaaagcacaaaactaccagtttttactatcatctgactatctctttgatttaggctatttggttaagccctttattggagcaacggtgggttttaatcggtcaaaatttaagctaacttccatcaaaactgtggaggatact…	MKNLCAAVTLGLAGIAASNAMADDNMFMGAEFGRNNIRISAGEETNSDKQNQYGIRFGSYLNEQVRAYVSLHKRSDYSDSVDLASIKAQNYQFLLSSDYLFDLGYLVKPFIGATVGFNRSKFKLTSIKTVEDTKYGFVYGAQAGLVAQVDQFDIELGYRYLKMNTKGDLTFAANAKLEYTLDYSKTPYLAVSYKF
70	MAG14_103	MAG14_103_70	1949	19	6	62	16	20	51	83	132	41	0	0	0	0	4	0	434	Acetoacetyl-CoA synthetase (EC 6.2.1.16)	atgtcatccattttatggtcacctgacatccagcgtattcaagattgctcactgtctgcttttattgcgtttactgaaagcagaacagggctatgtttttcagactattccatgttgtatcaatggagtgtccgtgatcgagtaactttctggcagatccttactgaattttttaatattcaatttcatcatcgaccatcagctattcttgagcaagatgcaatgccaggggctaaatggttttctgatgcaacattaaactatgcagaacatttactcaggccccagcataaaggcacggcaattatttttaggggggaaaagagccagcgttcaacattatcatttgccgaactagttaagcaggtagcggctgcgcaggcaggcttattaagcgcg…	MSSILWSPDIQRIQDCSLSAFIAFTESRTGLCFSDYSMLYQWSVRDRVTFWQILTEFFNIQFHHRPSAILEQDAMPGAKWFSDATLNYAEHLLRPQHKGTAIIFRGEKSQRSTLSFAELVKQVAAAQAGLLSAGVVKGDRVSAILPNCLETMVLMLATTALGAVWSSCSPDFGVQSVIDRFNQIKPKVLIVTDGYFYNGKMFDWTEKIAKVQSGLDNIALTVVVPFTNQDNTTVTNAKTILYEDFLDLEQHAVFFEPVAFNHPLFILYSSGTTGVPKCIVHGHGGTLLQHLKELGLHTDVKTGDRVFFFTTCGWMMWNWLASALALGATLVLYEGSPFYPKSTTLFDIAEQEQITVFGTSAKYITALEKSGAKPIETHDLSHLKTLLSTGSPLADESFN…
71	MAG14_103	MAG14_103_71	1985	21	8	51	7	20	32	6	36	10	0	0	0	0	12	0	203	Secondary glycine betaine transporter BetU	atgtcagctccagcgtcctcagcgtcgcttacatcacgtattaacttttttgtatttttgtgctccacagtactgatcatactcttagttgcaatgacggccatatatccgcagcatatcagcacggcgtttacttggctacaacaagttatcatggctaatgccagctggttttatatagccgctgttgcccttatactggtatgcaccgcctaccttggcttatctcgttttggcgcaattaagttaggtccagaccacgccacaccagattttagctttgcttcttggttttcgatgttattttctgccggcatgggcgttggcttagtgttttttggcgttagcgagccagtgctgcatttcctctctccccccatagggcagggtggtacgatg…	MSAPASSASLTSRINFFVFLCSTVLIILLVAMTAIYPQHISTAFTWLQQVIMANASWFYIAAVALILVCTAYLGLSRFGAIKLGPDHATPDFSFASWFSMLFSAGMGVGLVFFGVSEPVLHFLSPPIGQGGTMKAAKEAMNITFFHWGLHAWAIYAIVALILAFFGYRRGLPLTLKSALYPLIGQRINGPIGYAVDVFSILCTVFGVATTMGYGVLQVNAGLNYLLGININTQNQVFLIVGITALATLSVATGLKKGIKYLSEANLFIALLLLLAILCLGPTSFLFRALVENTGNYFSGIIDKTFNLYTYSPHNKWLGGWTLFYWAWWISCAPFVGMFIARISRGRTIREFVGGVMLVPAGLTFIWMTVFGNSAIELIANQGAADLGSIVQHSPPIALF…
72	MAG14_103	MAG14_103_72	1013	5	2	12	2	2	1	4	4	0	0	0	0	0	0	0	32	hypothetical protein	atgataagacgtttttttttaagcatattgattgttttttttaccctgcaattagctgttgcagaaaatgaagaggatctttctctaaaagatgtaactagtagcacttcaaggtcaaatcagctttatcaaggcggtatgcttatgcttatgggggtagcacaaattgccattggagctacaacatggatcttccactcagataatcatggcgatgaagatgcattggatttcagtggcgaccatcatgatgatgcattgcatttcagtggtgatcaccacgatcatgacagctcatttttaaccgtggttgccgtggggcatatatgggaaggcgcatgcaatgttggggcaggttttactagaatcattggcgcatttaagcacgacaacaaaagg…	MIRRFFLSILIVFFTLQLAVAENEEDLSLKDVTSSTSRSNQLYQGGMLMLMGVAQIAIGATTWIFHSDNHGDEDALDFSGDHHDDALHFSGDHHDHDSSFLTVVAVGHIWEGACNVGAGFTRIIGAFKHDNKRHKVLATTLQTLSLTGTGATAYAGLTNSDLLHGYCHSAQTALGLLTTLPHIIAWTYPLITKDKTEHPLFKKVKNAFSTSGFGLEVIPLVIVAVDMSSGLYATEAACSGLLCLLGSKHYLCDHAKQKCDKHKHTQCERGCLTTRDRDGVPLMIEAATKEPADENEDDPEAGGLKNAAIVWIRQDDDNSDFNMASPTLNFIQDEQSE
73	MAG14_104	MAG14_104_73	473	0	0	2	0	2	0	4	4	0	0	0	0	4	0	0	16	Ribosomal-protein-S18p-alanine acetyltransferase (EC 2.3.1.-)	atgctctcatttcgaaatatgaccgaacaagatttaccgtgtgtatctaaggtagaacattcagctgggcgctatccatggcaacagcatgcctttattgatagcctaaaatcaaaccactgctgtaaagttgcacttattggggatgttattatcggtcatggcattataatgaccgtgcttgatgaagcgcacttattgattttatcagtggataaagcttaccaaagaaaaggctacgcaaaggcactgctacgccatttaattcaagaagccgaaaagcggcaagccacaatattgtttcttgaagtacgagaatctaataatgttgcctttcaattctatttaaaccagggtttcaatgaaattggtagtcgaactaattattaccctactaaa…	MLSFRNMTEQDLPCVSKVEHSAGRYPWQQHAFIDSLKSNHCCKVALIGDVIIGHGIIMTVLDEAHLLILSVDKAYQRKGYAKALLRHLIQEAEKRQATILFLEVRESNNVAFQFYLNQGFNEIGSRTNYYPTKRGEKENAILMAATLFPSNNLPRDY
74	MAG14_104	MAG14_104_74	797	6	2	20	8	17	4	13	22	6	0	0	0	0	2	0	100	hypothetical protein	atgcaggccagagaaaataaccgacaagcctaccttgatgctatgggaattcaagtgtggttcccgcgaaaggtgctgcccaatgctcagccagcacggccatttgactggtttatcgaagagcaagagcatgcgccagattctagtctttattcaatacctaaatccattgattcagactcaccatcccctgtggctccaatacagccggtaagagcaacagatgtactcaatcatatcagctcggctcagcctgtcattgctaaatcagtgccaccctccagcattgtagccaaagctgctgctaccattacttcatttcgattagtggtaataccgctggatcagcagcatttagtagtcgctgatatgccttatacgggtctaagtcaatttacc…	MQARENNRQAYLDAMGIQVWFPRKVLPNAQPARPFDWFIEEQEHAPDSSLYSIPKSIDSDSPSPVAPIQPVRATDVLNHISSAQPVIAKSVPPSSIVAKAAATITSFRLVVIPLDQQHLVVADMPYTGLSQFTRYHHRLLQDLARAFQLPQPVFETAREFVWPLTSRAEGLLHQISQNDQAATDAVNAFLVNQYDLPQKKLVLLLGQAAAHFVFDPMRTFEELRGVHPEADTEQTVAITHGLNELMKIPSLKVDTWADLQALITT
75	MAG14_104	MAG14_104_75	860	6	5	16	2	4	13	6	35	6	0	0	0	1	5	0	99	Peptide chain release factor N(5)-glutamine methyltransferase (EC 2.1.1.297)	atgagtacaacaattcatgagctactaacagcagcagttaaacagcttaacgaccccttagctttgtctagtgatactgttcgccttgatgcagagttgctgttaagtcatgtgctcaaaaagcccagaagctatctgtttacttggccagacaagcgcgtttctacagcagataccgcagcatttcatcattgtattgggcaacgagcaacaggattacccgtggcttatattacaggcaaaaaagcattctgggaccttaaccttcaggtaaccccaaatgtgctcattccgcggccagacacggagctgattgttgagttagccttaacaaaaaaactgcctgataatgcggtggttgctgatttaggcaccggtactggcgctattgcgctggcg…	MSTTIHELLTAAVKQLNDPLALSSDTVRLDAELLLSHVLKKPRSYLFTWPDKRVSTADTAAFHHCIGQRATGLPVAYITGKKAFWDLNLQVTPNVLIPRPDTELIVELALTKKLPDNAVVADLGTGTGAIALALARERPNWQIYATDNSMKALAVAATNAKANNIDNVTFLSGSWCYALGGLRPHIIVTNPPYIRQSDYHLQQTEIRFEPLSALASGDDGLHDIRQIISQSVNKLMPSGWLLIEHAFDQGKAVINLLNLHGYSMVSTAKDLAGHDRVTMGRITLCS
76	MAG14_104	MAG14_104_76	1091	6	4	12	4	4	15	16	57	6	0	0	0	2	2	0	128	Peptide chain release factor 1	atgaaagcatccattattgctaaactgagccacctgagagaacgatttgaagaaatcggtatgttactgagtgacgctgaggtcatcaaccatcaggataggtttcgtcaactttccaaagaatacgctgagttagaaccgattataaaagcgtatcaagactatgatcaggttttgtctgaccagtctgaagcaaaatacatgatgaccgagagtgaccctgagctagcagcaatggctgaagaagagcttgccttatgtaatagccgactaccaacgctagaagctgccttacaggtactcttactccctaaagatcctcgcgatagttgtaatacattccttgaaattcgagccggcactgggggagatgaagcggctatttttgctggcgatctg…	MKASIIAKLSHLRERFEEIGMLLSDAEVINHQDRFRQLSKEYAELEPIIKAYQDYDQVLSDQSEAKYMMTESDPELAAMAEEELALCNSRLPTLEAALQVLLLPKDPRDSCNTFLEIRAGTGGDEAAIFAGDLFRMYSRYAEKQGWKIEIISVNDGEHGGYKEIITRVVGNEVYGCLKFESGAHRVQRVPETESQGRIHTSACTVAIMPEPDEQEAINIRKEDLRIDTYRSSGAGGQHVNTTDSAIRITHLSTGIVVECQDERSQHKNKAKAMTLLAAKLQDAQDAAAAKEISSTRKTLVGSGDRSERIRTYNYPQGRVTDHRINLTLYKLTEIMEGDLNPVIQPLLQEHQTELLAGLADENA
77	MAG14_104	MAG14_104_77	1310	22	10	41	7	17	7	13	44	12	1	0	0	4	9	0	187	Glutamyl-tRNA reductase (EC 1.2.1.70)	atggggtatcttactactgggatcaaccacactacagcaccagtgagcctgagggagaaggtcgctttttctcgagatcagcttgctgatgcgttgcagcaggcttgtcgttatatccaaataagggaaattgtcatcctgtctacctgcaatcgaacagagctctattgcccagacacagtcgctgcaactaaagtgttgcagtggttaactgactatcatcatgtgagcctagatgaggtttcagcacacgcttatgtttaccgtaatactgatgctattcggcatataatgcgtgtagcctgcgggcttgactcaatgatattaggtgagcctcaaatactcgggcaattaaagtcagcctattttcaagcacaagcagtgggcacaacaggcata…	MGYLTTGINHTTAPVSLREKVAFSRDQLADALQQACRYIQIREIVILSTCNRTELYCPDTVAATKVLQWLTDYHHVSLDEVSAHAYVYRNTDAIRHIMRVACGLDSMILGEPQILGQLKSAYFQAQAVGTTGILLNRLFQQSFATAKQVRSQTTIGKLPVSVAYAATHLAKQIFTDLSKNTALLIGAGKTVQLVARHLKQQGLDDIIIANRTLEKAKRLTDELGGQPILLSALPVVIKQADIVITSTASQTPVLGKGCVEKALKARKHRPIFMVDIAVPRDIEPEVEELPDVFLYTVDDLHNVIEGNLQQRKASVELAEALIEASLTDFMTQMRSLDAVNLLRSYRQKSEHLRKQEVQRAMQELSRGVSPESVLNRMASALTNKMTHTPSIQLKKAAAS…
78	MAG14_104	MAG14_104_78	113	0	0	3	0	6	0	0	0	0	0	0	0	0	0	0	9	hypothetical protein	atggaatgcctgcaactgcaaactctgttcgagtatgttgatgacagtggcattatttttctgattttagcggggtgtgttattaacttacttaatagggcaaggcgcttatga	MECLQLQTLFEYVDDSGIIFLILAGCVINLLNRARRL
79	MAG14_104	MAG14_104_79	1769	2	0	16	4	5	14	13	33	6	0	0	0	0	4	0	97	hypothetical protein	atgaacaagcactttttaatcttggtgctttgttttatatcgcttttacaggggtgtgccatgtggcaggcacctgaaaaagacttaactgccgagatcaaaaaacagaaaaaacaagaagatacctatatctcttttgagcccgagacagtttacgaccttctggtggctgagctaggcggtcagcgtcaacgttatgatcttgcccttggcaattatttaaagcaggcacatcaaacccgtgatgttggtgtggcaaagcgtgcctatcaagtagctacctttgtcaatgccaaacaggcagcactggatgcggccatgttatgggtggcgttagcacctgatgatatcaatgccttgcgtgccagtgcatttgagctgatgcaaaataatcattgg…	MNKHFLILVLCFISLLQGCAMWQAPEKDLTAEIKKQKKQEDTYISFEPETVYDLLVAELGGQRQRYDLALGNYLKQAHQTRDVGVAKRAYQVATFVNAKQAALDAAMLWVALAPDDINALRASAFELMQNNHWEQAIKRMDQLLVYDQGVDLEDMAHYAKGLSEVNKNNVSAAFSRAIIAYPQNYSLSLAKITLLMQLKQYQKALVICNKLIKKQAELVKALALKGRLLSKMGRTVEAETVLEGGITQYPEQTFLRLLYARVLIGNNKLDQAYSQFRVLLQQSPDNAEVILSLGLISMDLGKEQKAENYLHRLLATGKSPNTAHFYLGKLYETQQRWADAKRYYSAVIPGEEFLMAQATMTKMLENTGQWLEAREQLKSARKHYPEQAANLFLLEGDAL…
80	MAG14_104	MAG14_104_80	644	2	0	12	1	6	15	12	16	15	0	0	0	1	2	0	82	hypothetical protein	gtgagaaaaatgttatcaacgccatcgtaccttgtttttagctttcgattggctggtttttttcttgtcttgctattagcagggtgtagcatgtttgcacaaaaacctcctgctttaactgatgcagagaaaaaactacactggaatgctttgcaaaagcagttagtcgctatcgatgactggcagttttcggcgcgtgttgggctcaatattccaaggcatcctggctcagtgtcactgaattggacacagcaacaacatgcctacacattactcgttcaggggttgtttggacaagctattgctgagatcaagggcggccgctatggtgttactgctaacgtaactggagtagataagcctttgactgctagctatcctgagcaggttatacaggcc…	MRKMLSTPSYLVFSFRLAGFFLVLLLAGCSMFAQKPPALTDAEKKLHWNALQKQLVAIDDWQFSARVGLNIPRHPGSVSLNWTQQQHAYTLLVQGLFGQAIAEIKGGRYGVTANVTGVDKPLTASYPEQVIQAITGWSLPVSGLQYWVKGVPVPDTVANVTLNGQGQAASIFQQGWHITYTDYRDVDKVVLPYRVTLSRGDIKVRFFISHWQLS
81	MAG14_104	MAG14_104_81	860	25	32	67	29	22	93	27	112	25	6	0	0	3	33	0	475	4-diphosphocytidyl-2-C-methyl-D-erythritol kinase (EC 2.7.1.148)	atgtattcaattgatagacttgtattacccgcgcctgcaaaaattaatcgtttcctccatattacagggcggcgagcagatggctaccatcaattacagacgttgctccaattcctagattatggtgatgagctgattattacgccccatagtcaactcatgcttgatactgcttcagctgaactcagatcagaaaataacctgattcttcaagcagctcggctattacagcaaacggctggctgtacgcaaggggcgcatataacactgaataaaaaattacctgtaggcggcggtctcggaggaggcagttctaatgcagcaaccgcattacttggattaaacatagtctggcaactaggattgcagcaagaccagcttgctgcactaggcttaatg…	MYSIDRLVLPAPAKINRFLHITGRRADGYHQLQTLLQFLDYGDELIITPHSQLMLDTASAELRSENNLILQAARLLQQTAGCTQGAHITLNKKLPVGGGLGGGSSNAATALLGLNIVWQLGLQQDQLAALGLMLGADVPFFVHGCSAFAEGIGEQLVYMEPSEPWYVVLIPSISISTAAMYGHEDLTRDTSPITVCSANDHKGTNDFEPLVRRLYPEVDSCLTMMDDFDHLSMGSAMLSGSGACVFKPFASQEAANSVLAALNAEANGFIARGINRSPLHSLLCEH
82	MAG14_104	MAG14_104_82	941	16	19	42	26	12	75	24	93	8	0	0	0	4	54	0	373	Ribose-phosphate pyrophosphokinase (EC 2.7.6.1)	gtgtcaaaaatgatggtgtttgccggtaactccaatccggatctggtacataaagttgttaatcagctgcatatcccgctgggtaaggcatacattggtaggtttagcgatggagaggtagccgttgagattcaagaaaatgttcgtggtcgtgatgtttttatcattcagtctacctgtgcaccgactaacgataatctaatggagctactagtcatggctgatgccgtgcgccgctcttctgctgttcgagttaccgctgtgctgccttactttggttatgcccgccaagatcgtcgtcctcgctccagccgagtacctatcagcgctaaagtcgttgcggatatgattgcaagtgttggtgttgaccgcgtgttaacggtcgatctgcatgcagat…	MSKMMVFAGNSNPDLVHKVVNQLHIPLGKAYIGRFSDGEVAVEIQENVRGRDVFIIQSTCAPTNDNLMELLVMADAVRRSSAVRVTAVLPYFGYARQDRRPRSSRVPISAKVVADMIASVGVDRVLTVDLHADQIQGFFDIPVDNIYGSPILLGDIERQNYENPIVVSPDHGGVVRARAVAKRLNCDLAIIDKRRPEANKIEVMNIIGDVSGRTCILVDDMVDTAGTLCQAASALKGKGAEKVYSYCTHPVLSGRALENIENSTLDALVVTDTIPLSPAAQALGKIRQLDMSPLLAESVRRISNAESISAMFQ
83	MAG14_104	MAG14_104_83	638	24	40	62	40	26	154	87	148	53	4	0	0	3	65	0	707	LSU ribosomal protein L25p	atgtctgaagcaattgtattaagtgcagaagcacgtaaagacgtagggaaaggtgcgagccgccgcctgcgtcgtgctgatctggtacctgccattatctacggtggggaagaagatcctgtacaagtaacattggccggaaaaaccattcgtaaggtgctggagagtgaagctttttactcacaggtattgacattggttattgagggtaaagaaaagcaggttattcttaaagatatccaacgccatccagctaaagaatttgcgatgcatatggattttttgcgagtaagcaaaactcaggcgatcaccacgcacgtgcctcttcacttcttgaacgaagacatttgtaaaggcgttaaagatcaaggtggtgctattacccatgcacgtgtagaa…	MSEAIVLSAEARKDVGKGASRRLRRADLVPAIIYGGEEDPVQVTLAGKTIRKVLESEAFYSQVLTLVIEGKEKQVILKDIQRHPAKEFAMHMDFLRVSKTQAITTHVPLHFLNEDICKGVKDQGGAITHARVEVEIRCLPGDLPEFIEVDMAELALGEHVHLSDLSLPKGVELVSMLHGDGHDLDVASVQATRATTEEDESEAAAPAQKNDE
84	MAG14_104	MAG14_104_84	602	2	8	21	5	2	18	12	24	14	0	0	0	2	6	0	114	Peptidyl-tRNA hydrolase (EC 3.1.1.29)	atggtaaaagatgctcaggggtatgctattcagttgattgttggactgggaaaccccggagctcaatatgaagaaacccgccataatgcgggtttctggtttgtagaacaattagctcgtgcttacggcggcaaattgcaggcggaaaaaaagttctttggcctaactgctcgcattaacattgacaggcacaatgttcgtctgcttaagccatcgacttttatgaaccgtagcggtcaggcagttggtgccatgagcacattttataaaatccctcccgaatctattcttattgttcatgatgagttagaccttccccccggcattggtcgtttaaagcaaggtggtggtcatggtggccataatggcctacgtgatattattgcggcccttggcaac…	MVKDAQGYAIQLIVGLGNPGAQYEETRHNAGFWFVEQLARAYGGKLQAEKKFFGLTARINIDRHNVRLLKPSTFMNRSGQAVGAMSTFYKIPPESILIVHDELDLPPGIGRLKQGGGHGGHNGLRDIIAALGNCKNFQRLRIGIGHPGNSKEVVNYVLKKPSIADKQRMNAIINESIRITPELLNGSRQKAVQTLHTFSG
85	MAG14_104	MAG14_104_85	1253	27	21	63	19	14	24	28	48	26	0	0	0	2	10	0	282	Tryptophan-specific transport protein	atgtctgaaaccgtatcgaacgaaccagcaaaggccaaactaaaaactgtgtttggtggtgcttttattattgctggaacagctgtgggtgcaggtatgttttctatgccggtagctaccagcggtatgtggtttggcccctctctgctcatgttgtgttttgtttggtattgcatgtatagcgctgcattgtatttacttgaagctaatatgcgctttcccctaggtgcaagctttgacactattgcacaaggcaccataggtaatacaggacgaatcattaatggcgcttcaattggttttgtttgttacattttaacctatgcttacatctctggtggtagctctgtcactcgctatacgattcactctgtagcaaatattatggtatcgccgtca…	MSETVSNEPAKAKLKTVFGGAFIIAGTAVGAGMFSMPVATSGMWFGPSLLMLCFVWYCMYSAALYLLEANMRFPLGASFDTIAQGTIGNTGRIINGASIGFVCYILTYAYISGGSSVTRYTIHSVANIMVSPSLASLIFAVVLGTIVVFGARAVDRVTTVLIGGMVISFLTFTGGLLDHVQPKLLFPTLSASDTLPYSFAALSFVTVSFGFQNCVPSITCYLKKDALAIKKSILWGSLITLGFYMIWQLSIFGNLSRNQFPALIAQGGNIASLVSAVEAKGLNLSISRVLELFSNMAVASSFLGVSLSLFDFIADLFGFGKDLKGRLKTAVITFAPPTCLGILLPNGFITAIVFAGVAMVVFCILTPVMMAWVGRQKNPAGYQVPGGKPRMLLVVIFGL…
86	MAG14_105	MAG14_105_86	89	6	2	0	0	0	3	3	2	0	0	0	0	0	1	0	17	hypothetical protein	atgatcagccagtcagaactcgtgaatttagaggatcttgttgccgcagatcatccctatcgagtttataaagaactgctcgactttgaa	MISQSELVNLEDLVAADHPYRVYKELLDFE
87	MAG14_105	MAG14_105_87	164	0	0	2	0	2	1	0	1	0	0	0	0	0	0	0	6	hypothetical protein	ttgaaaatattttatcaaaaaaacagcttccttttaagttatgcaacagccccactcactcggttttcttgcactttgagcaagctacttcaaactgccatccgagcccaagcagaaatcaagaatattatcattaaaatgattagcaactattatgatgcataa	MKIFYQKNSFLLSYATAPLTRFSCTLSKLLQTAIRAQAEIKNIIIKMISNYYDA
88	MAG14_105	MAG14_105_88	1754	6	2	10	2	6	15	6	31	8	0	0	0	0	6	0	92	hypothetical protein	atggcaatgatacaatcaataatgacatttcgcagattggctcaggtattaatcggctggctatttttgcttgctatgcctgtttatgcaacgcttacggcttctgttgataaaacagatatagccgcctatgaaacagtaacactgactcttcggttagatgataataattctggtacgccagaattgaatcaactttataatgaatttgatattctgagcacgaataaaagccgtcaggtgcaaattattaatggacatactcaatcatggcatgactgggtcattacgctatctcctaaaaaggtaggctctcttgtaattccggctattcaaattggcaatgaaaaatcggctcccatcacgattactgtcacaaaaaataaaagtaaaacaagt…	MAMIQSIMTFRRLAQVLIGWLFLLAMPVYATLTASVDKTDIAAYETVTLTLRLDDNNSGTPELNQLYNEFDILSTNKSRQVQIINGHTQSWHDWVITLSPKKVGSLVIPAIQIGNEKSAPITITVTKNKSKTSSSAAGRISPVFIREEVDNKNVYIQQPIHLTLKIFHSVAPLENSRLSPLEINDAIVNQLGDIKKYETVIDGIRYGVFELQFVIYPQKAGTLIIPSLSFTGMIPSRRDPFGSFFAMDGKPIVARSQKIITHVEAPPANYPGNTWLPAKRLTLHQMWSQPIDSIKVGDAVTRTITMEAEGLNAAQLPSLDIPSPDGINTYPDKSSTHDVETAKGIVGKRISAIAMVPTKAGIFRLPPVKITWFDTLQKKTRVAEIPETTIDVQPATHSA…
89	MAG14_105	MAG14_105_89	167	1	0	2	0	0	0	0	2	0	0	0	0	0	1	0	6	Aerotolerance protein BatB / Aerotolerance protein BatC	atgactgagactaaaactaaaacaaatgattcacaaaggctcaaacagcaggctgtggatagttggcttcgtactattccagatgatcctggtggcttgttaaggcgaaaatttttataccaacgtgaacaagagttgagagagcgccaaaggcagacatggcaatga	MTETKTKTNDSQRLKQQAVDSWLRTIPDDPGGLLRRKFLYQREQELRERQRQTWQ
90	MAG14_105	MAG14_105_90	416	0	1	0	0	1	0	2	2	2	0	0	0	0	0	0	8	hypothetical protein	ttgcttgacttttttgcggatgttcgttgtttaaacggtattgctcgtcttgcttaccctgtttatcttgttgattatttttctgattctgactgttctggtcttgctgattttgctgattttgctgattttgctgattttgctgattttgctgattttgctgatcttgttgatcttgctgatcttgttgatcttgttgatcttgttgatcttgttgatcttgttgatcttgttgatcttgttgatcttgttgatcttgttgatcttgttgatcttgttgatcttgttgatcttgttgatcttgttgatnnnnnnnnnnnnnnnnnnnnnnnnnnnnnnnnnnnnnnnnnnnnnnnnnnnnnnnnnnnnnnnnnnnnnnnnnnnnnnnnnnnnnnnnnn…	MLDFFADVRCLNGIARLAYPVYLVDYFSDSDCSGLADFADFADFADFADFADFADLVDLADLVDLVDLVDLVDLVDLVDLVDLVDLVDLVDLVDLVDLVDLVDXXXXXXXXXXXXXXXXXXXXXXXXXXXXXXXXXXC
91	MAG14_105	MAG14_105_91	1025	4	4	20	2	6	16	6	27	4	2	0	0	1	4	0	96	Aerotolerance protein BatA	atgcttgaactggaatggccttggatatttttagccttaccggccccgctacttatatactggctggtaccacccgctacgcctatcaacgaacaggccttgcgcgtacctttttatcgagacgtaattggtacaaccaccgctggcactgttgatgttgataaaaatagccggtttcacttgtttgcactttggctcgtatggttactattattactcgctggtagtcaacccaaatggctgggtgaccctgtacaattaaaagactctggacgtgatttaatgttggctgttgatctttccggcagtatggaaattccggatatgaaaattgaaaataaagaagttaatcgactgacagctattaaatatgtgttatctgattttattaaacgccgc…	MLELEWPWIFLALPAPLLIYWLVPPATPINEQALRVPFYRDVIGTTTAGTVDVDKNSRFHLFALWLVWLLLLLAGSQPKWLGDPVQLKDSGRDLMLAVDLSGSMEIPDMKIENKEVNRLTAIKYVLSDFIKRRRGDRLGLILFGTQAYLQTPLTFDLKTVKTLLDESSIGMAGGKTAIGDAIGLAVKHLRNRPEHSRVLILLTDGANTAGQVTPIQAAKLAQEEHIKIYTIGIGADEMIQPGLFGSSFGARKVNPSADLDEKTLTEIAQLTGGRYFRARNTNELNQIYALLDQLEPIDQAEETFRPSKSLYPWPLSLAFIITILMACSRLIPISTHIGRRF
92	MAG14_105	MAG14_105_92	476	0	0	0	0	0	1	0	6	2	0	0	0	0	0	0	9	hypothetical protein	atggatcaacaggttattctaggtcagcttcgcgcgaaccaccttccagaggcagtagggtattggcctctagctattggatggtgggtactcgcaggttgtttgctgacctttattatattggtcttttatttttctttgcgttattggcggaaaaatcgctatcgttaccaagggctcaaactcgctcaaaaaatctataaaagctatgagcagcacggtaacgaccgacaatatgctcatgactgcaaccggctattaaaaaaactcgctctgcatgtttttatacgtcaagatattgccagcctcaatggcaaagattggcttgagtttctctactgttcatccggcaacgagcagtttaagcagccagcggcagctgctcttggttctagccgt…	MDQQVILGQLRANHLPEAVGYWPLAIGWWVLAGCLLTFIILVFYFSLRYWRKNRYRYQGLKLAQKIYKSYEQHGNDRQYAHDCNRLLKKLALHVFIRQDIASLNGKDWLEFLYCSSGNEQFKQPAAAALGSSRFNPDEEPDVTQLHPLIISWIKKHHA
93	MAG14_105	MAG14_105_93	938	0	0	2	2	0	11	4	30	5	0	0	0	0	6	0	60	hypothetical protein PA3071	atgagtggcatttatgctgaattgacggaactaatacaattgcgcctgaaggccagaaatcttcaattgtttcagagtatttctgcaaaaagtcagctctcaggcggcatcttatcgcccttcaagggcagaggaatgaattttgaagaagtgcgtgcttaccaagcaggtgatgatatacgcactattgactggcgggtaactgcgcggcgctctaagccccatactaagatttttagggaagaacgagagcgccctgtgatgattatactagatcaaagccactcattgttttttggtagtaagctgaattttaaatcagtaactgcctgtgaaacagcagcattactggcgtggggcacattattgcatggtgatcgtatcggtgggattattttc…	MSGIYAELTELIQLRLKARNLQLFQSISAKSQLSGGILSPFKGRGMNFEEVRAYQAGDDIRTIDWRVTARRSKPHTKIFREERERPVMIILDQSHSLFFGSKLNFKSVTACETAALLAWGTLLHGDRIGGIIFNEIDHYNIRPKSAKTALMHFLKKAEKLNKQLQIKSMPTQQNQGYLANSLRHARRVAHPGTQLFIISDFRDMDSEALRQLAKLKRHCEIMAFQITDPLEQELPEPSCYVITNGIHRYTLDTRQRAHRQAFREQQFAQYQLLEKQLIQYRIPLIRLSSEEDTAEQLLLLFSSKSRPLLKRD
94	MAG14_105	MAG14_105_94	992	4	4	14	6	5	19	9	40	9	0	0	0	2	2	0	140	MoxR-like ATPase in aerotolerance operon	atgtacattaatgctgatgatcatttttttatgcctactagcaatacactaagccatcttagagactacctttctacctgtattattggtcaggaacaactggtcaaccgcctattaattgcattattggctgacggtcatctgttagttgaaggcgctcctggacttgcaaaaacaagagcaataaaagcacttgctgaaggtcttgatggtaactttcaccgtattcaatttactcctgatttattacctgctgatgttacaggtaccgatatatatactcctgaagacagtagttttcgttttcagccaggccctatttttcataacctgttattggcggatgaaatcaaccgcgctccggctaaagtacaatctgccttattagaggcgatggca…	MYINADDHFFMPTSNTLSHLRDYLSTCIIGQEQLVNRLLIALLADGHLLVEGAPGLAKTRAIKALAEGLDGNFHRIQFTPDLLPADVTGTDIYTPEDSSFRFQPGPIFHNLLLADEINRAPAKVQSALLEAMAERQVSVGSKTYPLPKIFMVMATQNPIEQEGTYPLPEAQLDRFLMHVKVDYPSVSAEKKILQLARGEAMKQPPITLDEQISQAHILAARQEVLGVHMEPVVEEYIVQLINATRTPTTYHPKLGGWLEYGASPRGTIALDRCARAHAWLQGRNYVNPDDVQAIAHDVLRHRLIVSFEAESDGKSPDQIIDLLLKVVPVA
95	MAG14_105	MAG14_105_95	116	0	0	2	1	2	2	1	4	1	0	0	0	0	0	0	13	hypothetical protein	gtgtcaaaaattaataaaattagtggtaaagcttgcagtattagcggtatctcgtctatttttccaagcttgagcattttaatcagtgctcaaacggctgccttgtgtatcacataa	MSKINKISGKACSISGISSIFPSLSILISAQTAALCIT
96	MAG14_105	MAG14_105_96	122	0	0	1	0	0	0	0	0	0	0	0	0	0	0	0	1	hypothetical protein	gtgcaaaaaatagtctcccttattctcaaggtagactattgggctttagaaacctatattattctgcctacttattttatctttattcagaaatatgaacggaactacggtgtcaaaaattaa	MQKIVSLILKVDYWALETYIILPTYFIFIQKYERNYGVKN
97	MAG14_105	MAG14_105_97	4823	36	16	76	26	10	40	26	83	12	0	0	0	2	18	0	345	NAD-specific glutamate dehydrogenase (EC 1.4.1.2), large form	atggggcacttggaaaccagtgaacgtcaggaagcccttgacagattattaaacgaattaagtcaacaaagcataccagaatattttaacgaccttaaaaattttgtattccgcttttatgccatggacacccgccaagatttattaggtggtgaacgacgagagctactggggtcaacactttctttttggcaatttatggaacaccatgatttaagccaacctaaaatagaagtctttaacccgacgcactctcttcatggctggcactcaactcattctgttattcgtatattgcacagagatatgccgtttttggttgattctgtaaggatgaaactcaatgagcatggctctgctgttcatttgattagaaatggtactgtgctctgccagcgt…	MGHLETSERQEALDRLLNELSQQSIPEYFNDLKNFVFRFYAMDTRQDLLGGERRELLGSTLSFWQFMEHHDLSQPKIEVFNPTHSLHGWHSTHSVIRILHRDMPFLVDSVRMKLNEHGSAVHLIRNGTVLCQRNTAHKRIVMNDQKSCIREAFIYVEIDRIEEDTELTKLQQQLSGVLTDVVSVVEDFQEIKSKVSNLMEAMEQTDNSEVHDFLAWLLSDHFTFIGFEELKVIERGDKRRLVRPSDSRLGLLRSMHQGGLSQEQLDPFADRDFFHNKKILSFSKAAVRSSVHRPAYPDFISVRQFDMQGQVISESRIVGLYTSPVYRHSPQKIPFIKHKVSSIIKRANLEPGSHHGKDLSQILEIFPRDELFQMEENQLYETVMAILRIQERKQVKIFI…
98	MAG14_105	MAG14_105_98	596	0	2	11	0	2	6	4	11	4	0	0	0	2	0	0	42	hypothetical protein	atgggaagatcaacctctttcgcccgttctaacgtcctagaaagtgctcttagcttattttggctaagagggttttctgctgcctctctacgccagctagaaaatacgacgggtctcaatccagggagtatttattatcacttcaccaataaagaacaattatttttagctgttttgcagcactatattgacagccatcttcatatgcgcattaataaaaacctgtcttcaggtgatcctataacagggctaagacgattcatcacatccggttaccggaatagtcaggaaaatatatatcgtaactgctgtttccttgccagcacttgctcagacctttgtcatttaccaccactcgctgccgaacttatcaacaatggtttaggcagtatcctgtct…	MGRSTSFARSNVLESALSLFWLRGFSAASLRQLENTTGLNPGSIYYHFTNKEQLFLAVLQHYIDSHLHMRINKNLSSGDPITGLRRFITSGYRNSQENIYRNCCFLASTCSDLCHLPPLAAELINNGLGSILSGFKRQLARALKNELIRVQAPLDELAEELLHLYLSLQLLAKARPNQQQLDAIVNRSLKTLLQPKSQ
99	MAG14_105	MAG14_105_99	1004	10	11	23	4	6	12	25	37	20	0	0	0	0	10	0	180	Uncharacterized protein VC2323	atggcatcaatacaacaaatgagtaccaataatcataaaaaacctacgggcttcattggcctattggaacaggtccctacgccactgggtggcttggctttgagcattgcgggccttggcgcagcttgggctcaggtaataccagcattagcaacacccctggaacttatcacagctttaacagctacggtgctaattttaaaaattattttaaaatttttattccatccgcagctgataaagaaagagcttacacatcccgtaataggtagtgtaatgccagccagcatgatggcaaccatggtgatttcatcgtcattgctgccttggctgggtgagtttgccaaggtactttggttagcagcgaccatttgccatattattctttttatgattttt…	MASIQQMSTNNHKKPTGFIGLLEQVPTPLGGLALSIAGLGAAWAQVIPALATPLELITALTATVLILKIILKFLFHPQLIKKELTHPVIGSVMPASMMATMVISSSLLPWLGEFAKVLWLAATICHIILFMIFAYYRAREFQLEHMVPSWFIPSVGIIVATVTSQGMGHDQWAYSLFIFGLTCYFIKLPAMLYRLIFRDVLPVTALPTFAIMAAPASLSLAGYLTISKYPNPLLILILAQIAIFMTFLVYLAFLRLLRLPFSPGYAAFTFPMVIGATALIKLTIWLQTEQHLWLAELVKHLSHIELVVATVMVVYVALHYFFFYLLKPLFRKKH
100	MAG14_105	MAG14_105_100	1937	10	8	17	2	8	11	7	27	13	0	0	0	0	0	0	103	hypothetical protein	gtggacaatagcacttactctctacgacttaatcggttaaaagagagctattttactaaaaataagcttgctttatttaaattgacttcactactttggtctgtgctagcgggaatgctaatactcactgaagacacttatggtgctgaaaatgtacataaatcccatggtatctctcgctttgatcatctgaaatatccaccagattttaagcattttgactatgtaaaccctgatgctccaaaaggcgggtctattcgcttatttgctcagggtacatttgattccatgaacccatatggcatatcaggagttaccccagcccagtcgccaacctttaactttatgaagtatgggttcacagagtttaatgaaccattaatggtagggtcaggtaac…	MDNSTYSLRLNRLKESYFTKNKLALFKLTSLLWSVLAGMLILTEDTYGAENVHKSHGISRFDHLKYPPDFKHFDYVNPDAPKGGSIRLFAQGTFDSMNPYGISGVTPAQSPTFNFMKYGFTEFNEPLMVGSGNYSPSGDEISAAYGLIAQSAEYPDNNQWVIFNLRPEARFHDHHPITADDVVFSFNELRKKGHPRYKMQLEPIAAVEKLNSHRIKFTFKEPGHRGQLLRAAELPVLPQHYWQNKAIEKTTFTPPLNSGPYQVTDVKQGQSITFTRVKDYWGKDLAVNKGRYNFDQVTIYFYRDLHAAFEAFKAGGHDIHLEIIAKNWATAYDFSAIKSGHIKKKEIPHQMAYGSSFFFFNTRRALFKDELVRRALSLMMDFQWTNHVIFHNSYNRSSS…
101	MAG14_105	MAG14_105_101	206	27	11	56	27	22	40	41	94	18	6	0	0	2	70	0	414	Cold shock protein of CSP family	atgtctactgttaccggtaccgttaagtggttcagcgacgagaaaggttttggatttatcgctcaagaaaatggccctgatgtatttgcccatttccgtcaaattaaatctgagggtttccgtaccctgactgaaggccagcgtgttgagtttacgattactcaagggcaaaaagggcctcaggctgaaaatattattcctttgtaa	MSTVTGTVKWFSDEKGFGFIAQENGPDVFAHFRQIKSEGFRTLTEGQRVEFTITQGQKGPQAENIIPL
102	MAG14_105	MAG14_105_102	584	6	8	2	2	4	18	12	19	2	0	0	0	0	9	0	82	DNA-3-methyladenine glycosylase (EC 3.2.2.20)	atgatgaagcaacgttgttcttggtgtttaagtgaccctttgtatattagctatcatgatgacgaatggggtcgaccttgccatgatgaccataagctatttgaatttcttcttctcgaaggagctcaagcaggtcttagttggttgataatcttaaaaaaaagagaaggctaccgaaaagccttttgtcagtttgatgctgaaaaagtggctcggtttaatgctaatgatattgagcgattaatgaaaaacccagctattattcgaaaccaccttaaaataaaaagcgctataaaaaatgcccaggctttccttaagcttcaagaacagcacaacggttttcataacttcctctggcagtttgttgatggttgcccgattatgcgccaaccaaaaacg…	MMKQRCSWCLSDPLYISYHDDEWGRPCHDDHKLFEFLLLEGAQAGLSWLIILKKREGYRKAFCQFDAEKVARFNANDIERLMKNPAIIRNHLKIKSAIKNAQAFLKLQEQHNGFHNFLWQFVDGCPIMRQPKTLSAIPASTPESDQLSKALKKAGCSFFGSITCYAYMQAMGLVNDHISQCFCVSEKCKTSISI
103	MAG14_105	MAG14_105_103	137	3	3	4	1	3	0	2	1	0	0	0	0	0	0	0	17	hypothetical protein	ttgccttttaagatattacatcttgcattttgggtgcatttgggttttaagctatgcaatagtgcgattatgttaagaatagtagctgcttaccctgcatcatcatctgatgacactattgatggagtaatacgataa	MPFKILHLAFWVHLGFKLCNSAIMLRIVAAYPASSSDDTIDGVIR
104	MAG14_105	MAG14_105_104	461	29	20	106	21	32	104	40	120	41	4	0	0	6	22	0	545	FKBP-type peptidyl-prolyl cis-trans isomerase SlyD (EC 5.2.1.8)	atgaaaattgcagacaacaaagttgttctaatgcattatatcttgaaaaataaagcaggtgagctaattgatagctctgaaggtcatgagccgctcgcttatatacatggtattggcaatattgtacaaggtctagaaaaagccctaacaggcaagcaggtaggcgacaaggtcgaggtcagcgtagaagctgctgaggcttatggtgaatatgatgaagagttagtgcagccagttcctcgtgctgattttgaaggtcacccgatagaaacgggaagccagttccatgctgatacggctgttggccctcgcattgtcacagttactgcaattgatgatgatcagattattgttgatgctaatcacccactagcgggcgaagatttacattttaaagta…	MKIADNKVVLMHYILKNKAGELIDSSEGHEPLAYIHGIGNIVQGLEKALTGKQVGDKVEVSVEAAEAYGEYDEELVQPVPRADFEGHPIETGSQFHADTAVGPRIVTVTAIDDDQIIVDANHPLAGEDLHFKVEIVDVRNATKDELEHGHVHE
105	MAG14_105	MAG14_105_105	1406	18	11	24	7	10	28	35	60	20	0	0	0	0	8	0	280	Signal recognition particle protein Ffh	atgtttgagaatttaactgagcgcctgtcacatacattaaaaagcgtaacaggcaaggctaagcttagcgaagaaaatataaaagaaacgctccgagaagtgcgtatggcactattggaggcggatgtcgctctcccagttgtccgtgagtttatcaaacgcatcaaggaaaaagcggtaggccagtcagtgcaagtgagccttaacccaggacaaacctttgtcaaaattgttcaaaatgaactgatcgaggtgatgggctctaccaatgacgaattgaaccttgctacccaacctcctgcaattatcttgatggcaggacttcaaggtgcaggtaagacaacctctgcggttaaactgggtaaatggctaaaagaacgccagaaaaaatcggttatg…	MFENLTERLSHTLKSVTGKAKLSEENIKETLREVRMALLEADVALPVVREFIKRIKEKAVGQSVQVSLNPGQTFVKIVQNELIEVMGSTNDELNLATQPPAIILMAGLQGAGKTTSAVKLGKWLKERQKKSVMVVSADVYRPAAIKQLETLANETGLHFFPSYTDQKPVDIVSRAIRETKIKHADVLIVDTAGRLHIDEQMMDEIKQLHHATNPIETLFVVDAMTGQDAANTAKVFNDALPLTGVVLTKADGDARGGAALSVRHITGKPIKFMGTGEKIDALESFYPDRIASRILGMGDVLSLIEEAELKLDKKKADKLAKKLKKGKGFDLEDFRDQLQQMKKMGGLSGVMDKLPGMGGMSQQMPGQMDNKVFAQMEAIINSMTRKERANPDIMNGSRK…
106	MAG14_105	MAG14_105_106	1829	0	8	14	0	0	4	3	13	9	2	0	0	2	2	0	57	ABC transporter, substrate-binding protein (cluster 5, nickel/peptides/opines)	ttgaaccttttacacgttagcatgcatataaaaataaagcctagacagttttcactttcttttttcctactggtgatttctgggttgctgtatgcaaaagatacagcaaaagtcatcacacaggagagcttttctttaattggggagcccgcttatcctgaagattttaagcattttatttacgtaaatcctgatgcaccaaaaggtggtgtcttgaggctggcggctattggtacttatgatacgctaaatccttatagcgctataggtcggccgccggaaggtatctatatgatacatgaccgactcatgacccgatcagtcgatgaacctgttactttataccctgtaatagcaaaaaatattcaatatccaagtgatttgcaatgggtagcattt…	MNLLHVSMHIKIKPRQFSLSFFLLVISGLLYAKDTAKVITQESFSLIGEPAYPEDFKHFIYVNPDAPKGGVLRLAAIGTYDTLNPYSAIGRPPEGIYMIHDRLMTRSVDEPVTLYPVIAKNIQYPSDLQWVAFDLNPQARFHDDKPVTAEDVVFTFNLLKTSGSAFIKNNYRDVLSAKADGAHRVIFQLGAGRGIRLLAFIAFMPVMAKHFWQGRSFDAGLTQLPVGSGPMKISKIKLGRSIVYERVKNYWGADLPTHKGLYNFDTVKIDYYRDNHASIEAFRAGLYDFRYEFDVKAWRQNYNFSAAKKAQVIKETAPFIHPPGMKAFVFNTRKALFKDRQVRMALLELFDFEWINKHFLYSEYQRTTSFFENTPLKAQGLPSPEELNILEPFRKVLPA…
107	MAG14_105	MAG14_105_107	1259	0	0	10	4	2	3	2	7	0	0	0	0	2	0	0	30	hypothetical protein	atgaataacaagttgttttatagactattttttttgttcatcccgcttattttttttaaaagttcgatggcattatcttctagttttaatgtctatgtggttcagcaaaatgataatctcaaattgattgcagagcagctagacagtcaaccgtgtgataaagaacctattaccgcctcattaaacattgcagataacagtagttattttggtcatattacaaatagtatttgtaagaattcgtttcagtatctatttcttgaagggtggggaaaactaaaatcaaaaatagagggaaagacgcaagatcatgatattaatataaataatttggttataggttttgctggttattcttaccagtttaggcaagatcgtgatggggaagaaagacagaag…	MNNKLFYRLFFLFIPLIFFKSSMALSSSFNVYVVQQNDNLKLIAEQLDSQPCDKEPITASLNIADNSSYFGHITNSICKNSFQYLFLEGWGKLKSKIEGKTQDHDININNLVIGFAGYSYQFRQDRDGEERQKSEDKFNNFKQVVSLNVGVKKANIQFMDDAKIVGLSALRYHEHDHGKGNIVYVIHATTMGQLLKVTKKNGKESINREEVDSIDGIEGGRFEIGERVRSELFQEDGIRENQGIETSMLPLKNMLLKYPCIATHLNNASFDSRFAMGMEKKLVPKNILGSYVQKISCGIKPNPNNFPSSLNDQWASAQSVAESKQEIAEKNLIKLVNEAIEKAKQEECLPVYVFSNDYYPDEASDKSLKYAARGYFKYNEVVFIEGKEAVDAVLLAGKK…
108	MAG14_105	MAG14_105_108	818	4	6	10	1	2	7	6	15	8	0	0	0	0	5	0	64	Thiosulfate sulfurtransferase, rhodanese (EC 2.8.1.1)	atgcttactttaaatgaattcgttattgaaagcgctcagcccaaccaacgacacgataaaaaaataaaaaatgaactaattattggtacaacccaacgccgactataccatcaatgccatattccaactgctgtcaatattgcaccagaggagctggtagcaaatataccaccagccacaggcaagctaccctcacttaatcagctagaagcgttgttttcccgcttaggctatttaggcaaagatcagcatttaattatttacgacgatgaaggtggaggctgggccgggcgttttatatggacactggatatgataggccacagtaactacagctacataaatggaggtctgcatgcctggatagcagctggtttgccattagaaagcggtgaaaat…	MLTLNEFVIESAQPNQRHDKKIKNELIIGTTQRRLYHQCHIPTAVNIAPEELVANIPPATGKLPSLNQLEALFSRLGYLGKDQHLIIYDDEGGGWAGRFIWTLDMIGHSNYSYINGGLHAWIAAGLPLESGENTPEPTQVMLTLHNSARASRDYIEANLNSPDTVIWDARSPAEYCGEQIFARRGGHIPGAINYEWTRAMDSKDNYRIHKNVAKELAELGITKEKNVITYCQSHHRSGFTYLVAKALGFRHIKAYDGSWSEWGNLSDTPIEV
109	MAG14_105	MAG14_105_109	947	32	26	73	25	42	77	47	156	36	2	0	0	0	11	0	527	Phosphatidylserine decarboxylase (EC 4.1.1.65)	atgcttgaatttcaggtgcataggccgcaaccttctattacaatgcggttgtctatatctacagatatgatacagaggctagccactaccgtgaaagcaaaactgttcgccaacgctcaatatattttacctcatcacttaatttccagagctgcacactgttttgtcgagagcaagattagttggctaaaaaatagcctgattcgttcagccatcaatcgctttgatgtggatatgagcgaggccgaggaggaacgcattgaggcttatgctaacttcaatgctttttttacgcgctcattgaaagaaggtgctcgcccgtttcctgaagatgatcaagccatcattagtcctgccgatggaactattagtcagattggcgctattgaaaatggccgt…	MLEFQVHRPQPSITMRLSISTDMIQRLATTVKAKLFANAQYILPHHLISRAAHCFVESKISWLKNSLIRSAINRFDVDMSEAEEERIEAYANFNAFFTRSLKEGARPFPEDDQAIISPADGTISQIGAIENGRIFQAKGHDYSLIELLGGDVDLSRKFMGGTFATLYLSPRDYHRVHIPATGTLCQMIHVPGRLFSVNQGTVENIPHLFARNERVVNFFDTAHGPMAVILVGAIIVASIETVWAGQITPHKREVKSVDYNANQHESIVLQRGDELGRFKMGSTAIVLFGKNQVEWLPHWQAGHCIKMGEALGKVN
110	MAG14_105	MAG14_105_110	122	1	2	3	0	0	4	4	10	1	0	0	0	0	1	0	26	hypothetical protein	ttgagctttaaggccactaactatgctcatgttgtgcttggagtatttgataggtataacaagcgaaacggtttacttgataaacaacaaacaaaaccttctcaggtgcactatgacacttaa	MSFKATNYAHVVLGVFDRYNKRNGLLDKQQTKPSQVHYDT
111	MAG14_105	MAG14_105_111	956	12	12	37	4	21	21	33	86	20	0	0	0	2	7	0	265	Glutathione synthetase (EC 6.3.2.3)	atgacacttaaactgggtatagtgatggatcctatcagtgccatcaactacaaaaaggatagctctcttgcattattactagctgccagcaataaaaactggtcgcttttttatatggaacaagcagacctttatcagtggaatggaaaggcctacggtagtactcggcgactttcagttaaagcaaacccgaatggttggtataatttaggttcacgccaagaaatggaactcgctgagctggatgttatccttatacgaaaagaccctcctttcgacatggaatatatttacagtacctatatcttggagcaagcagaaacggaaggcacgctcgtggttaacaaaccacaaagtattcgagactgtaatgaaaaatactttgctactctctttcct…	MTLKLGIVMDPISAINYKKDSSLALLLAASNKNWSLFYMEQADLYQWNGKAYGSTRRLSVKANPNGWYNLGSRQEMELAELDVILIRKDPPFDMEYIYSTYILEQAETEGTLVVNKPQSIRDCNEKYFATLFPQCTPPVIVSRDAQRIRAFAQEHEKIVLKPLDGMGGTSIFKSYPNDPNLSVIIETLTDYGQRQVMVQKFIPDITLGDKRILMIDGEPIPYALARIPAAGEFRGNIAAGGNGIGQPLSERDRWIAAQVGPVLKEKGLLFVGLDVIGNYLTEINVTSPTCIRELNNQFDLNIGAMLIDKIEEKLAAQY
112	MAG14_105	MAG14_105_112	995	11	17	34	16	25	68	102	194	43	0	0	0	2	11	0	537	Voltage-gated potassium channel beta subunit	atgaaatatcgccaactcggaaactcaggtctcaagctttcagctatttctcttggctcttgggttacttttggaaaacaggttgacgtttccgatgcaaaggcgctattgcagtgcgcttatgattccggcgtcaatttttttgataatgcagaaggttatgaagcgggtaaatcagaagaaataatgggcagcgctatcgaaacgcttgggttacccagagatacatttgttatttcatcaaaagttttttggggcggcagtaagcccacgcaactagggttaagtgcaaaacatattcgtgatgcctgtgatgctgcgttaattcgcctaaaaatagattatcttgatctatttttttgtcatcgccccgatattgatacacccattactgaaacg…	MKYRQLGNSGLKLSAISLGSWVTFGKQVDVSDAKALLQCAYDSGVNFFDNAEGYEAGKSEEIMGSAIETLGLPRDTFVISSKVFWGGSKPTQLGLSAKHIRDACDAALIRLKIDYLDLFFCHRPDIDTPITETVRAMHNLVQQGKILYWGTSEWSAQQITEAHAVAAAHNLTPPTMEQPQYNLLHRERVEAEYRPLYEHYGMGTTIWSPLASGLLTGKYNKGIPAESRLTLPGYEWLKERWDSNEGQINQRKIQQLTQLAEDNGISLTHLSLAWCLKNSHVSTVISGASRLSQLKDNLKAIHVIERITPAMLEAIDGIVGNKPPEPDRFGQ
113	MAG14_105	MAG14_105_113	137	2	0	6	1	2	5	1	4	0	0	0	0	0	0	0	21	hypothetical protein	ttgcagttaaaagcagcactcacctactattttacacatgcgctatccgcttttccgccaaaagtagcagcagcgtgtgaaatagtagcgtcaggtaatttgcctattttaggttttaactcaatactgattttatga	MQLKAALTYYFTHALSAFPPKVAAACEIVASGNLPILGFNSILIL
114	MAG14_105	MAG14_105_114	572	6	2	8	2	0	8	2	10	2	0	0	0	2	3	0	45	UPF0301 protein YqgE	atgaaaacatcatcattcactagcctaaaaagccattttttgattcccatgccgaaagtggcgaagtcttcttttggctcctcgctaacaatcatatgtgaacatacgccagaaggagcttttggtattatcgttaatcgcccaaccaacctgatgttaggcgaagtacttcgccaagcgagccttgatcagggctatgcagataatattgtggagaatatagtatattctggtggtcctattgcaatggggcgaggctttgtactcaatagcaatgaaaaaagctggaatgcctgccttcagatttgtgacggattacagttgactacatctaaggatatccttgttgctatatctaaaaagcaaggacctgagcactttttagttgctttaggttac…	MKTSSFTSLKSHFLIPMPKVAKSSFGSSLTIICEHTPEGAFGIIVNRPTNLMLGEVLRQASLDQGYADNIVENIVYSGGPIAMGRGFVLNSNEKSWNACLQICDGLQLTTSKDILVAISKKQGPEHFLVALGYAGWGAGQLEQELADNAWLNCQADPAIIFDIPIHLRLSQAASSMGVDLALISDQIGHA
115	MAG14_105	MAG14_105_115	431	1	2	5	0	4	8	2	10	2	2	0	0	0	1	0	37	Putative pre-16S rRNA nuclease YqgF	atgaacattaataccttgctggcttttgattttggcatcaccaatattggcgtggctatcggccaaagcattaccagaacagctactgcattgccaccgctaaaagcaaaaaatggtacacctgattggtatcaggttgctgtgctaattgaacaatggaaacctgatgcagttgtcgtaggtattcccttcaatatggatgggtctgaatctgagatgtctcggcgatcacgtaaattcggcaaaagaatacaaggtcgctttaacctgacatgttatgaagccgatgagcggctaacatcctttgaggcaaaggagtgggcaggaaaacttggccaccatggccattacaaatctaaacctgttgatagcatggctgctcagattattttggaaagc…	MNINTLLAFDFGITNIGVAIGQSITRTATALPPLKAKNGTPDWYQVAVLIEQWKPDAVVVGIPFNMDGSESEMSRRSRKFGKRIQGRFNLTCYEADERLTSFEAKEWAGKLGHHGHYKSKPVDSMAAQIILESWLNDENNDIL
116	MAG14_105	MAG14_105_116	1457	22	18	42	14	13	39	20	67	19	0	0	0	0	12	0	275	Succinate-semialdehyde dehydrogenase [NAD(P)+] (EC 1.2.1.16)	atgacattgaactatcaatctgttttattaaaaggacaagcgtatattgggggaaaatggagatcaggaaatgcctattatccggtactgaatccagcaaatggtgaggaaataataaaagtaccagatttagaggcaaaggatgtcaatatagcagttaatgccgctgagcaagcactaaaaagctggggcaaggtgccagcaaaagaacgtgccgcattaatgaaacgatggcatcagcttattttaaataacctagatgagctagcaggcattattaccgcggaacaaggtaaaccactggcagcggccaaagatgaaatactttatggtgcttctttcattgaatggtttgcagaggagggtaagcgagcctatggggatattatccctgcagct…	MTLNYQSVLLKGQAYIGGKWRSGNAYYPVLNPANGEEIIKVPDLEAKDVNIAVNAAEQALKSWGKVPAKERAALMKRWHQLILNNLDELAGIITAEQGKPLAAAKDEILYGASFIEWFAEEGKRAYGDIIPAAKSSQRILVSKEPVGVVGAITPWNFPNAMVARKVAPALAAGCTVVLKPAEDTPLSALAMAVLAEQAGLPAGVFNIITTACPADIGVALTQHSVVRKLSFTGSTATGKILLRQCSETVKKVSMELGGNAPFIVFDDACIDRAVEGAIAAKFRNTGQACICANRIFVQEGCYDEFLEKFTKAVSILKVGSGFDEGIDLGPLINQSAIDKIDALVNDAKSKHGIILKGGKSHALGGLFYSPTVIGNASIDMRCFQEEIFGPIAPIFRFKD…
117	MAG14_105	MAG14_105_117	974	6	5	14	3	8	10	9	32	3	0	0	0	2	4	0	108	Hydroxymethylpyrimidine ABC transporter, substrate-binding component	atgatgaaaaaactaaaactgcttattggactgatatgcctatttcctgtttatgcaatggcagaaacatccaccgctatgcaccctgaaaaacctgagataaaaacattgacactgatgttagactggtttgttaacccggatcatggccctatcattattgcccagcaaaaaggttattttaaagaggagggcgtaaaaataacaatagaagagcctgctgatcctagcttgccacctaaactggttgcagcgggtaaggttgatcttgctgtttattatcagcccagcctattagaggggatagcgagggggctgcctcttgcatgggcaggcacactgattgatcacccacttgatggtattattgtacttgctaatggccctattaaatccttg…	MMKKLKLLIGLICLFPVYAMAETSTAMHPEKPEIKTLTLMLDWFVNPDHGPIIIAQQKGYFKEEGVKITIEEPADPSLPPKLVAAGKVDLAVYYQPSLLEGIARGLPLAWAGTLIDHPLDGIIVLANGPIKSLKDLKGKKIGMSNSSDQFPQLDAIFKPYGFSSKDVTLVNVGWNLSSALMSGQVDAISGGYRNFELNVLSLHGKKGRMFFYEKNGVPFYDELIFITNSKHHDVEAIRRFLRAIKRASDYIVNHPEASWNVFKSYNPRQLDNTLNHLAWKDTVEYFATEPAAENVERYERYAQFLKQHRDIGKTLRAKDMMIGL
118	MAG14_105	MAG14_105_118	764	0	0	6	6	2	9	2	6	1	0	0	0	0	2	0	34	Hydroxymethylpyrimidine ABC transporter, transmembrane component	atgataaaagagtgttttaagccgctagtggttattgttggacttctacttatatggcaagccattgttattgtatttcaactgccttcttatattctgcctggcccagataaaatattgctaagtttttatagagatgctgatctactttggcaaaatacacttattaccttggaggaaatgattctgggcttaactctcggtgttatagctggtatagggcttgccataatactggtttattttacatcgattcgcccttggttgcttcccattcttgttattactcaggcggtgccaacttttgctatggcgccaattattatgctctggtgtggttatggcttagcttcaaaagttgttatgacggctctgatgattttttttccagtggctact…	MIKECFKPLVVIVGLLLIWQAIVIVFQLPSYILPGPDKILLSFYRDADLLWQNTLITLEEMILGLTLGVIAGIGLAIILVYFTSIRPWLLPILVITQAVPTFAMAPIIMLWCGYGLASKVVMTALMIFFPVATCCYDGLRHTHKDWLDMAQTMGADHYAVMKHIRWPSALPVLASGLRVAVVIAPIGAVIGEWVGSSAGLGYMMLQANARLWVDQMFAALSVLAFCSVSLYFLTDYLMKKLIPWQQATTHSDSL
119	MAG14_105	MAG14_105_119	770	6	2	5	0	0	16	4	18	2	0	0	0	2	0	0	55	Hydroxymethylpyrimidine ABC transporter, ATPase component	atgtttgatgtcgtggtcagtaatgctggattagcctatggtaagcaccgtatttttactggattaaattttgtcttgaaaggtggtcattggacctgccttttaggtggcagtggcgttggtaaaaccagtttattgcgttttattgcagggctacatatcggagagggtgtagaaacagaaggtggggcttactgtcaggatggttctttgcttaaagggcgaatagcttggatggctcaacaagatcttctgctcccatggtatagcgtacttgataacattacattaggagcaaagctgcgcacatcattttttagaaaaaacaagctaagtttggctgcaaaagataaggcttatatgatcttaaagcgtgtagggcttgaggataaggcaaat…	MFDVVVSNAGLAYGKHRIFTGLNFVLKGGHWTCLLGGSGVGKTSLLRFIAGLHIGEGVETEGGAYCQDGSLLKGRIAWMAQQDLLLPWYSVLDNITLGAKLRTSFFRKNKLSLAAKDKAYMILKRVGLEDKANTLPQNLSGGQRQRVALARTLMENRPVVLMDEPFSALDAITRLNLQDLACELLANKTVLLITHDPLEALRLGHQVYHLQGHPARLTDAIEPLGDTPRSLDDKYLMSLQGKLLDRLRSEVHTFRD
120	MAG14_105	MAG14_105_120	797	8	8	7	4	4	22	15	25	9	0	0	0	0	4	0	106	Hydroxymethylpyrimidine phosphate kinase ThiD (EC 2.7.4.7)	atgtctcccattgcattgacgatagcaggctcagatagcggcggtggtgccggtattcaggcagatattaaaaccttctcggctcttggtgtttatggttgtagtgtcattacggcgttgaccgcacaaaatacacttggcgtgcagggagtctttgatattgatcctgcttttgtcgcacgacaaattgattctgttttgtcagatattgcggtagatgctgtaaaaatcggcatgttaagcaaccaagagattatcgagaatgtttctaagcttatcgaacgctatcaaccgcactacctagttgttgatcctgtcatggtggcaaccagtggtgacgaacttttaaagcagcaagcgattgatagtctaaaaaaactgatcattccaaaagccaat…	MSPIALTIAGSDSGGGAGIQADIKTFSALGVYGCSVITALTAQNTLGVQGVFDIDPAFVARQIDSVLSDIAVDAVKIGMLSNQEIIENVSKLIERYQPHYLVVDPVMVATSGDELLKQQAIDSLKKLIIPKANIITPNLPEALVLLDCSAPKTLDDMYHLMDPLMALGAKTVLLKGGHLAGDSAIDLFHDGNTVHLFKSPRIKTGNTHGTGCTLSSAITALLAKGYTLTEAVSAGKDYITETILHGTELNIGQGSGPVNHFYRNS
121	MAG14_105	MAG14_105_121	176	4	2	12	3	8	14	10	12	5	0	0	0	2	5	0	77	hypothetical protein	gtgttacctgttgcaaagcaaggtgaggtaactgagacagtcatagctgaacccattgaacctgatccagatgatgctggcgtaggaaaccgaccgacacatcagagtttacttttaatatactctgagagtgctttgtctactcttttcttgccactgagcaaagtcgttgactga	MLPVAKQGEVTETVIAEPIEPDPDDAGVGNRPTHQSLLLIYSESALSTLFLPLSKVVD
122	MAG14_105	MAG14_105_122	599	4	0	14	0	0	9	6	11	4	0	0	0	0	0	0	48	hypothetical protein	atgcatcaacatatagctaaaaaaacgtttaggacctatcttgggcgattcatgcagtggatactggggggatggtctataaaaggtcagcgtcctgagccagataaatacgtggtagttgtcgcccatcacacatcaaactgggatttttttatagcgctcagtgctaaatttattttagaactacgcacttgcttctttggtaaacatactttatttataggcccatttggctggattatgcgcattctaggcggtattcctattaagcgcagtgggagcaaaaaccgagtagatcaaattataaaggctattcgcgaaagcgatcaatttattttggcacttacaccagaaggtactcggtcaaaggtgaaaaaatggaaaactggtttttattat…	MHQHIAKKTFRTYLGRFMQWILGGWSIKGQRPEPDKYVVVVAHHTSNWDFFIALSAKFILELRTCFFGKHTLFIGPFGWIMRILGGIPIKRSGSKNRVDQIIKAIRESDQFILALTPEGTRSKVKKWKTGFYYIAHGAGVPIIPAALDFKNKEFVIGQPFFTTGNISEDMKALHRFFAPYQPKYPELSCQGELEEFINK
123	MAG14_105	MAG14_105_123	818	2	4	14	2	6	8	2	14	2	1	0	0	0	0	0	55	Formamidopyrimidine-DNA glycosylase (EC 3.2.2.23)	atgccagagttacctgaagtagaaacaaccctaaggggtatcacccctcatattataggacatccatttagagaagtcgttgttcgtcagaagcagttgcgttggccgattcccgataatcttaatgaactacttgcagggtatacaatccatcagatacggcgtagggcaaaatatttgttgttggaaacgaaaaatggctcactgattatccatcttggcatgtccggttgtttgcgaattgttgatccgtcagacctacctgttgaaaaacatgaccatgtggacttcgtggtatcagatagtctatccatgagatataccgatcctcgtcgatttggcgcgattttatggacaagcaaacccgctattgagcacaaactgctcgaggcgctaggt…	MPELPEVETTLRGITPHIIGHPFREVVVRQKQLRWPIPDNLNELLAGYTIHQIRRRAKYLLLETKNGSLIIHLGMSGCLRIVDPSDLPVEKHDHVDFVVSDSLSMRYTDPRRFGAILWTSKPAIEHKLLEALGPEPLTDDFSGEGLFMLSRGRKQAIKHFIMDNHIVVGVGNIYANEALFKAGIRPDRSSGSLSYKRYQLLVDAIKETLAQAIEQGGTTLKDFVGGDSKPGYFKQKLTVYGRKGKPCKRCNNIIVEIRQRNRATFFCNYCQG
124	MAG14_105	MAG14_105_124	773	12	6	9	2	8	7	15	18	12	0	0	0	6	6	0	101	Phosphatase NagD predicted to act in N-acetylglucosamine utilization subsystem	atgaccgacgacagaaagaaaatgcatataaagagtgttatctgtgatattgatggtgtaattctgcgtgacaataagcctatacccggggcagatgattttatacacagcctgcttgagcgtgatatcccactgctcatgttaaccaattatccctcacaaacccctaaagatttacaaaatcgctttgctgctgcgggtattaatattcccgataacttattttttacctcagccatggcaacagcagaattccttaaacgacaagaaggacaaaaagcctttgtgattggtgaaggtgcattaatacacgagctatataatgccggttttaccatgactgatatcaaccctgattttgtagtagtaggagaaacgaaaaactttaactggggtatg…	MTDDRKKMHIKSVICDIDGVILRDNKPIPGADDFIHSLLERDIPLLMLTNYPSQTPKDLQNRFAAAGINIPDNLFFTSAMATAEFLKRQEGQKAFVIGEGALIHELYNAGFTMTDINPDFVVVGETKNFNWGMIKMAARFVANGARFIGTNPDTHGPNFSPACGALCAPIERITGKEPFYVGKPSAWIIRAALNQMGAHSETTLIIGDNLRTDILAGVQAGLETALVLSGVTRAEDIGDVTFKPNHIFPSVAEIDLI
125	MAG14_105	MAG14_105_125	497	2	0	13	10	0	5	4	5	8	2	0	0	4	2	0	55	hypothetical protein	atgcaaattatagtagaaacgtcccatttaatggttcgaacatggcaagagcaagatctggccagttatgctgttatcgtgggcgatgaaaatgcaaccaagctgaaagtttttggttctgaaacaccgcaatgccgtgcagaaacagagttatggcgttatcagcttgagcaggataaacaaggctggtcaaggtgggctgttatccataagggcagtcaacagctcatcggttactgcgggttttctcgttatctcaatgagatcgaaattaactggcggttcttgcctgaataccgttgtaagttaattactattgagattatagaagcagttgttcatgttgggttcaaccagtttggattcaataaaattatctctttcacaagcccatcgaac…	MQIIVETSHLMVRTWQEQDLASYAVIVGDENATKLKVFGSETPQCRAETELWRYQLEQDKQGWSRWAVIHKGSQQLIGYCGFSRYLNEIEINWRFLPEYRCKLITIEIIEAVVHVGFNQFGFNKIISFTSPSNHRTLDVMKQVGMTLDRIEGWGQCSALCYSLCS
126	MAG14_105	MAG14_105_126	1010	0	0	10	2	8	1	2	16	2	0	0	0	0	2	0	43	tRNA-dihydrouridine(20/20a) synthase (EC 1.3.1.91)	atggctgaaaacgcacaaaatacacttaaatcggaaaaaaaattaaataggctcttttctgttgcgcccatgatggattggacggatcgccactgtcggtatttccatcgccaactatcgaaaaaagcgttgctatatacagaaatggtgaccagtagtgcgctcatctatggtgatcatgagcagtttttacaacacaatattgatgaatatcctttgtcgcttcaacttggcggccataatgctaaaagccttgctcgctgtgctcgctacgctcaggcatgggggtatcaagaagttaatcttaatgtaggctgtcccagtggtcgcgttcaaaacggccgaatcggtgcatgcctgatggctgagccagatactgttgcaacagctgtagctgca…	MAENAQNTLKSEKKLNRLFSVAPMMDWTDRHCRYFHRQLSKKALLYTEMVTSSALIYGDHEQFLQHNIDEYPLSLQLGGHNAKSLARCARYAQAWGYQEVNLNVGCPSGRVQNGRIGACLMAEPDTVATAVAAMKSVVDIPVTVKHRIGISPQASYDKLANFVGRVAEAGCETFIVHARIAVLTGLSPKQNREIPPLKPEWVYQLKKDFPSLEIIINGGIKSFDEISYHMLKLDGVMLGREAYQNPYLLAEVDNRLYSSVQPLIQRRQVIEKMVPYIEHQLAKGACLHHITRHMLGLYQGVQGARKYRRYISENAHKDGAGIEILIKAVNLVETEL
127	MAG14_105	MAG14_105_127	122	0	0	0	2	0	0	0	2	0	0	0	0	0	0	0	4	hypothetical protein	ggtaaaactgttcgcgaggttccctattatgggactgagtggggagatattttgaatgatcttcaggaagagtattcaaagctgccttgggatgaatacgaaaaagaagacaaggatagttag	GKTVREVPYYGTEWGDILNDLQEEYSKLPWDEYEKEDKDS
128	MAG14_106	MAG14_106_128	161	1	2	8	3	0	5	1	8	4	0	0	0	0	0	0	32	hypothetical protein	ttgatgataaactcttctacaggcatgaccgataccgtctggatagtggttcgcacttctattttaggcggtagtcatgcctttctggctagattattaaaagtcacacatcaggtaagtatgcaatacaaaataatctgtcatatactacagcgctcttaa	LMINSSTGMTDTVWIVVRTSILGGSHAFLARLLKVTHQVSMQYKIICHILQRS
129	MAG14_106	MAG14_106_129	1067	27	30	76	58	48	205	125	208	79	0	0	0	16	57	0	938	Ornithine cyclodeaminase (EC 4.3.1.12)	atgacaacgtttatcgatatacattgcataaaaagaatggtcagcaaaataggcttggccgagttttttgcaggtttagaggcacagctctgctcagactttaaacgttgggagcagtttgataagtgccctagactggccagtcacagtgatgttggtgttattgagttaatgcctattgctgatgagacatcttatggttttaagtatgttaatggccacccgattaataccaccaaaggtttgagtacggtaatggcttttggtgcattagctcaggttgaaacggggtatcctgatttacttgcagagttaacgctgacaactgcttttcgaacagccgctacatcagtgatggctgcaaaagctgttgccagaaaagatagccgtgtcatggcg…	MTTFIDIHCIKRMVSKIGLAEFFAGLEAQLCSDFKRWEQFDKCPRLASHSDVGVIELMPIADETSYGFKYVNGHPINTTKGLSTVMAFGALAQVETGYPDLLAELTLTTAFRTAATSVMAAKAVARKDSRVMAMIGSGAQSEFQSIAFHYLMGINEIRIFDIDRKAMDKLANHLKGFPEITVIQAASTKEAVQGADIVTTCTADKAWATILTPDMIEPGMHINAIGGDCPGKTELHVDILKQAKVFVEYEPQTRIEGDIQQLPAEHAVNDLWKVIASGEGGRESQQQLTVFDSVGFALEDFSALHYLYSLSKKLKEGEQVDLIPDLSNPKDLFTLITDDLSQSKDQPYKLKAAQA
130	MAG14_106	MAG14_106_130	821	11	2	10	10	7	13	6	26	10	2	0	0	0	10	0	107	hypothetical protein	atgaaacggattacactatgcgctgatgactacgccataacttccagcgtatctcaggccattttatctttggctgaccaaggtgccattcaagcaaccagctgtatggtgactatgccggcttggcaaaagcaagcggtaaacttacaagcttatacccataaactagcgcttggcctgcatttaaatttcacagaaggggcagggctaaccccatactttaagcagggatttcctagtctatatagcgtactggttaaaagtcaccttcgcttattcagccaggctaaactcgttgaagaagttaatgctcaaatcatagcgtttgctgatgctaccggcaggttgcctgactttattgatgggcaccagcatattcatcacctgccccagatcaga…	MKRITLCADDYAITSSVSQAILSLADQGAIQATSCMVTMPAWQKQAVNLQAYTHKLALGLHLNFTEGAGLTPYFKQGFPSLYSVLVKSHLRLFSQAKLVEEVNAQIIAFADATGRLPDFIDGHQHIHHLPQIRQALLSVMQSIDLPKSTTWIRSVSPLITPNNSLKHCIIEHSGARALRQLLNETHFKTNAAFAGVYSLSPHEAFRTLVQYWLNMLPDKGLIMCHPGFFGKTQKENETIEHEQARQNEYDYLSSSLFVDDCRSAGVELSASQL
131	MAG14_106	MAG14_106_131	371	0	0	2	4	0	3	4	8	0	0	0	0	0	2	0	23	hypothetical protein	atgaaccgactgattaaatttattcttgttggttcgctagcagcttgtgttcacttagctattctgcacactctagtaagttatttttcgctaacaccgctatctggcaacattattgcgtttgctattgccttttttatcagctacaccgggcagagcctttggacctttggccataagcagcataagcataccattacgttattacggtttttggctactcagttattttgcagctttgcactcaatcaggggctatatgcgctactacttcactttaccggcctaaactatatgatggccagctttgttgtattaatcacagtgcctttagtgacctacactttaagcaaatattgggcgtttaaatga	MNRLIKFILVGSLAACVHLAILHTLVSYFSLTPLSGNIIAFAIAFFISYTGQSLWTFGHKQHKHTITLLRFLATQLFCSFALNQGLYALLLHFTGLNYMMASFVVLITVPLVTYTLSKYWAFK
132	MAG14_106	MAG14_106_132	983	14	2	39	6	9	38	16	30	4	0	0	0	0	10	0	168	Glycosyl transferase, family 2	atgaccataaatacaatacagagaaacaagacaccttttttaagctgtgtagtacccgtcttcaatgaaagtaaagtcatcgcttcttttattcctgctttaattgaacaattggaagccgtgactgaaaaatttgaaataattattgttgacgatggcagcaaagatcatacagtaacacttgtaaaacccttatgctctaatccttgcgttaagttaatcggcctatcacgtaactttggcaaagaagctgctttaactgctggtattgatgcctgccaaggagatgctgtgatactcattgatgcagactttcaacaccctcttactatgattcctgtttttctcaactactggaaacagggctatgatatggtttatggtgttcgcagagatcgt…	MTINTIQRNKTPFLSCVVPVFNESKVIASFIPALIEQLEAVTEKFEIIIVDDGSKDHTVTLVKPLCSNPCVKLIGLSRNFGKEAALTAGIDACQGDAVILIDADFQHPLTMIPVFLNYWKQGYDMVYGVRRDRKSESLLKKKGAQLFYRIMSFSSGFEVPAHAGDFRLMSRKVVDSLKALPERNRFMKGIYAWVGHKSIGVPFDVQLRAAGESGWGYRKLTNLALSGITSFTTIPLRLVGAIGLIISLTSVFYAFYIIFRTLFLGSDISGWPTIVTAITFIGGIQLLSLGVLGEYIAGIFNEVKQRPAYLIGKKIGFDNEQDHEPTD
133	MAG14_106	MAG14_106_133	353	39	3	44	2	16	18	18	33	20	0	0	0	0	3	0	201	hypothetical protein	atgcttggaaagatagcatcttggatagaaagtgcgttacttaagtattaccctaagagaacaaacgtctggtacttcagcactatttcactgtttttttattctacaacacgacgtaaacatcgttatttcgttatagctgctaagttagcgatgatagatatccctaaattggctggccaggggttcaactctctttttttacacacaacaacaggcatgctgtcacttaagagaatacatttttttataacgcgttcatatgctttgggcttttccgccatttccatgactcaaaccatatcctacaatgggaaatactgggaagcgaactatttattacttgctatataa	MLGKIASWIESALLKYYPKRTNVWYFSTISLFFYSTTRRKHRYFVIAAKLAMIDIPKLAGQGFNSLFLHTTTGMLSLKRIHFFITRSYALGFSAISMTQTISYNGKYWEANYLLLAI
134	MAG14_106	MAG14_106_134	335	13	12	47	8	15	20	29	51	19	0	0	0	0	1	0	224	hypothetical protein	atgacaaaaaaatcagtgcttgctctgactattttagcaggtggtgtgctggctgtttgggggggcatagtcttatggtctggcaaccattctgcaccagatcatgctgctactaacacctcacaaatactagaacagcagccagttattaaccactctgaaaatgctgaacaaaatgaagtggatgtgacgcgtattattattgagggttctggcaaaagcggggaaaaaatccacagtattttatctgaaaaagtgattgttaatgataaaattgaagataaaaaacaacttcaggctaaagataaacaaaaacctccggcagcctcctcctaa	MTKKSVLALTILAGGVLAVWGGIVLWSGNHSAPDHAATNTSQILEQQPVINHSENAEQNEVDVTRIIIEGSGKSGEKIHSILSEKVIVNDKIEDKKQLQAKDKQKPPAASS
135	MAG14_106	MAG14_106_135	134	0	0	6	0	3	0	1	1	3	0	0	0	2	0	0	16	hypothetical protein	atgaagggttatagccaaatagaggtgagcttcttgaaagcgtttgagtataaacgcctatataaacgcctaggagatacattaagtacacatgaaatactcgagctagaaaataaatatatctatctactgtaa	MKGYSQIEVSFLKAFEYKRLYKRLGDTLSTHEILELENKYIYLL
136	MAG14_106	MAG14_106_136	584	20	9	51	16	27	54	35	57	22	0	0	2	0	4	0	303	hypothetical protein	atgcaaaaaaataaagttgcaattattgattgtgaacataaaacaacccctttaattcataagatgcttcgagacatacattgtcggcctcaaggcatcagttggcactctgctaatgagacagagcttaacagtttcagagcggttattatttcaggtggtaaccatttatttagtggcggttccaaacaaaaagaacagttaatacaacggtttgaatttttggaaaccttaactgttccaacgttaggtatttgccttggccatcaagctattggccttgctttgggcggaaaagtgtaccgaggcgtagcgcgtcgcaatacagacgttatgacaattgtcaacgactatcctttattcattaatatgtctgaagatcggccagagttttcagtg…	MQKNKVAIIDCEHKTTPLIHKMLRDIHCRPQGISWHSANETELNSFRAVIISGGNHLFSGGSKQKEQLIQRFEFLETLTVPTLGICLGHQAIGLALGGKVYRGVARRNTDVMTIVNDYPLFINMSEDRPEFSVDHCEGIELSSKMTLLASSQHYQVEAVMGVKRPLIGVQFHPETSGENGQILFKNFIKWADKQ
137	MAG14_106	MAG14_106_137	212	2	1	8	0	1	1	2	3	2	0	0	0	0	0	0	20	hypothetical protein	ttgtattttgaaattttccttgaggcttgcgtagctgtaattaaggttgtttatatccactgtcgtcaaactgaaggtattttgaaaattagccatgactcttataccaagctaattttttggactcgactaaagcgctttatccaaaaaagtatctgcttttcaaaagcggctaagccacatgataaagtgatgggtgagttcataccctga	MYFEIFLEACVAVIKVVYIHCRQTEGILKISHDSYTKLIFWTRLKRFIQKSICFSKAAKPHDKVMGEFIP
138	MAG14_106	MAG14_106_138	491	2	0	5	6	2	3	5	3	4	0	0	0	1	0	0	31	hypothetical protein	atgcctttatcttccaccgaatcttccttacaagcagattacgataaaagatacaaaaatattgagcgctttgcaaaaaaaaacttattaagtaactacgatctcaggaggaagggatatcatagatctgaacgctttatgatgcctaatatacaaattgataattttttatattcaaatgatttaaggctaatggggaagacctttttttgcactatacattctaataataggataaaacttactggcttcaatttcagtatttcaaatgactttttcactgcctatctatgggaaaaagagttaagttattatttgcaagtactggattttccagatccaaaatttataatgctatggaataaaaatcccgttaaagtattaacaccttcagattac…	MPLSSTESSLQADYDKRYKNIERFAKKNLLSNYDLRRKGYHRSERFMMPNIQIDNFLYSNDLRLMGKTFFCTIHSNNRIKLTGFNFSISNDFFTAYLWEKELSYYLQVLDFPDPKFIMLWNKNPVKVLTPSDYIPNWTTGGKNSGLNYISDLTQYIAFPLEAT
139	MAG14_106	MAG14_106_139	308	0	0	1	0	0	0	0	2	4	0	0	0	0	0	0	7	hypothetical protein	ttgaaggtgcttggtcttgaagatttttttagcattactcttttcatgccaagagtgatatttatataccaacaaaaatttgtattggaatcattaaatataatatcaagggatgttcaggagcgcagtcgtattaaagctgttctgctacctatagagatgggggttggccattgctcaacccattgcttaaaatcgattgatattaaagacagaaagggtgcttttagctttttaaaaaagcccatctatttcagctttctcatgcgcaagaccgctattggctgttgtactgtcatgcaatcataa	MKVLGLEDFFSITLFMPRVIFIYQQKFVLESLNIISRDVQERSRIKAVLLPIEMGVGHCSTHCLKSIDIKDRKGAFSFLKKPIYFSFLMRKTAIGCCTVMQS
140	MAG14_106	MAG14_106_140	176	1	0	0	0	0	0	0	1	1	0	0	0	0	0	0	3	hypothetical protein	atggagtttggtagtgataccaaccacatgttgaaaccttgctattgcgctgattatacaaacactaacgctgcgttgaaactttttgcaatagccctgctatttcatgattatgccttatgctgggagccgattgcccatgcccgtcatggtagttacaaaatacgattggtatga	MEFGSDTNHMLKPCYCADYTNTNAALKLFAIALLFHDYALCWEPIAHARHGSYKIRLV
141	MAG14_106	MAG14_106_141	1232	6	0	6	10	13	11	39	40	23	0	0	0	1	4	0	153	hypothetical protein	atgatgaccaatagacccgcattgaagcaaacgacaatatcccttgctattttattaataagcggcggactgttctttggccttacacggataaaagataaaccaaaacaagatgaaacatcctttaacccgccgattgtagaagtgaagaaccttgcccctgaatcaatcacgctaagcattgatagccagggagtagtaaagcccgaaatagagaccttattagtttcagaggtcagtggggtcgttaaatgggtttctcctgtatttgttagtggtgcggttttcaaaaaaggcgaaatattagcgcgcattgataacagtgattataaagcggcaatgagtcaagctgaagcaatgctaatagccagtaaagcacgccttgctgaggagttggcg…	MMTNRPALKQTTISLAILLISGGLFFGLTRIKDKPKQDETSFNPPIVEVKNLAPESITLSIDSQGVVKPEIETLLVSEVSGVVKWVSPVFVSGAVFKKGEILARIDNSDYKAAMSQAEAMLIASKARLAEELAKSEAEENNWLRSGKKLKDAPDLLLRKPYVKEAKANVKAAKAQQEKAERDFSKTFIKAPYDGMVKERLLNLGEFLSPGKAIGTIFSVNYAEVRLPITSTDLTIINLPAVGRNKEARDNVQLTQKIGHQAFNWRAVIDRVEGIVDQQNRMNFLVVKISDPYGLESPRAYPLKSGSFVHAEIKGKIVDNLFRLPRNAIYGSGRILVLNQSADGLQTLNFREIDIRHADEEDVFISGNIYEGDKISITRLNNPIDGMQVNTRLVKDEEKM…
142	MAG14_106	MAG14_106_142	3137	4	2	26	14	18	16	22	50	14	0	0	0	4	8	0	178	Acriflavin resistance protein	atgatgaaaaataaaatagaagaaaatacagatagaggtgtcattgcttggtttgttaataatagtgtcgccgctaatttgttaatggctattattattgtggctggactggtttctgtatggagcattaagaaaaaaatatttcctgattttgatgtaaatacaattcaggttaccgtcaattatcccggcgcgggttcaggtgacattgagcaaagtgtacttgttaagcttgaggaatcagtcaaagatattgctggtatcaaaaaagttatatcaatcgcccgtgacggtattgggcaattaatcatagaagttgaaactgggtatgatcttgatgaggtctacgattcagttaagtcatccatagaaggcctatcaaatttacctgaaaagtca…	MMKNKIEENTDRGVIAWFVNNSVAANLLMAIIIVAGLVSVWSIKKKIFPDFDVNTIQVTVNYPGAGSGDIEQSVLVKLEESVKDIAGIKKVISIARDGIGQLIIEVETGYDLDEVYDSVKSSIEGLSNLPEKSERPVISKLEPEKMMAHVAVYGDIDRLSLQRLAQQIHQELLALPEVIKAKVKGEQELEISIEVSEAALRKYGLTFDEVARQLRLSSIDVAGGSIRTSAGDISVKTRGQAYSGIDFADFVVRTNPDGTRLRLGDIARISDGFEEDKPIVRFNKQPAVSVQILSEGEQSDLETSKAIKAYLEKRQQSLPAGVSVTMWADISYYLEGRMNMMLKNMMYGALLVFMLLSLFLRLRIAFWVVVGIPVCFLGALWLMPHGPIPISINLISLFA…
143	MAG14_106	MAG14_106_143	608	23	14	50	6	12	14	8	18	6	0	0	0	0	4	0	156	CCA tRNA nucleotidyltransferase (EC 2.7.7.72)	atgcaagtatatctagtaggtggtgctgtcagggacgggctattgggtttaaaaataaaagacagggactgggtggtagtcggcgctacaccagaagtgatgtgcgctaaaggttttcgtttgattggtaaagactttcctgttttccttcatcctgatacccatgaagaatatgcccttgcccgaacagaacgaaagtttggccatggttacagtggtttcacattttatacctcggcggatatctctctggaagaagaccttcttcgaagggatttaaccattaatgcgatggcacaagatactgagggtaatatttttgacccctatggagggcaaaaagatctagaaaataaaaaacttagacacgtatcgtcagcctttgaagaggaccctctc…	MQVYLVGGAVRDGLLGLKIKDRDWVVVGATPEVMCAKGFRLIGKDFPVFLHPDTHEEYALARTERKFGHGYSGFTFYTSADISLEEDLLRRDLTINAMAQDTEGNIFDPYGGQKDLENKKLRHVSSAFEEDPLRILRVARFAARFHKAGFTIAHETMELMKKMVSTGEANYLIAERIWQETVRALMTSSPAIYFKTLMDCGAL
144	MAG14_107	MAG14_107_144	161	0	0	1	1	0	0	0	0	0	0	0	0	0	0	0	2	hypothetical protein	ttgatgataaactcttctacaggcatgaccgataccgtctggatagtggttcgcacttctattttaggcggtagtcatgcctttctggctagattattaaaagtcacacatcaggttttctatattaattctgtctgtaaatattggcaaaagtacttatga	LMINSSTGMTDTVWIVVRTSILGGSHAFLARLLKVTHQVFYINSVCKYWQKYL
145	MAG14_107	MAG14_107_145	977	2	0	4	0	0	0	2	4	0	2	0	0	0	2	0	16	hypothetical protein	atgcttacaaaaaaaaagatcatactattcattctaattgctatttcaccacctatttatagcaggtctattgtcatacacaatggatactggaatatatcatttgaagccaaaaatgaacaaagtataagcacctatacagactactatacatcaaagtacattcctttttcccaataccttatatgctttcttaatgaagcaacaattagtttagtcagtcaaaccgttgccataggaaatgaaacgtttgttgtaggaaataaaacggttgtcatagaaaatgatttacactatagaaaaaagtttaaattagataaccagaaaaaaccacttccaggtataaataaagacaatttcgaatctatattaaaactactcaaaggaagtaagaacata…	MLTKKKIILFILIAISPPIYSRSIVIHNGYWNISFEAKNEQSISTYTDYYTSKYIPFSQYLICFLNEATISLVSQTVAIGNETFVVGNKTVVIENDLHYRKKFKLDNQKKPLPGINKDNFESILKLLKGSKNIDKSDIPHIKALVRTFSPWAYTTPLFLERLEYKLKAANTSRKLTLCPERIDSIYYQAYTNFSVDIVNEEDIHIYLNQTDEQSTFFAQEFTTRKDHIKLEKKLKKACSQKLIRYQQKRRLAQLKPIAPDELSLLATVLTGAYGTMISCPTLGGDKKNSPHDKHVAATRIEMGLTPEGHKDGWYGGAGYSSGSDG
146	MAG14_107	MAG14_107_146	125	0	4	2	0	0	0	2	0	0	0	0	0	0	0	0	8	hypothetical protein	atgctaataaagatatttgataaggtagataacttttgtaatcaatttgagccaaaactaaataactatctgcttgagccggtcataaacgtgtttgaaagcagtcactatcaatccgtgaaatag	MLIKIFDKVDNFCNQFEPKLNNYLLEPVINVFESSHYQSVK
147	MAG14_107	MAG14_107_147	1103	0	0	9	0	4	5	2	8	0	0	0	0	0	0	0	28	hypothetical protein	atgcctcaatttaatagatcaactaatttgaatcaccacctaacaatcctattaaaaaacttcaaccaaaaaaatagtcagcaagaaaatttaaaaaggttattattaaataaatcactctatttaaaccaactagttattatcatgcttataaacaaaaaaattatactattaattctaattgctatttcaccacctacttatagcaggtatattgtcatacacaatggatactggaatatattatttaaagcaaaaaatgaaaaaagtataagcacctatacagactactatatatcagaaaatatttcttgttacgaatacctcatctgctttcttaatgacgcaacaattagtttagtaaatgaaacggttgtcataaaaaatgatttacactac…	MPQFNRSTNLNHHLTILLKNFNQKNSQQENLKRLLLNKSLYLNQLVIIMLINKKIILLILIAISPPTYSRYIVIHNGYWNILFKAKNEKSISTYTDYYISENISCYEYLICFLNDATISLVNETVVIKNDLHYRKKFNLNSQKKPFPSINKDNFESILKLLKESEKPNKSHTPHINALVRAFSPWTDATNSMFLERLEDKLKAANTSRQLTLCPERINSIYYQPYKKFSTSISGEGDIYIHLNKIDEKSTSFDQEHTSPLENLVRADRYSVDIKKEKEWKKQYYIYLKERHEQRRLAQLKRPIAYDELTTVFTGPYSKIIDSPALGDSKKDTPNDKQVAPTRAKVSPSHQNKHVSFLGDAGYSIEPD
148	MAG14_107	MAG14_107_148	785	0	7	4	7	4	11	4	19	1	0	0	0	0	2	0	59	Glycerol-3-phosphate regulon repressor GlpR	atgcagtttgattcactcattaacctatcccaaacttgtcgacatgaacgcattgttaaaatgatccgtgatcaaggctttgttacaacggaagaactggttacaacttttcgtgtaacaccacaaactattcgtcgtgacctgaattatttagatcatcagggtttaatttgcagacatcatggcggtgcaggggagcctagcaacagtacggtgaacacggcttacaacaagcgtcagcaaatgcaaaacgttgagaaaaacagaattgcagaaaaattagcagaaaaaattccagacgaagcttctttgtttattaatataggaacatcgacagaagcggttgctagaaaactactaagtcataatcgtttaaaggttatcactaataatctgcat…	MQFDSLINLSQTCRHERIVKMIRDQGFVTTEELVTTFRVTPQTIRRDLNYLDHQGLICRHHGGAGEPSNSTVNTAYNKRQQMQNVEKNRIAEKLAEKIPDEASLFINIGTSTEAVARKLLSHNRLKVITNNLHVASILLPKEDFTVIIAGGEVRNRDGGIIGEATRDFIGQFRVDYAVMGISGIDLDGSLLDYDYHEIRVSQAMIANACYRFLTADHSKIGRNAMMRLGHIKDIDTLFTDASLPKPLQETLTRYQTEWVAC
149	MAG14_107	MAG14_107_149	1028	5	6	28	5	8	16	9	32	18	0	0	0	0	6	0	133	UDP-N-acetylenolpyruvoylglucosamine reductase (EC 1.3.1.98)	atgaatattattgaaaatgccacattaaccagcaagaacacactggctttacatgcctctgctcgttacttgattgaagtctccacaattgagcagcttcaggaagccttagtttttgctaatcagaaacaactgaaggttattcctatcggcggtggtagtaatgttgtattggtaggttgcctaaatgctgtggttattcaaataaagttaatgggcaaaacagtgctttcatcgagtaaagacatcgtcttgatagaagctggtgcaggtgaggattggcataagtttgtacggtggacaattgataaaggtgcctttgggctagaaaacctgtcgcttattccgggctgcgtaggcgcttcacccgtacaaaatataggggcttacggtgttgag…	MNIIENATLTSKNTLALHASARYLIEVSTIEQLQEALVFANQKQLKVIPIGGGSNVVLVGCLNAVVIQIKLMGKTVLSSSKDIVLIEAGAGEDWHKFVRWTIDKGAFGLENLSLIPGCVGASPVQNIGAYGVELKDYFYSLTAIDVQTGDILQLSKNDCEFAYRDSVFKGTLKDRYIITSVQFELESTLTPHIDYPGLKQCIEAQHAETPLSAVLISDVVSEIRRKKLPDLNILANAGSFFKNPVIDNQHFNQLTAQYPDIVAYPTASSKHWKLAAGWLIEKAGLKGLREGAVGTHKMQALVIVNHGGATGEDIIAFSALIQQRVNSLFGVTLEREPRVYQG
150	MAG14_107	MAG14_107_150	785	12	20	27	9	12	33	16	36	12	0	0	0	2	2	0	181	3-deoxy-manno-octulosonate cytidylyltransferase (EC 2.7.7.38)	atgataatgcgtgaaaagcaaccctttattgttgttatccctgctcgttttgggtctagccgtttactgggtaagccgctggttgatattggtggaaaaccaatgatacaacatgtctatgagcgagcgctgcaaagtcgagcccagcgcgtgattattgccactgatgactcacgaattaaagcagctgctgaagcttttcaagcagaagtttgtatgacaagcactgctcatcctacaggtactgatcgtctacaggaagtggctttgctttatggcttgaacgagaatgatattattgtcaatgtacaaggagatgagccactgattccacctaaaaacattaatcaggtggctgatgccatgactatctctaagaatgttggggcggcaacgtta…	MIMREKQPFIVVIPARFGSSRLLGKPLVDIGGKPMIQHVYERALQSRAQRVIIATDDSRIKAAAEAFQAEVCMTSTAHPTGTDRLQEVALLYGLNENDIIVNVQGDEPLIPPKNINQVADAMTISKNVGAATLCEKIKTYKEMFDPNVVKLTVNSQGIALYFSRAPIPWDRNTFADGANTALPEKLSCCKRHIGIYAYRVGLLNRFVAWGMCPIEEIESLEQLRLLWHGQKIQVVDALETPPGGVDTKQDLENIRRFFANS
151	MAG14_107	MAG14_107_151	188	0	0	3	1	1	8	4	7	1	0	0	0	0	0	0	25	FIG002473: Protein YcaR in KDO2-Lipid A biosynthesis cluster	atggataagaggttgtttgaagtgcttgcttgccctttatgtaaaggcgatgtgaaatatgacaagaaaaaggctgagctaatctgccgtccttgtggtcttgcctaccctgttcgcgatgatattcctatgatgcttgaagatagcgcacgcacattaacgactgatgaacgcttgggtaagtcatga	MDKRLFEVLACPLCKGDVKYDKKKAELICRPCGLAYPVRDDIPMMLEDSARTLTTDERLGKS
152	MAG14_107	MAG14_107_152	1025	7	8	42	4	2	11	4	35	4	0	0	0	4	2	0	123	Tetraacyldisaccharide 4'-kinase (EC 2.7.1.130)	atgttgttggccgtcaaacagcgactccatgccgctgtacttaaagcgtggtttactgataagggttggactcggttattaatacctctaactctgatttttaaattattagctcagtaccgtaaagtgcggttattggcaaaaaatcgctgggaaccgcctgtacctattttggtcgttggaaatattactgtgggaggcactggcaaaacaccggtagttgcaagtcttgtaaaaggcttgcaggccagaggctattctcccggtattatcagtcgtggttttggctcatccgcccatggctatccccgccttgttacaccgttatcaacgccggaagaagtgggtgatgaaccgctgatgttagcaaagcagttgcgggttcctgttatggttgat…	MLLAVKQRLHAAVLKAWFTDKGWTRLLIPLTLIFKLLAQYRKVRLLAKNRWEPPVPILVVGNITVGGTGKTPVVASLVKGLQARGYSPGIISRGFGSSAHGYPRLVTPLSTPEEVGDEPLMLAKQLRVPVMVDSNRVQAAQALCNQHRCDLIIADDGLQHYNLKRHVELLVIDGKRMLGNNLCLPAGPLREPPERLHTVDVVLINGTPAKAPDFNFTEFTLIPESLKPVATNLSETIMPPEINTTVHAIAGIGHPDRFFNTLFSLGFKVIAHAFPDHYPFRAKDIYFDDDLPVIMTAKDAMKCVNFASQKHWYLPVIADISPTLIDAVVRLTEHSYRVKNG
153	MAG14_107	MAG14_107_153	116	8	8	18	6	8	11	4	18	8	0	0	0	0	2	0	91	hypothetical protein	atgaaatggcaagtaatagcagagctattgagaagagttttaacttcgtactggtacttggatggcgagtgcaatagcgtgagaaaagatgatgggtgttattgccttagacattga	MKWQVIAELLRRVLTSYWYLDGECNSVRKDDGCYCLRH
154	MAG14_107	MAG14_107_154	2333	22	6	79	4	12	27	22	60	17	2	0	0	2	8	0	262	DNA internalization-related competence protein ComEC/Rec2	atgccgcaaactatacaatgtatcacagcgatagctacttatgctgtaggtgtctcgcttgtatcactaatccccgtgctaccttctttactggtggttgtcatcataggtatgatggttctagcttggactgcctatatcctatttcgttcattatggtcttggttgcccttatccagtttcttgataggtgtcgttattgggctgggttatggtcattggtttcaagcgcatcagctgcctgctgagtttgagcgccagacgcatgttgttgtaggccatattgccagcttacctgtgtatactgaaaagtcagctcgttttatatttgttacagccattggtgaatcaaaaaatttacatattaaagtacgtttaaattggtattctgctcctgag…	MPQTIQCITAIATYAVGVSLVSLIPVLPSLLVVVIIGMMVLAWTAYILFRSLWSWLPLSSFLIGVVIGLGYGHWFQAHQLPAEFERQTHVVVGHIASLPVYTEKSARFIFVTAIGESKNLHIKVRLNWYSAPELRLQQRWRLKVKLRRPHGFASPGAMDFEGWAAREGVQATGHVLSGELLSQPTSFSIRQHLYTWLVDSASSVNLGVLKALLLGDKSGISTEQWQLLNGTGTTHLVVISGLHIGLMAWLGYWISLLLARFGLLPLQVMPLPRIAAIFSLLLAGGYAFMAGVSVPVQRALIMTTVAMAGPLLGLRPAPSTLLIIAFALVVTIDPLAVTSIGFWYSFIAVGGLIYGLSGRYGSIGSLAKWLRPQWLIFCIMTPLLLSNGQPVSLLSPLIN…
155	MAG14_107	MAG14_107_155	125	1	0	3	2	0	0	0	0	2	0	0	0	0	0	0	8	hypothetical protein	atgctgatatatagcatagaacctgatagcacagttggtcagaaaatatgcctgccaaatgcttttgagtgttatcctgatgattattgtcattgcccggtaatgttttcgcctcctcttacttag	MLIYSIEPDSTVGQKICLPNAFECYPDDYCHCPVMFSPPLT
156	MAG14_107	MAG14_107_156	530	9	2	11	1	4	3	10	12	2	0	0	0	0	0	0	55	hypothetical protein	atggtgaaaagactaatacaacgttatttgccgagcctaaaatcgatacaggaaaagcggtccctacgttttttcgggtctgctatatatgcgcctactttatggcactttaatcgccggtcagtggcgtctgcgttttttatcggtattttttgtgccttcttgcctattccttttcaaatggttgttgctgcctttctgtcgcttctgttccgctgtaatattcccctatcaatagccttagtttggatcactaatccagtgaccatgccctttattttctattttacctatagagtcggctgcctacttcttcaggtaccgcctcattacagttcagtggatctgtcgctggaaggcatcagtgttgagctagcccgaatctggaaaccgctttat…	MVKRLIQRYLPSLKSIQEKRSLRFFGSAIYAPTLWHFNRRSVASAFFIGIFCAFLPIPFQMVVAAFLSLLFRCNIPLSIALVWITNPVTMPFIFYFTYRVGCLLLQVPPHYSSVDLSLEGISVELARIWKPLYLGSIVSGIIISSFCYVMIRLYWRCNILYLWRKRRERRQSKLNR
157	MAG14_107	MAG14_107_157	293	13	3	41	8	6	20	16	28	13	0	0	0	2	1	0	151	hypothetical protein	atgcagaaaaattttcaaaagcaaaaacccaaactggaaaatcggggcattctggaaaaggtcataacagatggcccccatagcgattggctgggtatgcctgattattatattcatagcctgacagttgcaggtgaagactataaatacctttcatctgaacaaaagttagatgttagcaaaggcgatactgtggtatttcgttataaagaacagggcggggaaaagcggatcgacaaacgctcgttaggtatttatatcgacccaagtcaataccttagtgagcaatcctga	MQKNFQKQKPKLENRGILEKVITDGPHSDWLGMPDYYIHSLTVAGEDYKYLSSEQKLDVSKGDTVVFRYKEQGGEKRIDKRSLGIYIDPSQYLSEQS
158	MAG14_107	MAG14_107_158	227	5	10	13	2	2	22	13	9	0	0	0	0	0	4	0	80	hypothetical protein	atgtcagccttggatggagtggggcacaaaaaattcatagtaagatattcatttttagtgcactacatcatatctgaaccattgctaaataaaggacagggaatgcataatactaaattagctaatgagcttaaaaagctgcaaatagtacttgataaacttgctttttacgtaaaaagtcagctgaccaaaaaacaagtctctaaagagaagcccaagcatcattaa	MSALDGVGHKKFIVRYSFLVHYIISEPLLNKGQGMHNTKLANELKKLQIVLDKLAFYVKSQLTKKQVSKEKPKHH
159	MAG14_107	MAG14_107_159	761	22	12	26	2	6	16	7	22	12	2	0	0	4	6	0	137	GTP cyclohydrolase 1 type 2 homolog YbgI	atgagtattaccctaaaagaaatagtagactgtttaaatacagtgctttgtcctcagttatttaaagattattgccctaatggtttgcaagtagaaggtcgagcgaaagtcactaaaataattagcggtgtcacagcttgccaggctttaattgacgcagctattgagcaacaagcagatgcgattcttgtacaccatggctacttttggcgtggcgaagaggcagctttaacgggcatgaaaaaacgccgccttagcgctttactaaaacacgatattagtttgattgtttaccatctgccactggatgctcatgctacattgggtaataacgttcagttggcaaagcagatgaattggccaatcaagggtgctatgccctctgagaaagagcacgcc…	MSITLKEIVDCLNTVLCPQLFKDYCPNGLQVEGRAKVTKIISGVTACQALIDAAIEQQADAILVHHGYFWRGEEAALTGMKKRRLSALLKHDISLIVYHLPLDAHATLGNNVQLAKQMNWPIKGAMPSEKEHAIGNWGELNQPMTLTELGLQLEQVLGRTPLIIEGGNHLVNSIAWCTGAAQSMIDKALTLGVDAFISGEISEATVHVARENNIHYVSAGHHATERYGVQALGHFLAEKFGVGHQFIDIDSPV
160	MAG14_107	MAG14_107_160	164	0	0	0	0	0	0	0	0	0	0	0	0	0	0	0	0	hypothetical protein	ttgatctcagatagtaacgcattgctgctgattatcttcttaactaaagtattaaccctatggcatgggttcaatataaaaacattgataaaacgattgcaatattccaaaaacataagcaacggtgagtttagaactatcaatagtcatcatttttttaactaa	MISDSNALLLIIFLTKVLTLWHGFNIKTLIKRLQYSKNISNGEFRTINSHHFFN
161	MAG14_108	MAG14_108_161	170	1	0	2	3	4	9	0	3	4	0	0	0	2	3	0	31	hypothetical protein	atggcattatctgatagttctgcgctttctgtttttttatcatgggtgaggtttgctcaaagtaaaaatacccgcctttgctttaccaatatgcctgctcaatttgaggcactggctaaagtatcagatgtgtatgacttaatcagaactgctcgatgtaatagtacttag	MALSDSSALSVFLSWVRFAQSKNTRLCFTNMPAQFEALAKVSDVYDLIRTARCNST
162	MAG14_108	MAG14_108_162	602	0	0	0	0	1	1	1	5	0	0	0	0	0	1	0	9	hypothetical protein	gtggagtgtacttcaagtattataacagcattaactagcattttgtctgcattgatcggaggtcttatcacaggttttttcacgctaagggcggtcaaatccacatttgaaaatcaaaaaaaacaaagtaataaagaagaaaagaaaatcacttcaagtttacttcaaggtattcacgacgagctggaaactattggagaaggttataaaaaacaaataggctcaaagctagacgaattagaagataatgagcctatgcttgactacgctccattaagcggtgattattttccaatctataatggaaacacgttgattatcggtagaatacaagacaataatttaagaaaaaatattattaaaacctaccatattggtacatcaatgattgattctata…	MECTSSIITALTSILSALIGGLITGFFTLRAVKSTFENQKKQSNKEEKKITSSLLQGIHDELETIGEGYKKQIGSKLDELEDNEPMLDYAPLSGDYFPIYNGNTLIIGRIQDNNLRKNIIKTYHIGTSMIDSIKMNNYIISKYEHACILYNSANTEVNKHHRDAYYAVLIKYASLLKEGHQMLLDSITTTLDEIKKTLEH
163	MAG14_108	MAG14_108_163	1037	7	10	34	3	2	33	11	50	13	0	0	2	2	16	0	183	S-adenosylmethionine:tRNA ribosyltransferase-isomerase (EC 2.4.99.17)	atgcaagttagtgactttgattttgatctgcccgatgagcagatcgctcgataccctacagagcagcgtaccggtagtcgtttgttatgccttgacggtgttactggcgctattgaccaccagatgtttgttgccattgaggcattaattgagcctggtgatttgttggtattaaataatactcgggtgattcctgctcgactttacggacacaaagaaaccggcggaaaaatagagttattggttgagcgggtgttggatgaatacggcgtgcttgcgcatattcgttcaaacaaaccgctaaagttaggcatgcgtttatttttggcagatgctcaaattaatgcaaccgtaacagcgcgtaagggagctttatttattctgtcttttgatcaaccg…	MQVSDFDFDLPDEQIARYPTEQRTGSRLLCLDGVTGAIDHQMFVAIEALIEPGDLLVLNNTRVIPARLYGHKETGGKIELLVERVLDEYGVLAHIRSNKPLKLGMRLFLADAQINATVTARKGALFILSFDQPVLPSLQAFGHMPLPPYINRGDEQADRVRYQTVFAKRDGAVAAPTAGLHFDEDLLQRLEKKGVNKVFVTLHVGSGTFQPVRVDKVEEHVMHAEYIEVSEEVCEAVRETRRRGHRVIAVGTTSVRSLESASHSGEIEPFQGDSDIFIYPGYRFKSVDAMVTNFHLPQSTLLMLVSAFSGQNAILNAYQEAVKKEYRFFSYGDAMWLTRKPDTLK
164	MAG14_108	MAG14_108_164	1121	11	21	44	9	10	27	6	60	9	2	0	0	2	16	0	217	Queuine tRNA-ribosyltransferase (EC 2.4.2.29)	atgcagtttgagcagctggccactgatggccatgctcgacgtgggcgattagcttttcctcgcggtattgtagaaacaccctgctttatgcctgtgggtacttacggcaccgttaaaggtatgttgcctagggatattgaagcaattggggctgagattattcttggcaatacttttcatctgatgttgcgcccaggaactgatattatcaaagcacacggtgacctgcatgactttaatcagtggcaacgtcccattctcacagactcgggtggctttcaggtgttcagtttgggcaaattgcgtaaaattactgaagaaggcgtgtcttttcgctcaccggtggatggatcaaatgtttttttgagcccggaaatttccattcaagttcagcgtgat…	MQFEQLATDGHARRGRLAFPRGIVETPCFMPVGTYGTVKGMLPRDIEAIGAEIILGNTFHLMLRPGTDIIKAHGDLHDFNQWQRPILTDSGGFQVFSLGKLRKITEEGVSFRSPVDGSNVFLSPEISIQVQRDLGSDIVMVFDECTPGDASEDVARESMAMSLRWAARSKAAHGDSPSALFGIIQGAMYENLRDRSLEGLMEIDFDGYAIGGLSVGESKADMMRILSHITPKIPENRPRYLMGVGKPEDIVEAVCRGVDMFDCVMPTRNARNGHLFVDQGVIKIRNAVHKMSDKPLEEDCDCYTCQHFTRSYLNHLDKCGEILGSMLNTIHNLRYYQRVMSGLRDAIEKGKLRNFVEEFYDKRGQAVPIFGLS
165	MAG14_108	MAG14_108_165	338	5	6	8	12	10	37	27	55	29	0	0	0	0	15	2	206	Protein translocase subunit YajC	atgttatcattattcagtctggcatacgcagatggcgcagcagctgcacctgtaggccctggcatgatcgggcagttggtgatgttgggcggctttgtgctggttttctggctcttgatctggcgtcctcaaagcaaacgctccaaagagcataaaaatttgctatccaatttaaataaaggcgatgaagtagtaacaacaggtggcattgttggcaaagtaacccatgtaacagatgagtttcttacgctattggttgcagataacatagagcttaatttccagaaaagctccgttgctgctgcattgccaaaaggtaccattaaggctataaaataa	MLSLFSLAYADGAAAAPVGPGMIGQLVMLGGFVLVFWLLIWRPQSKRSKEHKNLLSNLNKGDEVVTTGGIVGKVTHVTDEFLTLLVADNIELNFQKSSVAAALPKGTIKAIK
166	MAG14_108	MAG14_108_166	1868	24	22	58	28	20	59	36	89	25	2	0	0	4	28	0	395	Protein translocase subunit SecD	atgctcaatcgataccctctgtggaagtatcttcttattcttatggttgtggtttgggggtttatttacgccttgcccaacttataccctgctgatccagcagttcaggtaactggtgccagtgctgctgttgaaatgacaggctctgttttagctcgtgctgaaaatgcgctcaaacaaggcggcattaaaataaaggcagcagaacagcatgaaaactctttgcttatccgccttaaaaaattagatcaacagcagcttgccaagtcattaattaaaaatgccttgggtgataactatattgtggcgctcaatttggcgcaaacaacccctgaatggttgagagcgattggagctagcccaatgaagttgggtttagacttgtcagggggggtacac…	MLNRYPLWKYLLILMVVVWGFIYALPNLYPADPAVQVTGASAAVEMTGSVLARAENALKQGGIKIKAAEQHENSLLIRLKKLDQQQLAKSLIKNALGDNYIVALNLAQTTPEWLRAIGASPMKLGLDLSGGVHFLLTVDTAKAVRNKMDIANADIRTLLRKDRLRYRTMPERADGAYQLAFNNEATRDTAMDKISKEFPDFIVEGRTLNGRYLLSYHYSEAGIKQIEDYAVRQNLTTVRNRVNELGVSEPLVQRQGHNGIVVELPGVQDTAEAKRILGKTANLEFRLAATPDESPANTEKFEFRSGHRPPATLERDVILTGEQVSSAQANFDTQTGQPQVNITLDSSGGAKMNRETRHNIGRAMAVLFIEQKPYTHTVTKIVDGKKVKVNEQSFKEDSK…
167	MAG14_108	MAG14_108_167	968	8	0	34	10	7	29	39	88	28	0	0	0	0	27	2	272	Protein translocase subunit SecF	atgggaaagaacaagcacatggctcggacaaataagagtgcctcatcagagacaagagttgatgaaaaaatcattggttttatgaagcttagggtaatggctgctgttttttccattgcccttgtcatggcctccattgcctctttagcgattaacggaattaaatggggtcttgactttaccggtggtaccttgattgagctgcactatgataatcctgttaatgtgagtagtgtcagagggcaattagaaaagcatggttatactgatgcgttagtaaagcagtcgggctctgctaatgatgtcctcgtgacaattggtagtgacaatgctgcgttaggtcatcgagttgtctcaatcttgaatgctgataaccaaggaaaagtagaagctaagcgt…	MGKNKHMARTNKSASSETRVDEKIIGFMKLRVMAAVFSIALVMASIASLAINGIKWGLDFTGGTLIELHYDNPVNVSSVRGQLEKHGYTDALVKQSGSANDVLVTIGSDNAALGHRVVSILNADNQGKVEAKRIEYVGPQVGERLREQGGLGILMALGLVMLYIAFRFQLKFSIGAVTALAHDSIIVLGVFSLFGLQFDLTVMAAILAVVGYSLNDTIIVYDRIRENFRKRRKSDAIEVINVSLTQTLGRTLATSGTTLMVLMALFLFGGEMIHNFSTALIVGIGVGTYSSIYIASNLLLRMKISREDLIVPVKQNDLDGRP
168	MAG14_108	MAG14_108_168	1406	10	0	10	0	14	12	8	24	0	0	0	0	4	0	0	85	hypothetical protein	atgcaaccgacaccccccacaggcgctgcctctcaggctaaaacggttaatttagatacttctaaagcacaaagcacaaaaggcggacatgttaaacgcagggttgctttgatagagtcctcacaaccacaacatattccccaaataaaaggcaaccctgacaatactcagctaaagcaacgccgggttgcccgagtatcaggtgctcctaatgttataacacgcactcaagagcctcgcggtcgcagcaatccgatatcttctcctactccccctatacccgctcctagacgtaaaaaaaatcaaggcattaataaaactgcattccaaaaacaaacaatagagtttgatgatatcgccccgacagctcctcccagaagaaagaaaaacctccgtcaa…	MQPTPPTGAASQAKTVNLDTSKAQSTKGGHVKRRVALIESSQPQHIPQIKGNPDNTQLKQRRVARVSGAPNVITRTQEPRGRSNPISSPTPPIPAPRRKKNQGINKTAFQKQTIEFDDIAPTAPPRRKKNLRQSRASTEPEAQKSGTTPVLEDRNELTASAEAELQKSEPNIEEISRLLDKLNENQINDVLKKVEDNKKNATPAKSKNKKTSIFSKFANRILKRNKKPSVFSKFANRILKRNKKNVASEQVIDHSTKALNKVVNSKLIKKYLITEYIATENPPAALFRAAPEHAKVKKLDYVFETDFINEALYKQEGLHEYSYATLGSFVKQQIRAHCSMDHCLEKKDDKTITDIVFSAQRFKKKIAELKEESPHDIIFNDMMEIVYNACKKAIKENDE…
169	MAG14_108	MAG14_108_169	128	1	0	0	3	1	5	0	5	0	0	0	0	0	5	0	20	hypothetical protein	atgagcacaggcagctggactttagaagaaaacgtaataatgagtaatagcaaggctattgcaaatagtttcaacgcagctctggtattatatggccagcgcaacagcgtagttagcaaagataattag	MSTGSWTLEENVIMSNSKAIANSFNAALVLYGQRNSVVSKDN
170	MAG14_108	MAG14_108_170	815	23	12	61	20	19	66	27	60	20	0	0	0	3	17	0	328	Inositol-1-monophosphatase (EC 3.1.3.25)	atgcaacccatggtaaacatggccttgcgcgcagcgcgtgcggccggtgagattatcactcgagcttttgccgaccttgataaactcaagatcgaaactaagaaccgaaacgatttcgtcacggaagtggacaaagcgtcagaacagaccattatttctgcgttaagcaaggcataccctgatcatggcttttacggagaagagtctggttatcatctaggaaaaggtgcgggtaatgattatcaatggatcattgatccgttagacggcaccactaatttcatccgcggtataccacagtttgcgatttctattgcttgtcaataccgtggtcgactggaacatgccgttgttatcgaccctataaaaaatgaagaatactgcgccagccgcggttac…	MQPMVNMALRAARAAGEIITRAFADLDKLKIETKNRNDFVTEVDKASEQTIISALSKAYPDHGFYGEESGYHLGKGAGNDYQWIIDPLDGTTNFIRGIPQFAISIACQYRGRLEHAVVIDPIKNEEYCASRGYGATLNSKRIRVSNRKSLEGALIGTGIPFMEPSIHHLDNYLNMMRALLGDTAGIRRAGAAALDLAYVASGRLDAFWEIGLKKYDMAAGALLIQEAGGLVSDFKGGSDFMNTGQVVCGSPRCFKEVLQRIHPFVVETMNH
171	MAG14_108	MAG14_108_171	155	6	4	18	6	2	8	8	14	1	0	0	0	0	2	0	69	hypothetical protein	ttggctgtacggtgttggattataccagatggatttacagatagttcattttttttacttgaactgtctgaatatatggagtccataagatacagctcacctgctgcatccggcaaagcaggacataggaaaaaaagtaaggcacgctttaattag	MAVRCWIIPDGFTDSSFFLLELSEYMESIRYSSPAASGKAGHRKKSKARFN
172	MAG14_108	MAG14_108_172	383	44	48	167	35	28	81	77	136	59	2	0	0	0	16	0	693	Lactoylglutathione lyase and related lyases	atgttcagtcatataatggtcggagcgaatgacttcgacgcatcccgtaaattttatgatgctacttttgcagaaattggtatcaagcctggtgttgctgatccactagggcgcatattttgggtaactgatagtggcgtatttgtgatcactaaacctattgatggccgccccgcaagtcacggtaatggtgcaactattggattttcagtcgaatcatctgaacagtgtgatgcatggcatgccgctggtgttgccgcaggcggtacttcttgtgaagatccaccaggggaacgcccagaccctctaggaggaaatccatactaccttgcttatctgcgtgatccagcagggaataaactttgtgcactaaaacacaggtaa	MFSHIMVGANDFDASRKFYDATFAEIGIKPGVADPLGRIFWVTDSGVFVITKPIDGRPASHGNGATIGFSVESSEQCDAWHAAGVAAGGTSCEDPPGERPDPLGGNPYYLAYLRDPAGNKLCALKHR
173	MAG14_108	MAG14_108_173	1463	7	4	20	14	16	16	18	19	8	0	0	0	0	8	0	130	Flagellar regulatory protein FleQ	atggagacagctaatcaggtacttatcatcgatgatgcacagcagcgtcgtcatgatttaagcaccgtacttcggtttatagggtatacacccattgctatcggtgccgcatgctgggaaagttctatcagtgtgcataagcccgaaaccttttgtgctctttttcttggtgacttccaagagtctgaaaaatccatgcaggctattttgacccgtgttcagcgctggagtgcaggcattccagtcattcgtatagatgaacccattccagataacctgcaagcctcatttcgccgacaaattgttgcccgagtcatttggccttgtagtcaatcagagctcttgtctagcttgcattatagccaagtttatcgtgaacagtggcgtcaaactcagcaa…	METANQVLIIDDAQQRRHDLSTVLRFIGYTPIAIGAACWESSISVHKPETFCALFLGDFQESEKSMQAILTRVQRWSAGIPVIRIDEPIPDNLQASFRRQIVARVIWPCSQSELLSSLHYSQVYREQWRQTQQAGSSQQVELFQGLVGKGEKIRDVRSAMAKVANSDVNVLITGESGTGKEVVARNLHLHSSRIDGPFVPVNCGAIPGELLESELFGHEKGAFTGAISARKGRFEMASGGTLFLDEIGDMPLYMQVKLLRVLQERVIDRVGGDTPVAVDVRIIAATHKNLEEMIEKETFREDLYYRLNVFPIEMPAMRDRVEDIPLMINELIRNMEKQGRGAIRLSSAAILSLCHHEWLGNVREMANLLERLSIMYPYGVIGLQDLPERFRHLEGEEVN…
174	MAG14_109	MAG14_109_174	461	0	0	0	0	0	0	0	0	0	0	0	0	2	0	0	2	hypothetical protein	atgaagttaaaaattagcattttttctatttttatccctctgttactaaacttttcttattctgcttatggggatgtaatttataagaatgtttttttatttaatctagaaagcaatacatatgaagatgtttacccaatggatgaaggtgatattttctggctcatagaaaataatttagaaaaatcgcgtacgaattactttatagaacatggatgtccatttgatagtatttatgatgttaaatttcggttttatgaaaaaacaaagggaggtaacgttattagactgtatacaaatgaagataaagaaccctatgaagagtttaatgcaataaatgaggagccagatttgggtaactcccttgatttagataaaataaagaatagaaatgatata…	MKLKISIFSIFIPLLLNFSYSAYGDVIYKNVFLFNLESNTYEDVYPMDEGDIFWLIENNLEKSRTNYFIEHGCPFDSIYDVKFRFYEKTKGGNVIRLYTNEDKEPYEEFNAINEEPDLGNSLDLDKIKNRNDIRESTKNLVEKMFSNLESKRF
175	MAG14_109	MAG14_109_175	443	0	0	0	0	2	0	0	0	0	0	0	0	0	2	0	4	hypothetical protein	atgaagctaaagattagtgttttttcttttttgatccctctattactaaccttttcttattccacttatggaggtgatatttacaagaggattttattgtctaatatagaaagttgtccacttagggttgatatcaacatggaagaacatgcaatttctgctcatatattatataatttagaatcaagttgtaataagtactttctgaaaaatatggatttatttcgcactataaaaaataagtattcattggtctgtgcgtctgatattaaatttcagctgtataaaaaattacataaaaattgtaatgcaataaatgatgagtcacattttgatgaaacccttgatttaggtgaaataaagggttttggtgatatggttgaaaagactaatgcatta…	MKLKISVFSFLIPLLLTFSYSTYGGDIYKRILLSNIESCPLRVDINMEEHAISAHILYNLESSCNKYFLKNMDLFRTIKNKYSLVCASDIKFQLYKKLHKNCNAINDESHFDETLDLGEIKGFGDMVEKTNALVEKMFSDLDNKELQ
176	MAG14_109	MAG14_109_176	149	0	0	0	2	0	0	1	0	0	0	0	0	0	0	0	3	hypothetical protein	ttggaatgtctcgcaataaccctgctattactcgtcattccgcctaattctggagtcagaccgctcatgctcattatggtagttagaaaacacgatgaatattacttaataacagatgatattgataaatattatttagatataaaatga	MECLAITLLLLVIPPNSGVRPLMLIMVVRKHDEYYLITDDIDKYYLDIK
177	MAG14_109	MAG14_109_177	494	4	2	23	8	4	21	6	22	8	0	0	0	2	14	0	121	Phosphopantetheine adenylyltransferase (EC 2.7.7.3)	atgattaaagtaatatatccaggtacatttgacccaataactaaaggtcatatggatctggtagaaagggctgcccatctgttcgatactgtgatcattgcggtggctgaaagccccaagaagaagcctctttttagtttaaataagcgggttaatttagcaaaagaagtctcagcgcatgttgctaatgtagaggttactggatttaattcattactcgctgactttcttgaagagaaacgcgccaatgttattttaagaggactgcgtgcggtatctgattttgagtatgaatttcagatggctaacatgaatagagttctggcgcctaaagtagaaagcctttttttaacgccatctgagcagtattcttatatttcatcaacactcgtgcgagaa…	MIKVIYPGTFDPITKGHMDLVERAAHLFDTVIIAVAESPKKKPLFSLNKRVNLAKEVSAHVANVEVTGFNSLLADFLEEKRANVILRGLRAVSDFEYEFQMANMNRVLAPKVESLFLTPSEQYSYISSTLVREISLLGGDVSKFVAPCVQTALEAQLNAQNQGG
178	MAG14_109	MAG14_109_178	269	2	2	0	0	4	7	2	7	0	0	0	0	0	0	0	24	Phosphocarrier protein, nitrogen regulation associated	atgatcaaagaggaagtcactattattaataagcttggcctgcatgctcgagcagcatccaaatttgttaatgttgcctcaggctatgtaagtcaaatccaaatttcgtttaacaataagaccattgacggaaaaagcattatggctgtaatgatgcttgccgcaggcaaaggatccgtactaaagcttaatattgaaggagaagacgagcagaaggcttgcaaggcaatctgcaagttgattgataattgctttgatgaagaggaatag	MIKEEVTIINKLGLHARAASKFVNVASGYVSQIQISFNNKTIDGKSIMAVMMLAAGKGSVLKLNIEGEDEQKACKAICKLIDNCFDEEE
179	MAG14_109	MAG14_109_179	869	3	7	24	11	8	21	27	45	17	0	0	0	0	6	0	171	RNase adapter protein RapZ	atgaaactggtgattattagtgggcgctcaggttcaggaaaaagctcagcactgcatgctctggaagatgaagggtattactgtgcagataatattcctgttagcattcttgaccagctacctattaccctaaaaaagacacataaaacaccgccagctatggcggttagtattgatgtccgcaatgtaccaggtgcaatggaaagttttcccagcgtcttaaagcagttacgcgaacaacagattgactgtaaggttatttttctagatgcagacagcaataccctacttaaacgctatagctcaactcgccgcaggcacccactgactaatgacaactgctcactggcagaagccattgattatgaagttcagctattagcaccagtacaatcacac…	MKLVIISGRSGSGKSSALHALEDEGYYCADNIPVSILDQLPITLKKTHKTPPAMAVSIDVRNVPGAMESFPSVLKQLREQQIDCKVIFLDADSNTLLKRYSSTRRRHPLTNDNCSLAEAIDYEVQLLAPVQSHATVKIDTSPLSVHQIRERMRAECTGSGAKERKITLLIQSFGFKHGVPIDADFVFDTRCLPNPFWVESLRGYSGLEKPIHDFLAAEAEVSDMFNDISSFITRWLPRFESGQRTYMTIAIGCTGGQHRSVYLAETLGKSLKSQLTNKIQVRHRELPEL
180	MAG14_109	MAG14_109_180	452	14	18	30	16	18	28	31	86	34	0	0	0	2	10	0	289	PTS IIA-like nitrogen-regulatory protein PtsN	atgataatcaaaaacatactgacacccgctcgcactctttgcagtgtacgcgggagtagcaaaaaaaaagttcttgaattgatcgctacggctatcagcgaagaaattcctgccatcagtggcaaagccttattttcctctctgatatcccgcgaacgattgggaaccacgggcattggtgatggcattgctattcctcactgtcgcactaagtactgcacagagcctatcggactatttattcagtttgccgagcccattgattttgaagcgactgatcacaaacccgttgatcttgtgtttgctcttattgtgcctgaggaaagctcgcaacagcacttagatatacttaaggcacttgttgggcgttttcaaaccagtaaattactggccaaatta…	MIIKNILTPARTLCSVRGSSKKKVLELIATAISEEIPAISGKALFSSLISRERLGTTGIGDGIAIPHCRTKYCTEPIGLFIQFAEPIDFEATDHKPVDLVFALIVPEESSQQHLDILKALVGRFQTSKLLAKLRGASNSAELYDIITSDA
181	MAG14_109	MAG14_109_181	317	12	16	28	21	10	112	89	123	55	2	0	0	4	9	0	482	Ribosome hibernation promoting factor Hpf	atgcaagtcaacatcagtggacatcatgtcgaagtaacagaagctctgcacgactacgtaaccaaaaaactgcaacgtctgaacgcgcactttgagggtatcactaatgttcaggcgacactgagtgtagaaaagctgattcatcgagcagaagcaaccttgcacatcaaaggtgctgatattaatgcaacggctgaatcagaagacatgtacgctgccatagatcagctttcagataagcttgaccgccagctagtaaaacataaagaaaaatcattacatcaccatcaaggtgctgctggtaagtttcaagcgtag	MQVNISGHHVEVTEALHDYVTKKLQRLNAHFEGITNVQATLSVEKLIHRAEATLHIKGADINATAESEDMYAAIDQLSDKLDRQLVKHKEKSLHHHQGAAGKFQA
182	MAG14_109	MAG14_109_182	1460	57	40	161	27	43	64	134	200	66	0	0	0	10	17	0	819	RNA polymerase sigma-54 factor RpoN	atgaagccatctttacagctaaaaatgggacagcagctgaccatgacccctcagcttcagcaagctatacgccttttgcagctgtcatccctagacctaaaacaagaaatccaagaaatagtcgagtcaaaccctatgctagaagcagaggaggctcacactaccgtagctgatgaacacagtgtagatgaacagccccccaacttgagtgatcagctttcggaaaaatatgaaaaagaagaatctgattggctgccggatgacacaccttcagaatcatctctggagtcaaggtgggataatagctacataagctcatctagccccctacccaatgacgatgctgatgtttatattcgttcatccgtcgctgaaacgttacaggatcatcttgagtgg…	MKPSLQLKMGQQLTMTPQLQQAIRLLQLSSLDLKQEIQEIVESNPMLEAEEAHTTVADEHSVDEQPPNLSDQLSEKYEKEESDWLPDDTPSESSLESRWDNSYISSSSPLPNDDADVYIRSSVAETLQDHLEWQLNLTPMSDRDRLIGLTLIESINADGYLTSNLSDIFKTLKSQLNDLEQDEVIVLQHRIQQFDPIGCASEELSQCLQIQLQQCTLSSTLKKITQDLICNHLQSLGMHDYAGILKKAAIQESQLKEALAVIKTLNPRPGAYIEPPEPQYITPDIIVRKHQDRWQVDLNSEALPKLRINNNYASMVQRADSSRDNTFLKNNLQEARWFLKNLQSRNETLLRVARKIVEYQNNFFNEGETAMKPLVLTDVAKAIDMHESTVSRVTTQKYM…
183	MAG14_109	MAG14_109_183	725	8	5	19	0	4	25	10	36	10	0	0	0	2	2	0	121	Lipopolysaccharide ABC transporter, ATP-binding protein LptB	atggccacgttaatagcagaacaccttagtaaacgctacaaacagcggcaagttgtccgagatgtctcattgcaagtaagcagcggtgaaatcgtcggcttgttagggcctaacggtgctggcaaaacaacctgcttttatatgatagttgggcttatcagagcagacggcggctgcgttaaaatcaataatcaagatttgacctttaaacccatgcacggacgagcccgtgcaggtattggatacctgccacaggaagcatctatatttcgtcgtttatctgtggaagataatattcttgcaattctagaaactcaatcgcaactatcaaaagcagaacgccatgatcaggcagaatctttactggaagagtttaatattacccatattcgtgacagc…	MATLIAEHLSKRYKQRQVVRDVSLQVSSGEIVGLLGPNGAGKTTCFYMIVGLIRADGGCVKINNQDLTFKPMHGRARAGIGYLPQEASIFRRLSVEDNILAILETQSQLSKAERHDQAESLLEEFNITHIRDSLGMSLSGGERRRSEIARALTTKPTFILLDEPFAGVDPISVSDIKAIIRHLQQRGIGVLITDHNVRETLDICEKAYIVSEGHIIAEGNSKTVLSNQKVRDVYLGQHFSL
184	MAG14_109	MAG14_109_184	527	6	9	12	0	0	15	10	16	6	0	0	0	0	2	0	76	hypothetical protein	atgaacctgattaaacctgctatcttagcaataatgcttgctccagcaatagctattgccttgccttcagatcgttatcaaaaaattgaagtggtatctaactctgcgagtcttgatagcaaaaaaggcatttctatttattctggtaacgtcattatgacccagggttctatccggttaaccggtgatacaatcaccctatacaacgataaaaacaatgaaataacccggattattgcacaaggcaagcgagcattttacgaagaaaagctagaagggaagcgaggaaaagcaaaagcttggggcaatacgattaagtataatgttaccgatcaccgtgttgatctgctccagcaggctgagctttctcaagacggcgatctatttaaaggcgaagcc…	MNLIKPAILAIMLAPAIAIALPSDRYQKIEVVSNSASLDSKKGISIYSGNVIMTQGSIRLTGDTITLYNDKNNEITRIIAQGKRAFYEEKLEGKRGKAKAWGNTIKYNVTDHRVDLLQQAELSQDGDLFKGEAIHYDLATQRVNATGQPAGTSAKGRVHMIIQPKPENGKRQAGS
185	MAG14_109	MAG14_109_185	569	2	3	14	5	0	7	3	19	4	2	0	0	0	0	0	59	hypothetical protein	atgttgaaatggaactacccgattactctgttcctactattggtagtattgagtattgggtattgggcttataagggaagcctcgataccacgataacggccacaacgaaaccagacagtcataatcctgattactttttagatcaggccaccatcatcaaatacagccatcaaggtacccttgattacaaattatcgtctgataacatttctcactatcgtaagaataatattactctgctcaaacacccactgatgacgagttatcgcaagtctgggcaggttactaaggcaaaagccgttcatggtaaactgctatcgggccataatacattggtgctttgggacaaggtcgtgatgactcaaacccctgataaagccagtgagaaagtgcgcatg…	MLKWNYPITLFLLLVVLSIGYWAYKGSLDTTITATTKPDSHNPDYFLDQATIIKYSHQGTLDYKLSSDNISHYRKNNITLLKHPLMTSYRKSGQVTKAKAVHGKLLSGHNTLVLWDKVVMTQTPDKASEKVRMDTEYLTILSNKSIAETDAPVLISSKNNIVRAIGMQTFYDKGLIQLKSRVRGINEPD
186	MAG14_109	MAG14_109_186	950	25	13	69	10	10	21	15	25	6	0	0	0	0	0	0	194	Inner membrane protein YrbG, predicted calcium/sodium:proton antiporter	atgatccttgctatttttgctattacattgggttttattgcactgactttgagtgcagataggtttgttaccggtgctgtggcaatagctaggcagtggcatatttcaccgatgctaattgggcttactgttgtttcaattggtacatcagcacctgagatactggtatcaatcatggccgcagctcaaggccatgcagatatagccgtaggtaatgccatcggctctaatattgctaatataggtcttgtcctcggtattacggcattaatagcccctttagtgattaagaaaaaattagcccaccgagaaattccctggcttgtattggtaacattgacggcgggcgccagcatgattgatggttatctcggtcggctcgatagcctattgttaatc…	MILAIFAITLGFIALTLSADRFVTGAVAIARQWHISPMLIGLTVVSIGTSAPEILVSIMAAAQGHADIAVGNAIGSNIANIGLVLGITALIAPLVIKKKLAHREIPWLVLVTLTAGASMIDGYLGRLDSLLLIILLVLTMYLMFRWQSDQPDEIPDEISLSEKLTKRSAWLHLIGGLIILLSSSHLLVWGAVHAAKIMGVSQLVIGLTIVAIGTSLPELAASVMSALRNQHDIALGNIAGSNIFNLLAVFAIPGIISPGHLDSAVIMRDYPVMLGLTLLLALWVISKKTHRISRWAGVFFLMCFIAYEIGLYIQLS
187	MAG14_109	MAG14_109_187	818	28	28	68	20	16	46	18	77	17	0	0	0	0	28	0	357	Phospholipid ABC transporter ATP-binding protein MlaF	atgaccgatgttaatgataactttatagaaattcgtgggcttacgtttcatcgtggcaagcgggtgatattcgataatatcgatttggtgattccgaggggaaaagtggtcggtatcatggggccctctggtacaggaaaaacgacattattacgattaattggcaggcaactgaaacctgaggcgggaaccattacaattgatgggcaagatctaacatcgttatctagaaaagagctttttcgactgcgccgcaaaatggggatgttatttcaaagtggtgccttattcactgatctttcggtttttgaaaatattgcctttcctttaagaacccatactgcactgcctgatgatatgatcagagatattgtattgattaagttgcaagctgtaggt…	MTDVNDNFIEIRGLTFHRGKRVIFDNIDLVIPRGKVVGIMGPSGTGKTTLLRLIGRQLKPEAGTITIDGQDLTSLSRKELFRLRRKMGMLFQSGALFTDLSVFENIAFPLRTHTALPDDMIRDIVLIKLQAVGLRGAAHMMPSELSGGMNRRVALARAIALDPEMVMYDEPFVGQDPIAMGVLVQLIRKLNKALNVTSVIVSHDLNETASISDYIYLLADGHVIGQGTPEEMQQSNDPHVKQFMQGLPDGPVPFHYPAESFRDGLLRGFDDA
188	MAG14_109	MAG14_109_188	794	16	14	41	11	3	28	25	45	18	0	0	0	2	5	0	209	Phospholipid ABC transporter permease protein MlaE	atgacgcttaatctagtagaaaaactggcacagcttggacggattggtttaaatcatcttcagacagccgggcgaacattgatatttttaatgttgtctattttctcacctccctcttcaagaggtggtttttatttactggtacgacaactctatagtgtaggctttctttctcttatcatcattacggtatcagggctttttattggcatggttttggggcttcaggggtacaatatcctggtgcgttacggctctgaagatgcggtaggacaaatggttgcattaagcctagtccgtgagctaggccctgttgttactgcgctgctttttgccggtagagcaggctccgcacttactgcagaaattgggttgatgaaaacaactgagcagttatct…	MTLNLVEKLAQLGRIGLNHLQTAGRTLIFLMLSIFSPPSSRGGFYLLVRQLYSVGFLSLIIITVSGLFIGMVLGLQGYNILVRYGSEDAVGQMVALSLVRELGPVVTALLFAGRAGSALTAEIGLMKTTEQLSSLEMIGVDPLKRIIAPRFWAGVISMPILTAIFNIVGILGGAMVSVDWLGVYDGSFWSGIQQSVSLVNDIGNGLVKSLVFGFVVTWIAVFQGYDATPTSEGISKATTRTVVYASLAILSLDFILTAVMFGEL
189	MAG14_109	MAG14_109_189	467	4	4	9	10	3	14	14	20	1	0	0	0	0	1	0	80	Uncharacterized ABC transporter, periplasmic component YrbD	atgcggatgcgcacaatagagatcagtgtaggcgcttttatgttggcaggcgttctagccatggttgtattggcattgaaagttagcggcctgtcactgcatgcgtcaaacaatacgtatcaggtttatgccatgtttgataacgccggtactttaaagaaacgggcaaaggttgtattggcgggtgtgactattggtaaagttaccgatataacgctggataaaaatagctacatggcaagggttcagatggaaattaattcatcagttaataacattcccgttgacagtacagcctctattgtcactgcaggtttattaggtgaaaaatatgtgagcatcagcgtgggtggtgatgaaaggtttcttaaaaatggtgctcgtatcgaagacacacaa…	MRMRTIEISVGAFMLAGVLAMVVLALKVSGLSLHASNNTYQVYAMFDNAGTLKKRAKVVLAGVTIGKVTDITLDKNSYMARVQMEINSSVNNIPVDSTASIVTAGLLGEKYVSISVGGDERFLKNGARIEDTQSAVILEDLISKVILAFVNKKDG
190	MAG14_109	MAG14_109_190	773	8	11	32	17	12	47	18	62	15	0	0	0	8	10	0	240	Phospholipid ABC transporter shuttle protein MlaC	atgcgtatcagagatttaaagctagcccgatctggattttttgtattagcatttttaatgctgtcatctgggttaggtctatcatttgcttatgctgatgaatactcggcagctactacagcttcacagacattaccttctccaagcaaagaggttgagtcagttaccagagacttactaaaaaattttcaggataatcaggcgtactataaaaaaaataacgatgcctttgttaaagaaacagctaaattgctctcgcctgtaattgcttttgactcagttgctcgaggtgttatgggtaaatatactcgcatggccacccccttacagattaaacaatttacagaaacgtttgaatcgagcttgattagcttttacggcaaagcgctactcaacata…	MRIRDLKLARSGFFVLAFLMLSSGLGLSFAYADEYSAATTASQTLPSPSKEVESVTRDLLKNFQDNQAYYKKNNDAFVKETAKLLSPVIAFDSVARGVMGKYTRMATPLQIKQFTETFESSLISFYGKALLNINGKNIIIEKVDAVPDRVMKDYQAGNISQIPVTMTVKTSDSAVSIAYNMIFDEGRWKLRNIIVDGINIGSQFRRQFAEAVGQYYKNASKETKTNADAIQYVIDNWLGILSGTIKPSDDKAATSAG
191	MAG14_109	MAG14_109_191	287	2	2	12	4	2	7	9	16	6	0	0	0	0	0	0	60	hypothetical protein	atgttgcttgaaactaaagatgcgggctgttttattgtgcaaggagcagtcacctttgataacgcggcacaggttgctgaagaaggtaaaaaggtattagcccgtgcttttacaaataacccgaaagacgcctggtttattagtcttgcagaaatggcattatctgacagttctgcgctttctgtttttttatcatgggtgaggtttgctcaaagtaaaaatacccgcctttgctttaccaatatgcctgctcaatttgaggcactggctaaagtatcagatgtgtat	MLLETKDAGCFIVQGAVTFDNAAQVAEEGKKVLARAFTNNPKDAWFISLAEMALSDSSALSVFLSWVRFAQSKNTRLCFTNMPAQFEALAKVSDVY
192	MAG14_11	MAG14_11_192	1616	3	0	10	4	6	6	10	11	4	0	0	0	2	5	0	61	hypothetical protein	atgaaagctattcccctactttttggctgttttatggccttctttgttaccacggcatattcaaaaagccctcatcttaagatagtggttgaactagcagaagataatgccttaaaagcgatatccatttctccctacaaagatcttaggggtattacttcaagagatgaactattagatgtcctaagctctgcaaaatttagtttgacctatccaaaaacgatattgaaaaaccgtagcattttggcatcagcacaaaaaactactgataagttgtacgatttccaaatgatattactccatacaaaagacgatttagacgatacaaatccaccaacagacatggatatcaccaaatgtattagcctatggttagcagatctatggcataaaaaagag…	MKAIPLLFGCFMAFFVTTAYSKSPHLKIVVELAEDNALKAISISPYKDLRGITSRDELLDVLSSAKFSLTYPKTILKNRSILASAQKTTDKLYDFQMILLHTKDDLDDTNPPTDMDITKCISLWLADLWHKKEHPFCQGEYPEAFNGFKFKMKTMPSKSVSVIQQYNADQAKTSDYSMDDSDAHTDNMYHNELITSQEKFILHPVTVNYFGGDNTPEIDKTITISYQNIEEESIVEDAFKPTHAKPNLEQPNQEAINNNSMASSQPATSQTGDFLCEQCNLEFPNTHHLITHLKTHTEGKPYKCKYCDKCFRNTSNRDTHTRRHHTGEKPFKCEHVDCNRSFTTRIQMRVHTFSHSDQKLFQCIHCEKSFSFPNGLRRHISKHHSLTPPTLMKLLNKIK…
193	MAG14_11	MAG14_11_193	746	33	26	69	17	24	101	70	110	44	2	0	0	6	22	0	524	Phosphoglycerate mutase (EC 5.4.2.11)	atgtataagttagtattgatccgacatggtgaaagtgagtggaatttggcaaatcgctttaccggttggcatgatgttgatctaacgaacacaggtattgagcaggcgaaattagctggacaactcttgcgggaaactgactttgagtttgatcaggtttttacctctgttcttctacgggcaatccgcacggtgaatatcgttctggaagaaatggggcaattgtggcttcctgttgagcgatcatggcggcttaacgaacgtcactacggtgccttaacgggtttagataaagctgaaacagcgatgaaacacggtgctgatcaggtgaaaatttggcgtcgaagttttgatatgccgccaccatcagttgacgaacacagcgaatactttcctgga…	MYKLVLIRHGESEWNLANRFTGWHDVDLTNTGIEQAKLAGQLLRETDFEFDQVFTSVLLRAIRTVNIVLEEMGQLWLPVERSWRLNERHYGALTGLDKAETAMKHGADQVKIWRRSFDMPPPSVDEHSEYFPGKDPRYKGIDWRVLPRSESLALTIDRVLPYWHDVITPNILTGKKVLIGAHGNSLRALVKYLDDMSNTDVLDLNIPTGVPLVYELDKNLRPLSKNYLGDQGDIEAAMKAVANQGNAK
194	MAG14_11	MAG14_11_194	134	2	0	4	0	0	0	0	1	0	0	0	0	0	2	0	9	hypothetical protein	atgctaaataaacctgcatgcgaagagctttgcttgatacgacgcgataaaagtttacctttggcagtcgtatcaggtgtggtggctcagattttataccaattgaattttttcactacgctattgggctattga	MLNKPACEELCLIRRDKSLPLAVVSGVVAQILYQLNFFTTLLGY
195	MAG14_11	MAG14_11_195	593	48	30	100	27	31	87	28	74	40	2	0	0	4	12	0	498	GTP cyclohydrolase II (EC 3.5.4.25)	gtgtctgttaggtttgttgcagaatcacgcctgcccacgccttttggtgaattcattattcatggctttgaagatgaaatgttgggtaaggagcatatagcgctatctatgggggatctctctggcagcaagccggttctagcaagagtccattccgagtgtctgactggcgattcactattcagtattcgctgcgactgtggtgcccaacttcattctgcgctggaaaaaattgccaaagaagggcgtggtgttttgctttacttacgtcaagaggggcgtggcattggcttgctgaataagatcaaagcctataatcttcaggattatggaatggataccgtggaagctaataaggagttaggctttgcgcctgatctgcgcaactatgatatgtgc…	MSVRFVAESRLPTPFGEFIIHGFEDEMLGKEHIALSMGDLSGSKPVLARVHSECLTGDSLFSIRCDCGAQLHSALEKIAKEGRGVLLYLRQEGRGIGLLNKIKAYNLQDYGMDTVEANKELGFAPDLRNYDMCKHIFKHLGVSKLRLMTNNPEKIDALIKQGLIIAEREPHQAGKNRHNERYLTTKAYKLGHLYNKA
196	MAG14_11	MAG14_11_196	503	0	1	0	0	2	11	2	2	0	1	0	0	0	0	0	19	Phosphatidylglycerophosphatase A (EC 3.1.3.27)	atgacatcgaaacctactctttggaaaaatccaattcacttacttgcttttggattcggcagtggtctgtcacccaaagcaccgggcaccatgggtactgttgctgcaattcccttttatctactcatgcagccgcttggtatttggcaatactcgttaatattactgatcactagcactgtgggcgtatggttatgcgataaaacctcaaaagaccttggtatacatgatcatccaggtatcgtatgggatgaattttgtggttattggctcaccatgctagcagctccgacaggctggttatgggtgctgtatggctttatattatttcgcctatttgatatctggaaaccatggcctatcagctggctagatacgaacattagtggggggctaggt…	MTSKPTLWKNPIHLLAFGFGSGLSPKAPGTMGTVAAIPFYLLMQPLGIWQYSLILLITSTVGVWLCDKTSKDLGIHDHPGIVWDEFCGYWLTMLAAPTGWLWVLYGFILFRLFDIWKPWPISWLDTNISGGLGIMLDDIVAGCLALLVLQATVFLLDIRVCHIVNVL
197	MAG14_11	MAG14_11_197	134	0	0	5	0	0	0	0	0	0	0	0	0	0	0	0	5	hypothetical protein	atgaagagggggcttctcaagcttttagttaggccatacccatttactattatgcagaaaaggcaggtggcaaaaaatagagttagcgcatgtcccagcaatcagattaaatataatgccgctttggggttatga	MKRGLLKLLVRPYPFTIMQKRQVAKNRVSACPSNQIKYNAALGL
198	MAG14_11	MAG14_11_198	353	3	2	12	7	6	8	4	10	3	3	0	0	0	5	0	63	Iron-sulfur cluster insertion protein ErpA	atgagcattgttgaaacagtaacgccaacccccattatttttaccgacagtgctgccgccaaggtgcaagagctggtagcagaagaggaaaaccctgggcttaagctacgggtttatgtgaccggcggcggctgttctggctttcagtatggatttacatttgatgaaaatattgcagatgacgataccttgattagtaatggtgaggcacacatggtggtagattcactgagctatcaatatctagttggcgctgaagtggattatgaggaggggcttcaaggttctcgttttctagtacaaaaccctaatgctaaagcaacctgcgggtgtggctcctcgttttctatttga	MSIVETVTPTPIIFTDSAAAKVQELVAEEENPGLKLRVYVTGGGCSGFQYGFTFDENIADDDTLISNGEAHMVVDSLSYQYLVGAEVDYEEGLQGSRFLVQNPNAKATCGCGSSFSI
199	MAG14_11	MAG14_11_199	383	1	2	12	4	2	9	8	6	4	0	0	0	0	1	1	50	hypothetical protein	atgactatacaaggggaggttaagtttgaaggtaccttgcatattgagggccaagttaagggcaatattagctcagatcaaggactgttaacgctaagtagaagcagttgtgttgaaggagatatctgcgtagccagtatccgtattaatggtatcgtaaagggcaatgtttattgttcaaagcatttgctactgtcagaaaaagccatcattaccggaaatgtatattataatgcgatagaaatggctaaaggtgctgaagttaatggtaatttagagcatcttgactcttcggtattacaacaagcagtacccattgatgatctagcgattgaagatagcggttctgttacagtgaacaatgaaagcagtcagataacctaa	MTIQGEVKFEGTLHIEGQVKGNISSDQGLLTLSRSSCVEGDICVASIRINGIVKGNVYCSKHLLLSEKAIITGNVYYNAIEMAKGAEVNGNLEHLDSSVLQQAVPIDDLAIEDSGSVTVNNESSQIT
200	MAG14_11	MAG14_11_200	818	12	7	22	0	3	11	12	25	8	3	0	0	0	0	0	115	hypothetical protein	atgccactaccatcaggaaatgataaccacagagtagtcagttacaaccttaagtggagtatactaattaaactgacattagttgctatttgcattggcggctggttttttgcttaccagtggggaaagcgtattgcgttagaaacgaatggacagctagtgcaacaaaataaagaactaaagactcgcattgctgccgctgatattaagcaaaaaaaacaacttcaaagtatcacactgcttgaaagtgctcgtcagattgataaattggcgctcaataatgtcaggactctggttagagagctagagcaagataaatcaacacttcatgaagagctgactttttatcgcagcgtgattgcgccagaacatgctgagaccggcattagactgcacgaa…	MPLPSGNDNHRVVSYNLKWSILIKLTLVAICIGGWFFAYQWGKRIALETNGQLVQQNKELKTRIAAADIKQKKQLQSITLLESARQIDKLALNNVRTLVRELEQDKSTLHEELTFYRSVIAPEHAETGIRLHEFTLLQGDQPRSFQLRFVVSQISRKNDFRKGEARVNLKGKQGNKAVSLSLFELAGQNSSSLPLGFRYFQILPKKQKFFQFKLPDNFVPEQIDIVINMSSGSVRKLDKVFDWNKELATDVGKHLDLDLGREPEKKERTKAR
201	MAG14_11	MAG14_11_201	620	2	2	6	2	2	0	8	8	2	0	0	0	2	2	0	36	Putative phosphatidylglycerophosphate synthase	atgctagatcgctggacagcccaatgggtgcgtacgccgcttaataaagtggccgtcttgcttgttaagcgtataacacctaatcagctgacattcaccgggtttattgttggcctaacagccattcccttacttgctagtcagttatacttaccggccttggccatgatagctattaaccgattaatggatggtttagacggtgcgctggcacggttaacaacaccaactgatgcgggggggtttcttgatatcaccttggattttattttctatgctggcattgtgttgggttttgcattggcgaacccgataaaaaatggcgttgctgcaaatctattgttattttcatttatggcaacaggctcaagttttttagcgtatgccattatggctgaa…	MLDRWTAQWVRTPLNKVAVLLVKRITPNQLTFTGFIVGLTAIPLLASQLYLPALAMIAINRLMDGLDGALARLTTPTDAGGFLDITLDFIFYAGIVLGFALANPIKNGVAANLLLFSFMATGSSFLAYAIMAEKHKLVDPHFSCKSFYYLGGIVEGTETIMIFILFCLVPTQFPTLATGFAAVCLLTALMRVIAGFQAIKYSESRE
202	MAG14_11	MAG14_11_202	2525	5	4	14	0	2	12	8	38	10	2	0	0	0	8	0	103	hypothetical protein	atgaaaataacagggaggcgctttgtattaacaagtattgcatcattgattgccttacatgtgcagggtgaagacaccacaacggttgcaaccagaactaatgtgccagccggttttgaagcgttatctcaatctcaacggtcactgattgatgtctattatggcaatcgctatattggctctcaattggctacttatggtcccactaccatacggttttctgaccctaccgccctagttagactcattggcaatatcagtgaccctactattgtcatcgaaggtttaaccggcgaactcagtaccaacaccgacaaaatatgccgcagcgccgatcaagccaattgcggcatgatggtgccggcgatcagtggcgttatttttgatgaaaaccgattc…	MKITGRRFVLTSIASLIALHVQGEDTTTVATRTNVPAGFEALSQSQRSLIDVYYGNRYIGSQLATYGPTTIRFSDPTALVRLIGNISDPTIVIEGLTGELSTNTDKICRSADQANCGMMVPAISGVIFDENRFRADVFINQRFLKTRPANVGKYLPPSDADYSFMQMFSATLSGARGDDNNTIDSDDYTFYGTSVFAEGENSLYASWDYSKTQHFSLDAFYGQQDFEGVHYRIGLIDSEGFGFSFTSDRTLTGVRVGSSDNTRIDTQFSGGIPLDVFLPVRGRIEVLKNKRLIASYFMEAGSHQLNTSAFPSGAYDVEIKLLNEQGGLIKTETRFFAKEFNLPPANEWRYFMEAGKIMDRNTDKWLPQMTDQLLVRGGVSRRLTPTTSITTSAAINTEN…
203	MAG14_11	MAG14_11_203	167	1	2	0	0	4	6	3	1	7	0	0	0	0	0	0	24	hypothetical protein	atgcctttattaatttttcctgtatatgaacagggttatttgaaacaaactgttttaaataacccgccgtcaacacagcaacccgaattatcgttattgaaaacgcctttaatgcccatcatcctttctaacgacgctattgctaaccatcaaaacaccaactcttaa	MPLLIFPVYEQGYLKQTVLNNPPSTQQPELSLLKTPLMPIILSNDAIANHQNTNS
204	MAG14_11	MAG14_11_204	311	6	8	2	0	2	16	0	19	2	0	0	0	0	4	0	59	hypothetical protein	atgcatctcaatgccgcagaaaaaaagcagttccgtgctattgggcatgacctaaaacctgtggttactgttgccgacaaggggttaacagaaggcgttgttaacgaaacgttgcgcgctttgcatgatcacgagcttatcaaaataaagtttgtcgtgggtgatcgggcgctgaaacagcagctaataactgaactctgccagcaaacagaggccgagctgattcaaaccataggcaatatggctctgatttataagcctgcgaaaaagccgcatcctatgctgtctaatgtgatgactccgccatcgtaa	MHLNAAEKKQFRAIGHDLKPVVTVADKGLTEGVVNETLRALHDHELIKIKFVVGDRALKQQLITELCQQTEAELIQTIGNMALIYKPAKKPHPMLSNVMTPPS
205	MAG14_11	MAG14_11_205	2306	25	18	70	4	8	30	9	24	11	0	0	0	2	9	0	216	hypothetical protein	atgaccaagaataatagttgtttcttaaaacatatttcatttgtctttttaattaatttttttttatctttatctagtttagtttatgctatggatccacctcagagtccactcgaaacacaagctgaggatccactcgaaacacaagctgaggatccactcgaaacacaagctgaggatccactcaaaatacaagctgaggatccactcgaaatacaacaagaaataatagcaacaagtgtattagtggatcctgaactaaccaattcagataaaaataataataaagaaaggaaagaagtactcctgaagcagatcgatgatttttgtaaaaataaactgtcacacaaggtgcttagaaagtgcgctaaagatagtaacggcgcaagatatttctat…	MTKNNSCFLKHISFVFLINFFLSLSSLVYAMDPPQSPLETQAEDPLETQAEDPLETQAEDPLKIQAEDPLEIQQEIIATSVLVDPELTNSDKNNNKERKEVLLKQIDDFCKNKLSHKVLRKCAKDSNGARYFYKEMSNGRIIAVTFLSLGMGLNLFSIYDGAVAPFVFSTKTEKANTLTLLVKVGATAASMLLATKGVDKLATAVKGSVCGANAKGIADEESVPLQVVTADGESNTEAGKSKKPTNTTKCMFVSDDKAAALTAEIEGDRTYNEMSLHEVNEATYLKDMNRYEPVVEQSDDQKIVMRDTTDNSVKSVSKTAVRLSLAIAALDASFDAFLAAKTGTLIAKNTGSQAVAIVASIVFCVWNFVPGAGCAYLGSTDVGKAVLNAPNKLCSFFRR…
206	MAG14_11	MAG14_11_206	620	38	38	78	16	21	43	56	98	21	0	0	0	0	18	0	429	23S rRNA (uridine(2552)-2'-O)-methyltransferase (EC 2.1.1.166)	atggctagatctaaaagcagtgggcgatggcttcaggcgcatgttaatgatcattatgttaaacgcgcaaaaaaagagggttggcgctctcgggccagctacaaactattggagattcaagaaaaggaccatgttatccagcagggtatgaacgttgtagacttaggtgctgctccaggaggttggtcacaggttgcagttggcttagtgggtgatcatggtcgggttgttgcttctgacatcttagctatagatcctctgcccagtgttgattttatacaaggtgattttacagatgaaatcattttggaaaaaattatccaaaccatcggcactgaccaagtagatcttgtaatctcagatatggcccccaatatgagtggtatgttgtctattgat…	MARSKSSGRWLQAHVNDHYVKRAKKEGWRSRASYKLLEIQEKDHVIQQGMNVVDLGAAPGGWSQVAVGLVGDHGRVVASDILAIDPLPSVDFIQGDFTDEIILEKIIQTIGTDQVDLVISDMAPNMSGMLSIDQPRSMHLVELALDMARQVLKKNGLFLTKVFQGEGFETYLKDVRSSFNRVQTRKPKASRPRSREVYLLAREFKG
207	MAG14_11	MAG14_11_207	2051	103	97	323	70	53	169	116	244	80	2	0	0	10	59	2	1387	Cell division-associated, ATP-dependent zinc metalloprotease FtsH	atggttacggtgggtattatacgcataatagatagccagatttccggaacgaccagcactggcttacaggaagaaggctcaagagagggtagctccttgaatgatatggcaaaaaatctgattctatgggtcataatagcgttagtattattgaccgtttttaaaaattttgatgggatgcattcttctacccagaagattggctattccgaatttgtgcacatggttgaaaacaatcaggtcagcaatgtactagttgatgggtttaccgttactggtcaacaaaataatggcgagcgatttgaaaccaatttgccacctacaattcctgataatcaactgatgaatgaactgttgcgcagcaaggtgcaggttcaagccaagcccattgaaaagcaa…	MVTVGIIRIIDSQISGTTSTGLQEEGSREGSSLNDMAKNLILWVIIALVLLTVFKNFDGMHSSTQKIGYSEFVHMVENNQVSNVLVDGFTVTGQQNNGERFETNLPPTIPDNQLMNELLRSKVQVQAKPIEKQSIWTQLLVASFPILIILAIFMFFMRQMQGGGGGRGGPMSFGKSKARLLPEDQIKTTFADVAGVEEAKEDVQELVDFLKDPGKFQRLGGRIPRGVLMVGPPGTGKTLIAKAIAGEAKVPFFTISGSDFVEMFVGVGASRVRDMFEQAKKQAPCIIFIDEIDAVGRHRGAGMGGGHDEREQTLNQLLVEMDGFDGNNGIIVISATNRPDVLDPALLRPGRFDRQVIVGLPDIRGREQIVKVHMRKVPIADDVDASVIARGTPGFSGAD…
208	MAG14_11	MAG14_11_208	158	0	0	1	0	0	2	0	3	0	0	0	0	0	0	0	6	hypothetical protein	atgccggctgttcaatggttcgaaagtgcctacgaacaggattattgtgttttatatattgcttttagtttaaacgtaattgtctttataaggctgctatccaatttaaatgctcttgctgctgaaaaccattacagcgtatggcgatcatggatgtga	MPAVQWFESAYEQDYCVLYIAFSLNVIVFIRLLSNLNALAAENHYSVWRSWM
209	MAG14_11	MAG14_11_209	1598	6	6	36	4	10	18	6	14	10	0	0	0	2	4	0	116	hypothetical protein	atgcgtaactgggctatggccacggaaaatatattaacggacataaaacaactacagacaaggccatggttctggctagtcgtactgtgtttgtttcagctgatcttttggacgttgagtgaaacgtgggtgaggcattcgcctcatgctgatacgcttgaaggcattgcttggggaaatctgtggcaatggggctatagcaaacacccgcccctagcagcatggctgacagcgctctttgccagttttagtgatagttctgatttacctatttatttgttggcgcaactttcgattgtaacggtatttattgctgtatggcgtcttgccaaagagtatttatcggattatagcgccgtgctagcggtttttttattgctaggcgtactgttctatagt…	MRNWAMATENILTDIKQLQTRPWFWLVVLCLFQLIFWTLSETWVRHSPHADTLEGIAWGNLWQWGYSKHPPLAAWLTALFASFSDSSDLPIYLLAQLSIVTVFIAVWRLAKEYLSDYSAVLAVFLLLGVLFYSNRVERVTPDTIQGPIWALLVLTFYFAVTRVSLTYWLLSGLFSGLALLAKYQAAVLLLPLMLTMLTTTAGKQNLKTWYPWLGALVAIAVIAPHLLWLTKEHFAPVEYFETTYVHSSTGIAPPRWFAHLFHPLEFAVNSFSNVIPLLLLCIPLFRGKKQHEQPQGVLRGSFQQQFLIAVALGPFILTLMLGLFTGKQLIPRWATPYFAWLPLLILVYVKPVITYQRFRTLAICCLALGITFCGLRTAYLYYKPMYKADYWYSDEYLPA…
210	MAG14_11	MAG14_11_210	926	6	11	42	6	18	35	34	27	22	0	0	0	0	6	0	207	Dihydropteroate synthase (EC 2.5.1.15)	atgagcaaatgctttgagcttaactgttcaggaaaaactctcaatttaagtagccccaaaattatggggattttgaatgtcacctctgactcattttatgcagcgagccgctgcactggcattgatgataccttaaaaagggcggaagtgatggcggcggcaggcgctgccattttagatgtaggcggcgaatcaaccagcgccatggttcagcgttatggctataaagacacaaaggatgcggctcgctatgttggcggtatttcggcagaacatgatgtcttagatgtggtttcgtgtgaacaggaattagaccgcatcattcctgtggttgaagcattgagtcaacggtttgattgcattatttctgttgataccagctctgctgctgtgatccga…	MSKCFELNCSGKTLNLSSPKIMGILNVTSDSFYAASRCTGIDDTLKRAEVMAAAGAAILDVGGESTSAMVQRYGYKDTKDAARYVGGISAEHDVLDVVSCEQELDRIIPVVEALSQRFDCIISVDTSSAAVIRESALAGAGIINDIRALNRPGALEAVAATDLPVVLMHSLVDHPEAGFIPHYDNLMMEVTDYLKKAVIRCEEAGIQRHRLIIDPGFGGGLFGKTPDYDLSMLKHFKQFHELELPILAGLSRKSFIGAILDKGPEQRLTGSLSAAIIAAQAGAHILRVHDVAETYDVLRVLQAVNDAH
211	MAG14_11	MAG14_11_211	122	0	0	2	0	1	15	6	5	2	0	0	0	0	1	0	32	hypothetical protein	atgaacatcaacactgcgttagaactgctcgcaatagccctgctattatttatcattttaccttgttctggagtctggctgcctatgctcattatggtagttagaaaatacgataggtattaa	MNINTALELLAIALLLFIILPCSGVWLPMLIMVVRKYDRY
212	MAG14_11	MAG14_11_212	1337	12	20	60	6	22	52	52	124	34	0	0	0	6	15	0	419	Phosphoglucosamine mutase (EC 5.4.2.10)	atggcatgtaaatattttggtactgatggtattagaggtaaagtcggcacgtttcccatcacgccagattttgtactcaaacttggttgggctgctggaaaagtgcttgctgctaaggggaagggcaaggtgctcattggtaaagatacacgtatttcagggtatttatttgagtcagcgcttgaggcgggtctgtctgcagcaggcgctgatgttgtactgaccggacctatgccaaccccagctattgcttacctgacacgcacgtttaatggtaaagcaggtatcgttattagcgcctctcataatccttattatgataatggcattaagttcttcgcaagcaatggcgctaaactacctaacgctattgagcaacggattgaagacttgctcgat…	MACKYFGTDGIRGKVGTFPITPDFVLKLGWAAGKVLAAKGKGKVLIGKDTRISGYLFESALEAGLSAAGADVVLTGPMPTPAIAYLTRTFNGKAGIVISASHNPYYDNGIKFFASNGAKLPNAIEQRIEDLLDDTITVVGSTELGKVSRLNDAAGRYIEYCKASTAPQLDLTGLKIVVDAGHGATYQVGPAVFREMGAEVIQLGIEPNGLNINGDCGSMYPEGLAAKVRETNADLGIAFDGDGDRVIMVDHHGDIVDGDELLYVIAMSRKQEGTLKGGVVGTLMTNLGIEKALEKKGIPLIRTQVGDRYVNEMMLANDWQLGGESSGHIICHDVSTTGDGIVAALQVLKAMKLAQCTLAELRQGISKYPQKMINVTITNRKDVMSVPAISEAVALSEKA…
213	MAG14_11	MAG14_11_213	2882	8	7	36	6	10	19	11	39	8	0	0	0	8	4	0	165	hypothetical protein	atgggtgagataagaacacaaggtttagagccagcagggcaaccttatcagcatacaggaaaaaattcagaaaacgcagtgggtaaaaccagcagtcgtaccgtcaaaccagctgctgttgacccaaccatgactaatgtagtaaacaaccaatcacccgctacagatcgctcggtgcatgagcgaagcattactagcactgatcataaaacgcactatgagacagatctagatttctttgattttcaactcagggcggctcaagagctagcaaaaccaggacccgtgagtgatgatttaattgtttattggcaaagtgatgacggcacaatcatcgcactagaccctaaagataaagaatgccctgagtttttatcgcagttttatgatcaagctaaa…	MGEIRTQGLEPAGQPYQHTGKNSENAVGKTSSRTVKPAAVDPTMTNVVNNQSPATDRSVHERSITSTDHKTHYETDLDFFDFQLRAAQELAKPGPVSDDLIVYWQSDDGTIIALDPKDKECPEFLSQFYDQAKTQFQANSDDIEHACQDQRDKALQSSTATLQQNKEDAPTDYLEVSYHHFFSMVNKEHEWEALLADYSFDKLNDIAVKEVAKKNDEYPKNANRVAPSTKKVSRQHTPKNAKPVNNHQPNNPAKASGTKKDEKLITQVATSNNLKASNKIESPNSAKKNQVSPSANDWNKQQATDTIHAAERQLATKNQPIMPSLPAIMPPKTRQTLVEEAKERAKALAHPTHVVAPNILSTKKTIPVQMKLANINIGQLTNGNFVIIGEKGKYITLEN…
214	MAG14_11	MAG14_11_214	248	25366	14993	68929	4720	7223	16209	9441	8973	14874	542	0	18	279	2339	33	174057	hypothetical protein	atggacttcgccactgagcaagtgggagaggcacagagagtattcggcaatttagagaatatcggccttgaaaagtccgtgattagaaatggctcgaagtccgtaaacccttgtcacatgaggcctgtagcgcggggcgcaggcataaaaaaaggtgaactgagatcagttcaccttcttcaattggtggaggcggcgggatttgaacccgcgtccgccaatcctacgcctttggctctacatgcttag	MDFATEQVGEAQRVFGNLENIGLEKSVIRNGSKSVNPCHMRPVARGAGIKKGELRSVHLLQLVEAAGFEPASANPTPLALHA
215	MAG14_11	MAG14_11_215	356	2	1	3	0	0	1	0	0	0	0	0	0	0	4	0	11	hypothetical protein	atgcaacagcccctgaatgatcaggtttggtcgagcttgaggcagctgttatcaacgcccgaacaacttctcgcacatttgcctaaacagttaactgaaagccctgattttgatctttcgttggttgtgaaacgattaatgaatctcgaagggctgtcagaagaattgtttccggttcatcagaagcggctagtaaaacagttaatcgataaagttacggtgcatgccggccggctcgatattgattttagtctcgaaggcttgatggagctgatcctggaattactagctgatcgcccagaattagtgagcatgtatcggcagctgtattcgtcagcgagaggtcacggactttga	MQQPLNDQVWSSLRQLLSTPEQLLAHLPKQLTESPDFDLSLVVKRLMNLEGLSEELFPVHQKRLVKQLIDKVTVHAGRLDIDFSLEGLMELILELLADRPELVSMYRQLYSSARGHGL
216	MAG14_110	MAG14_110_216	383	0	0	0	0	0	0	0	0	0	0	0	0	0	0	0	0	hypothetical protein	ataaaaatattagattatggttttgccatatcagaaaaaatgtcttcaaattatcttagaaaatcatactgttatctaccccctgaggttattaaacctgatgaaaaagaccatgagaaaatagatgtttattctacaggaataatgctagcaaaacttttttcagataaaaatatgtcccctcttaatgttctttttaataaaaagaaagaaagagtatggaatgatgatgggctcattaataaggcatatatagacattatgttagaaggtcttaattttcctaatgaagaaatcagaaccttaattagcgacatgcttaattataatcccagtaaaagacccactatgcatcaggttaataataggttaaattctatttaa	IKILDYGFAISEKMSSNYLRKSYCYLPPEVIKPDEKDHEKIDVYSTGIMLAKLFSDKNMSPLNVLFNKKKERVWNDDGLINKAYIDIMLEGLNFPNEEIRTLISDMLNYNPSKRPTMHQVNNRLNSI
217	MAG14_110	MAG14_110_217	758	2	2	13	2	10	4	2	4	2	0	0	0	2	0	0	43	zinc metalloproteinase Mpr protein	atgtgccttcccaccatgaaacctacaagagaaacttacagtgaattacaactagcctacgacttttttaacaaaaacttatttgaaaattcactccctgagtgcctgataacattacagcgggagaaacagactcacggctattattcacccaagcgctttattaataaagaacaccatcaaacagatgaaatagccatgaacccttcatacttttcaatcagatctatcgaggatactctttctacattggttcatgaaatggttcacctatggcaagaacattatggccaatcgggtcgaggtcgttaccacaataaagagtgggctaataaaatgattgatttggggttaatgccctcctctactggagcagaaggaggaaaaaaaacaggggac…	MCLPTMKPTRETYSELQLAYDFFNKNLFENSLPECLITLQREKQTHGYYSPKRFINKEHHQTDEIAMNPSYFSIRSIEDTLSTLVHEMVHLWQEHYGQSGRGRYHNKEWANKMIDLGLMPSSTGAEGGKKTGDSVSHYIVNGGAFDHSYKKLTTTQFRLSWADRFPPIKAVSNMITLANVKEGISPALKELHNWGIDVNSIPPEKKQTRAKLSCPDCRANVWGKPSLNIMCGDCGAKYLVADLAENTCDASN
218	MAG14_110	MAG14_110_218	554	6	0	1	0	0	0	4	8	2	0	0	0	0	4	0	26	hypothetical protein	atgaaattcaatcaagactcaacctatgaaaaaatacaatccttatttgatcaacttaaaggaaaaaaatatctctctgtaaaagatggtatgcctcaacaagacgaaggaacatatttaaatgttttttcattagaaaaatctggtgaacattactatttattaccttgtcctatttttaaagaaaattatgtaaatggtaaatttgtatactggcattgccctccaattatagattcccatatgtatatatttgtcattttacctgaatatccctgttcagtatttgtaggaactgaaacagcttacagcccacactatcaatattgcctagatggacatacatcaattagtttaaatcttgatgttttatatgccggatctcttagatttcaacaa…	MKFNQDSTYEKIQSLFDQLKGKKYLSVKDGMPQQDEGTYLNVFSLEKSGEHYYLLPCPIFKENYVNGKFVYWHCPPIIDSHMYIFVILPEYPCSVFVGTETAYSPHYQYCLDGHTSISLNLDVLYAGSLRFQQSKLLAWSNMSGHYKPESSDRFKQLTPNVKRILPEEKFYNLRDFLITKPWEN
219	MAG14_110	MAG14_110_219	1037	0	0	17	2	0	0	2	16	2	0	0	0	0	6	0	52	hypothetical protein	atggagagtaataaaaagccgctatccatccaggagcgggttaataaaatctgtaatgagatatacgccaaaggtgagaagccttcagtaaggcttgttcttgctgaactgccagatgtaaatagcacatctactgtccataaatattttgccaactggcgctcagaattggaggccaatcagcagtccctttatgaccgcttaggcttctcttctgagtttactcaatcctttatgaaagagatcacccgctttggggctgaggttgaacagcggtataaacaattagctaaagatgccaacgagcaaagagatttagcctttgctgacctagccagaacagaagaaagtctgcatcaaaaggaagtgatagttgagcaacacaataagcaggtcaag…	MESNKKPLSIQERVNKICNEIYAKGEKPSVRLVLAELPDVNSTSTVHKYFANWRSELEANQQSLYDRLGFSSEFTQSFMKEITRFGAEVEQRYKQLAKDANEQRDLAFADLARTEESLHQKEVIVEQHNKQVKTLQAELQMLKQQKETELDKARESNDAAIQEVRQQLATALEENKALSQHNETLRTAMTKSELKLEGNEELINEIKHQNKDLVDENKKLNQSITELSKNLVGKEAAIEGNEKLIISLQEQQQQIAQQLADEKERRQKLDEDLLALKTSVIDTQKKLEKEEIKVSEAQSKANELKYEIEQKSIERKETIRRLEHSVASYEKLIAHMENQKKTSDA
220	MAG14_110	MAG14_110_220	1220	18	12	28	6	16	10	30	35	8	1	0	0	0	10	0	174	hypothetical protein	atgtcaaacgatatttcaatcaataatagcggacaagctatcgctattactgatatgcgtgatgatcacacagaacagattacaccgttgatcgacgcaataaccgatgcagatgcaatagaagcttttcttgagcgtaaaaacacctcaggtaagcgggcgctttcacaaagcacatatactaattaccgacgaaattgctacttattacttgactactgtaatacggttcttagcgttaaaaaaacgttatctaaagtcacgctggatgatgctcaagcatttgctacttatattgcttttcctccaccaagcaaagtcggttacgctaagcggccttttggtgaggcaggctggaaaccgtttgttgttaagaagggctggaaagcaggtgatcgt…	MSNDISINNSGQAIAITDMRDDHTEQITPLIDAITDADAIEAFLERKNTSGKRALSQSTYTNYRRNCYLLLDYCNTVLSVKKTLSKVTLDDAQAFATYIAFPPPSKVGYAKRPFGEAGWKPFVVKKGWKAGDRALSETSVNRTIAGLKSLYSWMQKTGFVQLNPFALLDTNTQERKLQEAKSKDRIIQMPNLKAISRWLGENEQSALESKNQKIIRDAQRKRWLFFAYLTSGLRISELLTNGSQSLQQEYIQGKSYWTLNIIGKGNKPAQIPVAKKFIDEFSKYRLGLGKSEQPNPLLNEPFFYSLSGNKPIRCRQTLYNNFKEMMASVANGLHDAGLLMDALKVRSASTHWLRHSFVSIGIDQSQDIAIMSELARHSDLKTTMGYNKSNIIRMSSVLD…
221	MAG14_110	MAG14_110_221	182	0	0	2	2	5	0	0	0	0	0	0	0	0	0	0	9	hypothetical protein	atgagtcaaaaaataacaaaatgcctatcaatcgctaaagtcttgatattgcatttagcgctgatctcaccatcagtctttgctgtatcaatgactaacccttctatagaaaaaaccaatattttagattcggagcatgaaataaaattagcaggattttcattttttaataatgatttttaa	MSQKITKCLSIAKVLILHLALISPSVFAVSMTNPSIEKTNILDSEHEIKLAGFSFFNNDF
222	MAG14_110	MAG14_110_222	182	0	2	0	9	1	0	2	3	0	2	0	0	0	0	0	20	hypothetical protein	atgagtcaaataataaaaaaatgtctattaggctataaagtactgttgttgaatttaatacttatttcaccaacagtctttgcggcatcaatgactaacctacccatagcggaaagaaatattttagatacagagcatgaaataaaattaggagaatacataaacctgtggagcgaatattaa	MSQIIKKCLLGYKVLLLNLILISPTVFAASMTNLPIAERNILDTEHEIKLGEYINLWSEY
223	MAG14_110	MAG14_110_223	182	0	2	0	3	3	0	0	0	0	0	0	0	2	0	0	25	hypothetical protein	atgagtcaaataataaaaaaattcctatcagtctataaagtgctgttgttgaatttaatacttatttcaccatcagtctttgcagcatcaatgactaacttacccatagcggaaagaagtattttagatgcagaacatgaaataaaattaggagaatacaaagacctgataaacgaattttaa	MSQIIKKFLSVYKVLLLNLILISPSVFAASMTNLPIAERSILDAEHEIKLGEYKDLINEF
224	MAG14_110	MAG14_110_224	119	0	0	0	0	0	0	0	0	0	0	0	0	0	0	0	0	hypothetical protein	atgacaatcacgaaaaaattgttaatatggcatgaacaactgtattatcagcgatattccatgtattttaaaaatgaattcaacaataattatcgctcatctaaaaagctaccaccttga	MTITKKLLIWHEQLYYQRYSMYFKNEFNNNYRSSKKLPP
225	MAG14_110	MAG14_110_225	1232	5	0	6	0	4	0	2	4	10	0	0	0	0	2	0	34	hypothetical protein	gtgagttattcccatattcgatacattgcttatcatcttcctaccattggttatagcaataccggtggtgttcaatacagtttgcctgctgggctattactaaattctcaggaacagcaaaccatctttgaaaaagttcctgatatgaaagtagcagcagatattgtaaatagagagaatgtgctatcgggtaagcctcctatttatatggtgaatctttcaggcagctcgcaggctgtgaggcttgttaaaagcgatgcagatattttttctcgtgtacagcgttttttaacagtacttgagctagctgcttctaccgttaaataccgtaaagatcttaaaaaagatggtgtccttaatttatttgcggcacctgagttttactttcgcccacctgaa…	MSYSHIRYIAYHLPTIGYSNTGGVQYSLPAGLLLNSQEQQTIFEKVPDMKVAADIVNRENVLSGKPPIYMVNLSGSSQAVRLVKSDADIFSRVQRFLTVLELAASTVKYRKDLKKDGVLNLFAAPEFYFRPPEEPHSYTEQMYRAIAEVLMETIAQAKGLEHWLIIPGTIMWTKQQLDIDYLEGTSKRILIDQNTTYVINGSTALGGGQQINKYLPSSIDGLPSQRLAEGKKIKGVEFDGDWLYRAEYLKRQDIWASFSDHIVSFGGIRIGIEICRDHGILKAHPKTTGDISAQVIISCGRRLLTSHIATVMGGVVMRCDGHHGSGIRWDQRFVTRYTDIPNGSDRWDDKAKAELTPTDQDLMSNPNPFIQIDLPFNANHPLYWQPSKTVDKSDWNKYK…
226	MAG14_110	MAG14_110_226	4577	8	16	22	2	6	9	29	14	14	2	0	0	0	2	0	124	hypothetical protein	atggacttcgcaacccttcagcaatacttttctattaaaaataacaaactaaatagaagcacactgtcatttaataaaaaggatttttctggtgaattatcagactttttttctctttgctatcagggttactctcttaatctcagtcaactgaacttgatcaggattgatgaagagcaacaacaaatagaaatagcaggaatcgcatcttaccttaatatgccaaacattagtgcaaccctttattgttggctggataataagcagcaagttcaattgactattatttatccactgctgggggaaaaccctaacgccaataagtggtctttttcaaaaagctttcctgatttaccacaaacacctgatgaaacacagcctttactatttgatcgtgaa…	MDFATLQQYFSIKNNKLNRSTLSFNKKDFSGELSDFFSLCYQGYSLNLSQLNLIRIDEEQQQIEIAGIASYLNMPNISATLYCWLDNKQQVQLTIIYPLLGENPNANKWSFSKSFPDLPQTPDETQPLLFDRESGESWQKHRIFLDDIAFFNAAFIVSSCNGMTPDRQYPLKKGINFIASVYPEGPLAIAKHAFNINGALSVLGHIRLPMKGETTTKLRTQFMNTGGNYLFPWHVQNHIEYGLPGILLTVAVGIHDNFGENILRFSGDSLLIYTPISDDWVIPSTNPAFRPIQAFSGSLSLPGANINTAITLPFEPGINQWFGIAYCQGISIKNLSEMAMLSGSHDGFSSHIPKQLQALSKEFGRLELSGFSLLVDFSNLKAITVKRITVEVGIPELNW…
227	MAG14_110	MAG14_110_227	302	0	0	4	0	2	0	2	2	1	0	0	0	0	0	0	11	hypothetical protein	agaacggtcgctattcatgagttaacacatgcatggtttttttataataactaccgaagccttcctcttgaagtagaagaaggtatgtgtgttttaatggaatatatctggcttaagaatcaaaaaactatggatgcaaaatatcgccagactgtcatcgttaaaagctcagaccctatttacggagatggttttcgtcaagccagagccgctctaaagttaatgcctttaaaggttctattacggtttttgcaagaaaaaaataagttccctacacggttagctgcatttttttatcattaa	RTVAIHELTHAWFFYNNYRSLPLEVEEGMCVLMEYIWLKNQKTMDAKYRQTVIVKSSDPIYGDGFRQARAALKLMPLKVLLRFLQEKNKFPTRLAAFFYH
228	MAG14_111	MAG14_111_228	164	3	0	14	5	3	11	4	21	2	0	0	0	0	1	0	64	Mobile element protein	gtgatatctgagcttgttcaccatgaagacttccatacaagggaagaggcgaagcaggcaatttttgaatatattgaggtctattataaccgccagagaaaacactctggcaatggctacctggcacctttcaaatatgaacaaaaaattgccgaggcagcgtaa	MISELVHHEDFHTREEAKQAIFEYIEVYYNRQRKHSGNGYLAPFKYEQKIAEAA
229	MAG14_111	MAG14_111_229	638	2	2	10	8	11	10	5	12	10	0	0	0	0	2	0	72	Arginine exporter protein ArgO	atgtatttgttatttccatttataaaaggcctaggaattggcctaggtatgattgtgcctattggtgcacagaatgcttacttaatcaatcaaggcattcgtcgtaattttcatatattagcggccatcacctgtacgatttgtgatgtatcactgattgcttttggcatttttggtgcgggagagcttatttcaaaaaatgcaacttttttacagattataacagtagtaggtattgtttttttaagctggtatggatttacctctttttgccgcggatttcaaataggcaataaagaaaccatggcattcggtaaaaccaagctattaacaaaaaataaacgcgatgttcttctgggtgcgttagctgtcaccctacttaatccgcatgcttatctt…	MYLLFPFIKGLGIGLGMIVPIGAQNAYLINQGIRRNFHILAAITCTICDVSLIAFGIFGAGELISKNATFLQIITVVGIVFLSWYGFTSFCRGFQIGNKETMAFGKTKLLTKNKRDVLLGALAVTLLNPHAYLDTVVILGGIGNQMHQELRLAFALGTFSASIIWFFMLTTTAAKFAPWLSKPPVQRTIDILVAVVMWAIAVSLVNRLFIVG
230	MAG14_111	MAG14_111_230	128	0	0	0	0	1	1	0	1	2	0	0	0	0	0	0	5	hypothetical protein	atgatattaaaaatattatttttactcaactgtagttcaggtcatataatccctctgcaagatctcacagagatcattgccattgcatctgatatctgcttactctggctgttgatgcttatcaaatag	MILKILFLLNCSSGHIIPLQDLTEIIAIASDICLLWLLMLIK
231	MAG14_111	MAG14_111_231	896	13	4	17	8	9	25	12	30	10	4	0	0	3	4	0	139	Transcriptional regulator ArgP, LysR family	atgaaacatatagattataaattagttgcagcgctggaagcggtggtaggtcaggggagctttgagcgggctgcgaatcaactttgtattacccaatctgcggtttctcaaagaatcaaacagttagaacaaataatggcacagcccttaatggtacgcagtcaaccgccaggtcttaccgaagcaggccagaaggtattagggctttatcagcgggtggcgatgcttgaaaaggatttgctaaatgatatcagccaccaagataacgaacagcatgttgccatgactctagccgttaatgctgactctgtcgccacttggttattacctgggttagccacgttattaaaagatgaaaagattgaattgcgcttgcttgtggaagatgagtctcgctgt…	MKHIDYKLVAALEAVVGQGSFERAANQLCITQSAVSQRIKQLEQIMAQPLMVRSQPPGLTEAGQKVLGLYQRVAMLEKDLLNDISHQDNEQHVAMTLAVNADSVATWLLPGLATLLKDEKIELRLLVEDESRCLDKMRRGEAVAAISTQAHPLPGCQVTYLGEMRYLCVCSPDFIKRYFSKGVTRETLTKAPVIAFDFLDDIHHNFLQTHFDLPHGTGPCHIIPSSEAFVVMAKAGVAYCMVCELQVKQELDSGELVNILPNLQDSRPLYWHHWVLETGRLKMLSQQVIKYARQALHS
232	MAG14_111	MAG14_111_232	821	10	10	44	9	17	50	31	46	13	0	0	0	2	34	0	266	Purine nucleoside phosphorylase (EC 2.4.2.1) @ N-Ribosylnicotinamide phosphorylase (EC 2.4.2.1)	atgtttaatttatatgatgaagttattaaatctgctgaaacaatcagaaaaggcataccttataatgctaaggttgctgttattctgggttctggtttgggtgagctaacaaatagcataacaaaccctatctattttagttatagtgatatacctaactttcctatctcaactgtgaagggccatgcaggccaacttgtttttggtaagattggtgatgttgacattatggtgatgcaagggcgctttcatttttatgaaggctattccatgaaagaagtgacttaccctttgtatgttatgaaagcattaggtattaaaaatataatgattaccaatgcagcaggtggtattgataaaagtcttaatccaggctctttaatgctgattactgatttt…	MFNLYDEVIKSAETIRKGIPYNAKVAVILGSGLGELTNSITNPIYFSYSDIPNFPISTVKGHAGQLVFGKIGDVDIMVMQGRFHFYEGYSMKEVTYPLYVMKALGIKNIMITNAAGGIDKSLNPGSLMLITDFLDMVGTNPLIGPNDERFGVRFPDMSQPYSYTLLNLAKKVADQLNITYKQGVYAGVAGPYYETAAQIRMLANAGASAVGMSTVSETIVANYLGIKVLGISCITNMATGIATTNHSHESVMEVANKASSDFCRWIAALIPKI
233	MAG14_111	MAG14_111_233	1346	8	14	32	10	13	18	10	28	12	0	0	0	1	8	0	154	Multi antimicrobial extrusion protein (Na(+)/drug antiporter), MATE family of MDR efflux pumps	atgaaaacaatactatcacataataatacttcgcttgctgagcagcctgtaaacaagctattttggcattacacattaccctccgttatggctatgttggtgaacgggctttattcaaccattgatggcatatttattggccagattgtgggtcagcaaggacttgcagccattaatctagtctggcctatcagcggtttcataataggcatcggcttgatgattggagtgggagctagcgctcagcattcaatttttcgaggcaagggtcacgatggtaaagctaagcagatggttggtaacgcactgataatcttatgtatctccagtttactattatcaataatcatttttatttccagctcctccatactttcattgataaaagcccaaggtagt…	MKTILSHNNTSLAEQPVNKLFWHYTLPSVMAMLVNGLYSTIDGIFIGQIVGQQGLAAINLVWPISGFIIGIGLMIGVGASAQHSIFRGKGHDGKAKQMVGNALIILCISSLLLSIIIFISSSSILSLIKAQGSLYAIAASYLHYVGIGTFAALAGAALPMIVRNDERPYLATGIIASGAIINIVLDYIIIARLRQGVPGAAIATIVAQLFTVLWCIVYLFSKKTKLRLKIKDLGFNFYYCQKILKTGLPSLMMSMYLSFVLVVHNRLFLTYGSTVSVAAFAIVGYIQVIYYMVSEGIANGMQPIVSFNMGAKNQKNMHTALQLGVLTVLISGIVIVVLIDLWPDKVASLFIMSNVDLLAETVRGLKLHLATMYLEGFIVVVAAYFQALGNYKTAVCITM…
234	MAG14_111	MAG14_111_234	2615	0	0	8	0	4	0	2	12	4	2	0	0	0	4	0	37	hypothetical protein	atgtcaaatggcatacagggaacaagtaaccaaccagtcaatcttgatacatcgtcgatagatgaaaccggaacagcaaataaggctgttggaagtggtttaattaatagtgatgctaagcttcagatgatgcagtctaagaaagccatcaccgggtcacaattagcacaccgtcccacgctattaaagccaaaagacataggaatgaaagcacaagcttcagctaaccaggctgcaagtaatgatttatccgggttaggaaaaatgacagaggctgcttcatctaaagttgcggctgctatgatgcgtgctcaggtaggcatgcaaacgcctgaggatcagaatctatttcgccgaaatgcaaagatcttagatgacggtgctgattatattgatagt…	MSNGIQGTSNQPVNLDTSSIDETGTANKAVGSGLINSDAKLQMMQSKKAITGSQLAHRPTLLKPKDIGMKAQASANQAASNDLSGLGKMTEAASSKVAAAMMRAQVGMQTPEDQNLFRRNAKILDDGADYIDSLFKGNNQLSKNEKTNILGGQGFNDQQIEDLLLSQSDQAGVKSKIQKKHGDTYHQNLADLKKMGYDEDQAKLLLILGDDNIIKNDKRKLEISGHFKGNNNAQNLAKMGFNQNQINDLLNGKQAAQGQTKSRTANEHLSSLNQKMGFSEKEAKILLASAQSEKANEQSNLIKRLQKNHTQVSNNMRRLSKNAQLMSNSPSKPFLEEHLKQQADIFMVLELIHEMSVKQRRFGREMRQLEHDSAMKETLKQADHIRKAAVMQLAADCVS…
235	MAG14_111	MAG14_111_235	1655	0	0	0	2	0	0	0	0	0	0	0	0	0	0	0	2	hypothetical protein	atgtcgtcagtaggccaaacaggagataattcagtaaatgtttcaggtttagaccagaaacaagttttaaatccagtggatttttttgatgagcatgttaagagaggatatgatggtaaaatatcacaatcacataatgatattttattagaagaaaaaattcctaatacccatcgcttaacaaggcctaaagtagaatcctttgatgttaatgatcttaggaaaatgcaagaaatattattaaaatcagaagaatctatagctcagtctaatgatataaagaatatcgccaaattaaattttgaagatgacctaagccctgaagctaacaaaatcaagaatgatttaaagattatgcaaggtgttaaagaattagaaaatatgcttggccataagctt…	MSSVGQTGDNSVNVSGLDQKQVLNPVDFFDEHVKRGYDGKISQSHNDILLEEKIPNTHRLTRPKVESFDVNDLRKMQEILLKSEESIAQSNDIKNIAKLNFEDDLSPEANKIKNDLKIMQGVKELENMLGHKLEESKKNELLKFMAESATLSKLSETEDIKSSEIENKKTSSSLVEKDKIDKQNNKTTESKEIKKQVDGNNDTDKIWDDIWLYINGNTSDDETINFSTEEKKQLAQAQNNFNLVFDKNGYADISVKVGAIIDGPKKLIGEIKSDFSKLTRLMSGDGQLWDTDEITTILSGIQQKMQDNRLKFDQETIKIGQVEREQVSKETINKLREQIKKDEEARNASWISRIFGFIALAVMAVATAAAFATGVGAVAGAALIAAMAMMVVMTVDQEM…
236	MAG14_111	MAG14_111_236	473	0	0	0	0	2	0	2	5	0	0	0	0	0	0	0	9	Type III secretion chaperone protein for YopD (SycD)	gtggatgttgaaaacttaatatcagaaaatgacgataatatttacgaacaggtttttcaatttttcagtaaaggaggaactttcaaagaccttaaaaacatgagtgaggaagcaatggaggctatttattctgttgcgtatagtttatatgaaagtgcgaaatatgatgagtctttaaaaatatttcagtttctttgtttctatgatcattttaataaaaaatattttatgggcctaggtgcttgtcagcaaatgcttaaaaattatgatagcgccatggaaatattttcttttgttacagtcttagattctgaagatcctcgttctatggtttatcttggtgattgctacttggccttaggtaaaaataagaaagctgaggaatcatataaaacagct…	MDVENLISENDDNIYEQVFQFFSKGGTFKDLKNMSEEAMEAIYSVAYSLYESAKYDESLKIFQFLCFYDHFNKKYFMGLGACQQMLKNYDSAMEIFSFVTVLDSEDPRSMVYLGDCYLALGKNKKAEESYKTAIIWSADNPEYDQERQRATNMLENI
237	MAG14_111	MAG14_111_237	887	0	2	0	0	0	1	0	1	0	0	0	0	0	0	0	4	hypothetical protein	atgtctacagcgggtacaaatatcttaccaagtacaatttttgataattcgttggatgataagccaaatatttatttggaaccagagttaaaagatcaactaaaaagcgaacttaatttaaataatgatcaacttaatgctttgattactacaagtggccatgacattttaaatgaagttatgaacccgattggtttaaacaaagaagtaatggctgcacttgatagtgctgataaactgagtccaataactaaagaattagttaatatcagagcacctattgctatgacatctgaagttagcaaccctaataattggcaaaaagatcagtatattgggcctggttcaatgtttgttaataattttattaatccaactcctttggaattgccggttgat…	MSTAGTNILPSTIFDNSLDDKPNIYLEPELKDQLKSELNLNNDQLNALITTSGHDILNEVMNPIGLNKEVMAALDSADKLSPITKELVNIRAPIAMTSEVSNPNNWQKDQYIGPGSMFVNNFINPTPLELPVDDFEPPINLKKVSIDALVMSVLTKRAEIIEVQLRDQISSIQLKNSELEVSNDFLARSKEGKANAGDNTSTFTDEFIEYWESIGAEYQRSDRDGGVPGLQHRSADWDVNIEGLKAKIEALTSQSQLETTKLQQTINKFNQAFEMLSNFINKYYQSINTIIQNLR
238	MAG14_111	MAG14_111_238	1166	0	0	26	2	5	0	8	14	6	0	0	0	0	8	0	69	hypothetical protein	atgtttcctttgtctcatctaaacttctatataaataatgcgttgattatggaaatggattttatggatcgctcaggaaatataccacccacctctcaaggtttaatggaaaatctaacaaaagaccaacaaccaagtagaggaaatgtacacacagtggatcctgttatcaacatttcacgaggaaaagcggaagagaagcaggatagccctctatcagagcgaaaagttagcaaagaaaaaagcctaggcccttctgttatcaaggctcctaaacataaaaaaccccatgataattatggctacatgggtggaggagctgccgcgatgatggcaggtgcttctatcttagctctcgttcctccagtagctgtcataggtatacctatttttgttatg…	MFPLSHLNFYINNALIMEMDFMDRSGNIPPTSQGLMENLTKDQQPSRGNVHTVDPVINISRGKAEEKQDSPLSERKVSKEKSLGPSVIKAPKHKKPHDNYGYMGGGAAAMMAGASILALVPPVAVIGIPIFVMGLMAFAYSFCNFDQPQQEFNNQQQENDKKQRDKDDKDKRDKDKSSSGNAISDEADGKFIGRPVVDFSGGKVKFPPNNPQPIDPPPFKEGYVGPNWEQIYNAATMLGMPPVPANQFMNACFEHLGDISSQPDNSKPEDVLNMPLAMEYANKEQLTAGDKQGKMPKITGIDSMFSPPAIVSDIGSSQESPVIINEIYMGEEHGSTHEDNDSLTQEATLPLNMKGVIPAESIAQIKEKATRIEEKAKKESEKYFDDDH
239	MAG14_111	MAG14_111_239	176	0	0	3	0	3	0	0	2	0	0	0	0	0	0	0	8	hypothetical protein	gtcaatgcttatcatagccaattgaaaagctggataaataactggtttaaaggtgttgcaacaaagaatctctcaaaatatctgggctggaggcgagcattgactggtggaggactgacgctgtcttcttttatcgaaaaaatagcggggcattgggtttatcaactaccgagctga	VNAYHSQLKSWINNWFKGVATKNLSKYLGWRRALTGGGLTLSSFIEKIAGHWVYQLPS
240	MAG14_112	MAG14_112_240	866	0	0	0	0	0	0	0	0	0	0	0	0	0	0	0	0	hypothetical protein	atggcagaacaaccctttaaggtcgaagcactcgacatcaacacgctagagctcacggacaattccggtgcgctagagattaatggcgaagcgattgcgatggcttcggacattgcgctatcggattacagtgcgctaaccattacaggcacagggtcatttgacggggcttacacacgtaatgccaaccagttctcactggatggcgatacagcgtttagcggcaatgcgttattcaacgctaactcaggctattattatttcattaaagatggtgacaatacgaccgctgtcatctattctgaaggggatacagcttgggcagcagtagcgaaggcgggttttgatttctcaactattgctgataatgatccactcggctcaccgaatagcgtaagc…	MAEQPFKVEALDINTLELTDNSGALEINGEAIAMASDIALSDYSALTITGTGSFDGAYTRNANQFSLDGDTAFSGNALFNANSGYYYFIKDGDNTTAVIYSEGDTAWAAVAKAGFDFSTIADNDPLGSPNSVSTFGNDSTAYENGVNQPTANATFVYGGSNSPIGEALAGKEPTITAGTTSQYWRGDKSWQTLDQTAVGLANVDDTSDADKPVSTAQQTALDAKASSATLASNANGDGASLIGIEDADGRYNATEVEGALAEVKALADQNSLGLGAFWGEVVTAATSNV
241	MAG14_112	MAG14_112_241	701	0	0	0	0	0	0	0	0	0	0	0	0	0	0	0	0	hypothetical protein	atgacgtggtatttcgatacagtaaaattgacacaagctattccgtatattgatttcccagtcgataatcagccggctaccatagcgacaatgacagatgatacacatccttatttaacagaccctacatggttagcgcctgatggaactaacacgctaggttatgatgtagggtggtctggtaccgatgttattcgtgttgctgtcccaccacctgtttacacacccgatgaactgcgcggactagccactaccggaataaaagattcacttgttaattttgtgcaatcgtttatcggtaacacgaatgcgaaaacaagcgctgaaaatgtattaacctatatctctgaactaacagattacatagcacttagcgacgaacagatagttaatgctgaa…	MTWYFDTVKLTQAIPYIDFPVDNQPATIATMTDDTHPYLTDPTWLAPDGTNTLGYDVGWSGTDVIRVAVPPPVYTPDELRGLATTGIKDSLVNFVQSFIGNTNAKTSAENVLTYISELTDYIALSDEQIVNAELPTLDIVDPVLTISAGQTLRVHCAAPNITSGRVSLDIINGDAIYHTCVRLYKLSVSSDDWMFDQSALSGVKPAIELSVTNGNLLVTNNEATDIQVTTYIG
242	MAG14_112	MAG14_112_242	1592	0	0	0	0	0	0	0	0	0	0	0	0	0	0	0	0	hypothetical protein	atggcacatgtaacgatacccccatacgcgccgattacttacacggccacggcgtctcaaactgatttcccagtaccgtttcctttctttgatgttgagtcacttaaagtatatcgacacaacgctggaacggaaccggaggaatcagacttattggttcaaggtaccgactatactgtgacgaatgttgagaacccgaaccaaggttctgacaacgccatggttgttttagcatctggtgctacggctggtgatctttatacgctaagacgtgctatgacgtttgagcgtaccattgattaccctaattcatcacaaccgagaggcgatacacttaataccgacttcgatagactatggattgctacccagcagaatcaatatctatttgagcaactc…	MAHVTIPPYAPITYTATASQTDFPVPFPFFDVESLKVYRHNAGTEPEESDLLVQGTDYTVTNVENPNQGSDNAMVVLASGATAGDLYTLRRAMTFERTIDYPNSSQPRGDTLNTDFDRLWIATQQNQYLFEQLTGYTIDNPSPSPIPVFPTASAGLGLVWDTTGNVLVNQAFPNEAVGITYDDTSVPFTAANVQVALDQTNVRIDGLAPGGDPLTDSNIADQADLNAGTADQVLDAALIKSGGFFQTDSLNTLTSYTGLTTAPSNSTHLLTPTSTNRPSDVDPDDYVATVLGIQATGSRVVAIRSYGSTPRSFLMLWNGTAWTVKKIATGAADGTITAGSENWISAGDLNEFGLGTQNPPVQNNWNVLNDVNANRLIQVSPSASNLPAGSPTGVGSAGF…
243	MAG14_112	MAG14_112_243	4535	0	0	0	0	0	0	0	0	0	0	0	0	0	0	0	0	hypothetical protein	atgtttgaaaagctattaagtaatttagagcgaaaagcttctgaagttgccaagaaaactgttagtaaaaatgaatctgatccgtctgtatccgtaaatgctgacgggtcagttacacaacagcaggacaatgctgcgcacgaagccggtgcagcgcatgctgtattagacgcgataaaccatccagaagaaaacaacctgatggctgaggccgctaagcagtttgagcaagatgcagcgaataagcaagagggcgaagcattaaagaaagttgctgaccaatctattaagaataaagaacgcgtcaaaagcatgatgggtattggtacggacgttgataaaacggccgaatacctgaaagatttacaaagcactaaacccgtgacaggtgataaaccg…	MFEKLLSNLERKASEVAKKTVSKNESDPSVSVNADGSVTQQQDNAAHEAGAAHAVLDAINHPEENNLMAEAAKQFEQDAANKQEGEALKKVADQSIKNKERVKSMMGIGTDVDKTAEYLKDLQSTKPVTGDKPPEIRANLSQLNVGADTDYGDLTRRLLENNKEIFSYYQNKQSLPSMVEDAQKYGLDNILNDILARDPSGKIDEKQTIGGIILTGQMHKQAQEALTKANLPSATLNDTLDAAQKSSAASLMHAAVSGQNSQAGRMLGALSVVQKTLDLAKPISQDQIDATLNLQSLIQNISKEKDMTGKDMLTGAINNPMAQAEGEAGQSVVDTLKNNQIRDIARLLDDPEKADQVIAAAQDPAMRDKVAQSKAAQRLLNDAQRIKDDPEGAQKILEA…
244	MAG14_112	MAG14_112_244	887	0	0	0	0	0	0	0	0	0	0	0	0	0	0	0	0	hypothetical protein	atggctgatttagaattgatcccgcagccccatgaccagtacaccgtatcaccaagcggcggtacaaactcatccggtcaacaagatgccgaaacagattacgacccttataaagatgacaactttaaatatgcagctgaatacctttatcatttcaataactcacagaacccaggatttaaacaacttacaggcgataaagccgttgagtggggtataaaccaagctcgatggaattcagctaacctaaccagtatgacaaagcaggttggtcatatcttaacatctcgtgatcgtatggcagctaatgcatggcatacgttaatgaacggctataataaatcgcctaccacattttctggcgctgtcagcttcgccggcgaaatgctagccgaccca…	MADLELIPQPHDQYTVSPSGGTNSSGQQDAETDYDPYKDDNFKYAAEYLYHFNNSQNPGFKQLTGDKAVEWGINQARWNSANLTSMTKQVGHILTSRDRMAANAWHTLMNGYNKSPTTFSGAVSFAGEMLADPIGLAAGFAGGGVVAKAASTIFSKELSHLVMQHMAGQVTKPAVWAASQSGIESGYDDYAKQATDNVMLDAEGKKSSINKTELATATGVGTVFGAALGAVGGLVSKELGKAVGRWTDNIDDMVDSQEKKFSNAYLNDVKGIKNLFESIHNHDSNNTTDAEANNV
245	MAG14_112	MAG14_112_245	1733	0	0	0	0	0	0	0	0	0	0	0	0	0	0	0	0	hypothetical protein	atggcatatagcgacacacaacgcgttggttttatgccgtcatcggttggcggtggtatcgatcttagaccgttacaacaagttgccgatgaggcgttacgctttggtgctagggttaatttgcgcaaccaagaacagcaacaaaagatagatgcagctaacactgagcgccaagcggccgaagattttttatccggtaagaaaaacgatatcaagcagataaaaactgcccatgaccttgtttatagcaacgcctataacaagttccaactgacttcgatcaatacccaatcgcaaaataccttatcggcgctggcggctgacaatcagcaaaaccctaaatcgtttatgaacggtgcgcaagcttataaaaaagctgtgttggatgatgattcatta…	MAYSDTQRVGFMPSSVGGGIDLRPLQQVADEALRFGARVNLRNQEQQQKIDAANTERQAAEDFLSGKKNDIKQIKTAHDLVYSNAYNKFQLTSINTQSQNTLSALAADNQQNPKSFMNGAQAYKKAVLDDDSLAPEVKIAASHMMDSAIGSFYSRIEGVHQASVSAEAAKHGAIYTQDTLSRATDYMRSGDMGNAILQYDSGLRNITTGNWFSTPEAKQAAIDDYKKAGAVNLISQMAINAGKGEDGSDYNVADGLKFINAFKSGNLPKNQAVAVNNLLKGTGLTRNQLGDIMKTGVMKQYQTSQAIASYDHVQQIQKNNEIYNSIFPKLMTGEMSQSAAIAQAQAQGGDANLMVKIATFAPKAYSALHDDTASKLKLDTAVVNGTLTADMISHTQGLS…
246	MAG14_112	MAG14_112_246	413	0	0	0	0	0	0	0	0	0	0	0	0	0	0	0	0	hypothetical protein	atgaatcctttatcagcgatgttattcttatcgggctttatgaaagtgtttaccgctgaagaacaaaatagagccgtacagaggcagcttgatgagcaagccgaccaagtggaacaagcggctaaaaaccaaaagctagctaggttaacggcacttaataaaagcctaggccatgagatacaacaggcaggtatgggcgcaggacttcaaggttcacagcatcaagtagcccaaaatgacatcgatgcttacaactacgatgctacccaaatcgaaggtaacgccgctagccgcgaacgctctatagcttatcagcgtaaagttacacgattcaacactcgcgtttctgagctgggcggtttggtcgatagcggtttagcatattatgaaccatctgca…	MNPLSAMLFLSGFMKVFTAEEQNRAVQRQLDEQADQVEQAAKNQKLARLTALNKSLGHEIQQAGMGAGLQGSQHQVAQNDIDAYNYDATQIEGNAASRERSIAYQRKVTRFNTRVSELGGLVDSGLAYYEPSALGRL
247	MAG14_112	MAG14_112_247	1898	0	0	0	0	0	0	0	0	0	0	0	0	0	0	0	0	hypothetical protein	agaaatgaaacaggcagctattatgaaggtgcattggctttagataatgttttatctttggctcaaggtggtgtgcaaagacgacctggtctacggtatatcgacactgtggccgaagatgggttacttatcccttactcattcaataaaaatcaacgctattctattttcattggtttgatagatatcctcatttaccgcttgggcactgatggtatttactcaaggattcaaacgctagccagcccttacacttcattagaagatgttaaacaaatcaagtcctctttttccggtgatgtggtgctgctggttcatccggactatccacctaagcgtttatttcgtggggcatccgacaactggtctatctctaatcaaacgtttgatgttgtccca…	RNETGSYYEGALALDNVLSLAQGGVQRRPGLRYIDTVAEDGLLIPYSFNKNQRYSIFIGLIDILIYRLGTDGIYSRIQTLASPYTSLEDVKQIKSSFSGDVVLLVHPDYPPKRLFRGASDNWSISNQTFDVVPKWNFDDADSPAGSDCIIYFTDSGLTVNSQLTVGLNGFFTDPFTNTENNLIQAVSQLPNIHTGPDNISVVSNPTERVLTLKGKNQDEYIVTTYVTSGPGTYTYTINTQGSSKKEPVWSATRGYPAAVAFFAGRLWLGGMRSVPATLYGSRSLDYFNFDEGTALDHQAIGVGVSSNQINPILHIVGGRNLQVLTEGGEYGLTNDSLTPTKANLFEQTNNGSSACRPASVQGQTFFVRADGKSLIGFVYQRSQQSYVSYNSSILNPSII…
248	MAG14_113	MAG14_113_248	527	8	16	27	12	9	7	56	90	24	0	0	0	2	2	4	257	hypothetical protein	atgattagtgagcaaaagcagataaggactctgctagaagaacgcatcaggcagtttaaagcatggtctgatagcaaaccaaaagcagatgggcagctaactgtccgaaaatacccttgtaaagctgagttgcttgagtttcgattatctaaagagcaacaaccaatggcccaggccaaaataaaaattacattctccaatcaacgccaactgtgggctgcggcaatgcagctttctatttttactcgtaccgtgcgcaagccaggctatgaagacttaaagcctggcatttatttccacaccgaccccgggagcggaaaaaagccagaacttatcaagtcctataaaattattatcaatgcgaatggcgcctacgaaccagcagactttaatgaatgg…	MISEQKQIRTLLEERIRQFKAWSDSKPKADGQLTVRKYPCKAELLEFRLSKEQQPMAQAKIKITFSNQRQLWAAAMQLSIFTRTVRKPGYEDLKPGIYFHTDPGSGKKPELIKSYKIIINANGAYEPADFNEWYRYWLQRMLKDSAVKTLFAHKELVSDNEIEAEQYLKEALKQE
249	MAG14_113	MAG14_113_249	1049	22	33	61	65	78	258	237	528	138	0	0	2	10	54	0	1487	Thrombospondin type 3 repeat:OmpA/MotB	atgaagcgttattctttttctcatgggcttatctgtgccgcaattgctgcggtggtaagcaccagcgctatggcgaattcagtagtagagaaaggttttactttttctctaggtggtgcttataactggcttgatagctctcgccaacttgataacggcttggcgccagagcttggcattggctaccgatttgataatcgctggagcatagagggtgtttactcgcaatacagaacagacagtaacagcaaaggcaaagctaaacttaaagactacagggttgatgccttttatgatttgcgaccatgggacggaagctggacgccttatactgtcgccagtgctggccatttcacagaagattttgataatttcagcaataatgatgatacgcgtttg…	MKRYSFSHGLICAAIAAVVSTSAMANSVVEKGFTFSLGGAYNWLDSSRQLDNGLAPELGIGYRFDNRWSIEGVYSQYRTDSNSKGKAKLKDYRVDAFYDLRPWDGSWTPYTVASAGHFTEDFDNFSNNDDTRLGLGVGVRKALMPNLSLRADIRAIRSLNNNNTESMANVALTWTFGSSSQPSQPAIVEDQYQQPDQQAAVAPVAVDSDKDGIADSQDLCPNSPAGSKVDSTGCIPKKSIDMRVQFGFDSDQISSAELNHVAKISEFLKRYPDVRIRVVGYTDNEGTAEYNQNLAQRRAEKVRDLLISQYGVKADRIEAVGKGESDPIADNTTPEGRQKNRRVIAEMLH
250	MAG14_113	MAG14_113_250	1046	4	5	23	4	9	3	20	33	8	0	0	0	0	6	0	115	hypothetical protein	atgcatcattataaacgagagatactgccatcacctacagaagccgttacagcaggcgtttgcaattttggcacattcagcagcgaaataaaaaaaattaatttacttgaaacaaggcgcccactaggattacctctgcctaccaagctaaataatttccgcttaaaagaatgggaggcgattcaactactttgtgaacattggtttttctgtatagctgtatacaatactaaaacaataggcaccgcaattattatggcgtttaatcgccagacagagcgcatgtatgtttaccaacacaaagtgcccttctggaaattaacgactcctagcggtctcactgatagtcactattattatcatagtcctcacttgacgcttgatatcaaaaaccagctc…	MHHYKREILPSPTEAVTAGVCNFGTFSSEIKKINLLETRRPLGLPLPTKLNNFRLKEWEAIQLLCEHWFFCIAVYNTKTIGTAIIMAFNRQTERMYVYQHKVPFWKLTTPSGLTDSHYYYHSPHLTLDIKNQLQTHKVTVSFSANHFKNQPNLQGTFCGHYLTEPIVTISPLGDNRPLYSHKALMTAEGYVYINNKKFNYASEHTCMIMDDHKGFYPYTMQYDWATALGRGSEGILQGFNLTNNQVKDQEQFNENCLWFDGKMYPLPPISIVRPQGVQGKWQIKDSYKLIDLTFTPRADVLNYLNLGLIKTRYHGPTGLFSGFIKTVDGPTVCFDGFVGMGEKKYIRM
251	MAG14_113	MAG14_113_251	1775	4	3	17	6	8	23	9	24	8	0	0	0	0	4	0	106	Outer membrane component of TAM transport system	atgattattagctcacagggcataaaaggaaaaaaccatatagcgcagaccatagctatgataattagcctatttctaacgatggttcctattaactctcaagccatgccattaacgtgggaagtagaaggtattaaaggtgagttaaagaaaaatgctctcctttaccttaaagcattacccgctatagaacccaaacaatttaacagtcataagtcacgaattattcaagccgttaaccaagctctacaggctttgggctactaccaaccagatataacggttcagctatcagcagcagataaccgtaaggtgttaatccaaattaaccctagagaacctgtgatcataaagcgccttcatatcatgttactgggtgatgctgcaaaagattcagca…	MIISSQGIKGKNHIAQTIAMIISLFLTMVPINSQAMPLTWEVEGIKGELKKNALLYLKALPAIEPKQFNSHKSRIIQAVNQALQALGYYQPDITVQLSAADNRKVLIQINPREPVIIKRLHIMLLGDAAKDSAFTNLLQHSPLQEGFQLNDGQYESLKSELSGLGAARGYFDAKISKHRIDVYPEKKIAIIYLTFDSGKRYTFGQINYGKMAPAIQKLLSTMVDIKSGTPYSAASIGKLTQSILSTGYFSQVNIYPQRQHIDDYKVPIYISVTPKLAHEFEVGAGFSTDEGPRFSASWKKPWANEHGNSLTNEVKISRTTNELTSSYKIPDGNPLQEYYNLQLGYQKKNLEDTYSHLLTTSIHRWHKRSLTRKGSWDHDLFFRIDYESYTQGNQSDNSL…
252	MAG14_113	MAG14_113_252	3662	7	7	26	4	8	9	2	42	22	0	0	0	0	2	0	129	hypothetical protein	atgaagtggctgactagaagcttgatgtcattgtgcatttttctttccttagtgcttttattgctatttactcatactggcagcctgctgatttggcatcaaatacagcattggattccacaactaaaaggagagctagttgaaggttgcattggaagacgatttgctatcgaaaaatttacttggagtaatcctgcaattactgccaaagctgatcgtatatctgtcaactggcaattatctagctttttgaaacagcgtgtaaaaataactcagtttgatattttaaatccatcgattcaactagttactgtacctaacgaaaaaaatagagcccaagataaagccaatgcaaaagatgcattcacatctccttttcctattgatatccataaaatt…	MKWLTRSLMSLCIFLSLVLLLLFTHTGSLLIWHQIQHWIPQLKGELVEGCIGRRFAIEKFTWSNPAITAKADRISVNWQLSSFLKQRVKITQFDILNPSIQLVTVPNEKNRAQDKANAKDAFTSPFPIDIHKININHFNLYNNGLHVSFSHIDTGLTFNNNVMTIKDGVIKQLTIDTAEKQSQNVKHSIKTTIALPAIDLPFNIKAANLQFIDSRFEKEQIPHITVAFTSSKHEITLQTLAIQHPITDLKLSGSMRLTGSYPVDLTLDATLHKALSANLLENQTIHGSLTGNLNQLNVRLNINGTNNAFLTGTIAPLKDQLPFNLTLDWQKLQWLLTGKMPAIHIHNGCATAIGNLSQYTFQLNTHLSASKQPPIYLSIDGTGNRHRLFLDSAKLKTNE…
253	MAG14_113	MAG14_113_253	1172	2	4	29	6	15	24	16	27	8	2	0	0	2	1	0	137	hypothetical protein	atgccagtatctaatggcaggcaagctaatgtcactcgattggtaatagtggttgttgggcctatgggctggggtaaaaccacattaggagaggcacttgttaaacggtatcccgatgaaataagccatattgatggcgatagcttggctccatcaatgagtttgcctaaagtgttacaactaaaggagcaaagaaaccaagtcacttggagttgtatagccagcgttatagctaaaggaaaaataccggtgatctcaacgggaggaggtgctctgtgctgcgagcctaaacaaaccaaaagaagaggtgcagatgggcagggtgatgagcagaataggatcgcattgttaacctttttatcatcattaggtattaatgccacgatcttgctgtttgtg…	MPVSNGRQANVTRLVIVVVGPMGWGKTTLGEALVKRYPDEISHIDGDSLAPSMSLPKVLQLKEQRNQVTWSCIASVIAKGKIPVISTGGGALCCEPKQTKRRGADGQGDEQNRIALLTFLSSLGINATILLFVPGRCFEEGADEQYIAQQYADETALDAEFERRQARGTLLAVDKNKLKHAMMANNQFAHRLMAYCRRSKAGMICSYPRLLPQSNHILPVIKELDSAIKQYKRTLSVLTSLFVQRIELICQVQGWPKRFYHQTFAVNNDNNKKIAIPETYPKISYTAPFVKAFDVVTKEPLGEFVCIPGSVYTDHSVEGRSPHITIKLFKYRAKEMGILAKYYWQVLENKVQENPVVSLLNYQGEQVKKSVAFETAPSVRVTPYVLNYHT
254	MAG14_113	MAG14_113_254	479	2	2	8	4	6	17	6	28	10	0	0	0	0	2	0	117	tmRNA-binding protein SmpB	atggcaaagagttctaaaaaaagtaagaagggcgattcatctatcgtcatcaataaaaaagcgagacacgattatcacattgaccagccttttgaggccggcatttcccttgctggctgggaggtcaagagcttaaggcaaggtaaggtgcagctggttgacagctatgttttgcttaaagatggtgaagcttggttaattggtgcacaaatcacgcccttagaaactgcatcaacgcacgttattgcagaccctcgacgcgatcgtaaattgctgctgcatagaaaagagttagctaagctattctctacaacccagcaagaaggtttcacctgtatagccacaaaactttactggaagaaacatttgattaaatgtcagattgctttagctcgcggt…	MAKSSKKSKKGDSSIVINKKARHDYHIDQPFEAGISLAGWEVKSLRQGKVQLVDSYVLLKDGEAWLIGAQITPLETASTHVIADPRRDRKLLLHRKELAKLFSTTQQEGFTCIATKLYWKKHLIKCQIALARGKKEFDKRAATKQREWNIEKQRIMRRG
255	MAG14_113	MAG14_113_255	131	0	0	0	0	0	0	0	0	0	0	0	0	0	0	0	0	hypothetical protein	atgagacagatctaccccagcgatatcagccgtaaacagtttgagcctattcttgaaagcaggggaggcaaaagcaagcgagcttcattatcgttgatgctcaaagcattcagagtactgcttatgcgctag	MRQIYPSDISRKQFEPILESRGGKSKRASLSLMLKAFRVLLMR
256	MAG14_113	MAG14_113_256	116	0	0	0	0	0	0	0	0	0	0	0	0	0	0	0	0	hypothetical protein	atggtgcaggcaaaaaggagtcaactacatgcttttgcagtgatcccaaaatggtatgttattgagctgtcctttgcttggataaaaagactccatcgtttatggaaaaataactaa	MVQAKRSQLHAFAVIPKWYVIELSFAWIKRLHRLWKNN
257	MAG14_113	MAG14_113_257	164	0	2	2	0	4	3	2	4	0	2	0	0	0	0	0	20	hypothetical protein	gtgtgggatctgacgaaaccgaaagggcagcaatgcgtagcaacgctgggacttgatatcacatggagggagcaagcacaacgtgctgctgagttattgagacaagacctggaaaagatgggtctgaatgaaccggacggagaacttttatcccccactgagtag	MWDLTKPKGQQCVATLGLDITWREQAQRAAELLRQDLEKMGLNEPDGELLSPTE
258	MAG14_113	MAG14_113_258	74	0	0	0	0	0	0	0	0	0	0	0	0	0	0	0	0	hypothetical protein	atgagacaacagtaccccagcgatatcactcgtgagcagtttgaacctattcttccgatccttgaaagtgctcgc	MRQQYPSDITREQFEPILPILESAR
259	MAG14_114	MAG14_114_259	1091	2	6	11	0	4	4	4	6	0	2	0	0	0	2	0	41	Epoxyqueuosine reductase (EC 1.17.99.6) QueG	ttgtccgcagagctatcagcatcagacttactttcacttgcgcagcaaattaaaacatgggctagagagtttggctttcagggggtgggtatcactcacccggtgatccctgaaaaagacaagcagcattttttagcatggcttgatcaaggctttcatggcgaacttaactatcttgaacagaatcaagatctgcgctttcatcctgaacgacttcatccgggaaccatccgaataatctcggtgcgaatggactatatgccaggagatacacagacaataaaaatactcagccataaggaaaaagcatatatttctcgctatgctttagggcgtgattaccataaagtcatccgtaaacgcctcacacagttaggtaaaaaaatagaacaaacctat…	MSAELSASDLLSLAQQIKTWAREFGFQGVGITHPVIPEKDKQHFLAWLDQGFHGELNYLEQNQDLRFHPERLHPGTIRIISVRMDYMPGDTQTIKILSHKEKAYISRYALGRDYHKVIRKRLTQLGKKIEQTYGEHGFRAFVDSAPVMERPLAQQAGLGWMGKHSLVINPKAGSFFFLGELFTNIPLPADKPFTKTHCGSCQSCIVHCPTQAIVAPYKIDARRCISYLTIENKGSIPEALRPLMGNRVFGCDDCQLACPWNKFSKPTVESDFQPRHHLDQSDLATLFVWTEAQFLERTAGSAIRRAGFESWLRNLAVGLGNAPSSKTVIAALNARKDYPSKLVREHVNWAISQHADFLATSHL
260	MAG14_114	MAG14_114_260	119	0	0	0	0	0	0	0	1	0	0	0	0	0	0	0	1	hypothetical protein	atgagcataagcagccaaactccagaacaaggcgaaataatgcataatagcagtgctggtgttcggatgctcagcccaataacgcagctaaaaaatttgattagtattaggtttgtttaa	MSISSQTPEQGEIMHNSSAGVRMLSPITQLKNLISIRFV
261	MAG14_114	MAG14_114_261	365	0	0	5	4	2	3	0	12	0	0	0	0	1	2	0	29	Exodeoxyribonuclease VII small subunit (EC 3.1.11.6)	ttgtttaaaaacgctgctctcaaaaaaccatcaattgccactaaagaaaaaaacgccaagcatgtcacctgtgttatccttgcgcttattttgggttgcttctttacaggtttttatatggccaacaaaaaaaatgctgccgcctttgaacattcgttgaatgcgttggaatcgctggttcagcaaatggaatcgggtgatctttcccttgaagactcactaaaagcatttgagaaaggggtaaaacttgcgcgtgaatgccaagaagctctttctagtgcagaacaaaaagttcatacattaatggaaaagaatggtaaaatcgactcccagccttttgctcagctggatgaggaaaagcagtaa	MFKNAALKKPSIATKEKNAKHVTCVILALILGCFFTGFYMANKKNAAAFEHSLNALESLVQQMESGDLSLEDSLKAFEKGVKLARECQEALSSAEQKVHTLMEKNGKIDSQPFAQLDEEKQ
262	MAG14_114	MAG14_114_262	899	94	41	199	34	20	101	45	110	51	0	0	2	4	36	2	744	(2E,6E)-farnesyl diphosphate synthase (EC 2.5.1.10)	atgtctttggatgatttcatgggacagtgctgtcagcgagtagatagcgcactgtataacgtacttcctaataacaacgacctcagcaaaacacttattaaggcaatgaactactgtgtttttaatggaggcaaacgtattcggccgctattaacttatgccgcttgtcagagtgttgggggacatttcaatgatgccgatccggctgcttgttctgttgagctggttcatgcctattcgctcgttcacgatgacttacctgcattggataatgataattggcgccgcggaaagccaacttgccataaagcatacgacgaagcaacagcaatacttgttggtgacgctttgcagtcaatggcttttgaagtgctaagccataaccatttacttcctcat…	MSLDDFMGQCCQRVDSALYNVLPNNNDLSKTLIKAMNYCVFNGGKRIRPLLTYAACQSVGGHFNDADPAACSVELVHAYSLVHDDLPALDNDNWRRGKPTCHKAYDEATAILVGDALQSMAFEVLSHNHLLPHAKLSDTQRLLQMQSLSAAIGHAGMVGGQAMDLRSVGLALTQEQLIQMHSHKTGALIKSCVKMGALCNPEVTHYQLEQLDKYATSIGLSFQVQDDILDVTSETEILGKAQGADEALAKPTSVSVLGLEQAQVLASNCCQSALSAITNFGSAAEPLRQLAGYVIKRAY
263	MAG14_114	MAG14_114_263	1928	59	55	140	39	36	135	55	190	55	4	0	0	8	26	0	802	1-deoxy-D-xylulose 5-phosphate synthase (EC 2.2.1.7)	atgttgcatgaaatacctaaaaaaaggccagctacgccactgttagatcaagtggaaaacccagatcaacttcgtgccttgagtgcagctcaattgccccagctggccgatgaacttagagcattcttggtctattctgtgggtcaaaccggcggccattttggtgccggtttaggtgttattgaactgactatagcgcttcactacatttataacacaccagaagatcggctcgtgtgggatgtaggccatcaaacttatccacataaaatacttaccaaccgcaaaaacctcatgccaactctacggaaaaaaaatgggttggctgcttttccaaaacgaatagaaagcccttatgacacctttggtgttggccactctagcacatctattagtgcc…	MLHEIPKKRPATPLLDQVENPDQLRALSAAQLPQLADELRAFLVYSVGQTGGHFGAGLGVIELTIALHYIYNTPEDRLVWDVGHQTYPHKILTNRKNLMPTLRKKNGLAAFPKRIESPYDTFGVGHSSTSISAALGMAVSAKLKNETRQSVAIIGDGAMTAGLAYEALNHAADLKANMLVILNDNDMSISRNVGGLSNYLAKVLSSKTYQYIREGSKKALHSIPAAWELARRTEEHVKGMVIPGTLFEEMGFNYIGPIDGHNLPMLIQTLDKMKALEGPQFLHVVTQKGKGFSLAEADPIGYHAITKLEPQTKDNTSKQPKKPKYCNVFGQWLYDMAVDDERLVGITPAMCGGSDLIKFSECFPERYFDVAIAEQHSVTLAAGMACEGMKPVVAIYSTF…
264	MAG14_114	MAG14_114_264	173	0	0	3	0	0	0	1	3	0	0	0	0	0	0	0	7	hypothetical protein	atgctgattaccgtagttagaaaatacgattggtatcattgcggctgttattttttgtgtttctgccttgctggcaaacaatcatcacttactcattcgctattttttaaaatacctctattatatgctttaaatcttgtggataacctacagccaagaaaagtattgtattaa	MLITVVRKYDWYHCGCYFLCFCLAGKQSSLTHSLFFKIPLLYALNLVDNLQPRKVLY
265	MAG14_114	MAG14_114_265	221	0	0	0	0	0	0	0	0	0	0	0	0	0	0	0	0	Dihydroorotase (EC 3.5.2.3)	atgaataataaacttatccttacccgtcctgatgactggcatatccatcttcgtgatggccagtacattgnnnnnnnnnnnnnnnnnnnnnnnnnnnnnnnnnnnnnnnnnnnnnnnnnnnnnnnnnnnnnnnnnnnnnnnnnnnnnnnnnnnnnnnnnnnnnnnnnnnnatatgctttaaatcttgtggataacctacagccaagaaaagtattgtattaa	MNNKLILTRPDDWHIHLRDGQYIXXXXXXXXXXXXXXXXXXXXXXXXXXXXXXXXXXYALNLVDNLQPRKVLY
266	MAG14_114	MAG14_114_266	1040	6	7	25	7	16	15	21	82	22	0	0	0	2	8	0	211	Dihydroorotase (EC 3.5.2.3)	atgaataataaacttatccttacccgtcctgatgactggcatatccatcttcgtgatggccagtacattgaagaaaccgttcgctcagcctctcgtttatttggcagggttatcgttatgccaaatcttaatcctcctgtcatcaacgcaaatgatgctgcagcctataaagcgcgtattgttgataatattccggcaggccgagattttcagccgctaatgacactttacctaaccgataaaaccgtacctgaatggatatatgaagcaaaaaaacgcggcgatgtggtggctttaaaactctatccagcaggtgcaacaacgaattctgattcaggcgttaccgatctgcccgctatttaccccacattagaagccatggaagcatgcaatcttcct…	MNNKLILTRPDDWHIHLRDGQYIEETVRSASRLFGRVIVMPNLNPPVINANDAAAYKARIVDNIPAGRDFQPLMTLYLTDKTVPEWIYEAKKRGDVVALKLYPAGATTNSDSGVTDLPAIYPTLEAMEACNLPLLVHGEVTDTKVDIFDREKIFIDRYLIPLTKRFPTLKIVMEHITTADAVSFVRESGDNVAATITAHHLLYNRNHLLVGGIKPHYYCLPILKRSTHQQALLDAATSGNPSFFLGTDSAPHVRGAKESSCGCAGCYTAPAALEMYAEAFEMMGSLDKLEGFASHFGPDFYGLPRNKDTVTLVKEPWQMPNSIPFGNDTVIPLKAGEPILWQLLTH
267	MAG14_114	MAG14_114_267	623	2	4	6	0	6	26	19	22	9	0	0	0	2	6	0	102	Ribonuclease T	gtgaaaactgacaataactacacaatgacagaccgtttcagaagcttcctgcctgttgtagtcgacgtggaaaccggtggtttcaatgcgaaaacagatgctctgttggagattgctgttattcccactgaaatggataacagcggttatctccatttaggagaattaattacctttcacgttaaaccctttgaaggcgccaatattgaaccttctgccattgaatttatcggtgttgacccattccacccacttcgcattgcctacgatgaacaggaagtaataagcaaaatttttcgcagtgtcagaaaatcagtaaaaagtcaggggtgcagcagagctattctggtcggccataacgcttcttttgatttagggtttgtgctggctgccgcagaa…	MKTDNNYTMTDRFRSFLPVVVDVETGGFNAKTDALLEIAVIPTEMDNSGYLHLGELITFHVKPFEGANIEPSAIEFIGVDPFHPLRIAYDEQEVISKIFRSVRKSVKSQGCSRAILVGHNASFDLGFVLAAAERCDIKRNPFHPFSCFDTATLAGLAYGQTVLAKACEASGIHFDGSEAHSAKYDTKKTAELFCNIVNRWKDLGGWV
268	MAG14_114	MAG14_114_268	668	2	4	22	10	4	8	5	31	3	0	0	0	0	2	0	91	COG0398: uncharacterized membrane protein / PF00070 family, FAD-dependent NAD(P)-disulphide oxidoreductase	atggcaattcgaaaacttttacttttgacgacagtcgtagtagctatcattgtattctattggctaggtggggccgagtatcttaagccagactttttcaaatcactatatagcgaaaatccaaagttaacagcaattgtattttttagtatctaccttactgttaccagccttgctttacctggagccgctatcctaacaatgatctgcggctatatttttggctttttacccgggctaattatggtgtctttcgctagcacgttaggcgcaaccgtatcttttttattggcaagaacgttatttcgtgactatgttcagcgtcgctttgcatctcatatgaatacattaagaaaagaaatagaaaaagatggagccttttatctttttactctaaga…	MAIRKLLLLTTVVVAIIVFYWLGGAEYLKPDFFKSLYSENPKLTAIVFFSIYLTVTSLALPGAAILTMICGYIFGFLPGLIMVSFASTLGATVSFLLARTLFRDYVQRRFASHMNTLRKEIEKDGAFYLFTLRLIPAVPFFVINLVMGLMPISTWTFYWVSQIGMLAGTAVFVNAGVQVGAIEQLSVSGVLTPELISSLILLGIMPLVARKGIEIWKHKRSN
269	MAG14_114	MAG14_114_269	164	2	0	2	3	0	2	3	8	4	0	0	0	0	2	0	26	hypothetical protein	gtgcagctcaacagcatagttaaaaaattcgataggtatgatttagcagtattaggcaccgaacagcgcttgctccacaaaaaaagcaacagtttattttttggactcttttggatagtggttataggtttaatttttattcattataacaccataacaccttaa	MQLNSIVKKFDRYDLAVLGTEQRLLHKKSNSLFFGLFWIVVIGLIFIHYNTITP
270	MAG14_114	MAG14_114_270	1505	22	18	59	22	14	67	34	74	32	2	0	0	2	8	0	354	Glycerol kinase (EC 2.7.1.30)	gtggccactgacgttcaatatattgttgctttagatcagggcactaccagctctcgcgccattatctttaataagcaaggtgtcgttattgggattgcccagcgagagtttacccaaatttaccccaaagcaggttgggtagagcataatgccatggagatttgggcaactcaaagtgctgcgttaacagaagtgctggctaaaacaggtattaatagtgagcaggttgccgctatcggtattactaaccagcgtgaaaccactgttgtttggaataagcacacaggccgacctgtttacaatgcaattgtttggcagtgtcgtcgaacagctgctatttgcgaacagttaaaggccaaaggtctagaagattatatcaaaaaaacaaccggcttagtg…	MATDVQYIVALDQGTTSSRAIIFNKQGVVIGIAQREFTQIYPKAGWVEHNAMEIWATQSAALTEVLAKTGINSEQVAAIGITNQRETTVVWNKHTGRPVYNAIVWQCRRTAAICEQLKAKGLEDYIKKTTGLVVDAYFSGTKLKWILDNVEGVRDQAEQGDLLFGTIDTWLTWKFTNGRVHVTDYSNASRTLLFDITRLKWDEKMLKILNIPPAMLPQVKSSSEIYGQASIGSELGASIPIAGIAGDQQAALFGQMCFEKGMAKNTYGTGCFLLMHTGDQPIQSKHGLLTTIAWGIDNKITYALEGSVFMAGAAVQWLRDQLGLVQDAADTDYYASKVEDTNGVYVVPAFVGLGAPYWDPYARGSIFGLTRGANRNHIIRATLEAIAYQSRDLLDVMQR…
271	MAG14_114	MAG14_114_271	1175	31	15	39	3	8	28	34	44	20	0	0	0	0	4	0	226	N-acetylglucosamine-6-phosphate deacetylase (EC 3.5.1.25)	atgaatagttttttcttaaaagttggcgagatttttactgagcaaggtattattcatgatgctttcttgcaagtatctaatggaagaatagccagcattaataccccgcctgttaacgacacgaaaataattgatctgggtgagcgtaaacttgtacctggttttattgacctacatatacatggcagtggcggttgtgatgtcatggatgccagttatgcttcaatgaataccatatctcaaactattgcaaccaatggtgttaccggttttcttggcacaacagtgacgtctacttgggaagtaacacttgcagcgcttaaaaatatcaactgttgttataacaaagggatgacaggcgctgagttgttgggtgggtatagcgaaggattatttttt…	MNSFFLKVGEIFTEQGIIHDAFLQVSNGRIASINTPPVNDTKIIDLGERKLVPGFIDLHIHGSGGCDVMDASYASMNTISQTIATNGVTGFLGTTVTSTWEVTLAALKNINCCYNKGMTGAELLGGYSEGLFFSERFKGAHAAEFFLLPTRERLDAMLEAAKGSLKLLAIAPEIDGAIDAINYLTRKGIKVMIGHTGATYEQANQAFEAGAVGGVHIFNQMLGLHHRQPGTAGAILHNHDIIAELIADGVHVSPIIMDLVYRLKGADKTALITDCISASGLNDGNYDLGLLTVTVKNGIARTHTGALAGSTLTLDKAVANMINLVHIAPLDAVHMASLTPATLLGINEQVGSIKIGKRANFAVLDKEYNAVMTWVDGNITYQNDCYTHRTF
272	MAG14_114	MAG14_114_272	917	12	4	45	2	20	46	25	34	13	0	0	0	0	4	0	207	Permease of the drug/metabolite transporter (DMT) superfamily	atgaaaaaagctgttcaggctgatataggtctggttttggttgcagtgatctgggggtcaggctacattgctacgcgctgggctttagatggccaattaacacctttttaccttctagctgcccgctttttaattgccttttttatattagcacttatttgtcataaaaagttactcaccatttcacggtctgcttatgctgccggttttatcatcgctctttttctatttatagcctttgccttacaaacccttgggctgttatatactaccgtaccgaagaatgcatttattacttcagtcaatgttgtcatcgttccttttctttattgggctatcagtaaaaaaagacctgatattttttcattcagcgcttgctttatcacacttgcaggtgtc…	MKKAVQADIGLVLVAVIWGSGYIATRWALDGQLTPFYLLAARFLIAFFILALICHKKLLTISRSAYAAGFIIALFLFIAFALQTLGLLYTTVPKNAFITSVNVVIVPFLYWAISKKRPDIFSFSACFITLAGVALLSLQSFSHINYGDLLTLGCAFMFACQIIATDYYTRHHDPVTLTLLQLGFAGLFSLIAALVLESPPVNIGPKTALATFYLGAFSTLICYLLQTICQKYTSSTKTAIILSTEALFGTFFAILLLDEALTLRIAAGAILIFIAVITAETKFSFLPIKLKKRKNVKAMMPSDSS
273	MAG14_114	MAG14_114_273	71	0	0	0	0	0	0	0	0	1	0	0	0	0	0	0	1	hypothetical protein	atgagacaacagtaccccagcgatatcactcgtgagcagtttgaacctattcttccgatccttgaaagtgct	MRQQYPSDITREQFEPILPILESA
274	MAG14_115	MAG14_115_274	659	6	4	14	2	6	12	11	36	3	0	0	0	2	2	0	99	MarC family integral membrane protein	atgaattttagtgacctttttactcaaattatcacggtattaatgggcttttttgccattatgaaccctattgctaatacctcagtatttttaggattaaccgcccgagatagtagtagtgtacgacgacgaatagctaaaaaatcgttaatgctcagtttttgtattattactgcttttaccttaggggggcagtatatttttaccttatttggtataactctcacggcatttaggttggtgggtggaattttggtggcactagtgggctatcatatgttgcaaggaggagagcactcacccatacagaacccatcatctgaagatcaggctaaaagcatagcagcacagcttgaagtttctatctcaccattggctatgcccatcttggctggacct…	MNFSDLFTQIITVLMGFFAIMNPIANTSVFLGLTARDSSSVRRRIAKKSLMLSFCIITAFTLGGQYIFTLFGITLTAFRLVGGILVALVGYHMLQGGEHSPIQNPSSEDQAKSIAAQLEVSISPLAMPILAGPGTIATAMNFTSSGKPADLLVTLISFGLLCVITYIFFIYGNKFIHYIGDNGIKVVTRLMGLILAVIGMQMMIGGIVEVVSTINIGVH
275	MAG14_115	MAG14_115_275	2327	22	12	67	22	15	38	26	62	21	0	0	0	6	6	0	297	hypothetical protein	atgaatcataacaaagaagttgcaaagacggtagttggcaaaagccgccggatatcaccggtatggctattacccataattgcgttattgattgttggctggcttggctggcgctccataatagaacaaggtgttgaaatacatgtacagtttcatagtggtcagggtattcaagccggtaaaacaaacgtgatccataatgggttaatagtgggtcacgttaagcgtcttgttgcaacagaagatatgaaagcggttgatgcaaccatagttatggcatcggaatacaaaaaatacctagtacaggatacgcagttctggttagtaaagccacaaattaccatggccggtgtttcagggttagaaacgttggtatcgggtaattttattgcatttaag…	MNHNKEVAKTVVGKSRRISPVWLLPIIALLIVGWLGWRSIIEQGVEIHVQFHSGQGIQAGKTNVIHNGLIVGHVKRLVATEDMKAVDATIVMASEYKKYLVQDTQFWLVKPQITMAGVSGLETLVSGNFIAFKPSTKGKATEYFKALDTAPPIDDGGLSLTLRAKELSSLGIGSPVYFRRYKVGEVIGYSLAKNADYVDIRVYIESAFKSLVKKNTCFWNASGINISGNLTNIKIRTQSIVSIIHGGIAFYTPDSKTKEKPAENNDTFRLYENYTQAQAGIPITIKFPLGVTLVSANAPIFFHGFEVGRVESVNISDDLSSVIVKAVMRPETASSLVKGVQFWVEEPRIGLGGVSGLDTLIHGRYLNVDLSPLDQGNKKPTRLFNGYAKRPPASALVPG…
276	MAG14_115	MAG14_115_276	650	15	4	22	0	4	6	8	27	2	0	0	0	2	7	0	129	Paraquat-inducible protein A	ttgaatagtgggaagctattagggttaaagctgtgcttaggttgccagtgggtatgccagactaaggatgctcattgtccccgttgcggtagtaaggtgcatcaacgtattaaggcaagccttgctcggagttgggcgttgacaattacggcagctctgctttatatacctgctaatctattgcccatgatgacagttaatagttttggttccagtcagtcaagtaccattatgtctggcgtcatatcgctagcgaattacggtatgctgcctattgctttggtggtttttgttgccagtattttggtgccgttactgaaactattgggtttattctggttgctgctatcggttagttttcctagaccaaagctaaagtatcagatgcagctctatcgc…	MNSGKLLGLKLCLGCQWVCQTKDAHCPRCGSKVHQRIKASLARSWALTITAALLYIPANLLPMMTVNSFGSSQSSTIMSGVISLANYGMLPIALVVFVASILVPLLKLLGLFWLLLSVSFPRPKLKYQMQLYRLIVWVGRWSMLDIFVIAILVALVKFNRLGSVMAQPGIYAFSAVVVMTMLATLTFDPRLLWDASDLSTKAVCPEGTSRNIPHES
277	MAG14_115	MAG14_115_277	623	4	2	10	7	1	7	9	18	6	0	0	2	0	0	0	66	Paraquat-inducible protein A	atgtcctcagatatcacgatttcgacaagtcggatatggttatgccagaggtgtgatcttgtagtgactgccgttgatctctccggtagagataaggcatcgtgcccacgctgtgggcacgttatttccagaagtaagcctgatgctctaggtacattacttgccctcattataaccggtttggttttatatattccggctaatttctatcccgttctatctatggagctattggggtttcataatagcagcagcttatggagcagtgtggtatccatatgggagcaaggcttttatcctgtcgccatattggtttttttattagctatgtttatccctttattgcgtttgttatctctattagttttgtttttagcggttctttttgcaaaaaggggg…	MSSDITISTSRIWLCQRCDLVVTAVDLSGRDKASCPRCGHVISRSKPDALGTLLALIITGLVLYIPANFYPVLSMELLGFHNSSSLWSSVVSIWEQGFYPVAILVFLLAMFIPLLRLLSLLVLFLAVLFAKRGLLARAIMRTYCHLGEWGMVDIYLLGILISVVKLADMATVHMGVGLFCFACFTVIEITLSLNVNKAAIWEHIGLE
278	MAG14_115	MAG14_115_278	131	0	0	1	1	3	5	2	2	0	0	0	0	0	0	0	14	hypothetical protein	ttgcctatttttataccagttgaaataagaaaaggagagagttccctgttcatcactgtaaaacctgataggtcaaacctatcaaacataaacttcacagcacatctgcaaaaaggtattattgtagtataa	MPIFIPVEIRKGESSLFITVKPDRSNLSNINFTAHLQKGIIVV
279	MAG14_115	MAG14_115_279	473	2	10	17	6	10	9	28	48	22	6	0	0	0	10	0	168	hypothetical protein	atgacttcagaaaataacggtatgactcctcatactcagaaattatcagaagaaactgtaaaattgcttaaaaaactagcatcccgtccagaggtagaaatattgaactctgaggcgctacgggttgttcgctcagtctggcctgatgcctttcatgtctcatcgccgaagcctttgaaaataggtattcataaggatatggaggcaacaaaccttattccatctcacctgattcgtattgccttaaaattttttacaacgctagagcgataccttgagatgattaagccaggtgctattcgtgtagggttagatggtaaacctgctgggaaggtaaagctcagagaagcagtagatgcagaagtaaaattatttaatcaagaaaatgaagataataat…	MTSENNGMTPHTQKLSEETVKLLKKLASRPEVEILNSEALRVVRSVWPDAFHVSSPKPLKIGIHKDMEATNLIPSHLIRIALKFFTTLERYLEMIKPGAIRVGLDGKPAGKVKLREAVDAEVKLFNQENEDNNSTPPERHRIVVKQMRLLAVKKADQ
280	MAG14_115	MAG14_115_280	1067	12	12	42	4	18	49	30	65	24	0	0	0	8	4	0	268	Hyaluronidase	atggcgtttacatacggtgttattgaaggactttacgacgaagataagttatggtcttggcaaacacgtcatgaatatgttgatttttgcgctaacaaaggctttgatttttttatttatgcacctaaaaatgatgttttcttaagagagcgctggcgtgaaccatggccagaaactgagttcaatagtctaaaaaaactcagcagcgctttcaaagaaaaaggtattcgttttggtgtgggtttgaccccgtttgatgttaaaacactggattcacaaaccaaaaaagatataaaagctaaagtaaagctaataaatgatataaatccaaccatgctatctatattattcgacgacttcagtaatgatgtgactaacctagcggatacacagtcagcg…	MAFTYGVIEGLYDEDKLWSWQTRHEYVDFCANKGFDFFIYAPKNDVFLRERWREPWPETEFNSLKKLSSAFKEKGIRFGVGLTPFDVKTLDSQTKKDIKAKVKLINDINPTMLSILFDDFSNDVTNLADTQSAIAEFIAAESNAFDFQMVGTYYSSDPLLNRAYGLKPENYWSELGAMLDKRFDILWTGEHVISLGYDKTTLEYMSDLFQRQPFIWDNYPVNDPKWLKHRLRMYAFTGRPWQLSQWTSGHAVNPMIQPRLSKIPLCTLADIYQQKDKFIANSSFNNALRACCGEHLAKAIQDNLIYLTEEGANNFSPYSWKRLKTLFQSFKSTEQKPYADEILRWLDSVKETKDA
281	MAG14_115	MAG14_115_281	116	0	2	4	0	1	5	2	3	4	0	0	0	2	2	0	26	hypothetical protein	atgagcatcttgaattcacttgggtatataagcatttttttaccaccctatgaccatgccagaatcgacactaaggcaccagaaaaaaatatgcttaagccccaagataaaaactaa	MSILNSLGYISIFLPPYDHARIDTKAPEKNMLKPQDKN
282	MAG14_115	MAG14_115_282	1856	38	24	71	14	20	78	39	90	18	0	0	0	6	44	0	457	PTS system, 2-O-alpha-mannosyl-D-glycerate-specific IIA component (EC 2.7.1.195) / PTS system, 2-O-alpha-mannosyl-D-glycerate-specific IIB component (EC 2.7.1.195) / PTS system, 2-O-alpha-mannosyl-D-glycerate-specific IIC component	atgaatatcacacgacttacgcaacctgagttgatcgtccttgatcaagattttaatgattgtgatgatgttatctcttatcttaccagcttgttatattcagcaaacaaattaaaagatagagaagctttttttcaagcagtcatgaagcgtgagcaggacgggccaacagcacttggtgagcagcttgctgttccccatggtaaaagtgatgctgttaatcaggcttgttttgctattgctcgtcttaataaggcggttaattgggaaggcattgatggccctgagcctgttaatttggttgttatgctggctatccccttggcagagcagggtacgactcatattgagatactcaccgagctgaccagtaggttggctgatgatgatgttcgcaag…	MNITRLTQPELIVLDQDFNDCDDVISYLTSLLYSANKLKDREAFFQAVMKREQDGPTALGEQLAVPHGKSDAVNQACFAIARLNKAVNWEGIDGPEPVNLVVMLAIPLAEQGTTHIEILTELTSRLADDDVRKQLMEAETTTQFLAILNDAQLEDESVTTDDKKVIVAVTACPTGIAHTYMAAEYLEKAAKKAGITLFVEKQGAKGIETPITQSQLDKADAVILAADIALKNTDRFAHLPTLKIPVAAPIRDAAKVLQGALDLPSVSSKKQPTAITEDSQVGIKQALLTGVSHTIPFIAAGGIMLAAAIAFAPISKSGPDFSQHAILKLIADIGGAAFAIMLPVLAGYISYGKAGKPGLVAGFVGGYLAGTTGAGFLGAILAGLMAGFIVNEVKKLPVP…
283	MAG14_115	MAG14_115_283	143	0	0	2	0	0	0	0	1	0	0	0	0	0	0	0	3	hypothetical protein	atggttagctcttattgtaaagcagattattctagccctttgttgacctgtatcaggcttacatcagcctgctatgcttatgaaaaaagcaccacagtcgatcggctctttgtcgatcggctcttttgtggcggcggtaattaa	MVSSYCKADYSSPLLTCIRLTSACYAYEKSTTVDRLFVDRLFCGGGN
284	MAG14_115	MAG14_115_284	1109	2	5	12	2	12	44	12	36	10	0	0	0	0	8	0	144	Potassium efflux system KefA protein / Small-conductance mechanosensitive channel	atgtggtttagcaaatactgggaagtcataaacaatctgggccatagccatctgccgtggttaactcaatgcctgatcatcatcatagcagctagcattcttagcactattgcccgcaagtcactcgctcgacttgctcaaagcatcagtatcactgaaagcccatatattggctctatcatacaatccgcccgccttcctctgagcctttccgtctggctcatggctgtaggctggatactaaacctgacgcagtcaatgattgatctgcccattctagaggtcgtaccactgattcaacggctggtgattattattttactagcatggttcacccttaacttagtgaataatggctaccagaatttacaaaagaagcattttcaaaaaagcatcctt…	MWFSKYWEVINNLGHSHLPWLTQCLIIIIAASILSTIARKSLARLAQSISITESPYIGSIIQSARLPLSLSVWLMAVGWILNLTQSMIDLPILEVVPLIQRLVIIILLAWFTLNLVNNGYQNLQKKHFQKSILDANTAEIIYKLSQLFIIIAFSLMLLQSSGISISGLLAFGGVGGLAVGLAAKDMLANLFGGLVLYIDKPFHVGEKIKVMGSDVEGWVEEIGWRKTRVRNYDRQPIYVPNALFATSAVINPSRISNRPIRRIIGLRYQDLDKIKAITKAITLYLNSHKELDKHRPIEVRLINYGVSSLDIKIYCFAACMEYEDFLRIQEGILLQAGHIIMEHGAAIAFPTRTLDIDWPNELNNHKKSP
285	MAG14_115	MAG14_115_285	290	5	4	12	7	5	12	0	14	2	0	0	0	4	0	0	65	hypothetical protein	atgctggaatttatactcacacagcaacagaaatctgtcttggaatcccgctataaaatatcacgggatgctcgagagtttgaccgcatcaaagcggttctgctacgttctgaagacaggtcagtaaagaccatctctcaatcgcttagaaaaactgagcactctattgccctgcatattaatgactacctgaccaaggaaaagctcaagcctgagcgcggtggcagtgaaagtcatctgactgatgaacaaagcaaagcgctgattgagcatatttcagagcatacttaa	MLEFILTQQQKSVLESRYKISRDAREFDRIKAVLLRSEDRSVKTISQSLRKTEHSIALHINDYLTKEKLKPERGGSESHLTDEQSKALIEHISEHT
286	MAG14_116	MAG14_116_286	104	2	2	1	0	1	0	2	4	0	0	0	0	0	0	0	12	hypothetical protein	cgacagaaaattaataattttttacatgtaaccttgccagaaatcggaactttgttagcgagcaggattaatgataattttcaggtatttgatcctgcatcttga	RQKINNFLHVTLPEIGTLLASRINDNFQVFDPAS
287	MAG14_116	MAG14_116_287	560	2	4	12	6	2	0	12	18	6	0	0	0	0	1	0	63	LPS-assembly lipoprotein LptE	atggaatattgcctgcgcccggccacaagcctccttatactatttatcactggtttacttactgcctgcggttttcatctaagaggccagatggatatccatagtgatcttgctacattatcagtgactggtactgatatcagctatgttcgtcagttaactagagccctaaccaattcaggttttaaagtcatacccgacgctccttaccgattgaatgtgctgaatgtcagccaaaagactaacagccgcaaccaagcaacagagggctattatgaaattggtttggaaataaaggtaacatatcaattagccactgaagataatctcccactatttgcgccggtaacactaactgctgagcgcgatgtttctgagaataaaaaccttgttaatgct…	MEYCLRPATSLLILFITGLLTACGFHLRGQMDIHSDLATLSVTGTDISYVRQLTRALTNSGFKVIPDAPYRLNVLNVSQKTNSRNQATEGYYEIGLEIKVTYQLATEDNLPLFAPVTLTAERDVSENKNLVNASSSENSIVYQELRENLLSQITRKIAAIPNDQLQLEVAKSRKMAQQKQQHKESE
288	MAG14_116	MAG14_116_288	1043	0	4	14	2	4	3	6	18	6	0	0	0	0	8	0	65	DNA polymerase III delta subunit (EC 2.7.7.7)	atgaaaatcagacatgatcagctagccgctaatttaaagcgccaacttgctcccatttatattattagcggtgatgaaccgctgcaaattgctgaatgtgctgaccaagtgcgtaaaaaagctagaagcggtggttatagcgaacgcactatttatcatattgatcatagttttgactggcgagagtttttggaaaacattaactgcttgtccctgtttgcagaaaaaaaactcattgagttacacctagttaacaacaagctaaatgatgcgggaaaaaaggcactttttgaatacttaaaaactgcatcccaagataatctactgctgttgatagcaggtaaaatagaggcacaaactcaaaaaacaaaatggttcaaggcgcttgatcaagtaggg…	MKIRHDQLAANLKRQLAPIYIISGDEPLQIAECADQVRKKARSGGYSERTIYHIDHSFDWREFLENINCLSLFAEKKLIELHLVNNKLNDAGKKALFEYLKTASQDNLLLLIAGKIEAQTQKTKWFKALDQVGVFIPVWPITSKQLPDWISRRLKADGFEATPDALMLLAERVDGNLLAAAQEVEKLKLLASSYKLDIAAVRQAVSDSARYDVFDLSDAALEGNIKGCMRILGILRDEGVEAAVVLWALARDIRLLSHISHLIAKGKSLDTALSESAKVIGFSPYFLKQRKPLINKAIACHSPKTLRSLLLLAGKVDMDIKGTGKNNPWNRLQTLTLSLAGLSALKY
289	MAG14_116	MAG14_116_289	866	2	0	3	1	6	5	6	12	4	0	0	0	3	2	0	44	hypothetical protein	atgaaacaccactatttattgattggtataaccttattattaagtggctgcatcagcaaagctgtaaaatataatgagcaatggtctaaagctaaaaacctgaccaataccgcaggcatggctcagcagatgcaagatcaacaactgccaagcacggcttataataaaaacggtcaattgcttgactataaactaggcagcatatcccaccctgcctatggcaaatccagtggagtaaccggtataaatgttatgccctatggcgcctttgagacattttattggggctggagcgtgccaggtgcaagccatcggcataatcaccgtttgttcgcttggatgccagaaaataaagccgctgatattgaacaagcaagacagactatggagagcatggta…	MKHHYLLIGITLLLSGCISKAVKYNEQWSKAKNLTNTAGMAQQMQDQQLPSTAYNKNGQLLDYKLGSISHPAYGKSSGVTGINVMPYGAFETFYWGWSVPGASHRHNHRLFAWMPENKAADIEQARQTMESMVAKTATTILKEMQYKVQLIKKPYIHLGIPFKQWYIQGNDMQCTFKDMNCVLSIYIPEPVGPVITPAFAFYATAGQNAWLFHIADEYRYPRVAITQGDGLKSIPENVFYQKLSARLPGWAYLYLAPDEVGVGENNKTISYPYVLEKGKPLLFLRPVR
290	MAG14_116	MAG14_116_290	251	0	0	4	0	0	3	2	0	0	0	0	0	0	0	0	9	hypothetical protein	atgattgcacgtcccttcaagagtatttttttcaaatacagtcagactctgacgtttcatatttttttgagcgtagtggttaggtcaacattatatttatctattagcaatctcgcatggattaaagacttaccaaccttacttcacgctaaaatattttatgatgaagtgccaaccttttcacaaactgcaatgactgttgacctgcaattactgaaaaatgcagcaaagcctatgcttagatcattttaa	MIARPFKSIFFKYSQTLTFHIFLSVVVRSTLYLSISNLAWIKDLPTLLHAKIFYDEVPTFSQTAMTVDLQLLKNAAKPMLRSF
291	MAG14_116	MAG14_116_291	455	10	4	20	4	5	25	29	52	18	2	0	0	0	2	0	173	hypothetical protein	atgagcgttgtcattacagacactaaagataaaaaccgtggcgtattttccaaaaaagtttttatactcggcgatacggtcatcattggcaaaccaactgctgaactgactgaaagaacttggcaaagcttgcaagttggtattaacagacatgtccgtatggatcagccttttgagcttgtaaaccactcttgtaatcctaattgcggtttaaaattgaatcaatatggcggttataacctgatcgcgatgaaagatatagccatcaatgaagaaatcaccttcgattactgcatgagtgaatgggtttccattgccgttgaaaagtgtttatgcaatgatgaaaaatgcagaaaatctatcactggtggtaaagacttgaccgaaaagcagcgtatt…	MSVVITDTKDKNRGVFSKKVFILGDTVIIGKPTAELTERTWQSLQVGINRHVRMDQPFELVNHSCNPNCGLKLNQYGGYNLIAMKDIAINEEITFDYCMSEWVSIAVEKCLCNDEKCRKSITGGKDLTEKQRIEYAGFLAPFYDELIAQQE
292	MAG14_116	MAG14_116_292	134	4	0	2	5	2	3	10	19	9	0	0	0	0	0	0	54	hypothetical protein	atgcaaaaagcaaatataactaaagcattcaaagaaaaaatcctgaggctggctaaaaccataggtacccctagcatgacggcaaagcttaacagttggcgatccgctgctaaacataagatgccaaaaagctga	MQKANITKAFKEKILRLAKTIGTPSMTAKLNSWRSAAKHKMPKS
293	MAG14_116	MAG14_116_293	7451	24	12	52	24	44	60	51	137	40	2	0	0	2	16	1	469	hypothetical protein	atgcctgacggatcgaataacatacacggcgacagaactagctctgctagtggaaatatatcacctacagatagcaaggctaaaaaatcagggcgatatagtgataaacatgttaccccagttgaaggtgaacgacatgataatggtcatgagtatggggaaaaaacaggtatagaaactaaactgtatcaacgtaatatttcggttcatgaatcgcctattgagcactatcagaactgccagtttcagcttcaggttgctaatcaattgcttgattcagatgaagagtttagcgatgatctgggtatctactatttagatgaacagaacgttaagatttcggttgtaccacgagacgaaaattgcacagaagaaattttcagggcctatttagagtca…	MPDGSNNIHGDRTSSASGNISPTDSKAKKSGRYSDKHVTPVEGERHDNGHEYGEKTGIETKLYQRNISVHESPIEHYQNCQFQLQVANQLLDSDEEFSDDLGIYYLDEQNVKISVVPRDENCTEEIFRAYLESLKELEDHRESILKNCTNQLVQAKSILGSNESVLQEINLTDTQVRAVQFSHLLSMASIEEARLDEPETDSNDTVSTRNNTLSDMDDFYAIGSLVNNGASPSDVSTNPVVTPSSDSAQDSEEPLIKDENADQSARDGIDQQSSEKIESGGGSGISGLQDKQSSGKIEPSGGNDSPRSPDKESERLDLDADSVRKNDTKTTLEVAIPDNSDAALFNNNEVSKPRDKELKGAIGDNTNNSEEGKKNDNDPAQVTPSILNKNNIAPNFLVG…
294	MAG14_116	MAG14_116_294	785	0	4	8	0	0	3	6	26	2	0	0	0	0	2	0	51	Heme ABC transporter, ATPase component HmuV	atgttcaagaaaaaaaatacgcttgagcttcataatgttagtgttcacattcagaataatattttgctagatgctgtcaatctgaccattagacccggtgaagttgtttcgatactggggcctaatggcgcgggtaaaagtaccttaatgaaaacaatcacccatgagcaagcgctcagtactggtaatattatcttaaatggccggcatcattggcgtcgggaagataaagcgttaatgttggccgttttacctcagtcatcgtcgcttaattttccctttacagtagaagaaacagtactactgggcagaacgccttgcagcagtagtcgagcgcataaccgcttggttatgtgccaagcattaaagaaggttgattgctgggacttgcgggctcga…	MFKKKNTLELHNVSVHIQNNILLDAVNLTIRPGEVVSILGPNGAGKSTLMKTITHEQALSTGNIILNGRHHWRREDKALMLAVLPQSSSLNFPFTVEETVLLGRTPCSSSRAHNRLVMCQALKKVDCWDLRARLYTTLSAGEKQRVHLARVLSQLWDDSSLGSRYLLLDEPTSALDPAHQQQVLQIARAQADAGMGILIILHDLNLASRYSDRIVILNQGAIAVQGTPYEVLIPDNLLSIFSIEVHVLEHPSKSCPLIINV
295	MAG14_116	MAG14_116_295	1049	6	2	13	2	2	6	9	11	3	0	0	0	4	2	0	60	Hemin ABC transporter, permease protein	atgactcgtaggcattgcgccctcgttttactgacaacgcttgtcgctttggtgcctattatcttaatactttcactaggcacaggtcctgtgtcaattaggccggcagagattgcatctatcttacttcatgatagtggcttggtggatgcatcgcctgacgataagctgcgactgattattgaatcgatcagactgccaagaaccttggtgggttttatggtaggcggtgctctggcggtggcaggcgcagcgatgcaagggctgtttcgtaacccgctagctgatcccagtattattggggttgccagcggctcagctttgggtgcaagtgtttcaattgttttaggcgccataccgtttactatggtagcacatgggctactgcataatattgaa…	MTRRHCALVLLTTLVALVPIILILSLGTGPVSIRPAEIASILLHDSGLVDASPDDKLRLIIESIRLPRTLVGFMVGGALAVAGAAMQGLFRNPLADPSIIGVASGSALGASVSIVLGAIPFTMVAHGLLHNIEVPLMAFIGGITTTGLIYRIGTTGNGTSVTTMLLAGLAINALAGACIGFLSYIADDATLRSLTYWQMGSMDSATWDMVLICTVTLLPASLLLCRYAQVINVLLLGESEARHLGVNIQRVKFQLITLSALAVGVSVSVSGIISFVGLVVPHLIRLIVGPDHRILLPASTILGGLLLVCADMLSRTLIAPAELPIGIVTSLMGAPFFMVILWQQRQRIS
296	MAG14_116	MAG14_116_296	113	0	0	0	0	0	0	0	0	0	0	0	0	0	0	0	0	hypothetical protein	atgaataaaaatatgagtatgggtgctcatattctgattattttctaccgatttcacttttcaaataaatggcccttactcgataagccagcgttgattaactatgactcgtag	MNKNMSMGAHILIIFYRFHFSNKWPLLDKPALINYDS
297	MAG14_116	MAG14_116_297	428	2	2	12	0	4	4	8	10	6	0	0	0	0	2	0	50	Biopolymer transport protein ExbD1	atgattcgtttacgcagcctagaagaaaccaatgcatcactaccattgccagacctgacacctttgttagatgttgtgtttattgtgatgatatttttactttttacagcgaatgtgcaaacactgagcattccagtaaagttaccgcaagcaacacaggcagaagctatggtagctcagcagccaaaaactctgacggtcagtattctagcagagggcagtccttgggctatcagtaaaaagcgatttgatagttgggcagtttttagtcaaagtttgcttaaacaggttaaagataagccggatgtaacggtactgattgcaggagataaaacagctccactggggcatttggttaagttgatgatgtttcttgggcagcacaaaataaaggcggca…	MIRLRSLEETNASLPLPDLTPLLDVVFIVMIFLLFTANVQTLSIPVKLPQATQAEAMVAQQPKTLTVSILAEGSPWAISKKRFDSWAVFSQSLLKQVKDKPDVTVLIAGDKTAPLGHLVKLMMFLGQHKIKAAQVLMKDIPS
298	MAG14_116	MAG14_116_298	704	0	4	6	5	7	1	8	11	6	0	0	0	0	8	0	56	Ferric siderophore transport system, biopolymer transport protein ExbB	atgttaactgaacaattagcttctctgggggcaatggcatggccgctgattattttatcttgcttaggactggctatattgctcgaacgtttagccacctatgccatgctaccttcaataaaaaagaacagactgcagtcactctttgaagcggtacaaacatgtaggtgtaatgagagtcagcagcgtaacttatccaaagacctaagtagaagaaaaggcattcagcagggtattgctgttttgctcagtcatagcaataacaataaagcaatgcgagaagaaattgcagggttatggctgttaaaacagcagcaagctcttcagtgttggttaaagcctttaatgctcattggtattttgtcgcctatgtttggtttgctgggtaccgtattgggt…	MLTEQLASLGAMAWPLIILSCLGLAILLERLATYAMLPSIKKNRLQSLFEAVQTCRCNESQQRNLSKDLSRRKGIQQGIAVLLSHSNNNKAMREEIAGLWLLKQQQALQCWLKPLMLIGILSPMFGLLGTVLGLIHMFQGIAATAGPVTPDVLAGGLWEAMYTTAFGLFIAIPALAGAHGLGVWASHYVGQLEIALNHTNLLLEGMDIDSNGFIVKENPADKPPLKSKAEAILV
299	MAG14_116	MAG14_116_299	707	7	6	18	9	10	9	8	25	2	0	0	0	1	4	0	99	hypothetical protein	atgattggtattagtaacatgccgcgattatttttagccttgtttgtttctgtattgctccatttaagtgttattgcataccttagccgtcaggaaagaatgcctataacggttcatgatggcagtatccaagcaccggttagtttaacattttcaaccgttgctaatccggcatcaataacaaaacaacaaatgaagcctgcttctttgccgcagcctgaaaaggtgccaaagaaacaatctaataatctgctatccaaatcagagcctactcctgccaaggccatagaaaaaaatcagccaccaaagcaagctatgactaagcaggaagagcaaagaaagcgagtgagggataaaaatatatcgcaacagccggcgagtgttagagccgcgttaaag…	MIGISNMPRLFLALFVSVLLHLSVIAYLSRQERMPITVHDGSIQAPVSLTFSTVANPASITKQQMKPASLPQPEKVPKKQSNNLLSKSEPTPAKAIEKNQPPKQAMTKQEEQRKRVRDKNISQQPASVRAALKKSEVTGVSDEPVETSQADAIKKVSPIYPMRYQRRNIEGRVLLKLLVNEQGLVIRVDIKESSGFKQMDESAVEAAKQWIFKPKQVDGRQVKSWLNLPVKFQLS
300	MAG14_116	MAG14_116_300	113	0	2	7	1	9	6	5	2	3	0	0	0	0	0	0	35	hypothetical protein	atgctcattgcggtagttagaaaacacgatttgtataataccttttttagcataacaggacttaatcaatctcaacgcaatgtatatgacaacaaaataagctatcaacgttag	MLIAVVRKHDLYNTFFSITGLNQSQRNVYDNKISYQR
301	MAG14_116	MAG14_116_301	1085	3	0	21	14	4	22	12	22	2	0	0	0	0	2	0	102	A/G-specific adenine glycosylase (EC 3.2.2.-)	atgactcgcgaaaaacaattcagcacagttgtgcttaactggtttgatcaccatggtcgaaaaaacttgccatggcaacagaatatcaccccttatagcatttgggtcagtgaaattatgcttcaacagacccaagttactactgtcattccctattttgagcgttttattaaacgtatgcctaatgtacaagcactagctagcgccaaacttgatgatgtattgcacttatggagtggccttggctattacagtagagccagaaacttgcacaatgccgccattactattgtcgataaacacgaaggaaaatttcctgcctctgttgctgagcttagtgaattgcccggtattggccgttctactgctggtgctattgctgctattagcatgggcata…	MTREKQFSTVVLNWFDHHGRKNLPWQQNITPYSIWVSEIMLQQTQVTTVIPYFERFIKRMPNVQALASAKLDDVLHLWSGLGYYSRARNLHNAAITIVDKHEGKFPASVAELSELPGIGRSTAGAIAAISMGIKAPILDGNVRRVLARYHTITGWPGQASVQKKLWAIAEAATPSERTADYTQAMMDLGAMVCTRGKPNCVICPLTQDCLARIAGVQSMFPSPKPKRQLPEKHIHMLMVVNCFGEVLLEKRPSTGIWGGLWSFPELAPEAELEAEASIKTGLQLDSFEQWKSFRHTFSHYHLNITPVKAIATKAVDRIARSKAWYWYNTEAPTRLGLAAPVKKLITALSKSSTLKHEKHRE
302	MAG14_116	MAG14_116_302	1340	11	13	59	6	14	28	14	55	10	2	0	0	0	9	0	221	Phage endopeptidase (ACLAME 35)	atgaaaaaatcaatccaacttaagctcctagtgctgtttggtgctctacttttagccacagcaggcgttatttttatgagggagcatataataaaagaaaaacacctaaaagctattgaaccatcagcagcctcagccgtgaacgccaactctgatgatgacatggtgtatgataaagagcttccagctcaagaaaaaagtcaggtatttgttccccaatggcaatcttacacagttgctaaaggtgataacttcagtattatcggcactaacgaactgggactcactccttcagaggtaagccaaattacaacgctctctcatgcggttataaaccttactcaccttaaattggggcaaaaaatttatttcctactcaataaaaaaggcatagctgag…	MKKSIQLKLLVLFGALLLATAGVIFMREHIIKEKHLKAIEPSAASAVNANSDDDMVYDKELPAQEKSQVFVPQWQSYTVAKGDNFSIIGTNELGLTPSEVSQITTLSHAVINLTHLKLGQKIYFLLNKKGIAEQLRFPVKPDIDYLIKRQGNTFNAEKIKKSIAKTRQIYKGVITQSLARAMEEQGVPYALALHAGKLLGKRNNLRRDLRPGDQFDLITVSDQIGNKLFSPKIEAIRLYGHKINTSLFLYSDGQFYDAKGRGLEPGFMRIPLKKAYRVSSPFNLHRRHPITGVICPHYGTDFATPTGTKVIAPADGKVKRIGYQRYAGNYLAIEHYNGYITRYFHLSKVLVKQGEKVHSGQSIALTGNTGRTTGPHLHYELYKRGRAVDSMHTSLPLNR…
303	MAG14_116	MAG14_116_303	1001	21	18	63	2	17	23	14	46	9	0	0	0	3	7	0	223	Porphobilinogen synthase (EC 4.2.1.24)	atgatagagcgtctgtttcctgctgtacggccacgacgaatgcgttttagtgaattttcccgccgactaatgcgggaaaataaactaactacagatgatcttatttaccctatttttgtgcttgaagggcaagagcagcgcaaacagtgctctcccatgccaaatatagagcgcctgagcattgacgagcttattagaacagcagaagagtggataacactgggcattccagctattgcccttttccctgtggttcctcaagacaaaaaaacgctagatgctcgtgaggcctggaatcctgagggtttaattcaacgagcgattcgagctctaaagagcaactacccagagctgggcttaatcactgatgttgcgctagatccttttaccactcatggc…	MIERLFPAVRPRRMRFSEFSRRLMRENKLTTDDLIYPIFVLEGQEQRKQCSPMPNIERLSIDELIRTAEEWITLGIPAIALFPVVPQDKKTLDAREAWNPEGLIQRAIRALKSNYPELGLITDVALDPFTTHGQDGIIDADGYVLNDKTTDILVKQALSHVKAGADIIAPSDMMDGRVGAIRNALEEHSYFNSRILAYSAKYASSYYSPFRHAVGSNVNLESANKHSYQMDPSNSDEALHEVALDLREGADIVMIKPGMPYLDIVSRVKKEFKVPTFVYQVSGEYAMHMAAVQNGWLDGKAVMMESLTAIKRAGADGILTYYAIEAARVLKNM
304	MAG14_116	MAG14_116_304	2177	52	51	118	15	23	63	73	163	59	2	0	0	4	20	0	800	Polyphosphate kinase (EC 2.7.4.1)	atgggtaatttaagcaaaacagatacttctttttccgcaacgcctgaaagcagcgagtcgcctgaacccgctacccctattgaagcagttaaactcactgattttagtaatactgaatactataataatcgagaactaagccatctccagtttaatattagggttttagaacaggcttttaaagaagatattccattattagagcggttaagatttttgcttattttcagttccaatatggatgagttctttgaaattagggttgccggcttaatgcagcagattgagttttcacgcgagtatgtgggacttgatggaatgccgccacagatggtgttgagagaaattaatcaaaccatgcacgagcaggtaaagcgacaatatcgcgcattcaatgaa…	MGNLSKTDTSFSATPESSESPEPATPIEAVKLTDFSNTEYYNNRELSHLQFNIRVLEQAFKEDIPLLERLRFLLIFSSNMDEFFEIRVAGLMQQIEFSREYVGLDGMPPQMVLREINQTMHEQVKRQYRAFNESLLPALRNKGIRFLRRKELTDKQAAWIKRFFYNEVMPIISPIGLDPAHPFPRLANKLLCFIVSLEGTDAFGRETGMAIIPAPRSLPRTIKLPNDICDEGGENYIFLSAIIHQHVEDLFPGMIIKGCYQFRLTRNSDLDLEDEVEDLAKALQGELLSRRYGKAVRLEVVNNCPRPLVDFLLQEFGLSEGELYQVDGPVNLTRLMSLCNSAHDPKLIFQPFTPSFPKAFKKRSKKTKNVLDIIAREDVLLLHPFESFTPVVDMLRQAA…
305	MAG14_116	MAG14_116_305	1907	2	0	23	2	6	8	8	24	8	0	0	0	0	2	0	112	hypothetical protein	atggatagaatgcctaggtttggttccggttatagaaaaagtcatagccagtatgatagccctacttcatctaaattagctgaaaaattaaatagacgctctggaaggcaccgagtttctcttgcaaaaaaaatagttaaccagttgaataagctaaataaatcaaggggagcgcgcctaacaaaactaagacaaaaaaacattgcaagcccactatttaaagaaaaaacaaaagatagaaagtctgcactaaacagtacagataaagtacgttacaaagatgttgataacagccgcttacctttagataaaaaaaagagtgaaagtaaagcacttcgcaacgattgcaagaaagacttggacttaccgaatataccacctagtgcttcagatgattta…	MDRMPRFGSGYRKSHSQYDSPTSSKLAEKLNRRSGRHRVSLAKKIVNQLNKLNKSRGARLTKLRQKNIASPLFKEKTKDRKSALNSTDKVRYKDVDNSRLPLDKKKSESKALRNDCKKDLDLPNIPPSASDDLKIVGTIGQSLAGLNNARAQHAVNNVRHSDQAKPDIDFYGKSIAAGQAVNKVIGTVSAFEQIYDSEESLSKTNKSALDLLDATTLEQILEERKGQLISNRPITQGELKKYIKKTLVNKAKNKTMTAGLTGTFTLVGFIGTVTLLFPPLLPLLPVAAGIGLLVIGIFRRINKNRVKKKLNLLFLKIDKEQSFEIIKKSFDEKINALNKQLIARREKLKSSSYADDTINYSELADNTLFSLQHASGFIKIASRFISVLGHVASAITSVT…
306	MAG14_116	MAG14_116_306	812	12	4	32	8	17	36	34	55	12	0	0	0	4	6	0	221	hypothetical protein	atgagcgcattaacagttgccatcattcaaacatgctcgggtccttttattgaagataatattcaacaaatagaaaaactcatagaccaagagttaaaagaaccaccctctttactcttatttcctgaatgctttgcctccatggaaggcgatcttacagaggtagaaaaaaatagcctatatctgaggcattggatgcaaaaacaagctcaaacgcatcaatgttggcttgttggtggcagtattccctatagagactatgaaaaagagaagccaaggggatcatgctttgtttatgatccccaagggcatgaagtggctcggtatgataaaattcacctattcgatgttgatgtcagtgacaatactggctgttatcgagaatcagatgattatctc…	MSALTVAIIQTCSGPFIEDNIQQIEKLIDQELKEPPSLLLFPECFASMEGDLTEVEKNSLYLRHWMQKQAQTHQCWLVGGSIPYRDYEKEKPRGSCFVYDPQGHEVARYDKIHLFDVDVSDNTGCYRESDDYLAGNQLVTVPMSDFSPACLGLSICYDLRFPELYRELVSDGATIFCVPSAFTHITGQAHWESLLKARAIENQSFVLAANQGGRHPKGKETWGHSMIISPWGDILAEANSNTPTIVSARLDLILIEKFRSKMPCLKHKKL
307	MAG14_116	MAG14_116_307	770	1	2	21	5	2	11	18	26	10	0	0	0	0	2	0	105	Uncharacterized NRDE family protein	atgtgcttaatgattttttcatggcaaccagagcaaacctaccgattgattattgccgcaaatagagatgaagattataaccgaccaacaatggcagttcatcagtggcaagacattccagatattaccggcggtagagacttacaatgccaaggttcatggctagctgttagtcgtcatggtaggtttgccgcagtcactaattttcgagaaacccccgctccagaaaaattgcaatcaagaggcaagctagtcgctgattttttgtccacctcaagcacagcaaccaattatcttgataaggtacattcacaacataagcactatgcaggttttaacctgatattaggcgatcaggaaaatatcttttattattcaaacagacaacaggagatacgc…	MCLMIFSWQPEQTYRLIIAANRDEDYNRPTMAVHQWQDIPDITGGRDLQCQGSWLAVSRHGRFAAVTNFRETPAPEKLQSRGKLVADFLSTSSTATNYLDKVHSQHKHYAGFNLILGDQENIFYYSNRQQEIRMLSPGVYGLSNHLLDTPWPKLKKAKSGLCRLLDVYDNNPPATKLLGIMQDETKPIDSELPDTGVGLAKERFLSSCFIKGQHYGTRNTNILKWSSEGKLIWHEYLFDSHGNEKNVHDLIVTNTV
308	MAG14_116	MAG14_116_308	485	2	10	32	2	22	38	36	64	8	0	0	0	0	2	0	223	hypothetical protein	atgtatcagcaagtaaaaaagagtattctattctttggcactagcctgttgctagctactaccgttcatgctgaccaatcagctatttcctatacaacaccaacttcagatcctgtaattgctgtacaaaaaaaacacgtgcctatggttaacacatcgtggagccagattgccgtagcaagattttaccctgcccaagcaaaaataacgtttattttagattcaccagcgccatataaagtgattaaatttaagatggataaatcactgcagcttgaatctgcacaagtatatgatcaaaataacaactattttaagcttgcgtatcaagcaccaagcgcctcagaggaaagtgtagaaaaagatatccccccttcatttggctcaattactaaagtc…	MYQQVKKSILFFGTSLLLATTVHADQSAISYTTPTSDPVIAVQKKHVPMVNTSWSQIAVARFYPAQAKITFILDSPAPYKVIKFKMDKSLQLESAQVYDQNNNYFKLAYQAPSASEESVEKDIPPSFGSITKVVVTYKNPENSQGTIHLLGRNSVNHYSST
309	MAG14_116	MAG14_116_309	617	2	4	28	0	12	17	9	28	5	0	0	0	6	6	0	117	hypothetical protein	atgaaatactggtttcaatgcttgggtctagccgcgctgattggcttgttaaattactacccactaccttttttccctacttatgagcagatccttctgcctttggtgagcttctttcttgctctgatattaggtgttcgttttcctgatattgatctttttactccgggactaaaacaccgttcagctatcacgcattcagtgctactgccttggctgatgacactggtgggctacccagcgattgtctcagggttagccatgggtatggctattcatatgctagcagatatttttccaaaagcgtggataggtggtgcattaataaaaatgccattttttggtagccttggacgtttatctccattttggttaatgtttaactgtcttgcttgcttg…	MKYWFQCLGLAALIGLLNYYPLPFFPTYEQILLPLVSFFLALILGVRFPDIDLFTPGLKHRSAITHSVLLPWLMTLVGYPAIVSGLAMGMAIHMLADIFPKAWIGGALIKMPFFGSLGRLSPFWLMFNCLACLALGLQTTSALGEWVAVGGLSSSLLIMIWYFLREEKSMPPLLAGLMIISALFWSHYNPDFSLLSLIKSTGNTI
310	MAG14_116	MAG14_116_310	5090	16	10	46	6	16	16	10	40	16	4	0	0	2	4	0	186	hypothetical protein	gtgaaaataactgaatttttcagacgaacctcgacatcctctaatgagccagcctctagccatgatagcgttagcgtacagcaggaagctgctacatcgactattagtcacggtagagctatcagccatagaaaaattacggatagcaatgacatacaaggtttttatcgcccgccattttctgtgactcatgcagctttaagtcgtgtacaagttaagctaggtgagcttaggaaagagctgttaaagcctgagcagttccttgaaaaatatcctgaaatagttcatagatcggtcatatatgagctggtacgagacgagtctatgtcgcaggatattaaacggctctgcatggctagactttatgaactaaaaagacaactttgctcaacctccact…	MKITEFFRRTSTSSNEPASSHDSVSVQQEAATSTISHGRAISHRKITDSNDIQGFYRPPFSVTHAALSRVQVKLGELRKELLKPEQFLEKYPEIVHRSVIYELVRDESMSQDIKRLCMARLYELKRQLCSTSTFDFLKKNKGASIGKADNGSLKEVKESCLNQIKSLWDSLEDFEKEPEKWLKQLENFDNEQGLLSLADIFSAYLYLPRGKSKIDWLYQMNVYLTGELQQAEELIKKEAIKTTAKMKKQFKQWQQECNSLGISRLAYMNLDKNGLMGKLFNDNPDLAEDVLEMRLKNLREDVKNTFSTWITRRRKQALSALESLEQCLVKVKRSQADPIHLQTFLNELYQYENKFDKRPFALLLDMAFLTKPGEKEINFLEVTKYRGFLDRASDNLIQE…
311	MAG14_116	MAG14_116_311	3476	28	26	101	14	10	25	6	34	16	0	0	0	0	11	0	271	hypothetical protein	ttgctatctttagcattatcttttatttgtgatttttctcaagccggtggcggagaaaaaaattgtgaagacaaagcattgtctcttcaactaatagtcgattctttgcctgaatatgtaatactaaaaaattattcagttataaatcgcatttattatgctaataatgactttgaacatgatgaatctagctcacaatttaagctgactttatgtaaaaaaaaactaaatgtgccagatgtacaccccccccaccaagcacttaatactttagcttgtcactcggatagtctgctgccacaagagccaatagagtttgaatttaattctgaagtcagcacctcatttaattttaataacatagttatttcctggattttatcaggccaaaatccctct…	MLSLALSFICDFSQAGGGEKNCEDKALSLQLIVDSLPEYVILKNYSVINRIYYANNDFEHDESSSQFKLTLCKKKLNVPDVHPPHQALNTLACHSDSLLPQEPIEFEFNSEVSTSFNFNNIVISWILSGQNPSQSFRITHQIDDSYRASSLDESDPTTIIISNNGELKYFSATHNSPEFQESRCHYDCQPSADEQGDITITCELSHDELEPINLEQYTTLGTVTKLTQDMSAEALLQIPPLLKKPQESFIWLNQQSNRLLNYFNTDRVFHQCLSPQQRNVSSNCESITQQLQNEANHFCEEANALLSGYEQFLAFAGNTDNALISDYRNELTVLKRKLIELTNAVKKQTANMSFVLQHTTGALEPNHYEEWLAQCQHLKSILQHLIKPQVASEINSLHD…
312	MAG14_116	MAG14_116_312	116	0	3	1	0	0	0	0	2	2	0	0	0	0	0	0	8	hypothetical protein	ttgcgctggcgacctgaataccaatacggcgctggaactcctcgcaatagccttgctatgactcctcattctgtcttgttatggaatttggctgcccatacttattacagtggttag	MRWRPEYQYGAGTPRNSLAMTPHSVLLWNLAAHTYYSG
313	MAG14_117	MAG14_117_313	1340	12	1	14	4	9	9	5	12	6	0	0	0	2	2	0	79	hypothetical protein	atgaatattcggtactttagtttgttttttatttttattattgtgagttttatttcagaggcttttgctgagttaaatatatgccagcgctataaacaaatagtagaaacagaaaatcatgcttgtttatctgattgtaaagttcttcatgaacaagttctcaaaatagggggcatagatggtataacaaataaacagcttttagatgacgatcacgaatataaatatatcggatttcaaattaatggatttaatggcataacgctaacagagaaacagtttggcgcaaatcggtttcttttttttgaggaatcagatcttaaaaaagatagttttttagataaaagcttggagcgtgttaagcagtacggtttttctttttggggtgagcaagcatca…	MNIRYFSLFFIFIIVSFISEAFAELNICQRYKQIVETENHACLSDCKVLHEQVLKIGGIDGITNKQLLDDDHEYKYIGFQINGFNGITLTEKQFGANRFLFFEESDLKKDSFLDKSLERVKQYGFSFWGEQASSHYQHNDLAKSKNNPFSDCADLMDKLSSQFCMPTQKEVRNNAIFDGINIGYCHHLRAYFMDTCFLVRPMIGPDGEEQASSHIVDYKKDDFKPLLKFAYLSKGLSKGRCFVSKIRVNFHFSSTSKRLRFHQDLFKKNNLLVDHLQTMVLHSQCSNKATMSLALTSSENRYYADSDWPATSPLASYNSAARALIDSKNHVVVTPSKEHTTPLVVCDILDKPLSGYMIDQNTVYNGIEEEKEPLTKESKKTDTMIMVHGGSPLEFDNTD…
314	MAG14_117	MAG14_117_314	182	3	3	6	0	3	5	3	6	5	0	0	0	3	0	0	37	hypothetical protein	ttgccaaaagagcgacatgttataggtaagtactttactcagcggatagagcggcagaacctcaattttagaacacgtttgaagcggctgcttcgtcagtctatctgcttttcaagatcagaaaaagttcataacaaagtaatcggcgagtttatataccgagagcactatcaactcttctga	MPKERHVIGKYFTQRIERQNLNFRTRLKRLLRQSICFSRSEKVHNKVIGEFIYREHYQLF
315	MAG14_117	MAG14_117_315	134	3	0	0	0	5	1	0	0	0	0	0	0	0	0	0	9	hypothetical protein	atgaatagggaaactacccgtcaggctgtatttcaatgcatagaaggctactacaataggaaacagcaacatggcgctttggactatgccagtcacagaatagtgagaggcgcaaaaaattgcacacaggcgtga	MNRETTRQAVFQCIEGYYNRKQQHGALDYASHRIVRGAKNCTQA
316	MAG14_117	MAG14_117_316	1334	49	34	103	30	21	79	79	162	59	2	0	0	0	9	0	627	Amine oxidase, flavin-containing	atgacaaaagcaccactaaaaatagcggttattggttcaggtattagtggtttgtcgtgtgcttggcttttgtcagaaaagcatcatgttactttgtttgaaaaagaacctcggtttggtggccatagccacactgtgaccgttcaagggaaaaaaggtgatatctctgtggatacagggtttattgtttataatgagccagcttatccaaatttagtccaactgtttaattacttgaaagtgccaacacaaggtacggacatgtcgtttggcgtttctttgcatcagggtgcagtagagtattcgggtacgtcaattaacacgttatttgctcaacgaaaaaatatactgtctgtaagtttctggaaaatgctttgggatatcagtcgtttttaccgt…	MTKAPLKIAVIGSGISGLSCAWLLSEKHHVTLFEKEPRFGGHSHTVTVQGKKGDISVDTGFIVYNEPAYPNLVQLFNYLKVPTQGTDMSFGVSLHQGAVEYSGTSINTLFAQRKNILSVSFWKMLWDISRFYRLSSSWLQLLGCDITLGQLLHNNGFGQRFIYEHIMPMGAAIWSSPVDKMLDYPALTFLRFCQNHGLLQIANRPQWRTVVGGSKEYVKKIILSLGNAALSHRNIVRIKRSDKVVIVCDLQGDEWTFDQIVMATHANTALSLLDKPSDDEQSILGAFPYQRNKAVLHSDERVMPFNRRAWSSWNYHGGQHNSSPSVTYWMNRLQAIDDLPLFVSLNPALEFDASKVHGCYLYDHPIFNQNTHNAQTAIWSIQGDRRTWYCGAHLGYGFH…
317	MAG14_117	MAG14_117_317	785	11	5	42	5	9	36	30	56	12	0	0	0	0	0	0	206	Hypothetical protein COG3496	atgaaaaattcttgcatgtattcagtcaatgtttatcatcatcgactaaggccaaaagctcatcgttttgtttataaggtttcatcatggttaattgatcttgatgagctagatgagttggatcaatcgttacggtatttttcaagaaataagcccaactggttatcattttatgataaagattatggcgatggttcaataactccacttaagcagcaagtatgtcaacagttgctggctcataacatagaactgcctgatagagtttctctgctctgctttcctcgcatgttgggttatagttttaacccattaagtgtttatttttgttataaccgaaataatgtacttcttgcagtgctttatgaagtaagtaatacatttgatgaacgacataca…	MKNSCMYSVNVYHHRLRPKAHRFVYKVSSWLIDLDELDELDQSLRYFSRNKPNWLSFYDKDYGDGSITPLKQQVCQQLLAHNIELPDRVSLLCFPRMLGYSFNPLSVYFCYNRNNVLLAVLYEVSNTFDERHTYIIPCYYRLEDLYTIRQRANKKMHVSPFMAMDYCYGFRVKPPKKSLSIAINMKDADGIVFFASMTGERLEISNKGVLKQFIKMPLMTFKVMFGILWEAARLYFKGLKVYRYQPKAERVSSSLGDKMTR
318	MAG14_117	MAG14_117_318	1232	22	15	79	14	34	68	84	161	85	0	0	0	0	6	0	570	Cyclopropane-fatty-acyl-phospholipid synthase (EC 2.1.1.79), plant type	atggaagtttttaataacaacaatgtaacaagttatcgtcgattctataagccgactgttatgtatcgctggctttttaagcgatttgataggttacctatcagtgccattgaggttgctgggcctgatgggatagctagaaaaataggcaaaccggtaaacaataaccctataccaagaataacaatctatcggcagcgtgcaatttttaaggtcttgaaagatggcatgctcggctgggctgaggcttatataaacaatgactgggatacgcctgatttatttgctttaactaattgggcgatggcaaatgaacaagcattggagagcggctttcagggtaccttttttagcaaaatgttgaaccggctatttcacttactgagaccaaatagtcga…	MEVFNNNNVTSYRRFYKPTVMYRWLFKRFDRLPISAIEVAGPDGIARKIGKPVNNNPIPRITIYRQRAIFKVLKDGMLGWAEAYINNDWDTPDLFALTNWAMANEQALESGFQGTFFSKMLNRLFHLLRPNSRSGSKKNIAAHYDLGNSFYQQWLDRSMTYSSAIYEKEDDSLEQAQSHKYQRIIKLLKLQEQQSVLEIGCGWGGFAEAALKKTPLAHYKGITLSLEQLAYVKNKLKKVNLNGTVCLEDYRDVSGQYDRIVSIEMIEAVGEARWGTYFQTIANRLQSSGMAVIQAITIEDERFEDYRQGVDFIQKHIFPGGMLPSDSKIRSHVKHAGLKIEYMTSFADDYARTLEAWYNRFNDRWAEISKLGFDNHFRRMWNYYFAYCQAGFKSGSIDV…
319	MAG14_117	MAG14_117_319	164	3	0	6	2	2	9	1	4	6	0	0	0	0	0	0	57	hypothetical protein	atggatgatataaaatcagtgtcttatattatatttacgcattgtctgaatctgacttcaggtggaataagatttttttgtgatgaagacttcgttgacaagcatattcagactattgatatattgaataggatttatctgttaacaaataaaagatgcttttaa	MDDIKSVSYIIFTHCLNLTSGGIRFFCDEDFVDKHIQTIDILNRIYLLTNKRCF
320	MAG14_117	MAG14_117_320	545	5	3	19	10	7	38	36	55	40	0	0	0	0	2	0	220	FIG002577: Putative lipoprotein precursor	atgatatcaaaacgctacctatggttattatttttcagcgtactaagtcttacagggtgcagcagcatgaaagtgaatgattttaaaaataataaacccgagtttaaaatagaagattattttcaaggaaaaacccaaggctggggcatttttgaagatcgttttggtaatctaaagcgatcttttaaagtgactatgcatggctcaattgttaataatcaacttatccttgatgaagattttatctacgatgacggctctgttgacaagcgtatttggactatcgatatattgaagaataatgcttacaagggaacggcagatgatgttataggtgttgccaagggcaagcgggcaggtaatgcatttaattggcaatatgagatgaacctcccagta…	MISKRYLWLLFFSVLSLTGCSSMKVNDFKNNKPEFKIEDYFQGKTQGWGIFEDRFGNLKRSFKVTMHGSIVNNQLILDEDFIYDDGSVDKRIWTIDILKNNAYKGTADDVIGVAKGKRAGNAFNWQYEMNLPVDGRKWRVKFDDWLFLQDDNIVINRATMSKWGVKLGTLTFVFSKQEPYK
321	MAG14_117	MAG14_117_321	665	2	1	27	4	9	11	22	69	21	2	0	0	0	3	0	291	hypothetical protein	atgatgcgctacctcactgcatatttgtgcttgacgttactatctagtcaggtacttgcaaaagactgggatcagctttacggcacagaaataaccttcgatgtatatagaaatgaccactatgtaggtagctctgtcactaaatttgaacgacaacaaaaaggttggttgattaagagtgtgatgaatctaaaggtgcctattttatttctgctgtcgtataaatatttttatcaatctaatgaatattggcgtaatgacttacttcagcagttagatgttgaggaagacagaaatggagaaataaaaaaaattaacgtgcgtacaaatgaagagtcctctttattaaaaggacaaacaccattaggtaaggtagaaattaagctccctattttaact…	MMRYLTAYLCLTLLSSQVLAKDWDQLYGTEITFDVYRNDHYVGSSVTKFERQQKGWLIKSVMNLKVPILFLLSYKYFYQSNEYWRNDLLQQLDVEEDRNGEIKKINVRTNEESSLLKGQTPLGKVEIKLPILTSNHYNSDVINSDRLLNTLTGAENQYTLVFKGKEKIATNKGVIEANRYRYNGDLKDTEVWYSQSGHWVKLWFKGDDGSNIELRCVYCIK
322	MAG14_117	MAG14_117_322	788	4	4	29	13	16	33	54	84	34	0	0	0	2	2	0	275	Oxidoreductase, short-chain dehydrogenase/reductase family	atgggagaacaatataagctgtcagattgtaagttaccttggacaaacgtatgggttacgggtgcgagccaaggtattggacgatcacttactatggctttggctgctgccggcgttaatgtaatagcgagtgctcgtggtatcgacaacttgcagcagctggttgctgatagtgctgagttatcaggtgatattcatatcgtgcctttagatgtcactgattattcagctgtactcatggctgttgaagctatagaggctagctgggggaagctagatttagcggtgcttaacgcaggtacttatctaccaatgaaagctattgactttgattgctaccttattcagaagcagatggagttgaatgtgatgggagtgtgtcattgcattgaaccttta…	MGEQYKLSDCKLPWTNVWVTGASQGIGRSLTMALAAAGVNVIASARGIDNLQQLVADSAELSGDIHIVPLDVTDYSAVLMAVEAIEASWGKLDLAVLNAGTYLPMKAIDFDCYLIQKQMELNVMGVCHCIEPLMQLFKQQGQGHIAINASLAGYRGLPNSGGYGASKAALINLAESMRVEIDQRIIKIQVINPGFVKTPLTDKNTFPMPFLMDSDKAAHVLIKGLQSSRFEIRFPFGFGLIMGVLKHLPLSLYNKIIGRLSV
323	MAG14_117	MAG14_117_323	1514	52	80	207	30	39	80	53	167	34	4	0	0	2	16	0	764	Aerobic glycerol-3-phosphate dehydrogenase (EC 1.1.5.3)	atgcagcctaatcgtgctgaatctgtttttgatctttatgtcattggtggtggcattaatggcgtcggtatcgctgttgatgctgctggtcggggccttaaagttgggttatgtgaaaaaggggatttagctggcgcaacatcatcagctagcagtaagctcattcatggcggactgcgttatttagaacactatgagtttagattggtcaaggaagcgttggctgagcgagaagttttattgaaaatggcgccgcatattgcttggccactgcgtttttgtttgccacatcgccctcaattaagacccgcatggatgatcagggcaggcttatttctttatgacaaccttagcactagaatttcgttacctagctgccgaggtgttcgctttgatagc…	MQPNRAESVFDLYVIGGGINGVGIAVDAAGRGLKVGLCEKGDLAGATSSASSKLIHGGLRYLEHYEFRLVKEALAEREVLLKMAPHIAWPLRFCLPHRPQLRPAWMIRAGLFLYDNLSTRISLPSCRGVRFDSKSPLQPLFKKGFEYSDAWVNDARLVVLNAIKLRELGGEVKTRTELIAAKRQGDLWHITVQECISGKKYTLKSKVLVNAAGPWVQSLIETQLGLVSPRKIRLIKGSHIVVPRIHNESRAYILQNDDHRIVFVLPYEHDFSLIGTTDIEYKGDPSEATCSRYEMDYLCNVVNQQFKTQITKSDIVWSYSGVRPLCEDESNSPQAITRDYTIELDHNQGQAPLLCIFGGKLTTYRKLGEAVVNKLVRYFPQAGSVWTAKMVLPGGEDMV…
324	MAG14_117	MAG14_117_324	2045	10	8	18	10	8	16	2	17	10	0	0	0	2	8	0	109	c-di-GMP phosphodiesterase (EC 3.1.4.52) => BifA	atggataattttgatagcgttacaattaaaacaaaacatagcctagcacatacattattaaaaaaagtgctgcttgctgccatcattgttggtactgtcctgagtagtattcagcttatatttgacgcccatcaatttaataagcaactagataatcagacaaaaaaaatgctttctattgttaccccctctatcactgaggctgcgtaccatagtgacaccaaaatgggcgaagaggctttgtcgaggctgcaaaaaatacacgaagtacgttttgcagttattcatctgctagatggttcgacactggcttctattgaaaaaccgctttatcaaacccctttgcgattattatctgacgctattttcctccccacccgagaatatcattggcctttg…	MDNFDSVTIKTKHSLAHTLLKKVLLAAIIVGTVLSSIQLIFDAHQFNKQLDNQTKKMLSIVTPSITEAAYHSDTKMGEEALSRLQKIHEVRFAVIHLLDGSTLASIEKPLYQTPLRLLSDAIFLPTREYHWPLLINPSSTERYGILSVAIDTAYDGKAFIQRSMLMVLLGIMRAVIMALLLYCIYRALLTTPLNTLITSLTHINLEEPGKKKLIAPQEHACNELGLWVKTANQLLSSMAHNLDLRQKAERQIMTLSHYDYLTRLPNRKSLQKHLAEVLDTASHQQDQVAILCLGLDDFKSLNAQFSFNLAEHTLISLSDRIREKVSETIYIGRLGEDQFTLIMSQIEQPYEAASLAEAVLQMLREPIEINGQQITVSATIGISLFPDDGNSVDRLLQQA…
325	MAG14_117	MAG14_117_325	131	0	0	4	0	0	0	0	0	0	0	0	0	0	0	0	4	hypothetical protein	gtgggatggtattattatactggcaataaaggtagcaagggctacagctctgggttaactgaatttattataatttgctttatctgctctggtctttttagttatgtttattatggtcatattaaactatga	MGWYYYTGNKGSKGYSSGLTEFIIICFICSGLFSYVYYGHIKL
326	MAG14_117	MAG14_117_326	668	2	0	2	2	4	6	2	6	0	0	0	0	2	2	0	28	SanA protein	atgggattgatgttaccccgcataaaagtaatgataggcatcttggttgctgcgttagccggtctactgctgctcattttggtggctaatattttggtaacatccaccactgaaaaatacctttactcagatatttcaactactccatataataaagtaggcctactgctcggcactagtaaatactctcgcaccggaggtattaatgatcattatcgtctgcgactacaagccgcctatgcgttgtttaaagccaaacgaattgattacatcttgattagcggagataacagcacgccatattatgatgaacccacaactataagacacgatttattaaaaatgggtgttcctgctaaaaatatatacagagattatgcgggttttagaacattggac…	MGLMLPRIKVMIGILVAALAGLLLLILVANILVTSTTEKYLYSDISTTPYNKVGLLLGTSKYSRTGGINDHYRLRLQAAYALFKAKRIDYILISGDNSTPYYDEPTTIRHDLLKMGVPAKNIYRDYAGFRTLDSIIRAKSVFGLNKFTIISQGYLNNRALYIAFNHHIDAIAFNAGSGANSDTVNWIREILARVLALFELHLLDTEPRYLGSKIHIGEAPPT
327	MAG14_117	MAG14_117_327	179	6	4	23	9	0	12	5	22	0	0	0	0	2	2	0	85	hypothetical protein	atgaaactattggccattttattcgggcttggcttgatgttaatagttttagtaaatattgctgagcgttatggcaatccaatgggctttgatcaacaacgccgactatcccggtgggtgatagtgttggtgtttgcatccattattatacaaattatccatcatttgatgagagggtga	MKLLAILFGLGLMLIVLVNIAERYGNPMGFDQQRRLSRWVIVLVFASIIIQIIHHLMRG
328	MAG14_117	MAG14_117_328	491	2	3	38	14	10	12	29	29	10	0	0	0	0	2	0	149	Nicotinamide-nucleotide amidase (EC 3.5.1.42)	atgctagttgaatctctcgttgatgagttagctgagaagcttatagaaagatcgttaacattggttacagctgaatcatgtaccggaggctgggtaggtcagtcattaacagggctttcaggcagttctaggtggttcgcaggtggcgttatttcttattcagattcgctaaaacacaacctgctaggtgtacgacttgaaacattggtaacctatggtgcagttagtaagccagtagcttgcgccatggcaacaggtgctatcgaacaccttggtggcgatgtggcattagctgttacaggcattgctgggccttctggggctgtggcaagcaagccggtaggcactgtctggattgcttttgcttctatggtaaccgtatctgctaaatattttcag…	MLVESLVDELAEKLIERSLTLVTAESCTGGWVGQSLTGLSGSSRWFAGGVISYSDSLKHNLLGVRLETLVTYGAVSKPVACAMATGAIEHLGGDVALAVTGIAGPSGAVASKPVGTVWIAFASMVTVSAKYFQFSGNREAIRYQSVVAALEGMLDFVREHETL
329	MAG14_117	MAG14_117_329	1040	32	31	115	36	23	71	81	164	60	0	0	0	0	29	2	683	RecA protein	atggacgacaacagaaagaaagcattacaagctgcccttggtcaaattgagcgtcagtttggcaaaggtactgtgatgcgtatgggtgaccaaaagatagaagccattccagctatctctacgggttctttgcagcttgatattgctttgggcattggcggattgcctaaagggcggattgtagaagtatatgggccagaatcatcaggcaaaacaacccttacccttagtgttattgcgcaagcgcaaaaacaaggggcaacctgtgcttttgttgatgctgaacacgcacttgaccctgagtatgccaaaaagctgggtgccaatgttgatgatctttatgtatcgcagcctgataccggagagcaggccttagaaattaccgatatgctagtgcgc…	MDDNRKKALQAALGQIERQFGKGTVMRMGDQKIEAIPAISTGSLQLDIALGIGGLPKGRIVEVYGPESSGKTTLTLSVIAQAQKQGATCAFVDAEHALDPEYAKKLGANVDDLYVSQPDTGEQALEITDMLVRSGAVDVVVVDSVAALVPKAEIEGDMGDAHVGLQARLMSQALRKITGSIKQANCLVIFINQIRMKIGVMFGNPETTTGGNALKFYSSVRLDIRRTGAVKNGDEVIGNETRVKVVKNKVSPPFRQAEFQILYGKGIYRMGELLELGTKLKLIDKSGAWYAYKGNKIGQGKANAAQYLQDNTEVAVEIERMIRAELLNVVPASEEKNSQEKSKQPV
330	MAG14_117	MAG14_117_330	833	8	7	15	7	2	10	12	13	5	0	0	0	0	7	0	89	putative Bax protein	atgcttaaaaaaattgaccttattatgctttcaattctggttattttaacacttccaacttattggttaagtgctgttaactcttcaggctctcatgatatttcaaccattaaaatcaaatttagtgctgctactagcaatagtgcacacgagccagaaactaaaatacctgactttagtcaaataacagataccaagaggaaaaaacaggctttctttgatttcatgctctcgatggtgactgcccaaaatgaagcattattaaccttaagaaaggctgttcaaactttggaacaagatgctcaacttaccactaaaaataagcagtggcttgctaaactcgctaagcattatcaagtcaatatgccagaaaaactagatgctttatttttttctcgc…	MLKKIDLIMLSILVILTLPTYWLSAVNSSGSHDISTIKIKFSAATSNSAHEPETKIPDFSQITDTKRKKQAFFDFMLSMVTAQNEALLTLRKAVQTLEQDAQLTTKNKQWLAKLAKHYQVNMPEKLDALFFSRLLARVDIIPASLALAQAANESAWGTSRFAQQGNNLFGQWCFTKGCGIVPTGRPSGATYEVRKFSSPSDSVRAYMYNLNTHHQYKHFREIRAAQRAKQQPITGLILAEGLRGYSTRGIDYVNELINMIRYNNLVNYDAVKAMPKK
331	MAG14_117	MAG14_117_331	143	0	0	6	2	0	4	1	1	2	0	0	0	0	0	0	16	hypothetical protein	atggaagacctcgactttccaccgttttttttagatcatcctgatatctttggcatcataatcatgatcactgcaagctcggtagagaataccttcgcttccgtctttatttttaaagacttatcagatgatgacaataagtaa	MEDLDFPPFFLDHPDIFGIIIMITASSVENTFASVFIFKDLSDDDNK
332	MAG14_117	MAG14_117_332	863	8	4	30	2	18	14	34	48	26	0	0	0	0	4	0	193	hypothetical protein	atgatcttgaatataaacgaaaaaaatgtactgattacaggcggagctcaaggcattggccgcctttttgctaaaaaagcgatcgaagaaggcgcaaatgtcattctctgggatattaactccacctctttagagcaaacagcaagagaactacgtaaaaaacaaggcgccaatgtattcacttacaccgttaatgtatcatccgttagcgccattaatgaagcagccaaacaggtttttaatgatgttgggacaatcgatatactatttaacaatgctggcatcgttgttggaaaaccctttattgaacacacagaagcagacattgataaaacactggcgattaatacagcaggtcctatgcatgtcaccaatgcttttatgcacggcatgatacgt…	MILNINEKNVLITGGAQGIGRLFAKKAIEEGANVILWDINSTSLEQTARELRKKQGANVFTYTVNVSSVSAINEAAKQVFNDVGTIDILFNNAGIVVGKPFIEHTEADIDKTLAINTAGPMHVTNAFMHGMIRNGGARIVNIASAAGLVANPKMSVYAASKWAVIGWSESLRLELERAGHDIKVTTVTPSYINTGMFQGVKTPFFVPLIQPQKIVDLTWEGMKKGKIYVRAPKMVNLLPFLRGILPTRVFDFIGGKLIGIYNSMDEFKGHTAPTPTQDQDQDPAMHQ
333	MAG14_117	MAG14_117_333	1643	11	16	59	16	18	62	55	105	26	2	0	0	4	20	0	397	CTP synthase (EC 6.3.4.2)	atggctcgttatatattcgtcacgggtggcgttgtttcttctttaggtaaaggcattgcctctgcttctcttggggctattcttgaggcgcgtggtttgaatatcactatgctcaagttggatccctatattaatgttgatccagggactatgagcccatttcagcacggcgaggtttttgttaccgaagacggtgcagaaacggatctagatctggggcattacgagcgctttattcgcactactatgacccaaaataataactttactacgggccgtgtttatcaggatgtgcttcgtaaagagcgtcgcggtgactatttagggggaaccgtgcaggttatccctcatattactgatgaaattaaacgccgtgtggttcaaggtgctggcgatgct…	MARYIFVTGGVVSSLGKGIASASLGAILEARGLNITMLKLDPYINVDPGTMSPFQHGEVFVTEDGAETDLDLGHYERFIRTTMTQNNNFTTGRVYQDVLRKERRGDYLGGTVQVIPHITDEIKRRVVQGAGDADIALVEIGGTVGDIESQPFLEAIRQLKVELGHQRAMLMHLTLVPYIQTAGETKTKPTQHSVKELRSIGLQPDILICRSEKHIDASARRKISLFTNVEERAVISLQDADTIYRIPRMLTDQSLDQIVVERLGLSCPEADLTEWNDVLRRELNPQHEITIAMVGKYMELLDAYKSLIEAVHHAGLKNRVKVNIRYVDAETIEQQGLSSLEDVSAILVPGGFGNRGIEGKIEAVRYARENKVPFLGICLGMQVAVIEYARNKAGLLEAN…
334	MAG14_117	MAG14_117_334	854	7	10	27	8	2	44	18	71	24	0	0	0	2	18	0	231	2-Keto-3-deoxy-D-manno-octulosonate-8-phosphate synthase (EC 2.5.1.55)	atgacgcagaatagagcagttcctatcggtgatattttagtggcaaataaccggccttttgtgctttttggtggtatgaatgtgctggagtcaagagatatggcaatgaccattgctgaagagtacgtcaaagtaacagaagagttaaagattccctatgtattcaaagcatcctttgataaagccaatcgctcttctattcattcttatcgtggaccaggtctggaaaaagggctaagcattttaagggaactgaaagaacagtttcatgtacctattattaccgatgttcatgaaccagagcagtgtcaggcggtggcagatgttgtcgatgttattcagttgcctgcttttcttgcacgacaaacagacttagtggaagcaatggcaaaaacaggt…	MTQNRAVPIGDILVANNRPFVLFGGMNVLESRDMAMTIAEEYVKVTEELKIPYVFKASFDKANRSSIHSYRGPGLEKGLSILRELKEQFHVPIITDVHEPEQCQAVADVVDVIQLPAFLARQTDLVEAMAKTGAVINVKKPQFLSPSQMVNIVDKFRECGNKNIILCERGSCMGYDNLVVDMLGFQTMKKVSDGLPVIFDVTHALQCRDPMGLASGGRRHQVAELARAGMAVGLAGLFLESHPDPDHARCDGPSALRLSTLAPFLKQIKALDNLVKSWEPLDTH
335	MAG14_117	MAG14_117_335	122	0	0	0	0	0	0	0	0	0	0	0	0	0	0	0	0	hypothetical protein	ttgtcgctatatcataagaaaaataattttatgaataaaattaatggtctttttcttttattttttattgctgttttctcactaaaaaataaaaataaacaaatttttcataagaatagatag	MSLYHKKNNFMNKINGLFLLFFIAVFSLKNKNKQIFHKNR
336	MAG14_117	MAG14_117_336	15557	54	64	171	30	67	111	71	196	45	2	0	0	12	45	0	868	Eukaryotic domain protein	gtgaactcatctaataatccagctataggactgcttaagtcttccagtaagtctattgaagtgataaacagcaagggtgaaatcagggtagttagtgttggtgatattatttatcttgacgatgagattttaaattataccgagacggatattattattagattaattgacgggcaattgttaattgttgctcctagcgaaaaaaaaattatcggtaaaaatcttcttgatcaagatgtggatgattctcttgtagaagaagatgatgatagtaatagcagcacagatattgacaatgcatccttgttaaacaatgactctgaaatagatgaagagtcaagcagttcagacagtattaatgctgaaaaaccagaagaaataattcagagttcaaagact…	MNSSNNPAIGLLKSSSKSIEVINSKGEIRVVSVGDIIYLDDEILNYTETDIIIRLIDGQLLIVAPSEKKIIGKNLLDQDVDDSLVEEDDDSNSSTDIDNASLLNNDSEIDEESSSSDSINAEKPEEIIQSSKTDKIELIIERDKKNSEGEEYQSVETDSEESERISSVNLRSLDLVTPSLTTATTAINVTDTNDRPVVSQGVFSEANENASNYTVNLLEHAIDVDDDSSLAVSDGSISWVSGDARGIRIDDSQLTVQPVIYNNLALGEQETIVYQYSIEDGEGGTVDQTASITVTGRNDSPTVSSIIERSVSEDSNQIQIDLLAGASDIDNSDILSVQENSLTLVSGNDAGVVIIDSTLTIDLQSYQYLKSEETNRIEYSYTIEDSNGGFVPQTAILTI…
337	MAG14_118	MAG14_118_337	74	0	1	3	0	0	0	2	5	0	0	0	0	0	0	0	30	hypothetical protein	atgagacaacagtaccccagcgatatcactcgtgagcagtttgaacctattcttccgatccttgaaagtgctcgc	MRQQYPSDITREQFEPILPILESAR
338	MAG14_118	MAG14_118_338	128	4	1	4	2	0	3	10	16	4	0	0	0	0	1	0	60	hypothetical protein	gtggcgtttcacactggcggtcatgaagaagtacaaaccaaagttagtaaagctttgcttgagtttatcgtagcgagagacaacctttataatttgcatgctgctcttcgctatgctggtgaaccctaa	MAFHTGGHEEVQTKVSKALLEFIVARDNLYNLHAALRYAGEP
339	MAG14_118	MAG14_118_339	2702	17	20	92	8	22	31	49	110	28	2	0	0	0	4	0	388	[Protein-PII] uridylyltransferase (EC 2.7.7.59) / [Protein-PII]-UMP uridylyl-removing enzyme	atggcaacactatttcagataattccgccaaaacttaaacatgctctgtttgacagagggcagtttcgagccgatcttaccctttcccgcaacagtcccatccccgcctataaaaaatgtcttcgcgaagcagtagtaacactaaaccagtggtttgataatggcgtcgatatcaatatgcttgtcaatgctcgggcatggttaatagatcaggttcttactttggcgtgggaatattacgaccggtctgactgcactgatatcgcattactagcggtaggtggttatgggcggggggagctgcaccctgagtctgatattgatcttttaattctgcttgaacacggtgactatcatgctcaccagcaacatgttgaaccttttttaaggttattatgg…	MATLFQIIPPKLKHALFDRGQFRADLTLSRNSPIPAYKKCLREAVVTLNQWFDNGVDINMLVNARAWLIDQVLTLAWEYYDRSDCTDIALLAVGGYGRGELHPESDIDLLILLEHGDYHAHQQHVEPFLRLLWDIGLTVGSSVRSLKECCEQARNDLSIITNLMESRIIAGPSRLYDMLQNSISVDNMWPSKLYLQAKFEEQRKRHRKYNDTEYNLEPDIKSSPGGLRDLHMLGWVVRRHYGTIDPSELVDLGFLTLEEHQLLIRCRVFIWKIRWALHRHCQRCEDRLLFDHQENLAERFGYKDDKGSLAVEQFMQSYFRTVMTIAQLKDLLLQHFDDDILKADEKDNIKQLTERFRIRNNYIETVNKQVFAEYPPAILEMFVLMTRHQEILGARAETI…
340	MAG14_118	MAG14_118_340	809	46	28	81	12	18	74	50	139	38	1	0	0	2	31	0	534	Methionine aminopeptidase (EC 3.4.11.18)	atgaatatcatcataaaaaaaccagacgctattgaaaaaatgcgtacagtgggtcgtctggctgctgaagtattagaaatgattaaaccctatgtaaagccaggtgtaactacaggcgagctagatcgcttgtgtcatgactatatcgttaatgaacaaaaaggcattcctgcgccactaaactacggcgcaatgcctggacgcaaagcatttccaaagtctatctgtacttccattaatcaggttgtttgtcatggtatacctagcgagaaaaaaatattgaaagaaggagatattgtcaatattgatgtcactgtgattaaagatggctatcatggagacaccagcaaaatgtttgaagttgggcatgttcagtcttttaaccaacgcttaatcaaa…	MNIIIKKPDAIEKMRTVGRLAAEVLEMIKPYVKPGVTTGELDRLCHDYIVNEQKGIPAPLNYGAMPGRKAFPKSICTSINQVVCHGIPSEKKILKEGDIVNIDVTVIKDGYHGDTSKMFEVGHVQSFNQRLIKVTQECMYKGIEQVKPGARLSDVGRVIAHHAKNNRYSVVEEYCGHGIGRGFHEDPQVLHYDGYSDRNDCILQEGMIFTIEPMINAGEKGTKLLADNWTAVTKDRRPSAQWEHTILVTADGYEILTLRKDEEHSRTPI
341	MAG14_118	MAG14_118_341	1622	20	17	29	19	10	33	19	70	14	0	0	0	2	18	0	251	NAD synthetase (EC 6.3.1.5) / Glutamine amidotransferase chain of NAD synthetase	atgtcatcatcgctcactattgttatggctcagttagactttctagttggggatattgatggtaatacatcgaaaattattgatgcagcaaaacgtgctcgtgacacgcttcaagccgatataatcgtttttccagaacttaccctttgtggttatcctcccgaagatttacttctcagacctagtcttattgttcgcagcgaacaggcgttaaagcgcttatgcaatattcatggtattgaccttgtggttggtttggctacaacaggtaatgttgggctagagaatcaagcgtttgtgatcagagaaggtgaagttattagacgttacagtaaaaaacacctgcccaattatcaggtttttgatgaaaagcgctatttttcaccgggctcaggtctt…	MSSSLTIVMAQLDFLVGDIDGNTSKIIDAAKRARDTLQADIIVFPELTLCGYPPEDLLLRPSLIVRSEQALKRLCNIHGIDLVVGLATTGNVGLENQAFVIREGEVIRRYSKKHLPNYQVFDEKRYFSPGSGLGLFDCKGTKIALSICEDMWYPWPAQAAKAAGAQMIISLNASPFHRDKLHLRKEVIKARCLETGLPVLYTNLIGGQDELVFDGGSFAMNADGNVVAGAPYFKEGLFPVDFKPSTGAFISGDIIETPNLLSRIYQALVIGVRDYVNKNGFKGVVLGLSGGIDSGLTLAIATDALGPERVQAVMMPYRYTSKISLADAEEEALLLGVDYKVLAIEPIFNAFTDTLAHIFEGYEEDTTEENLQSRSRGVLLMAISNKQGYLLLTTGNKSE…
342	MAG14_118	MAG14_118_342	2090	10	2	16	8	8	20	10	24	8	0	0	0	2	7	0	115	hypothetical protein	atggaacagtatgtgcgggatgtaactcgactattaattgtcgatgctaacacggaagcagcagaccatttggttaatgtgtttcgtgattcaggacaaacaacccgagcacagcatataacagatattgaagcactggaaaaagcatttctggaaaaaaaaaagtgggatttactgattatttcgcaactaccagatcagctcacactggatatattgctggaaagccttgaacatcaaaatgcagatataccgatcattattattgatgatgcagacggttatgagcaagttaattatcttagaaaggaagtcaaagctgttgtgccttctgggcagcaggacatgctgttgttgaaagcgaatcaagaaatagaaaatctctatatacgccgtaat…	MEQYVRDVTRLLIVDANTEAADHLVNVFRDSGQTTRAQHITDIEALEKAFLEKKKWDLLIISQLPDQLTLDILLESLEHQNADIPIIIIDDADGYEQVNYLRKEVKAVVPSGQQDMLLLKANQEIENLYIRRNYRRMSIALNESERQRRMLLDDEIDAIIYLNDGVIRYANPAFADLLGKPKDYVFEGMTFADIVTDTDHEHAAAFIENMEETGQALGVLQCSISLEPDNPIAIRAIIKPTSYDGTFSLSMQIKSADSSVIEAVEKNSVEEEQDSLGSVSIELKTKSELLTLLEISVQQVASGKAQLTLVHVSIDGLSDIHKDKGIRVSQKLERMVGDQIVVTLSTEHVVSSLGGGVFLLLLHTGSETEVNGITAKLLKELSLLSLEDKSINISLSMGA…
343	MAG14_118	MAG14_118_343	383	0	0	0	2	0	0	2	0	0	0	0	0	0	0	0	4	hypothetical protein	atgaaaggttttacattagttgaattaatagctgtggttgccattgttggaatattagctggcataggttatccctcatatacaaaatatattacggaatcaagacgaactgaggcgatggctttcttgctctctgccatgcagaggcaagagcggtttttcactaaagaaatggaatatacaaccagtatgaggcgtttgggctattctagcagcgaagtcactacagagggtgggcattatcaagtgtcagccagttattgcacacctgatccttgcgttaagttaacagcgatacctctgggcgtacaaaaagatcgtgataatgacagtaggttaagccttgactccctaggtcgtcgaaccggtaactggaatgattag	MKGFTLVELIAVVAIVGILAGIGYPSYTKYITESRRTEAMAFLLSAMQRQERFFTKEMEYTTSMRRLGYSSSEVTTEGGHYQVSASYCTPDPCVKLTAIPLGVQKDRDNDSRLSLDSLGRRTGNWND
344	MAG14_118	MAG14_118_344	3401	25	8	83	15	28	45	39	66	18	2	0	0	4	10	0	349	hypothetical protein	atgaatacatgtatctctagcaacaaccttctattgtattttttgaaaacttttttactgttattattatttcctgcatctgcgctatcagatagtatagactatgatttaaaagacttggtaaagaatacattaggcttaacaggtaaccctttagcagataatgatattcctgatattaatcaatctaagctggctcagcttggacgagaattattttttagcaaaagccttagtttaaattttgatgttgcttgtgctagttgccatcacccctttctagccggaggcgatggactatccttatcgattggggttaatgcaattgatccttctgtagtgggtctaggacggcgacatgatggtaatttccatattgatccagaagctgatggcggg…	MNTCISSNNLLLYFLKTFLLLLLFPASALSDSIDYDLKDLVKNTLGLTGNPLADNDIPDINQSKLAQLGRELFFSKSLSLNFDVACASCHHPFLAGGDGLSLSIGVNAIDPSVVGLGRRHDGNFHIDPEADGGPNVERNAPTTFNSSLYQHAVLNDGRVERILWQNGQYISSHEAIAQHPLSLANGAKKNNKKQLFKTPESLFRAPDHLAGSSLLQAQARLPVIAAAEMRGFSSHFGSNNAVRAYLAKRLQEKTKELKNTTWEIHFRQAFNDDADKPLDKVITFERITLALAQYQSSQVFLNNSWRAYLEDRGNLSTRAKKGALLFYTEVSRGGAGCVSCHSGDFFTTEKYFNLAIPQFGRGNFVYGQDLGRHPITRRNEDMYAFRVPSLLNVAETSPY…
345	MAG14_118	MAG14_118_345	1121	2	0	13	2	12	10	6	16	9	0	0	0	1	3	0	74	hypothetical protein	atgaaaataaagtcacaacgatattccggctatgtactgcccgttgctatggcgattatgtctattttgacatttacgatgttgggggtaatggaaacttctcaagtagaagaaaaaaaatccagtaatgaacagtatcgccgtcttgtggagcagatagcgcgctctgaattgaagcgtcagagccaataccttgaaaaaaataaaggcttattacagcgatcggaaaacagcaacctaccagcaaaccttttccaaaatggctgtgcttcaacaaataaagccgcagtatgtcagaccgttacccttgaatttctcaaaacttttccaaagccccctcaacttcaagccagtgttcctagagcaacctttgtcggtaggcagtttcgaataacgtca…	MKIKSQRYSGYVLPVAMAIMSILTFTMLGVMETSQVEEKKSSNEQYRRLVEQIARSELKRQSQYLEKNKGLLQRSENSNLPANLFQNGCASTNKAAVCQTVTLEFLKTFPKPPQLQASVPRATFVGRQFRITSTAEHKRSGAVAEMSMDLKYAELEIWLRRDIPDYLGKYPDRDELISILDFYIPSWWEVTVLSPWRIGCVAPSPDVLTMLTGFLTAAGFLLPGVGNAATSALTAALSASLVTAGVAAGAAGGFVSGSIGFVTSCSVDYVDRQGISRSWNSGTMYAGTTKVFIVPEGSRNVTHYWSALAPGRAAGYHGFWDWGVIKWWRVKHADWNLPTAVDLCKVAHGTSEELKFDTCPFGMLDDVTPVIGP
346	MAG14_118	MAG14_118_346	1010	10	2	12	6	4	0	8	5	2	0	0	0	0	0	0	61	hypothetical protein	atgaaacagtcaggcttgtctttaatagaagtgatgatctcagctttattatcagtagtgataattcagggattttttcaaatgtttttttctaatttaatgacatctaattttcatgaaacgcgggcgcttgctaaaaaccgtgcgcaacatgccttttttcttatggggaatgatattcgtgaggcaggctctgggacagctttggtaggacccggcagttatcatattagctacaatacacgtttttccggaagtgtagtagtgcaaaataatcaaggaataagtggctgtaaaggtcgttgcaataatgatgcgtcctgtacaggctttagttgggcaagtagctttattgtttctgacacaggggctggtcagtgccgtttaggatcgggtgag…	MKQSGLSLIEVMISALLSVVIIQGFFQMFFSNLMTSNFHETRALAKNRAQHAFFLMGNDIREAGSGTALVGPGSYHISYNTRFSGSVVVQNNQGISGCKGRCNNDASCTGFSWASSFIVSDTGAGQCRLGSGEPSQTAANGWVTYLKLVNRVFYIGNCGGAPCTQEGLGNRSDTIAVVLDPYHDQDCVGQNVIGPVINRYFISADLEGKNGLFCQSYFYPSGGVKAPPQLMVEGVEQLQLLYGYADNGGERATSYRTANAVTNWGYVRAVQIGFLVGGGYLWGDNTVLQSRSYNLLGSSTLTLTDREPRYPFTMLQSIFTTHSNTNWREKQFFEVD
347	MAG14_118	MAG14_118_347	1286	0	0	2	0	0	1	0	6	0	0	0	0	0	0	0	9	hypothetical protein	ttggttaataaaaaacaagatcaatcaggtgtaagtttgattgaagtgcttgtgagtgcagttttaatatccatgatatttttatggattagtgatacccatattgctagtctaacagatattgctgatacaaataataggaataaagctgtttggttggcggaagaaatgattgaaagaataaaaattaatccgcttattgataagtataaagatgaaattagcagtacaaacgacataacttcctattgcctttcacttgttcgatgtttaaatcaagagtgttctgaagatgaaattattaaatatgatatccaacaggttttttgtaatgacctgaaaatgctaaatgatatggaaatatcattagagtgttttgatatcaatacaggacagctt…	MVNKKQDQSGVSLIEVLVSAVLISMIFLWISDTHIASLTDIADTNNRNKAVWLAEEMIERIKINPLIDKYKDEISSTNDITSYCLSLVRCLNQECSEDEIIKYDIQQVFCNDLKMLNDMEISLECFDINTGQLLNPCYKKGMLRGRVTVSWRSNDATRGKLSAYSEVLFVINQSLYFDGINDYLTINGSLFSNEFLAADGGLASHDFTISMWVKPEDISRYQGFFGKDELDNIYPRSPSLYVTNQGRLRYDSYDSLLAVDRRLGNTNGFFTKLYVIDGGMTRSSSYNGPVDIDRFFGETNTFFKKNQWSHVAWIKKEEDYFFYKDGVLLLSRKGVPGTLHSKSNNWIGRVDGYFKGEINDLQIYGSALSEEQLLGVMEGHQFEDKNLLLYLDFEGDNFS…
348	MAG14_118	MAG14_118_348	539	0	0	2	0	0	1	0	0	0	0	0	0	0	2	0	5	hypothetical protein	ttggctacaataaataaaaaacatggtggttttacattgattgaattgctaatcattgtggcagttatgggaatactatcagctacttttgtgaccatggggagtttaattagggatttcagggtgaattatatcagtcaacgcctatatagttctattttattagctagaagtgaagcgataaaacgaggtgaaaatgtatccttgtgccggagtgctaatggctctcaatgcaatccaggtgataactggagcgatggctggcttgttttttatgatgataatggtaacagaatagttgatggggcagatcaattaattcgtgtttataatcagatatctagtgattttttattaaattggaatgggcctgctgaaggtttctattttaatgggcgg…	MATINKKHGGFTLIELLIIVAVMGILSATFVTMGSLIRDFRVNYISQRLYSSILLARSEAIKRGENVSLCRSANGSQCNPGDNWSDGWLVFYDDNGNRIVDGADQLIRVYNQISSDFLLNWNGPAEGFYFNGRGQVDFTNNYMFKLCLLGINDSAIREITVYGSYFGDRLKSVLGRGNC
349	MAG14_118	MAG14_118_349	4703	26	6	57	16	17	36	20	67	16	4	0	0	3	2	0	273	Type IV fimbrial biogenesis protein PilY1	atgaataatgtcatggagtggcaatacaaaatagggatgtatttttttttattaatggtggcctttaatacttatggagcaccttctgctaatctctattcagccattgtaccatcgataaaaaaaggagctgatccgctgattatgctagtgatgtcagttgatcacaatttatttaaaaaggcatatagcgattattctgacttggataatgatggtgtactagatacgacgtataacgatgcatttgattatgccggctatttcgataatcaatggtgttatagttataacacaacccaaggatattaccagcccagtgttccatctatcggcgctcatatgcatttttgcaacactggatctggtctctggagtggtaattttctaaattgggcg…	MNNVMEWQYKIGMYFFLLMVAFNTYGAPSANLYSAIVPSIKKGADPLIMLVMSVDHNLFKKAYSDYSDLDNDGVLDTTYNDAFDYAGYFDNQWCYSYNTTQGYYQPSVPSIGAHMHFCNTGSGLWSGNFLNWATMSRIDLLREVLFGGKRFKDTKEQTVLERTFLPKDLHAFAKVYRGTEVAPVSSLTPFNESSISLCNLTVTEKGPPIVRVASNAWPRWALTEEEQCQWAARHSPSSLDRLAEHNVYITSCVPDKDARNKHRCKRYKQGNHKPIGLLQRHGDAGNIQFGLISGSYDKNSSGGVLRKHIMPFAGHLDSSKDEINLDTGIVNTDLKGIIHHISTFRIAKYSYSTSRYLDCNLPNISVATFLSEPSRLVSSDRHCSNWGNPLAEMYLEALR…
350	MAG14_118	MAG14_118_350	539	6	0	15	4	3	12	8	16	1	0	0	0	0	6	2	73	hypothetical protein	atgaggtgtcagggaagcactttgttagtgtgtcttattttactggtgatgttaactattgtagggctggctgctattgactcgtcaagtcttgaggaaaaagtaactggaaattttagagatttgcaaacagcatttcgttccggtgaggaggggttgctcaaagcagaggcattcgttaaagatactaatcttgatttagctcgatttaactctgcttgtcagaaaggcctatgtttttttggtaccgatgctgagagcatcgctaattgccgtgcgggggtatcatcaccttggcgagatcaggatatatggcaagatgccgctcgcacacaggcgcttactatggatcttaatggtaggctgttaaaagcactgtatattgtagaatttcgctgc…	MRCQGSTLLVCLILLVMLTIVGLAAIDSSSLEEKVTGNFRDLQTAFRSGEEGLLKAEAFVKDTNLDLARFNSACQKGLCFFGTDAESIANCRAGVSSPWRDQDIWQDAARTQALTMDLNGRLLKALYIVEFRCYLARDIEGPDPDITNVNEWLQFYRITVKAYGNGDNTSVMLQTTYTK
351	MAG14_118	MAG14_118_351	1046	8	6	21	4	11	7	10	23	8	0	0	0	1	0	0	99	hypothetical protein	atgagcaggcctatgggtttctctctggtggaacttataatagctttattactaggtatcctacttactgctggtgcaggtaaagtgtttttatcaactaataaaacctatactttgcaggatcagttgattcgtatgcaggagaatgctcgaaccgcattagagttactggtaaaggatatccgtatgtcaggctatacgggttgtcctgtatctgccaatctggggaatgcgctgcaggcaaaggagcaggggcgattatggatgacgcactttgataaaggcttgatgggtattccttcaggcaatcgtgtcaaaagtgaaattgacccttatgcgttatctgaagccgttattgtccatagagttgattggcaaaatagtttttctgtattacac…	MSRPMGFSLVELIIALLLGILLTAGAGKVFLSTNKTYTLQDQLIRMQENARTALELLVKDIRMSGYTGCPVSANLGNALQAKEQGRLWMTHFDKGLMGIPSGNRVKSEIDPYALSEAVIVHRVDWQNSFSVLHQNTETATLYLSALHRFNQGDLLALVGQNCKQISVFIAGFDTKDARVTYPVENSRLLSNCTGLNKGDFNCISKQKESNIFDHTGSQLVPISTTAYYVRESAGVPVLYRKRAGEMVSGSTLAAEALVEGIENMRVLYGYDTDNDGVVNQYLPPIDMMPYSDDWKKILSIKVELLVRSLRETAAEPDPYFFAGKKVIPKNHYIRRVVVATVDLRNRGY
352	MAG14_118	MAG14_118_352	509	4	2	2	0	1	4	1	5	5	0	0	0	0	2	0	27	hypothetical protein	atgatcactaaagagaataggcaaaaaattagaaaaatatctggttcaggctttgttgaagtgcttctttccttattaatcatttctttaggagcactgggtatggtcgctttgcataaccgtagtcttcagtataatcaagtagcttattaccattcgcaggctattattttggccacagatatgctggaccgacttcatattaatcgtacacaagcattaataaccgatatttaccgtacttcaataggtgatgctatttatgattcttgtgatgatggatcttatccagataactgtgagttgggtcaatgttcgacggaacaacttgcacgctatgatgtgagtcagtggaagttttatcttttatgtcatttacctaatgctatgggttccata…	MITKENRQKIRKISGSGFVEVLLSLLIISLGALGMVALHNRSLQYNQVAYYHSQAIILATDMLDRLHINRTQALITDIYRTSIGDAIYDSCDDGSYPDNCELGQCSTEQLARYDVSQWKFYLLCHLPNAMGSIDYKDGVYGRTYTITVSFENNSNAALKSMNVVLKATL
353	MAG14_118	MAG14_118_353	527	5	0	7	3	4	14	7	12	7	0	0	0	0	0	0	65	hypothetical protein	atgcgtttctatgatgagaatggattctcattgatcgagcttatggctacattgagtatcgctgctattcttgcagcgttggctatacctaacatgaggtcagtattggcggggcatcgagttgctgttgtcacgaagcaattgtatggcagtattatgttggcacgtagtgaagcggtaaaaagagcggattttgtcagcttatgccgttcaacccatgtgggattatgtgctggtgatggtaataactgggcatcaggctggctggtttttgcagacaaaaacggtaacggtatgcttgatggtgatgaggaaaaaataaaagtttatcaactatcttcggagtccatgactattgattggaatcgagggccatttttacggatgaatagtaggggg…	MRFYDENGFSLIELMATLSIAAILAALAIPNMRSVLAGHRVAVVTKQLYGSIMLARSEAVKRADFVSLCRSTHVGLCAGDGNNWASGWLVFADKNGNGMLDGDEEKIKVYQLSSESMTIDWNRGPFLRMNSRGQAVDSGTFTLCESTSEDHVSVRVITVSLTGRARIAMPQMCQS
354	MAG14_118	MAG14_118_354	2243	40	46	149	28	46	51	113	168	83	0	0	0	6	14	0	744	Inactive (p)ppGpp 3'-pyrophosphohydrolase domain / GTP pyrophosphokinase (EC 2.7.6.5), (p)ppGpp synthetase I	atggtcaaggtaagagaggatcatcccgttcgttatgatggcactgttgatttagatgcttggttgaatcgtttaggtgaccattttgaaggtatggatacagcgcgcctcaaagaagcctgtgaaataagccgccaagctgatcagaatgcaagactgcaagcaaatactgcatggccatcgggtcttgggtgttttagaacagggcttgaaatggttgaaattctcgctgagcttaagctggatcttgactcattgatagcggctgttctttatcgttctgttcgtgaacgtaaactttctattacaaaagtcagtgaaacctttggtgcttcagtggcgcgactgatccgagatgttcaaggtatggcggtgatcagtaccgtattggatccagcg…	MVKVREDHPVRYDGTVDLDAWLNRLGDHFEGMDTARLKEACEISRQADQNARLQANTAWPSGLGCFRTGLEMVEILAELKLDLDSLIAAVLYRSVRERKLSITKVSETFGASVARLIRDVQGMAVISTVLDPARKQVLDQGQDQLDKVRKMLVSIIDDVRVALIKLAERTCAIRAVKDADKEKRQRVAREVFEIYAPLAHRLGIGYIKWELEDLSFRYLKPHDYKKIARLLDGKRINREQYIDNVVSTLRASLKDAHIEADVAGRVKHIYSIWRKMNRKGIDFRDLYDIRAVRILTHQVRDCYASLGVVHGIWNHIPQEFDDYIATPKENGYRSLHTAVFGPEGKTLEVQIRTHKMHDEAELGVCAHWKYKGTDVNNQNDSYEEKIAWLRQVMEWHEEL…
355	MAG14_118	MAG14_118_355	128	5	5	33	1	4	11	10	7	4	0	0	0	0	4	0	87	hypothetical protein	atgattggtataactattaacgttaaaataattgttttacaaggttgcttttcagttcatcaaggagtaattgctacatttgatgacttgagtatgtgtattgatgtcgagtcatggagtgtcaactaa	MIGITINVKIIVLQGCFSVHQGVIATFDDLSMCIDVESWSVN
356	MAG14_118	MAG14_118_356	1169	6	4	21	2	9	17	12	10	10	0	0	0	0	2	0	95	Outer membrane protein/protective antigen OMA87	atgtttattcgctatctttttagtcttgtcttactcctgtttttcttacctgaaatcgcttttgctgtatcactgtatgaccccattgatggaaagcttgatatgggtgaatacctagctgaaaacgcttacggttttctgcctatgccaatgatcataacagagcctgctgttggctacggcattggcttcaatgccctgttcttacacgaatctgaacagaaaaaggaaaaaagaaaacgtctcgcaatgaagtctattaatggaggcgcccaactactcacaccaagcattagtttggtcggcggtttaaaaaccgacaacggcacatggatggcttatggagcacaccgccaagtctggggagatgataaaattcgctacctcatcgcaggcggt…	MFIRYLFSLVLLLFFLPEIAFAVSLYDPIDGKLDMGEYLAENAYGFLPMPMIITEPAVGYGIGFNALFLHESEQKKEKRKRLAMKSINGGAQLLTPSISLVGGLKTDNGTWMAYGAHRQVWGDDKIRYLIAGGYGNVNMNFYTPYSKNKNDRIELNMEGQGLIQNLQFRIKNSHFFIGLGQKFFSSDIKLANGAASTKLIGTHNIANLSPTISGLGFVGSYDTRNNVFNPTNGAEYKAEYIWYRDTIGSDYNYTSTEIIGSHYIPISSKWLLALRWQYNAVFANTLLPPPAYPDIHMRGIPRNRYQGSASSAVQAQINYNITPRWLIDTFGGIGSAAKKTGDLYSHNDHSAYGIGFRYLIARRYGINMGVDVAKSDDDQAIYLNLGTGW
357	MAG14_118	MAG14_118_357	1103	0	2	8	0	8	14	1	2	0	0	0	0	0	0	0	36	hypothetical protein	gtgagcggtttatttttagcaaaaaaatttaaattcagtgtatttatttactttatatgctccatgttattaacggcttcaataaatgcatctgtttttcaatgccctgattgtaataatgatcttgaaacagctagtttatcgtgcacagagtgcagttatatttatgacttagaagaaaaaataaagttattaaatcaagcattatataaaataaaagaaactgaaaaaatattacacttaccaccacaacaagatcaattaccgcgctctgataggcttagcgttttactagatgttaaagatgagttaccgccctctgcttactttagcgtttttctagatgttaaggataaaccaaaaacaataaagaatattagagagcaaataacattactg…	MSGLFLAKKFKFSVFIYFICSMLLTASINASVFQCPDCNNDLETASLSCTECSYIYDLEEKIKLLNQALYKIKETEKILHLPPQQDQLPRSDRLSVLLDVKDELPPSAYFSVFLDVKDKPKTIKNIREQITLLKKFHQRNVDTIERYCQEKQIPIGHNLANHVSILVEQILTSIVKYSSNENPHQNTRILFPYSTLNGLILFATNHYYNQARETKNKNIDDWLSFVVALFLTIIGAHNDLRQPFKDNIDSTSFANVKTFLANLRSSLSYSASSLSLSDLPFEPTYTLRPKTRDLPEMIKVVKSNNDDRYTLLFSSGYILEDLSDQQVFQLLSVFEPYYLGVKDMLKTLMATTGLVLAGYTLWRAVSH
358	MAG14_118	MAG14_118_358	1787	4	4	10	22	4	26	6	32	4	2	0	0	0	10	0	124	Efflux ABC transporter for glutathione/L-cysteine, essential for assembly of bd-type respiratory oxidases => CydD subunit	atgagcagtacccaagaattcccgcctgaaaagcaggcatatcgttggttaatgagccgggcagtttcagctagaaagtggttgatagcatccattgtattagggttgtgtagtggtgttttattactaatccaagcctattttttggccgatattgtccataaattggtcatagggtctgcggtgcgccagcaacttactgcatcatttgtagcatcgtttgttgttgtggtggcaagagcagcatgttttatgggcagggagcgatgtggttttcgtgcaggtggacaggtacgtaccgaaatccgaacagcactgctagataaattacaacgactaggccccctagctactgcccagcatacagccggtggtttaacaatgattgttgttgaacaa…	MSSTQEFPPEKQAYRWLMSRAVSARKWLIASIVLGLCSGVLLLIQAYFLADIVHKLVIGSAVRQQLTASFVASFVVVVARAACFMGRERCGFRAGGQVRTEIRTALLDKLQRLGPLATAQHTAGGLTMIVVEQVEELHEFIARYIPQMALAVLIPIVMLIIVFPMNWMVGLIFFSTAPLIPFFMALVGLKAAEANRKNFKALKQLGGFFLDRLHGMETLRLFRQGQRAQQGLSEASNDFREKTMGVLKLAFLSSTVLEFFASIAIALTAMYLGMSFLGYIHFGAYGHGVSLFTAMFLLLLAPEFYQPLRELGTHYHAKAKAVAAAESILDIINQPEPEEHKGDLCFKARGAIAIDAKGLTVKAPQTEQPLLKRLDFSVQPGSRVAIVGPSGAGKTTLVN…
359	MAG14_118	MAG14_118_359	1700	1	2	9	0	6	6	7	13	6	0	0	0	2	6	0	58	Efflux ABC transporter for glutathione/L-cysteine, essential for assembly of bd-type respiratory oxidases => CydC subunit	atgcgtgatttatggctattttttaagctctatagtcgccataaaggcatgttgaccttgggtgtgctgttggcactgattacactgattgccagtttagggttattaacactatccggttggtttataacagcaacgtccctagcaggattagctacagcaacagccaagctgtttaatttttttactcctgcctcgggtgttcgtggattctctattttaagaacagccagtcgttatggcgaacgacttattagtcatgatgcaacctttcgtttattggcttggttgagagaatggtttttcagcaaattattacccttatcattagataaagcaggctgttaccgcaaaggtgacctgcttaaccgagtagtgacggatgttgatacgctagat…	MRDLWLFFKLYSRHKGMLTLGVLLALITLIASLGLLTLSGWFITATSLAGLATATAKLFNFFTPASGVRGFSILRTASRYGERLISHDATFRLLAWLREWFFSKLLPLSLDKAGCYRKGDLLNRVVTDVDTLDQLYLRLLSPLLSALFLSLILAIFLSFFSVPLALFSLVVMWVWISCMPLLFFNLGDKVGRSLGEKQRDFRQQALDHLQGMAEGLVFGYYTKSRRVLQNTEAKLQADQHSMANIEGLGSFLFVAGSGIAALGMLWLASGELQLKHISGPVMAMMVFAMLAGFEALMPLPAAFQFLSHTRQAARRLREVVDENPIEFVSIDDDFTVKGGICFSDVSFAYETKNKGGCSTVNNLYLDIAAGQHIALLGKTGCGKSTLIRLINRGLSPSQG…
360	MAG14_118	MAG14_118_360	977	24	22	61	8	18	52	31	35	6	3	0	0	0	8	0	268	Octaprenyl diphosphate synthase (EC 2.5.1.90)	atgccagacagaaaaccacctgtttttcaaactgttgtacacgaagatttccagctggttaatcagtgtatcctcgaacaactgcactccaatgttgctctggtcaataagatcggccaatatatcattagttctggaggtaagcgtctgcgtccacttttggtactgctgacagcccgagcctgtggttaccaagcgtatcaacatatctctatggcagcaattatagaattccttcataccgctactttgctgcatgatgacgtggtcgatcagtctaatttacgtaggggaaggggcacagccaatgccatttggggtaatgctcccagcgtattagtcggtgattttttatactctcgtgcctttcagatgatggtaagtatgggaaagataccg…	MPDRKPPVFQTVVHEDFQLVNQCILEQLHSNVALVNKIGQYIISSGGKRLRPLLVLLTARACGYQAYQHISMAAIIEFLHTATLLHDDVVDQSNLRRGRGTANAIWGNAPSVLVGDFLYSRAFQMMVSMGKIPLLNILADATNVIAEGEVMQLMNIHDANVTEANYMDVIRCKTAMLFEASTHTAAIVSGVDSVTEQALKHYGNFLGTAFQLVDDVLDYNGNSDTMGKNLGDDLAEGKPTLPLIYTMAHGLPEQQAIIKQAIQQGDRNSIDSVIASVRDCGALNYTMDKARGFVEQAINCLSVLPESKYRDAMIDLASFAVERVI
361	MAG14_118	MAG14_118_361	302	68	62	169	30	55	91	61	136	61	5	0	0	0	29	1	782	Cold shock protein of CSP family => CspD (naming convention as in E.coli)	atgggagcgaccaagaaggaaatggaagctatgctggtaggtacagtgaagtggtttaataaccccaaggggtatggattcatacaagctcaagaagccactgataatcaagatgttctgatacattactcagtaattgaaatggaagggtttaaaacgctgaaggctggtcagttggttagttttgagattggccaaggccctaaaggattgattgccactaaagtgttgccagataatggcagtaacggtgaaaatatacctcagtcaggtgcagaagatcaaaagaaagtccctgtctag	MGATKKEMEAMLVGTVKWFNNPKGYGFIQAQEATDNQDVLIHYSVIEMEGFKTLKAGQLVSFEIGQGPKGLIATKVLPDNGSNGENIPQSGAEDQKKVPV
362	MAG14_118	MAG14_118_362	551	6	4	25	6	2	18	4	14	10	0	0	0	2	6	0	97	hypothetical protein	ttgccagttacttctaactttcagcttgccattgccgctatcattctgttaatagctgccctttcagttgctctctggtttcggtatgtgttaaaaaaatcaacgctgtctcagcctgtttttacgccatctggcaggtctttttttggacaactgaatatggccgtgcgcagtcactgtgtcgtgtttcctagtatcccagttcgtttattgatacgggcaaaagtccttactcgaggcgggtttctactatctaagctaaagaatgatgtttttgactatgttatttgtgatcgagaaacgatggatgttaagtgccttatcattcttagtaataaatcacgaaaaacggcaaaaaaagcagatgaatttgttcagttgtgccgttatgccggccta…	MPVTSNFQLAIAAIILLIAALSVALWFRYVLKKSTLSQPVFTPSGRSFFGQLNMAVRSHCVVFPSIPVRLLIRAKVLTRGGFLLSKLKNDVFDYVICDRETMDVKCLIILSNKSRKTAKKADEFVQLCRYAGLTLLAYEEKPYRNIPALRKQIFTACSIKEPKICDNGKFECTATAHPESILS
363	MAG14_118	MAG14_118_363	125	2	0	0	0	1	1	2	1	0	0	0	0	0	0	0	7	hypothetical protein	atgtttttattaaaaaatttaattcgtatcaaggctattgaagctggctttggttgcaggcaggttggtaatctaatgagagattatgatggtagttatcaagatagaacgttgttatctatttga	MFLLKNLIRIKAIEAGFGCRQVGNLMRDYDGSYQDRTLLSI
364	MAG14_118	MAG14_118_364	485	14	4	44	6	4	30	20	18	20	0	0	0	0	4	0	164	hypothetical protein	gtgtcaggctatcgagaagacttttatataaaggataacattataggctataccggctttataatggactcaccaacggtttacttttataactcacactcatatgagtttgggcatattacacaaaatcacgtagtcaaaaagaatattggtaaagaattggtaagaagaggcagagattatatgatcttcaactgccatactggcgacccttgtagccatagtctatctattttaggcaacaggcctacaaacttcacaaaacaactattacgcgaaatcaacgcgctagcccgcaggagtattaataataccgctgtggaagtttaccgtggacaaattatacataaatccagaagtgcttttaagattgtaaaaagtaatgaagatgctaagcat…	MSGYREDFYIKDNIIGYTGFIMDSPTVYFYNSHSYEFGHITQNHVVKKNIGKELVRRGRDYMIFNCHTGDPCSHSLSILGNRPTNFTKQLLREINALARRSINNTAVEVYRGQIIHKSRSAFKIVKSNEDAKHLLFQSVAKYPNLKERFYKRISHVVGTSLR
365	MAG14_119	MAG14_119_365	116	0	0	0	0	0	0	0	1	0	0	0	0	0	0	0	1	hypothetical protein	atgagcgatttaacagagcggcacggctcatcaatggttatgataggtcaaggcaagaattccacaagcttatccacagaagctgtgggtaagcttccactgataatatgcttttaa	MSDLTERHGSSMVMIGQGKNSTSLSTEAVGKLPLIICF
366	MAG14_119	MAG14_119_366	689	4	2	21	4	3	3	4	9	4	0	0	0	0	2	0	56	hypothetical protein	atgatgatgttttgggcaatagcgtttcttttagtactgtttgcattggctttcgttattttgccgttattaaaaaataataataaacaggaatctaataactcaaatcagtcgcgcttaaatattaagttggctatgctattagccgccttggtgcccattgtggtgctgacgctttatagccagctgggggcacagaccgaactcaccatgacaagcaggctacatcaacccaactcaacaccggcacaacgtactcaggcgatggaacaatggctgcagcagcaccctgaagataccaacgtactctatgttttagctagcgagcatatatcagcccagcaatttgataaggcgcttaacatttatcgacgattatatcagttgacaggcaaacac…	MMMFWAIAFLLVLFALAFVILPLLKNNNKQESNNSNQSRLNIKLAMLLAALVPIVVLTLYSQLGAQTELTMTSRLHQPNSTPAQRTQAMEQWLQQHPEDTNVLYVLASEHISAQQFDKALNIYRRLYQLTGKHAHISAQLAQILFLTENQKVTDEVRRLYQESLVLDANNNTALGLKGIDAFEQTQYAEAVDAWQRAIQNEQDPYTRQALASGIIEAKRMLQKKPESIQ
367	MAG14_119	MAG14_119_367	455	8	0	8	2	2	4	4	8	2	0	0	0	0	2	0	40	Cytochrome c heme lyase subunit CcmL	atgagcttaaaaaatagtctgctcacccttttgatctggttgatatggcctccggtatttgctgtcattgatgtttatcggtttgataatgctgctcaagaacagcgtttttccttactaactcatcagctacgttgccctaagtgtcaaaatcagtctattgctgactcggatgcgcctatagcgaatgacttacgccaagccgtttatcagatgttattagccggtaaagataatcaaacaattattgattttatgctggctcgttatggtcagtttgtactttatcgcccgccgctggtcagtaaaacggttttgctttggatggggccatcagtatttttgttaattggcctatttattttatttttgattgtgcgaagacatcagcaggttgtt…	MSLKNSLLTLLIWLIWPPVFAVIDVYRFDNAAQEQRFSLLTHQLRCPKCQNQSIADSDAPIANDLRQAVYQMLLAGKDNQTIIDFMLARYGQFVLYRPPLVSKTVLLWMGPSVFLLIGLFILFLIVRRHQQVVESDADKKENAYHLPSKEE
368	MAG14_119	MAG14_119_368	548	4	2	8	2	6	0	5	7	10	0	0	0	0	0	0	44	Cytochrome c-type biogenesis protein CcmG/DsbE, thiol:disulfide oxidoreductase	atgaggcggtggcagctatttttacctttaatattgttttttggcttgtgcctattgttatacattggcctatttcgaagcgaaagagaccagctaccttcgcctctccttaatcaacccttacctgatttttctcttaatacggttcttaaacctaaccacagggttactgccaatgacctcaaaggtcatgttgctttaattaatgtatgggcaacatggtgtatcgcctgccgtgttgagcacccttatttaaatcaattggcacagcagggcattactatttatggaatcaactataaagatgatcagcctgctgctaagcagtggttaatacagctacataacccttatcgctttagtattaatgataatcaaggcaagttaggcatggatctt…	MRRWQLFLPLILFFGLCLLLYIGLFRSERDQLPSPLLNQPLPDFSLNTVLKPNHRVTANDLKGHVALINVWATWCIACRVEHPYLNQLAQQGITIYGINYKDDQPAAKQWLIQLHNPYRFSINDNQGKLGMDLGVYGAPETYLIDSDGIIRYKHIGIVDSNIWNTVLRPLYEALIQQKEGAL
369	MAG14_119	MAG14_119_369	1991	14	4	24	2	15	0	8	14	4	0	0	0	0	4	0	89	Cytochrome c heme lyase subunit CcmF	atggtgcctgaactgggcttgttcctgcttattttagcattgtgtctcgctgttaccttgtttttcatacctctaaccggtagctataccggtaatataaactggatgcagcaagctcgcccactggtttatgggcaatttttactcatactaagtgcttttggctgcttaatagcatcgtttgtaggtgatgatttttcagttgcttacgtagcaaatcatgcgaatagcctattgccacttcaatacaaaattagtgctacgtggggcggtcatgaaggttcgctattgctatgggtattaatactagcaggatggatggccgccatagcattaagtagtcgtcgtttacctcttgttttttcggctcgggtactctccattatgggtatgatttca…	MVPELGLFLLILALCLAVTLFFIPLTGSYTGNINWMQQARPLVYGQFLLILSAFGCLIASFVGDDFSVAYVANHANSLLPLQYKISATWGGHEGSLLLWVLILAGWMAAIALSSRRLPLVFSARVLSIMGMISAGFLLFMLFTSNPFARVLPFPPADGADLNPLLQDIGLIVHPPILYMGYVGFSVAFAFAIAALLGSELNSAWARWVRPWTTVAWGFLTLGIALGSWWAYYELGWGGWWFWDPVENASLVPWLVGTALIHSLAVTEKRGLFKSWTLLLAIFAFSLSLLGTFLVRSGILTSVHAFANDPERGVFILIYLLFIVGCSLTLFAFKAPTVSTSIRFAWLSKETLLLLNNILLIVSASTVLLGTLFPLLLESLDRGMISVGPPYFNAFFVPIA…
370	MAG14_119	MAG14_119_370	467	1	2	7	0	2	0	4	5	5	2	0	0	2	0	0	30	Cytochrome c-type biogenesis protein CcmE, heme chaperone	atgaatccagcaagaaagcaacgattaattttaattgtcgtgttgctgttaggcttaagcctggctgtaacacttgctttagtagcacttgaacagaatattaaccattatttttctcccagccagatggctaagggtgaagctcctgtgggaaaaaaaataagaggtggtggccttgttgtttatgattcggttatcagggctaacaatagcctagcagtgagttttgttattacagatggcgctaaaaacgttactgttatgtacgatggcatcctacccaatttgtttaaagagggacagggggttgtagcattaggtcaactgaataaggaagggatatttattgccaaggaagtgcttgctaagcatgatgaaacctatatgccgcctgaggtt…	MNPARKQRLILIVVLLLGLSLAVTLALVALEQNINHYFSPSQMAKGEAPVGKKIRGGGLVVYDSVIRANNSLAVSFVITDGAKNVTVMYDGILPNLFKEGQGVVALGQLNKEGIFIAKEVLAKHDETYMPPEVQQAIDNAQIDFAPNSGAYTDGA
371	MAG14_119	MAG14_119_371	251	0	0	7	0	0	0	0	1	1	0	0	0	0	0	0	10	hypothetical protein	atgtattttaataatttttcagatttgattgccatggatggccacggtttttatgtttggttcgcttatgcttttgcttttgcagtacttatttacaacctaatagtacctgcgctgtcttacagaagaattatgcaaaaattgcgaagacaaaaaaaaatagaacaacaacggcgggtcaatcggtgctatatactgccatccgctaggttgtcctctcaagaaactgaaaaggagagggtagggccatga	MYFNNFSDLIAMDGHGFYVWFAYAFAFAVLIYNLIVPALSYRRIMQKLRRQKKIEQQRRVNRCYILPSARLSSQETEKERVGP
372	MAG14_119	MAG14_119_372	731	4	0	9	0	1	0	2	1	4	0	0	0	0	0	0	30	Cytochrome c-type biogenesis protein CcmC, putative heme lyase for CcmE	atgcgttggacattgttttataaattaggctcgccaaagtggttttacgatataagtggtaaatgggtaccctttttatcagttataacagcggccgtattgctacccgctttgatttgggggcttgcttttgcaccagaagattatcttcagggaaacagttaccggattatttttattcacgtaccgtctgcgtttttggcacaagctgtttatatgatgatggcagttgctgcagttattcatttagtttggaaaatgaagatggctgatattgcattgactgtactcgtacctattggtgcatcttttactatgttagcgctggttagtggagcaatttggggtaagccaacatggggaacatggtggcaatgggatgcacgattgacatcaatg…	MRWTLFYKLGSPKWFYDISGKWVPFLSVITAAVLLPALIWGLAFAPEDYLQGNSYRIIFIHVPSAFLAQAVYMMMAVAAVIHLVWKMKMADIALTVLVPIGASFTMLALVSGAIWGKPTWGTWWQWDARLTSMLILFFLYIGLFALRNALQNHHAERACAVLTLVGVVNIPIIKFSVQWWNTLHQGTTLTLTEKPSMAIDMLIPLLLSIAGFYLFLFLVTIQRLRVEILVRERKTVWVSRLIS
373	MAG14_119	MAG14_119_373	659	4	2	6	2	0	0	4	5	6	0	0	0	0	0	0	29	ABC transporter involved in cytochrome c biogenesis, CcmB subunit	gtgtttaatgcgctaataaaacgggagatgacgctttcttttcgtaagtctgggcagattattaatccattgatgtttttattaatagtgacatctttgtttccattaggtattacgccagaaggttatatattagaaaaaatagcaggtggtttgatctgggtgacagcgttgctggccgttttattatcgcttgattcactatttaacagtgattataacgacggtacgctggaacaattgttattatcaccttatccacttccgctgcttgtcttggcaaaagtgctatcgcactggtttcgcacgggtttgctcatcactcttatctcgccattgttggggcttatgttgcacttgcattctcatggaattcaagccttgttgctttccttgcta…	MFNALIKREMTLSFRKSGQIINPLMFLLIVTSLFPLGITPEGYILEKIAGGLIWVTALLAVLLSLDSLFNSDYNDGTLEQLLLSPYPLPLLVLAKVLSHWFRTGLLITLISPLLGLMLHLHSHGIQALLLSLLLGTPLLSLVGAISAALTIGIHQTSVLMTLISLPFYIPILIFGTGSIRAATQDLPYQGHLLWLAVFLVLGICLAPLAIAGALKGRID
374	MAG14_119	MAG14_119_374	686	24	13	62	2	6	9	9	11	10	0	0	0	0	2	0	151	ABC transporter involved in cytochrome c biogenesis, ATPase component CcmA	ttgctcaagatagtaagtttagggtgcgagcgagatgatagcgtgctttttgaaaaggtatcttttcttttgtctcctggagacaccctacatatacaagggcacaatggtgtaggtaaaacgacactattgcgaagtattgcagggctttttcataattatcaaggggatattttctgggctgaccgtctattacaaaaaaattatgtagatttttgccttaatagctacttcctaggtcatcggcccgccttaaaaggtgagctaacgcccactgaaaacatgcgtttaagtcatcaactatcgggtcgttctttagctattaaaatagaagatgcgcttgatcaagctaatctcaggggctatgaacatacgccgtgttatcagttatcttctggg…	MLKIVSLGCERDDSVLFEKVSFLLSPGDTLHIQGHNGVGKTTLLRSIAGLFHNYQGDIFWADRLLQKNYVDFCLNSYFLGHRPALKGELTPTENMRLSHQLSGRSLAIKIEDALDQANLRGYEHTPCYQLSSGQRQRVSLSGLLMSNACLWILDEPFTAIDADGVQWVEGLIEAHAQQGGMTIVTSHQPLSNGITYVKILELERNINPQYGFYNQHKNRRELAHYEML
375	MAG14_119	MAG14_119_375	2021	24	12	72	20	32	79	24	71	14	2	0	0	2	18	0	426	hypothetical protein	atggataggatgactcgattacaatcatcacttaatatctttgaaaacaatcaggtattccagacaccctctttatttgcagattactctgtatcggcaacggatcgatactacacacatccaaggtatagatcatataccagaaatcaacagcctagacaggcttacttatcagcaagaaacgttaatcaaacgaatcctactcattttgtcagcgaagtcacatctgatattaatcgcgcatcacgtagcaagccagataatacaccatctagtaacgttgatgttgattatgatgtacttcacaacctcactagtgaccagcataagtgtgactataacgaaagtacgccgcttagcgatactaagatttccatttccgatcttacccaagagcaa…	MDRMTRLQSSLNIFENNQVFQTPSLFADYSVSATDRYYTHPRYRSYTRNQQPRQAYLSARNVNQTNPTHFVSEVTSDINRASRSKPDNTPSSNVDVDYDVLHNLTSDQHKCDYNESTPLSDTKISISDLTQEQQQRFWSWLYDDEKTYFYSDSKVVKWLQTRSEPEQASAGATALVNDHNVANEKTVTETRSGSMLENTQLSDANISISDITGEQQQTSSESEQTNAGATALVNDHNVPNETTVTEARSSSMLENTPPSDTKISISDLTQEQQQRFWSWLYDDEKTYFYSDSKVVKWLQTRSEPEQASADATALVNDHNVPNENTVTETRSNSTLENLLRRGTNDISAFYLTDEQQKPVSESEQANKSENQSIKIKTEIKSNLNKFIAAFERSKNVSLN…
376	MAG14_119	MAG14_119_376	386	5	0	5	2	1	11	8	12	2	0	0	0	0	0	0	46	Fluoride ion transporter CrcB	atgctgaactatatcgctgtcgccataggcggtgcgttaggtgccctgctacgttctatcgtttatgagtattttgctgaaaccggtaatgtacatttatttcctttacccactcttattgtcaatattgtgggctctattttaatgggtattggctggttttgtttgatagagcagagcatgttgcctgctatctggaaaaattttgcattgacaggcatgctgggtgcgctcacaaccttctctaccttttctcttgactccttccggctattacaatcaggtcagcttctggaagcgctggcttatgtactaatcagtgtgacggtgtgttttttagggctatggcttggttaccaaacggtaaaatggctggttggagcctag	MLNYIAVAIGGALGALLRSIVYEYFAETGNVHLFPLPTLIVNIVGSILMGIGWFCLIEQSMLPAIWKNFALTGMLGALTTFSTFSLDSFRLLQSGQLLEALAYVLISVTVCFLGLWLGYQTVKWLVGA
377	MAG14_119	MAG14_119_377	134	0	0	0	1	0	0	2	7	0	0	0	0	0	2	0	13	hypothetical protein	ttgaagggtgctaaaaaaacaccaaaaaatcaagcatcttcagggttgatgggcataataccaaacatcttttctaacactgactatcccgttttatgcgggacttcagctgcccatgcttattatggtagttag	MKGAKKTPKNQASSGLMGIIPNIFSNTDYPVLCGTSAAHAYYGS
378	MAG14_119	MAG14_119_378	1280	10	14	38	11	26	28	56	88	24	0	0	0	0	18	0	315	Seryl-tRNA synthetase (EC 6.1.1.11)	atgctggatccaaagtacgtcagaacgaacccggaaacgattgctaagcatctgaaaaaaaaacattattcattagatttagcgaccctaaagtcattggaagaccgccgaaaatctttacagatgaacacagagcaattgcaaaatgagcggaaaaccggttcaaaggcatttggtaagctcaaagctcaaggtgaagatattgcgccatttaaagcaaaaatggatcgcatcaacagtgaattaaaagcatctgaaattgagctgaatgcagtgcagaataagctgagccatctgctggcaggtatccctaacctgccagatgcctctgtacctgaagggaaagatgaagccgataatgtggaagtgcgtacatggggcaaccctgcatcgttagcc…	MLDPKYVRTNPETIAKHLKKKHYSLDLATLKSLEDRRKSLQMNTEQLQNERKTGSKAFGKLKAQGEDIAPFKAKMDRINSELKASEIELNAVQNKLSHLLAGIPNLPDASVPEGKDEADNVEVRTWGNPASLAFTAKDHVELGAPLGLDFDTAAKLSGSRFALLRGSMARLHRALAQFMLDVQVDEHGYEEVNTPYLVYDQILQGTGQLPKFSEDQFKTDCEDGGKPFYLIPTAEVTLTNTVREQIIASTDLPIRLTAHSACFRKEAGSYGRDTRGMIRQHQFEKVEMVQIVHPEQSFEVLEAMTGHAEAILQKLKLPYRVVALCGGDLGFSAAKTYDLEVWLPGQQKFREISSVSNCLDFQARRMHARFRHPETGKLELVHTLNGSGLAVGRTLVAVL…
379	MAG14_119	MAG14_119_379	125	0	2	0	0	0	0	4	6	0	0	0	0	2	2	0	32	hypothetical protein	atgcgtaatagcagggtattgcgaagcattccaactcagcgctggtgtttgaataatcagcgcaatagcatgatgaagccatttaattggtatcaggtgcccatatttttaatgggcttaaaatag	MRNSRVLRSIPTQRWCLNNQRNSMMKPFNWYQVPIFLMGLK
380	MAG14_12	MAG14_12_380	320	2	2	4	2	4	3	2	13	4	0	0	0	0	0	0	36	Insertion element IS407 (Burkholderia multivorans) transposase	atgaagaaccgctactcagaagaacaaatcatacgtgccattaaacagcatgaagctggggtaaaggtcgatgatatttgtcgagagatgggcatatcgtccagaaccttttacacttggtgttctaaatacgcagggcttgaggtaaacgaagcaaaacgacttcgtgagcttgagtcggagaattccaagttaaaacgactcttcgcagacaaactacttgaagtagaagcgatccagtcagccgttgatggtcatcacctccacggctccctgctaatcgaacgaattgaaaagaacttctgcgcacaccccatatag	MKNRYSEEQIIRAIKQHEAGVKVDDICREMGISSRTFYTWCSKYAGLEVNEAKRLRELESENSKLKRLFADKLLEVEAIQSAVDGHHLHGSLLIERIEKNFCAHPI
381	MAG14_12	MAG14_12_381	236	4	10	5	4	7	7	3	30	4	0	0	0	0	2	0	76	hypothetical protein	atgaaaaaagatgttgaagaagattttgaaaacataccgagctctcggatgaagagaatactcgaactaatattcggtctatggtacatgaccctccccccgatacctgtatttattgggagtatgatattttgttggcctttcggaatcgatgttgctctagggatatcgttgtttttagctgctttcatttttatcatttgtgcagccctacctatgctgttaatcgacttttga	MKKDVEEDFENIPSSRMKRILELIFGLWYMTLPPIPVFIGSMIFCWPFGIDVALGISLFLAAFIFIICAALPMLLIDF
382	MAG14_12	MAG14_12_382	2288	62	36	140	36	33	77	55	146	31	0	0	0	2	28	0	724	FIG001592: Phosphocarrier protein kinase/phosphorylase, nitrogen regulation associated	atgatgttgagtactctgcgtacaattgttcaggaagttagctctgcaaaggggttgcaggcggctttacgaactattgtacagcgagcgaaagcggctatgcacactgaagtgtgttctatatttctgtataatcaggaaacctctcgctacacactaatggcttcggaagggcttaaccccgatgcggttggtagggtttctttgtcttactcagaaggtcttgttggccaagttggtttaaaagaagagcctattaaccttgatgatgctccttcacatccaaaatactgttatgttaaagaaacaggagaagaacggtatcgtgcctttttaggtgtacccattattcatcaacggaaaattctaggtgttatggttgttcaacaatcagcatca…	MMLSTLRTIVQEVSSAKGLQAALRTIVQRAKAAMHTEVCSIFLYNQETSRYTLMASEGLNPDAVGRVSLSYSEGLVGQVGLKEEPINLDDAPSHPKYCYVKETGEERYRAFLGVPIIHQRKILGVMVVQQSASRHFNEHEEAFLVTMSAQLAGVIAHAEATGSLEPSLYFPRKINRFQGTSGASGVAIGHAVVLAPLTEANTPPDKNCDNIDKELAYLERAIAGVKADLHEMASKLADRLPSEELALFDVYLRILDDNALGHEIRKRVSKGVWAQNALRQVIGNYVSQFEDMEDPYLRERAVDVKDLGRRVLSYLQESKQADIYYPEATILISEELAPAMLGEVPHDRLAGLISLRGSGNSHVAILAKTLGIPTVMGAVDLPFRQLSGKQLIVDGNLGL…
383	MAG14_12	MAG14_12_383	491	60	44	121	30	23	95	36	78	27	0	0	0	4	13	0	531	Adenosine (5')-pentaphospho-(5'')-adenosine pyrophosphohydrolase	gtgattgattcagatggatttaggcctaatgtaggcatcattctggcaaatcacatcggacaggttttatgggcaaggcgaattaggcaagatgcatggcagttccctcaaggagggataaatgatgatgaaacaccagaacaggcaatgtacagagagctctatgaagaaatagggttagcgccagagagtattgaaattctggcatgtactcgtggctggttacgctatcgtttgccaaggcgtttaattcgcagagaacagcagccgctgtgtattggtcaaaagcagaaatggtttctgttaaacctgttgagttgtgatgatgctatacgtgtagatcataccccttcaccagagtttgaccactggcgctgggttagttactggtatccccta…	MIDSDGFRPNVGIILANHIGQVLWARRIRQDAWQFPQGGINDDETPEQAMYRELYEEIGLAPESIEILACTRGWLRYRLPRRLIRREQQPLCIGQKQKWFLLNLLSCDDAIRVDHTPSPEFDHWRWVSYWYPLGQVVSFKREVYRRALRELVPHIGWLQAQDC
384	MAG14_12	MAG14_12_384	242	2	1	3	1	2	4	2	6	0	2	0	0	2	0	0	37	hypothetical protein	atgtctgcctatatcatctctgctaaagaaaatgaaacacaaatactcattactattcgacacggacagtctttgcctgcatttaaagaacaacttcagcatgagctgcactacgccaaaaaactagttataaaacaacagcttgagcgactatatgaagaaaaatccaaaaagcaacaaccaaaaacctgtagatcactctgggtgtctagtgcgggtcgggcaatacgggtaccaaagtaa	MSAYIISAKENETQILITIRHGQSLPAFKEQLQHELHYAKKLVIKQQLERLYEEKSKKQQPKTCRSLWVSSAGRAIRVPK
385	MAG14_12	MAG14_12_385	122	0	0	5	0	2	6	0	0	2	0	0	0	0	0	0	15	hypothetical protein	gtgccagaacagatcgttgagataaccatgcatggctctggcgtgcgtgatattagccgagtactcaaaataagcctgactacagtagtcacttatttaaaaaactttcccctccgcaaataa	MPEQIVEITMHGSGVRDISRVLKISLTTVVTYLKNFPLRK
386	MAG14_12	MAG14_12_386	110	0	0	0	0	0	0	0	1	0	0	0	0	0	0	0	1	hypothetical protein	cttcaaggcagtattaaatatcatgcaaattctcagattaacaaatttttagtacatcttcttattcattcaattattggtgatacattatatacattgagccccgattga	LQGSIKYHANSQINKFLVHLLIHSIIGDTLYTLSPD
387	MAG14_120	MAG14_120_387	1373	2	0	4	0	2	0	3	4	0	0	0	0	0	0	0	15	hypothetical protein	atgcgatgtaaacgacatattgctttatatattctcctattgctaaaaatattttttatagtgccttcagctcatgcttctctttttgaagaagcagcagatgagattaagatgcaactatctaacgatcaatcagacgttaaaacaaagatagagcatgttgttaattggtataaacgaaaggtagctgttttagaagacgatatttccttagcaaatactaaaactttactgaaaacggatgattttcctttaaatggcatggcttttgccactctagctagcattttaaatcactctttagaggaatcaaactgtgcatccacaagctttaatgaattagtagctctatgtaaagagagagcgagtcaagcaggcatatctgatatttctcgctat…	MRCKRHIALYILLLLKIFFIVPSAHASLFEEAADEIKMQLSNDQSDVKTKIEHVVNWYKRKVAVLEDDISLANTKTLLKTDDFPLNGMAFATLASILNHSLEESNCASTSFNELVALCKERASQAGISDISRYQAEDTSEEGETNKAKMLFHIPEGGTIYGHKESIADANISAYFADFDKLCGKNQILCKVEMCGESLDSRIKIAPYELINTFKNAFGDTNFAAKCIVPALNWCIENYHKPEKKLILPNLYKTNTLLSIYPKNRQKKIEKSAQEFLEGRYNFLKIASNKGISHDRWMNRYLFAIQVYEASIKLPFICIKAQVLSKRISLYRNFCQIKENTLPENTALYVFQLNETSQHVLPSEELTQMSDACSYFFEARDRTLNIRDSTVYGCIGDFSI…
388	MAG14_120	MAG14_120_388	482	0	0	0	0	0	3	0	0	2	0	0	0	0	2	0	7	hypothetical protein	atgcgagctagccctgtcaatgcttctaacatcatcgttagtgatgccaaagcatcagtagtacacaataaggacgttgtattttataagggccttattgctatgaaaaagtatagtttttcaaatatacctcgttatcatgacctaaaaaaatgtatttgcaacattacctgcaatagcagtattgaagagcatatctcacttgagctagccatcagcagcaataaccatatatcagaagaagaaaaggttattttgctgtcgtctctttttattgtatcgcttaacaaagctagctacgaccctgattatattgtatgccgactgaaccatttggttattgctcctaccaccaagaaaaaactcattgcgtttatatatcctgaagttgagaagctt…	MRASPVNASNIIVSDAKASVVHNKDVVFYKGLIAMKKYSFSNIPRYHDLKKCICNITCNSSIEEHISLELAISSNNHISEEEKVILLSSLFIVSLNKASYDPDYIVCRLNHLVIAPTTKKKLIAFIYPEVEKLRFSPQKTISEENPLALFKTKSVITYRR
389	MAG14_120	MAG14_120_389	1772	2	2	13	6	6	4	12	22	11	0	0	0	4	2	0	88	ATP-dependent RNA helicase YejH	atgagttacacacttcgaccctatcaaaagcaagccgttacctctgttattgagcattttagaaaatccattgagccggctatcgccgttttaccgacaggctctggaaaaagtcttattatcagcgagctcgctagggtagccactgggcgagtgcttgttctagctcatgtaaaagaacttgttcagcaaaaccatgaaaaatatgaaagctatggtttaaaagcctcggtatttagtgcaggccttggcagaaaagaatcatcaaaacaggtggtttttggcagtatacagtcagtgtgtaagcatttggacagtttctctgataaagggtttacactgctaattattgatgaatgccatcgagttgctttagagaagagttcatcttatcacata…	MSYTLRPYQKQAVTSVIEHFRKSIEPAIAVLPTGSGKSLIISELARVATGRVLVLAHVKELVQQNHEKYESYGLKASVFSAGLGRKESSKQVVFGSIQSVCKHLDSFSDKGFTLLIIDECHRVALEKSSSYHITINHLQNLNTDLKILGLTATPYRLGMGWLYQYHKTNNQPHSIRTHDMRFFKDCIFEISLSDMIKNNFLTAPKLFDAPIACYDFSALTTGNFEQYQENDLNRLLQGEGRVTKKIIAQVVNKAKKRQGVMIFASTVDHAKEIFSYLPEGQAGLVVGETHIKDRNKIIEQFKTQQLKYLVNVSILTTGFDVPHVDLIAILRPTESISLYQQIVGRGLRLAPNKKECLIMEFSGNRYSLFSPEVGEPKPNSKAVPVSVDCPACHFSNTFW…
390	MAG14_120	MAG14_120_390	1319	8	6	4	0	2	8	4	4	1	0	0	0	0	0	0	40	Periplasmic space glucose-6-phosphate sensor protein UhpC	atgctcgggatttttaaatcacctcaagaaatacctgtaattaatgatcctcaggttatcaatcagcgctataagtattggcggctgcatatcatgatgacgatgtatgttggctatgcggcattttattttactcgcaagagttttaattttaccatgccagctatgattgctgagctgggcatggaaaaagctgatataggcatcttatcaacactgttctatatcatatatggctgctcaaaatttctatcaggcattatcagtgaccggtcaaatcctcgtttttttatgggtataggcctaattgctactggtatcattaatatcttttttggtttgtcctcatcactactggctttctccctgctatggagtcttaatgcattttttcagggg…	MLGIFKSPQEIPVINDPQVINQRYKYWRLHIMMTMYVGYAAFYFTRKSFNFTMPAMIAELGMEKADIGILSTLFYIIYGCSKFLSGIISDRSNPRFFMGIGLIATGIINIFFGLSSSLLAFSLLWSLNAFFQGWGWPPCSKLLNFWYSRSERGAWWAVWNTAHNLGGALIPLLAGFCALHFGWRYGLIVPGMLAIVIGLFLCVRLRDKPSTMGLPSIGQWRKDALEQVHEQDASGLSTRDILLQYILKSRMLWLLALASILVYVVRTAINDWGNLYLTEVHNYNLVSANSAATFFEIGGFLGSLVAGWGSDRFFRGNRGPMNIIFSVGVLASSITLWLITSSSYLLQGSCFFLLGFFIFGPQLLLGMAAAEHSHKEASGAATGFIGLFSYIGAALAGYP…
391	MAG14_120	MAG14_120_391	122	2	0	0	0	0	0	1	1	0	0	0	0	0	0	0	4	hypothetical protein	gtgagccgagaggctgcccagcagaacatgctgaaaaacaagccagatcgaaacgatggccgcattgagttttcaccactacaggcgccaccttacgaccatgaaaataggcataacaaatag	MSREAAQQNMLKNKPDRNDGRIEFSPLQAPPYDHENRHNK
392	MAG14_120	MAG14_120_392	758	1	0	6	1	0	3	4	1	0	2	0	0	0	2	0	20	hypothetical protein	atgtgtcggcaaaacccgatgccggttacggaggtggctaccggtgaatctctcccagacggtttctttcctgataatgcgtttttcgatgcctgtttgtcagggaacctgttggtggtgcgggagtatctgtctgctggcgccaacgtcaatgctgcgcaggagaatggctggactgccctaatgtccgcagcacaggagggcaaaacagaagtcgttaagcttctgatcgagaatggcgccaacgtcaatgctgcgcaggagaatggcgcgactgccctaatatccgcagcacaggagggcaaaacagaggtcgctgatcttctgatcaagagtggcgccaacgtccatgcctgcctaagcaatgccgggacggataatggctggactgccctaatg…	MCRQNPMPVTEVATGESLPDGFFPDNAFFDACLSGNLLVVREYLSAGANVNAAQENGWTALMSAAQEGKTEVVKLLIENGANVNAAQENGATALISAAQEGKTEVADLLIKSGANVHACLSNAGTDNGWTALMAAAQQGKTEVVKLLINNGAKIDAAKENGWTALMAAAQEGKTEVVKLLINNDAKVNACVSNAGGFNGWTALMSAAQNGHKEIVELLLARGGCAGAKTATGDIALFLAGKGNHWNVVRMLI
393	MAG14_120	MAG14_120_393	206	0	0	0	1	2	0	0	0	0	0	0	0	0	0	0	3	Mobile element protein	atgctgttagagcgaggtgttgaagttgatcatacgaccatttatcgctgggcccagaagtatgcacctgagttggagaaacgactatgttggcattaccgcaagccttgctcatggtgcagctcggggctagatgaaacatacattaagattgctgaaaatggtgttatctttatcgtgcaattgataaatatagtaatacactaa	MLLERGVEVDHTTIYRWAQKYAPELEKRLCWHYRKPCSWCSSGLDETYIKIAENGVIFIVQLINIVIH
394	MAG14_120	MAG14_120_394	122	0	0	1	0	0	0	0	0	0	0	0	0	0	0	0	1	hypothetical protein	gtgctaatcggcgtgcgtgatattagccaattactcaagataagcctgactacagtagtcactcatttaaaaaactgtccctttcctcctgaagttatcctttgggcagttcgctggtattga	MLIGVRDISQLLKISLTTVVTHLKNCPFPPEVILWAVRWY
395	MAG14_120	MAG14_120_395	1220	8	6	8	8	7	53	25	58	21	0	0	0	0	8	0	202	Imidazolonepropionase (EC 3.5.2.7)	atgaagcagcctgctggtaaaataatccatcacatcaatattgccactatggacccagacaaccgattgccctacggaacaatacatactggggctattgttattagcgatgacactatcatatgggtgggcaaagagcaggaagttcctaactgttatgcatcctatgaaaagattgacggcaacaatcaatggcttacgcctggattaattgattgtcatacacatcttgtttttgcgggtaatagggcacaggagtttgagcaacgattgcaaggcgtttcttatgaaaagatagctagccaaggtggcggcatacagtctacagtccgcgctacacgccaagcttcagaagaaacgttatataacttatcagcgagtcgtttatttccatttctt…	MKQPAGKIIHHINIATMDPDNRLPYGTIHTGAIVISDDTIIWVGKEQEVPNCYASYEKIDGNNQWLTPGLIDCHTHLVFAGNRAQEFEQRLQGVSYEKIASQGGGIQSTVRATRQASEETLYNLSASRLFPFLAEGVTTMEIKSGYGLNLETECRQLRVARLLGENLPITIKTTFLGAHTLPEEFYGHSDDYIEHICNDMIPTIASAGLADAIDAFCERIAFSYEQVQQVFEAAKKYRLPVKIHAEQLSNLHGSVLSAKYQGLSADHLEHLDQIGINAMKSAGTVATLLPGAFYNLRETVIPPVTQLREAGVPIAIASDFNPGSSPLASLRLMMHMACTLFRLTPEEALLGCTRNAAMALGLSQMGVIREGYKADLVLWPIEHPAELVCHFGTPSPSQI…
396	MAG14_120	MAG14_120_396	977	8	2	4	6	16	23	32	38	28	0	0	0	0	0	0	157	Formiminoglutamase (EC 3.5.3.8)	atgtatcaaccgccagatatcaatctatggacaggccgcttagattctgaagaaggaaacgcaggtattcgttggcatcagcatattcagttattagatatgcataatatggacatgccaaaagaaggcgctgtcattattggattttgttctgatgaaggcgttagtcgcaacaaaggacgcatcggtgcaaagaaagggccccagcatattcgccggtcacttgcaggattagcttggcacaaaaatgacttggcgttatttgatgcaggcgatattctctgccaagaccaaaaccttgaagttgcccagagcgccttaaccgaacggctcactagacttttagatagtgcattatttcctatcgtcttaggaggggggcatgaaatagcactagcg…	MYQPPDINLWTGRLDSEEGNAGIRWHQHIQLLDMHNMDMPKEGAVIIGFCSDEGVSRNKGRIGAKKGPQHIRRSLAGLAWHKNDLALFDAGDILCQDQNLEVAQSALTERLTRLLDSALFPIVLGGGHEIALASGNAVYLCANKRKAVTGIINFDAHFDLRRPSPLGSSGTPFYQLNQTCLTKNQDFHYLCMGVAETANTQALFQRADKLGVKWVMDSDIHWANLSANLATIDAFMALCDVIYLTIDLDVLPAATMPGVSAPAARGVQLDILEQLITRVIANHRQGIAQIMLADIAECNPLFDIDNRSGKVAARLINQLLAVAVT
397	MAG14_120	MAG14_120_397	356	0	2	3	2	0	3	4	2	1	0	0	0	1	0	0	18	hypothetical protein	atgcctcaaatcacgacaagtgatcttcaaaaaatagtcagtcagtttgaagaatacctctaccaaaagccttctattagccaagctaataaccaaccttttaattccaaaaaattagtaaaattacagctagaagacccactcaaaacgttcagttttggtcctaataaggggcataatgcattcgtggccgcactgagggcgtgtcctgaaaaacgtattatagaacggggtattaagatcattcagaatgccagatacactggttgttcaacaacagaagagaaacaacaggtactgtcagagctattgagtattaccgaaggtgtcgatccgcataattcgtctgttgattaa	MPQITTSDLQKIVSQFEEYLYQKPSISQANNQPFNSKKLVKLQLEDPLKTFSFGPNKGHNAFVAALRACPEKRIIERGIKIIQNARYTGCSTTEEKQQVLSELLSITEGVDPHNSSVD
398	MAG14_120	MAG14_120_398	956	0	0	5	4	0	3	9	9	1	0	0	0	0	2	0	33	hypothetical protein	atgcatcccctccactatgcggctcaacatggttttatccattctgtgaagtatctgttagagcagggcgatgcacaacaactcattcgtttgaaaaataagagccagaatagcctagtgcatctggccgctatcgctggacactccgatttattacagtggttagcaaatcaatacggtaaagaggtactgctcgaaaaaggtcataatggttttacagcgctgcattttgccgccaaagaaggtcatttgaattgtatcgaaccattattgaacgcggcacctgatagcctccatcttagagaagacggcggcagctgtcctgctcactgggcagcctgggcagggcacttagatattctggtgcgggtggtagaaaaaaatgggacgcaaattctg…	MHPLHYAAQHGFIHSVKYLLEQGDAQQLIRLKNKSQNSLVHLAAIAGHSDLLQWLANQYGKEVLLEKGHNGFTALHFAAKEGHLNCIEPLLNAAPDSLHLREDGGSCPAHWAAWAGHLDILVRVVEKNGTQILSEKGNGGNNTLCFAAQNGYLDCVQYILAMCKGLQGEVNAVGQNALHIAAENNKAEVLQWLIDQSDSEDLKATDKNGNTLLHLAAAYESDPCVEMILKYGDNLHALKNKNGLTAAHLATIKGSLDTLKRMVKKNDHKILLEKNDDAKNCLHLAAQQDKAEVMQWLIGQSDSEDLKATDKWGNNLLHW
399	MAG14_121	MAG14_121_399	410	2	0	18	0	8	8	6	16	13	0	0	0	0	4	0	75	Transposase	tctcgccgtattattggctggcacattgataaaaggatgacaacggctctggttagagctgctatggtgaaagcttacaatactcgtcagccacctaaaggcttagtttttcatagtgatataggatcgcagtatactagtaagcgataccgaaaactgctgtctggctatggtattcgtgcaagcatgggggacgttggagcgtgttgggacaatgctgtagttgagcggttttttgggagcttaaagcatgactggatttttaaggtagctcaacctacgcgggaacatatgaaaaaagatgttgtggcatacatgaagtactacaacctttatagattgcatacggcaaatgaggatcgctctccaattgaatatgaaatttattatcaagaaagt…	SRRIIGWHIDKRMTTALVRAAMVKAYNTRQPPKGLVFHSDIGSQYTSKRYRKLLSGYGIRASMGDVGACWDNAVVERFFGSLKHDWIFKVAQPTREHMKKDVVAYMKYYNLYRLHTANEDRSPIEYEIYYQESQAG
400	MAG14_121	MAG14_121_400	149	15	13	57	8	19	13	17	45	8	2	0	0	3	6	0	206	Mobile element protein	atgttggggtttaaatccatgaaaacagcttatgccaccattaaagggattgaagctatgcgagccctgaaaaaggggcacgctgataattggtactacgcgaaccccttgggaggagtgcgcctagtagaaagggtatttggtttgtaa	MLGFKSMKTAYATIKGIEAMRALKKGHADNWYYANPLGGVRLVERVFGL
401	MAG14_121	MAG14_121_401	197	2	6	10	0	3	2	2	10	1	0	0	0	0	5	0	41	hypothetical protein	atgtacctgagttggagaaacgactacactggtattaccgcaagccttgctcatggtgcagctagcgactggatgaaacatatattaaaattgccggaaagtagtgctatctttatcgtgcaactgataaatatggcaatacactggatttttacctgtcagcccgtcgtaacacctacgctgccaagcgtttcctag	MYLSWRNDYTGITASLAHGAASDWMKHILKLPESSAIFIVQLINMAIHWIFTCQPVVTPTLPSVS
402	MAG14_121	MAG14_121_402	176	0	2	12	2	4	6	9	15	6	2	0	0	0	0	0	59	hypothetical protein	atggcattgattgaaggtgatcaagccgagttgttgcagggaattgtagaactggacgaaactttttttaaagaatcccgaaaaggtgagtgcaatttagaccgccctgccagaaagcgaggtggagggaagcggttatattcatctatgccattctctcaaagaaaactggcgtag	MALIEGDQAELLQGIVELDETFFKESRKGECNLDRPARKRGGGKRLYSSMPFSQRKLA
403	MAG14_121	MAG14_121_403	2159	22	16	51	12	31	44	82	135	48	0	0	0	2	6	0	468	Limit dextrin alpha-1,6-maltotetraose-hydrolase (EC 3.2.1.196)	atggttagtttttccattcatcccgttactgatcctattcaaggtgcacattatcgctcagccttctatcttgagagtcagcagcgaagtgccagtggtgtgcagtttggtctcaaatctacacaagcaactaaggttgagttgtgcctttttgatcaacatggtggtgagcaacatataacgatcccctggtgtgataatcatatatggcatgtttttgttgaaggcatacaaccaggtcaacattatggctaccgtgtacatggtccttggaatcctgcgcaaggtctgcgttttaatccagctaaactattatttgatccttatgcccaaaaattagcgggtcaacttcagtggtcaaaagagctgtatgactatgaagttggagaaaatgggcaa…	MVSFSIHPVTDPIQGAHYRSAFYLESQQRSASGVQFGLKSTQATKVELCLFDQHGGEQHITIPWCDNHIWHVFVEGIQPGQHYGYRVHGPWNPAQGLRFNPAKLLFDPYAQKLAGQLQWSKELYDYEVGENGQWCHSRCDSAAYVPKSVVITHQFDWSNETRPNYKMAESVIYELSVRGFTMMHPDVPEPLKGTYLGMCQPEIMNYLKSLNITAVELLPITSQVTEQRLAKKGMKNYWGYNPLAFMAPEDSLAVNDPIVELKTMIKCFHEAGIEVIIDVVYNHTAESGTDGPLLSYRGIDNLSYYLVDNKAPVISINHSGCGNTIRAEHPMVIQLIMDSLRYWVEEYHIDGFRFDLAPILGRRHLSFDTYSALFQAVEQDPILKSVKIIAEPWDLAADG…
404	MAG14_121	MAG14_121_404	2204	16	14	50	12	30	103	41	119	34	0	0	0	0	21	0	442	1,4-alpha-glucan (glycogen) branching enzyme, GH-13-type (EC 2.4.1.18)	atgaatactgctgttacattcgtaccatcgataagtcgattgaagcgtgctttatgtgcttgcccttttgactggttgggtttgcatgtcggatctggcggtaaaggattagtcattagagtctggcgacctgatgcagcggctatcaaggttattgaatacccgactgaaaaaaatataggggtcatgaaaagtactgaggcaggtgtattcgagctgctgttgcctcggcgtcgcaaatgttttacgtatcaattacagttaacgcttcatcaaggcggtcagctcagattatttgacccttaccagttcggtgaatacgtattaaagcaatctgacctagacaatactgctctttatcagcacctcggtgcccatctacacgttcatcagtttaac…	MNTAVTFVPSISRLKRALCACPFDWLGLHVGSGGKGLVIRVWRPDAAAIKVIEYPTEKNIGVMKSTEAGVFELLLPRRRKCFTYQLQLTLHQGGQLRLFDPYQFGEYVLKQSDLDNTALYQHLGAHLHVHQFNSKHNISGVLFRVYAPNAASVSVVGDFNAWDGRISPLASADDGIWRLFVPGIKEGMLYKYELHDSQGRLLELKADPFGEYAEQWPGLASIVYNRARYQWRDSQWLETRKDKQGYDQPITAYEVHAGSWRRKPNGDFLTYRDLAHQLVPYLKKMAFTHVELMPISEHPLYDSWGYQPIGMFAPTSRYGTPDDFKYFVDCCHQQGIGVIMDWVPAHFPEDSHGLALFDGTPLYEYADAQRGWHPDWQTHIYDFGKPWVGDFLVSNALYW…
405	MAG14_121	MAG14_121_405	1448	19	22	95	29	36	73	33	154	48	0	0	0	4	21	0	534	Glycogen synthase, ADP-glucose transglucosylase (EC 2.4.1.21)	ttggcttctgatcttaatattatttttgcagtatctgagctggcaggcattgtaaagactgggggactggctgatgcggccggcggtctcgcacctgccatgatacaacaggggcatgatgtacgtatcataatgccaggttatcgagaggcgttgaaaaagttgcattcaagggtgatagcttctggtgaagttacgattaactatcattataaaataggctttgcattgcgaaaagcttactttgaaggcatagcaatttaccttattgagcaccatgacttttttggtcgagatggtctttatggtatgcacggtgaaggttatgatgataacagtcagcgttttgcctttttttctaaagcagtacttgaagcttgtttacttatagatgttcgg…	MASDLNIIFAVSELAGIVKTGGLADAAGGLAPAMIQQGHDVRIIMPGYREALKKLHSRVIASGEVTINYHYKIGFALRKAYFEGIAIYLIEHHDFFGRDGLYGMHGEGYDDNSQRFAFFSKAVLEACLLIDVRPDVIHCHDWQTALLPYYLRIHEGNNLFFQNTATVLTIHNAAYQQHTDPAQMDALGIAWRYFNDACFEDHQKINLLKGGIAFADKITTVSPNYAEELLTELGGHGLTDSFRRRHSDLSGILNGCDYRHWDPSIDELIPELYSKDALQGKHVCKRLLQERMHLTVDNRCPVYGVVSRLTDQKGFSFLLPALQKFLHKNIQVVVLGSGDQKIATELQWLSQRYPEKCRFINGFDNELAHWIEAGSDFFLMPSLFEPCGLNQMYSLKYGA…
406	MAG14_121	MAG14_121_406	1223	51	29	102	9	17	72	64	186	38	0	0	0	0	25	0	593	Glucose-1-phosphate adenylyltransferase (EC 2.7.7.27)	atggcatccgtattgtcaatgattctagccggtggtgctggaaaaagactctcaccattaactgcagtaagggcaaagcctgcagtgccttttggtgggcaataccgcattattgattttgtgttaagtaactttgttaattcagacctacataaaatctatttggtcacacagttcaaatcacattcgttgagtaaacatgtccagcgttgttggcggattgccggtttatccgacaaatttattgatacattgccagcgcaaatgtggacgggtgatgactggtatcagggtacagcagatgctatttaccagaatatccaccatatcgcttctcacaaccccgatatggtatgcgtttttggtggcgatcatatatatactatggatgtgcggcaa…	MASVLSMILAGGAGKRLSPLTAVRAKPAVPFGGQYRIIDFVLSNFVNSDLHKIYLVTQFKSHSLSKHVQRCWRIAGLSDKFIDTLPAQMWTGDDWYQGTADAIYQNIHHIASHNPDMVCVFGGDHIYTMDVRQMINQHENSDADLTVAAIPVPVNQAHNFGIIEIDDNSRMIGFQEKPKSKPKTIPGNPNYVLASMGNYVFNKDCLIRELEADAGVASSSHDFGKDIIPSFFPRAKVMIYDFSTNEISGDLNDGYWRDVGTLDSYWQANMDLLPSRPKINLYNQQWPINTYIPPYPPALIAYDQEFREGRINHSMMATGCIVNDVFLDNSVIGYNVNIGDQARISYSVILPNVKIGEGAEIRRAIIDKRSEIAPGAKIGVNIEEDRKRFKVTESGLVVV…
407	MAG14_121	MAG14_121_407	1652	6	10	31	14	23	89	42	160	26	0	0	2	0	14	0	417	Phosphoglucomutase (EC 5.4.2.2)	atgaatccaactgctggcgagcttgcaactgaagactttcttgttaatattcctcgtttggtcagcgactactataccaataaacctgacccagaaaatcttgagcacaacgttatttttggtacctctggtcatcgaggtagtgcttttgactgcacgttcaatgaaacgcatattcttgcaatcagccaaagcatttgtgactaccggagcagtcaaggtattgttggtcctttatttcttggtatggatacccacgcattatctgagccggctcttatcaatgccgttgaagtttgtgtagctaatggtgttgaagtggtaattcagcagggtaggggttacacgcctacaccggttatttctcacgctattattacccataatagggctaataga…	MNPTAGELATEDFLVNIPRLVSDYYTNKPDPENLEHNVIFGTSGHRGSAFDCTFNETHILAISQSICDYRSSQGIVGPLFLGMDTHALSEPALINAVEVCVANGVEVVIQQGRGYTPTPVISHAIITHNRANRVKADGIVITPSHNPPADGGFKYNPPHGGPAETDITYWIEQRANQLISERLSRVKRIAFKSAMAANNLHEYNYILPYIQDLDQVLDMKAISQSGINIGVDPMGGAGIHYWEPIATYYNLNLEVVSDKIDPTFSFMPVDKDGKIRMDCSSAYAMSGLIKLKNKFDIAFGNDPDFDRHGIVTRQHGLLNPNDYLATTIDYLCRYRSDWPDAASIGKTLVSSAMIDRVAEGVQRKVTELPVGFKWFVNGLATGTMAFAGEESAGASFLRK…
408	MAG14_122	MAG14_122_408	1121	8	0	33	9	2	9	10	10	2	2	0	0	0	4	0	89	Glutamine synthetase adenylyl-L-tyrosine phosphorylase (EC 2.7.7.89) / Glutamate-ammonia-ligase adenylyltransferase (EC 2.7.7.42)	atgatgctgcccggatcttatcctcaatgtatggcgcaagaattagagcaacgctggcaacagcttgttgcttattttcataagcagggccaagcagataagctaaaagcctgtaaaacagactttttagcacagctatttaccacatggtcaggcagtgactttgtggctgaggcattcacccgataccctgagtatttactttatttttatacactttttcagacaaatggttttgtgctaacggatttagcgcatcatcaaaatgaattgagtcaatggttaaagcatgttcattcagaagagtccttaatgaaacagctaaggcgctaccgcaacagggaaatgattcgaatcatatggcaagacctcaaccgtttagtcagtcttcaagaaata…	MMLPGSYPQCMAQELEQRWQQLVAYFHKQGQADKLKACKTDFLAQLFTTWSGSDFVAEAFTRYPEYLLYFYTLFQTNGFVLTDLAHHQNELSQWLKHVHSEESLMKQLRRYRNREMIRIIWQDLNRLVSLQEITRDLSALANACLEHALTWLYKNLTATLGTPVGGAFGEESAPQQLVIIGMGKLGADELNMSSDIDLLFAYPHQGETTGGPRVLTNQEFFIRLGQRLIKVLETRTAEGFVFRVDMRLRPYGDSGPLVMSFSAMEQYYQDQGRDWERYAMIKAQIVAGDKSQGNMLLVKLKPFVYRRYIDFSVITSLRDMKKLIEREVKRKGMESNIKLGPGGIREIEFITQSFQLIHGGKDRHLQKRALLDVL
409	MAG14_122	MAG14_122_409	122	0	0	6	0	0	2	0	1	0	0	0	0	1	0	0	10	hypothetical protein	ttgaaaatgctcaaaatagccctgctattactcgtcatttcaactggctatggagtccggctgtttattctcattaaggtagtgaagaaaacaattgatattattttatcgtgcgttagctga	MKMLKIALLLLVISTGYGVRLFILIKVVKKTIDIILSCVS
410	MAG14_122	MAG14_122_410	134	1	0	3	2	3	4	0	2	0	0	0	0	0	0	0	15	hypothetical protein	ttgctgggtaatatttacattgttggtaaaatcaagaacagtgcaagttggtggcaaccattttggtttgcaatcatatattcatgcataaaagcctattatattgtgagcatcactgccgtaaagtataactaa	MLGNIYIVGKIKNSASWWQPFWFAIIYSCIKAYYIVSITAVKYN
411	MAG14_122	MAG14_122_411	542	6	10	47	8	5	26	19	21	10	2	0	0	2	0	0	156	hypothetical protein	atgctagaagtcacggcagggtggaaaaccaaagtcttgtttctttttataggtattttttttcttgtcagtggcttagcgtatatcattggcattcgaattaacaacacagccagtatccctttgggtatctacagactaacagaagaaaagccagtaaaaggggattacgtcatgttttgccctcctaaacgaccagtgtttgatatggctttgaaaagaggttacatcgacgcaggcttttgctctggacaatacggccatatcatgaagcgagtgttgggcgttgctggagatcacattaccgtgaccccaaaggcagtaaccgttaatggtcaccccattgcaaatagtgcccaaatggctgtagatctgggtaatagccccatgcccgtctac…	MLEVTAGWKTKVLFLFIGIFFLVSGLAYIIGIRINNTASIPLGIYRLTEEKPVKGDYVMFCPPKRPVFDMALKRGYIDAGFCSGQYGHIMKRVLGVAGDHITVTPKAVTVNGHPIANSAQMAVDLGNSPMPVYQQPDITLGSDQFLLMGENPISFDARYFGLINRSQINGVIHPLFTWKN
412	MAG14_122	MAG14_122_412	560	6	2	23	8	10	15	17	45	19	0	0	0	0	2	0	158	Cytochrome b561 homolog 2	atgatcatctggaaaaatacaccaaaaaattatggcttagttagtatttttatgcactggatcagtgcgctgactgttttttctttatttggtgttggtctatatatggtttctttgtcgtattatgaccctctttatcaaacattacctttttggcataaaagtattggacttagcttgctgactctaaccttagctcggttggtatggaaagctttcaatcctgcgccaaagccgctgcctacgcattcaaaaacaataaccatgctagcattatttgggcactatagtctttaccttttgatgctgatgactatgttcagcggctatcttatcagcactgctgatggccgacctatttcattttttgggtggtttgatatccctgccttaatcaca…	MIIWKNTPKNYGLVSIFMHWISALTVFSLFGVGLYMVSLSYYDPLYQTLPFWHKSIGLSLLTLTLARLVWKAFNPAPKPLPTHSKTITMLALFGHYSLYLLMLMTMFSGYLISTADGRPISFFGWFDIPALITGIAKQEDFAGLVHFCLAWTLVILAVSHGLAAIKHHVIDKDQTLKRMLTSKQHK
413	MAG14_122	MAG14_122_413	593	2	2	15	6	8	28	55	80	39	0	0	0	2	4	0	243	hypothetical protein	atgaagtcgattaaatcattaatggcaacagccatgctctcaatcagtgtacttggcttttcgttaagcgcagcagcttcagagtatatcattgatacaaatggagcccatgcctttattaattttaaaataagtcatttaggttttagctgggttcatggcaatttcaaaaatttcaaaggaaccttttcttttgatgctgttgacccgacaaaatcaaaagttaacgtggaaatagatacaggctctatcgatagtggccatgccgaacgtgataagcatattaggggagataagtacctcaatagcagtgaatttccaaaagcttacttcgtaagtaagcgtatagaaaataagggaaaaaacaatgtccttatatacggcgaccttaccataaaa…	MKSIKSLMATAMLSISVLGFSLSAAASEYIIDTNGAHAFINFKISHLGFSWVHGNFKNFKGTFSFDAVDPTKSKVNVEIDTGSIDSGHAERDKHIRGDKYLNSSEFPKAYFVSKRIENKGKNNVLIYGDLTIKGIKKPIVIDAVKIGEGKDPWGGYRAGFSGTTSINLADFNIASLGPTATKVYLTLDVEGIRKEEK
414	MAG14_122	MAG14_122_414	380	0	4	11	5	2	34	18	27	16	0	0	0	3	2	0	122	Aspartate 1-decarboxylase (EC 4.1.1.11)	atgcaaagcattatgttaaaggcaaagcttcatagagctcaggttactcatgctgtactagattacgaaggatctctatctattgatggcgatctgttaaaaatatcaggtttgcgtgagaatgagcaaattcagatctataacattgataatggcgaacgttttacaacctatattattcaagcagagccaggctctggtgttatgtctgttaatggtgccgcagcacataaggtcactgtaggtgatcgaattattgtttgtgcttatggtgtatatgatgaacatgaggttaagcaccataagcctaggctgatttatatggatgaaggtaatacggtaagtcatacagcaaatgccattgctgtccagcttgcttag	MQSIMLKAKLHRAQVTHAVLDYEGSLSIDGDLLKISGLRENEQIQIYNIDNGERFTTYIIQAEPGSGVMSVNGAAAHKVTVGDRIIVCAYGVYDEHEVKHHKPRLIYMDEGNTVSHTANAIAVQLA
415	MAG14_122	MAG14_122_415	857	10	8	31	17	6	76	28	71	12	0	0	0	0	22	0	281	Pantoate--beta-alanine ligase (EC 6.3.2.1)	atgaatattgttcactctattactgaagttcaggatgatataagcaagaaaaaatcttgtggcaataagattgcatttgttccgactatggggaatttgcacggaggccatcttaccttggttgataaggctaaggcgttggcagatgaagttgtcgtaagcatttacgttaacccgttacagttcggagttaacgaagattatgacgcttatccgagaaccatggagaaagattgtcagttgttagaaaaacgaggagttaatttagtatatgctgctactacaaaggaaatttaccctgaaggaagtgagtatcatacccatgtaacagtagatagtttagatggtatgcattgcggtaaaacgcggcctcatttttttcgtggtgtagcaaccgtc…	MNIVHSITEVQDDISKKKSCGNKIAFVPTMGNLHGGHLTLVDKAKALADEVVVSIYVNPLQFGVNEDYDAYPRTMEKDCQLLEKRGVNLVYAATTKEIYPEGSEYHTHVTVDSLDGMHCGKTRPHFFRGVATVVTKLFNIVRPDIAVFGEKDFQQLMIIRKMVNDMCMPVEIIGAPIAREDSGLAKSSRNGYLTQSDRETIAPTVFEALNYAKSAIQSGERDYDAISRHAFTMLANAGITPDYFNVCNPKTLLPACEKDNTIVILAAGLLGNVRLIDNIHFSIKH
416	MAG14_122	MAG14_122_416	134	0	0	0	0	0	0	0	0	2	0	0	0	0	0	0	2	hypothetical protein	atggtagctagaaagcacgattggcataataagctatctcaggtatttcaattttcattctgtaactacgataaagaaaaaggggagactttaaattgtacccatctcaaatacggtgctataagtattttatag	MVARKHDWHNKLSQVFQFSFCNYDKEKGETLNCTHLKYGAISIL
417	MAG14_122	MAG14_122_417	1220	2	0	8	1	8	2	10	12	8	0	0	0	4	2	0	58	Uncharacterized MFS-type transporter	atgtcacatttttttgcaccactggctgggctggtcatgtttgccttgggaagcggctatttaatgaccctagtgcctcttcgaatcagccatttagaatatagcaacatgttctcaggactgattggtagcgcctattatctgggcttatttgcgggttcctttcgatctgaaaagcttgttagccgtgttggattcatccgttctttttcagggtttatggcaattttatgttgctctgtccttcttatggctgtttttactgatatttattcttggatactgctgcggtttataaatggcgttacagtggctggcatttttgttgctcttgagtcttggctcttgcgtgagagtgactctaaaaataggggaagaatactctctttctacatggtt…	MSHFFAPLAGLVMFALGSGYLMTLVPLRISHLEYSNMFSGLIGSAYYLGLFAGSFRSEKLVSRVGFIRSFSGFMAILCCSVLLMAVFTDIYSWILLRFINGVTVAGIFVALESWLLRESDSKNRGRILSFYMVSLYGAHALGQLFVGILDSDTLLPFIVIGALLSLSIFPPATTRSPTPELSEKPSALHLKALFSLTPSGATGCFAGGLVLGALYAILPIYLLRTYTDNTDISILLSITMAGGMILQYPIGHLSDFFDRRKVLIAVSLAGVACCLAYMLIENNFWLQLVILFFIGGATFTLYPLSISHGCDHMLPEDIVAGTQGLLLFYSVGACLGPLLGSLLTRLMADGLMLFFVLVMGGLACFFMWRLFDRPAIYSSDEQPFIAMPRTTAVVAQLDP…
418	MAG14_122	MAG14_122_418	620	4	2	3	0	0	6	0	6	10	0	0	0	0	4	0	35	Cell division protein FtsN	atgagttcacgcctccagtcaaaacgtggtgccagtaagacgaaaaaaaagcctagtttatatgtaggaagtttgtccaatgtacccggttggctatggctagttactggggttgcagctggttttttgattgcctttcttttgcgaggaagtcctaacaaccagttccgccaggttgaagcgaataaatcaacattagccaaaaataatacgcttcctaccccagtttttgatttttatacattgttgccagagtctaaagtcactacgggtgaagacaagcagctattggtggtagataacaaccctcaagataaaggaaaacctgttttaggggaaaagcagtctttgatatcgccacattttgatgctcatcaagataaatcggtacgctacatt…	MSSRLQSKRGASKTKKKPSLYVGSLSNVPGWLWLVTGVAAGFLIAFLLRGSPNNQFRQVEANKSTLAKNNTLPTPVFDFYTLLPESKVTTGEDKQLLVVDNNPQDKGKPVLGEKQSLISPHFDAHQDKSVRYILQAGSFKSLKDAERLRTQLLQWKLEPQVKKVDIGGGEYWHRVQVGPFTSQPSLENARQILVDNKIDTLLLKIK
419	MAG14_122	MAG14_122_419	143	0	2	8	1	0	0	2	4	0	0	0	0	0	0	0	17	hypothetical protein	atgatacaaagggtgtatgctaattacgataatgagcttggtaaacaactggatatcagaacaagcgcaatgaagtgtattgcaaggcaagatatgccaacactgttatcagtattgccagtactaaccagtactaaaaggtag	MIQRVYANYDNELGKQLDIRTSAMKCIARQDMPTLLSVLPVLTSTKR
420	MAG14_122	MAG14_122_420	113	0	2	5	2	1	7	5	10	0	0	0	0	0	0	0	32	hypothetical protein	ttgagccacttaccattttcagctagcatgacatccatgaatacagagactcaaaaactaattttctctctccaaaaatactttcgcttgcaaaaaaaccgacgacgtatctaa	MSHLPFSASMTSMNTETQKLIFSLQKYFRLQKNRRRI
421	MAG14_122	MAG14_122_421	1739	15	11	79	22	33	95	101	208	65	2	0	0	2	24	2	660	Arginyl-tRNA synthetase (EC 6.1.1.19)	atgaatattttcaagctgcttgaagataaaattattaaagcgcttattactgtcggagcacctgctgacacccctgctatggtgcgccaaagcactcgcgccaacttcggtgattatcagtgtaatgcggttatggcggcagctaaaaaaatgggcagaaacccacgcgatgttgcccaagaggtgattaaccatctcgaattagatggtattgcagaaaaaactgaaattgcaggtccgggatttatcaatatttacctaaaatctacatggcttgccagcaatctacaaaatatggtgactgatgcacgagcaggtgtaccagtagctgagaaaaaaaccatcgtagtggactactctgcacctaatgtagccaaggaaatgcatgttggtaatctg…	MNIFKLLEDKIIKALITVGAPADTPAMVRQSTRANFGDYQCNAVMAAAKKMGRNPRDVAQEVINHLELDGIAEKTEIAGPGFINIYLKSTWLASNLQNMVTDARAGVPVAEKKTIVVDYSAPNVAKEMHVGNLRSTIIGDASVRTLEFLGHKVIRQNHLGDWGTQFGMLIAHLEELEKENQEALSMELSDLETFYRTAKQRFDEDPDFSEKARNYVVELQSGDEYCLKLWKKLVDVTLAHNQESYNRLNVSLTPADVMGESAYNDNLPVIIKELGEKGLLTEDQGAQVVFLDEFKNKQGDPMGVIVQKSDGGFLYTTTDLAAIRHRCHTLNADRVLYYVDERQGQHFKQIFAIARKAGFASEHTELEHHAFGMMLGKDGKPFKTRSGGTIKLSDLLDEA…
422	MAG14_122	MAG14_122_422	140	1	2	4	6	0	9	5	5	4	0	0	0	0	2	0	38	hypothetical protein	atgcttattacggtagttagaaaactactggcggtattaacgctaaattgctacataactttatctgctttcgctatagcacagctgatatactgctcacggctactcatcctttttattacacgttacaagcgtcgatga	MLITVVRKLLAVLTLNCYITLSAFAIAQLIYCSRLLILFITRYKRR
423	MAG14_122	MAG14_122_423	1121	1	2	20	0	4	3	8	21	8	0	0	0	0	6	0	73	Diaminohydroxyphosphoribosylaminopyrimidine deaminase (EC 3.5.4.26) / 5-amino-6-(5-phosphoribosylamino)uracil reductase (EC 1.1.1.193)	atgagcaaattctctgctgatgaccacttgtatatggctcgagctatccagcttgctgatcttggcacctatacgactatgccaaaccctagagtagggtgcgttatcaccaatggggaacaggttgttggtgaaggttggcatcagtgggcgggtgaagttcatgccgaaattcaggcgttgaatcaagctggtttaaaagctaagggcgccacggcttatatatcactagagccctgtgcgcactggggaaaaacgcctccctgcgtcaatgccttaatcacagcaggtatcgccagagttgttgccgcaaccgaagacccaaaccctttggttgctggtcgtggcctagcgatgttaacaaaagcaggtattgataccgccagcggcttactcgca…	MSKFSADDHLYMARAIQLADLGTYTTMPNPRVGCVITNGEQVVGEGWHQWAGEVHAEIQALNQAGLKAKGATAYISLEPCAHWGKTPPCVNALITAGIARVVAATEDPNPLVAGRGLAMLTKAGIDTASGLLASQAQLINSGFIKRMLTGKPMVRAKLAMSVDGRTAMASGESKWITGADARSDVQRLRASSCAIVTGVESIIKDNSSLTLRLEDMKMAGAEQIINRQPLRVVLDSQLRTPPSAKVITGPGQCLIVCTKKADVQRKKALEHAGAEVLVQDTHKEQVCCSLLLDELGNRACNEVLLETGATLAGTMLQEDLIDELIIFMAPVLMGNKARELFQLPFDNMSEKRQLSITDIRAIGNDWRITAKPM
424	MAG14_122	MAG14_122_424	119	0	0	1	0	0	1	0	3	0	0	0	0	0	0	0	5	hypothetical protein	gtgttttctgactgccatcatgaacataacaaccggcctacagcaggcatgaccaacaatagcaaggctgttgcgaaatgttccaaagcagttctagtgttcagatggtcagctcaatag	MFSDCHHEHNNRPTAGMTNNSKAVAKCSKAVLVFRWSAQ
425	MAG14_122	MAG14_122_425	74	0	0	1	0	0	0	0	1	0	0	0	0	0	0	0	2	Permease of the drug/metabolite transporter (DMT) superfamily	atgatgttacgaaattatcttttcctgttagccatcggctgcatctggggatcgcagtttatttttcaacaaatg	MMLRNYLFLLAIGCIWGSQFIFQQM
426	MAG14_123	MAG14_123_426	698	0	2	6	2	0	0	12	10	10	0	0	0	0	6	0	48	ABC-type antimicrobial peptide transport system, ATPase component	atgagtgtgataactaaacctataattcagctggaaagtgttcagttcagttggaagcaaggcctgcctgtattactgattgatgaactatcagtaaaagcccatgagaagctatttatttacggctcgtctggctctgggaaaaccaccttgctgggcttgatcggtggtgtccttgtcccagatagcggctcagtttctatccttggccaatcttttaatacactttcactctcacaacgcgatcattttagggccaatcatattggttttatttttcaactctttaatttaattccttatctttcaattattgaaaatatcactttgcctttgcagctttcagataatcgaagacatcgtttaacagagcaatcagttaatggaatctcagaagca…	MSVITKPIIQLESVQFSWKQGLPVLLIDELSVKAHEKLFIYGSSGSGKTTLLGLIGGVLVPDSGSVSILGQSFNTLSLSQRDHFRANHIGFIFQLFNLIPYLSIIENITLPLQLSDNRRHRLTEQSVNGISEAERLVKQLGLYDPSLLKSPVTELSIGQQQRVAAARALIGQPEIIIADEPTSALDEATRNDFIQLLFTECQSANSTLIFVSHDISLKPLFDRSISLDKINVK
427	MAG14_123	MAG14_123_427	536	4	0	8	0	4	7	7	9	1	2	0	0	0	0	0	42	hypothetical protein	atgaaattaataccagccattcttagcacttttgcaacattattaactgttacatctatttatgctgagtcccatcatcatggggctcatgtacacggcaaagggaaattggacattgccattgataatacatcagtacacatgcagctcattgtgcccactcaagacattctcggctttgaaaaaattcaaactccctatcaactatcagcgctgaacaaagcgctggatcagctaacatcaggcggattttggatactgcctaaaaaagcaaaatgcaccctggtcaatgctaaaacattgaaaccaacagatgactatttaaagcatgatagtcatgaccataatcatcctgagcacagcgatattgctgtcgcctactcataccaatgcctaaac…	MKLIPAILSTFATLLTVTSIYAESHHHGAHVHGKGKLDIAIDNTSVHMQLIVPTQDILGFEKIQTPYQLSALNKALDQLTSGGFWILPKKAKCTLVNAKTLKPTDDYLKHDSHDHNHPEHSDIAVAYSYQCLNPKALNVLKTTFFEHFTGSNLIEVQALTATEQRSGTLTPEKIEFRL
428	MAG14_123	MAG14_123_428	128	0	0	2	0	0	0	0	0	0	0	0	0	0	0	0	2	hypothetical protein	atgctatctgataatattttattagccactcagcccagtattagccgcgtaacttatggtatttatcaggcaatgatcgagaaagtatggtataggatgataaaaaaacaatttgaatatttattatga	MLSDNILLATQPSISRVTYGIYQAMIEKVWYRMIKKQFEYLL
429	MAG14_123	MAG14_123_429	1199	2	0	4	4	6	13	4	26	8	0	0	0	2	4	0	73	Mannose-6-phosphate isomerase (EC 5.3.1.8)	atggaaacaagccggttgtttcgcttaaaaagcagtatacagaattacagctggggtagtcgtgatgctcttagtaagttatttggtatacctaacccagccaatgaacctcaagctgagatatggatgggtgctcacccaaaatcaccgtcactggttgaaatagaacaagggcaatacatgccgctcgatcagctgattcagcagcatggcagaaaaattttgggagatgatatcgcctgtcaatttgatggaaaattgccatttttatttaaggtattatccgcagcagagccattatctattcaggcccacccaaataaagcgcaagcggagcaaggatttaagaaagaaaacgacacaggaatatcattgaatgcgccgtttagaaactataga…	METSRLFRLKSSIQNYSWGSRDALSKLFGIPNPANEPQAEIWMGAHPKSPSLVEIEQGQYMPLDQLIQQHGRKILGDDIACQFDGKLPFLFKVLSAAEPLSIQAHPNKAQAEQGFKKENDTGISLNAPFRNYRDDNHKPELIYALTPFKAMCAFRPLEQIAAYFRLLNNRFIDEQLDMLTSKFDETGLKQFYATLMQASNEQIADIITDAFSAASTHDDLAFKTLCNLVEKYPADIGVLSPLLLNIVELQPKEALFLDAGTLHAYLEGTGLEVMASSDNVLRGGLTPKHVDVPELLATIDFRSVASDQLKLPPRRVERTIEYPVPVNDFSYTLLPIEQTLMHRQSNAVSLLFCNAGHFLAQDHSHKLHLKPGDACLVPANTEYSLSGKGEAVIISCCGK
430	MAG14_123	MAG14_123_430	380	0	0	2	0	0	1	0	2	0	0	0	0	0	2	0	7	hypothetical protein	atgataaaaaaaacaggctttacctttattgaagtgatagcaacattggttataattgtaatccttaccactgttgcgctgccttcttatcagcaatatgttgtcaaaacacgacgctctgatgcctatattgctttaatgcttgctgctgctgaacaagagcgggtatttgcaattaacaaccgttacttatcagatatcaacctattgggtggagcaatatcacctgaaaaattctatgaacttactgtcgatctgacaaatacaggttatatattaagagcaatggctatgccagaaacaagtcaagcattagatgaagattgtcagataatgacgcttaataatttgggtattaagttaccagaaatatgctggtaa	MIKKTGFTFIEVIATLVIIVILTTVALPSYQQYVVKTRRSDAYIALMLAAAEQERVFAINNRYLSDINLLGGAISPEKFYELTVDLTNTGYILRAMAMPETSQALDEDCQIMTLNNLGIKLPEICW
431	MAG14_123	MAG14_123_431	896	0	0	2	0	0	4	0	6	0	0	0	0	0	0	0	12	hypothetical protein	gtgaacaaaataaaccagaaaagagctatctattggtggccgcacttggtcagatacggttatttcagtctgctgcttatttttgtgatgggcacatcatggtttgcatctgagggtaaattgagttcgataggcgaacaattattaggcagtatttatagtgaaaatcacgtttatatcagtgccgctacagaacgaacagccgcgatgttgctcgttctatcagagctgcatgcaggtcttgctgttttacaaagcagcgactttggcatcaactttattcttagtgcaaatatcaatctaggcaacgtcatagcacagttgaccgagttagttaatcatggaaagagttatgcactttataatcttattgcgttagaggtaattgacaacctgatg…	MNKINQKRAIYWWPHLVRYGYFSLLLIFVMGTSWFASEGKLSSIGEQLLGSIYSENHVYISAATERTAAMLLVLSELHAGLAVLQSSDFGINFILSANINLGNVIAQLTELVNHGKSYALYNLIALEVIDNLMNLIKWLTPWLLLTIQLALFCLIAVWGWLPGKSHWYAPLVRCSETLIAFSLLLTVIIPLSITLVSYASKSVTEISHHKSYKEIVNTHHHILQNKDEDSIKNQATGALNTFKMIKNNLTQKARHIASNISTYIAVSFLEVFILPIFFSLFIFCLYTKIIKRYSHVKK
432	MAG14_123	MAG14_123_432	812	0	0	2	0	0	0	0	4	0	0	0	0	0	0	0	6	Lyzozyme M1 (1,4-beta-N-acetylmuramidase) (EC 3.2.1.17)	atgaaaaacaacaataatgataaaaaaataataaaaagcaacaggttaacataccttgttgactttattttagtgggtataatcagttgctttatgtactataatttcatcaaaatttctgaacaagaaaattatatttactcagaaataaacagcaaaaaaattaaaatagaaagaagcaagctagcagcaaattctgaaaaaccaaataatagctctgcattactcaatggggttgacgtctctcactatcaaggggaggttcaatggcagcaagttgctgatacatatcactttgcttttattaaagcgacagaagggacaaattatatcgatccaagattccaagaaaatattaataatatagaaaatacgtcgatgaaatatggcgcttatcat…	MKNNNNDKKIIKSNRLTYLVDFILVGIISCFMYYNFIKISEQENYIYSEINSKKIKIERSKLAANSEKPNNSSALLNGVDVSHYQGEVQWQQVADTYHFAFIKATEGTNYIDPRFQENINNIENTSMKYGAYHFFNPALDAIEQAKHFINTIAHENLSLPSVLDIEIEPIGSNQSLQASVKDWLVYVEKATGCRPIIYTNKHYWLTYLADHFTDYPLWIGDYTTSDNRMVSIPWAFWQYTDKGKVTGINGIVDKSHFDGNAVKLNKFSCI
433	MAG14_123	MAG14_123_433	422	0	0	1	0	2	0	5	3	4	0	0	0	0	0	0	15	hypothetical protein	atggatcaaaaagtattcagcacagaaatgaatgtccaagtcatccatctgaactatggcaaccatcttgctcatgatgcaacggtgcggatgcttgaagagtctcgaatgcgctggattaagactttcaatagcaatgcttcagaagttagcttagaaggaaatattggctgggtagtaaaatctttttgtattaattacgaatcagaagcgacacatggtcaaacccttcgttttgacctatacccaaaaaatttgaagcggacaagcttagaaataattcatgttgttactaatctttcgatacaaaaaagactttgtaagtgtgatatgaagctagtattttcaaatagaatcaatttgaaagtagctcgtgcacccacaaagttttttgacttc…	MDQKVFSTEMNVQVIHLNYGNHLAHDATVRMLEESRMRWIKTFNSNASEVSLEGNIGWVVKSFCINYESEATHGQTLRFDLYPKNLKRTSLEIIHVVTNLSIQKRLCKCDMKLVFSNRINLKVARAPTKFFDFISAAMTV
434	MAG14_123	MAG14_123_434	182	0	0	0	0	0	1	0	2	0	0	0	0	0	0	0	3	hypothetical protein	atggcgctctccgctttgatatcttacccgccctcaaaggcgggaattcatattgctagggcgatgcccaagcgtaaatatatagcacaatttttttgctgctttatttttgaactcgtatatatgcctataacatttttattaagaaaatcgcttatggaaataatagccttcaatatttaa	MALSALISYPPSKAGIHIARAMPKRKYIAQFFCCFIFELVYMPITFLLRKSLMEIIAFNI
435	MAG14_123	MAG14_123_435	953	4	6	11	2	12	21	24	15	10	0	0	0	0	8	0	113	Arsenical-resistance protein ACR3	atgggaaatttattcccaacaagcattgcagaaaccaatgctgagttatccataggttcaactaacatagctcttgctattggcctaatttttatgatgtatcccccattagccaaagttaactacgggttaatgggtaaagtattacaaaataaacgggcagttacattatctttagtgattaactggataattggccctattttaatgtttttcttagcccttacctttttaggtaaccacccttcattaatgataggagtcattcttattggtttagcccgctgcattgcaatggtcttggtatggaatgatattggtggcggcaataaagaatatggcgcagcactggttgccattaacagcgtgttccaaatttttacttacagtattttagct…	MGNLFPTSIAETNAELSIGSTNIALAIGLIFMMYPPLAKVNYGLMGKVLQNKRAVTLSLVINWIIGPILMFFLALTFLGNHPSLMIGVILIGLARCIAMVLVWNDIGGGNKEYGAALVAINSVFQIFTYSILAWLFITVLPPYFGFQGHLIDISMESIAKSVLLYLGVPFLAGFFSRKILVANFGEPWYEEVFLPKISPITLIALLGTIVLMFSLKGKMIIELPMQVLLVALPLAIYFLVMFFTTFFIAKRLGIPFDQNASISFTATGNNFELAIAVAIGVFGLNSQEAFAGVIGPLIEVPVLIALVNVALKLKQQY
436	MAG14_123	MAG14_123_436	341	0	0	9	4	6	3	4	4	4	0	0	0	0	8	0	42	hypothetical protein	atgcaatgtactctcagtgatcctaacctactaaacacactagagctctgtaccactcaacagaacactctagccgagttggcaaaagccgtagggcaccctgccagagttaaaattttacatattttaagcttactcgagcaacaaggcggctgtttaaatgctgacttagtagaacatttacaacttgcacaatccaccgtatcagaacacctcagcatccttaaaaaggctaacttggtaaaggctatcaccataggtaaaaaaagctgttatgtattcaacagagagcgcttaaacaaccttaacacgctaaccaatactctcttttataacctttag	MQCTLSDPNLLNTLELCTTQQNTLAELAKAVGHPARVKILHILSLLEQQGGCLNADLVEHLQLAQSTVSEHLSILKKANLVKAITIGKKSCYVFNRERLNNLNTLTNTLFYNL
437	MAG14_123	MAG14_123_437	1748	0	0	4	2	1	3	2	6	4	0	0	0	0	0	0	23	hypothetical protein	atgatattatttaataggccacttcaatgcgatcaccaaccacgtttaaaaataacgccttgtgatggggaaggtcgttatttgggaaaaagagttaaacctaagtatgctaatcataagctagcagcttatgataaaaatgctaacctcgctgcttttgataaaaataagcatagattcaataatggaaatatcattaatattaatacagctaataatatatcaaataatgcgttgcgaggctgtttagaaaatatctatcatagaatgcaaacccagaataattcaatgaaagaagcagcaataaatgatcttaagaaactcttttctaggaaaaatatttcagtaaccgatttaaaaaaagttcttacctccattaataaaccgtgggctgatgcc…	MILFNRPLQCDHQPRLKITPCDGEGRYLGKRVKPKYANHKLAAYDKNANLAAFDKNKHRFNNGNIININTANNISNNALRGCLENIYHRMQTQNNSMKEAAINDLKKLFSRKNISVTDLKKVLTSINKPWADACLSDQEMIAFTLFTAFKVSDLADKLTKIVSYYIIKNPDNIILENKKQTRYKASYLDNLRNDKKNIPDYNMPSRLPNKPAYRKPALIKKSWQFNREDKLRNNLPFTRVQAENLKGQLFTAELLNSVPDEVLKKYGWSKQEIGILPTNKDKAYLSNAAETNLGLKHMSIRNNFRYFGQGGFGKVKLARIQLPSRTRPQVCVAKKMSGHTVNLQETKKEIALQNQSGVAPRVYGLADTKNKKNSRQYIVFMEPAKGCNGYDYIHQQRHK…
438	MAG14_123	MAG14_123_438	1778	0	0	3	1	0	3	0	6	0	0	0	0	0	0	0	13	hypothetical protein	atggagccacttaatcagtcgtctatattagaaaataaatcatttttaaaagtaaaatcttgcgaaatgcaaggcgattttttaggaaaaaaagttaagcttaagcatgttgatcataagctattagttggtgataaaaacgaaatatctactgtttttgataaaaataataagcgtgatttgaaagaaaaatattcaacccttgttcctgggaataaaaaaaagagtactgctaatatccttattcctaataattctaggaatgtatcagattatgacttaaagcgctacttagaaaatatttatgatagggttaaaaacaagaatacttcaattaaaaaagcagcaataaatgaccttaagaaacttttttctgaaaaaattattccagcaacccaa…	MEPLNQSSILENKSFLKVKSCEMQGDFLGKKVKLKHVDHKLLVGDKNEISTVFDKNNKRDLKEKYSTLVPGNKKKSTANILIPNNSRNVSDYDLKRYLENIYDRVKNKNTSIKKAAINDLKKLFSEKIIPATQLNKILISISINETWAFSCLYDSEMQQKYMSFTEYNTSDLADQFAEIILTKMEENFEANKHDGENIFGYDSLSSGLQGKPMPEMELEIYWSYNREDKREKKLPFTRVQGENLAGQLFTAELLNSVPDEVLKQYGWSEQEIDILPINKNKKYLSDAAKVNLNLEHINYENNFRYFGLGSFGKVKLARIHLSNGKELVCVAKKIVGKEDSLSDLNKEIKLQNQSGVAPKVYGIADTVNKENKRQFIVFMEAAKGCDGFDYINQQYDKMT…
439	MAG14_123	MAG14_123_439	143	0	0	1	0	0	0	0	0	0	0	0	0	0	0	0	1	hypothetical protein	ttgcattatggtacagttcatcggaatgaaataaaaaattatcaacaaaaaaataatgaatatgcgcctatatttttagtggtcttttggaataaaagacatttagattttaataaatatgtaaataagaatttttattattag	MHYGTVHRNEIKNYQQKNNEYAPIFLVVFWNKRHLDFNKYVNKNFYY
440	MAG14_123	MAG14_123_440	1559	9	4	19	4	9	1	10	33	10	2	0	0	0	3	0	113	hypothetical protein	atggtttttacattaatgccttttggtttttattcaatgatacagtttagattatttaagtctgttttacttttctttgctattgtgtttttttctatgcgtgtgtcggctatagagccgctggctatagcaactacagcagctgcagcatatgaagcgcctgctgttgttgattccgctttattagggatagctggcaaagaagggttagaatttactacgtttcttaacgtaaaaatgaaagaaatggagagagatggtttttcttttactcaaaaagcatgggttggcggtgtgggcgcattagctttttttgggcctgttgtcgctagtttttttatggctccagtttttaatcatttgcaagaaaaccctaattttcctgcttttgtcgatttc…	MVFTLMPFGFYSMIQFRLFKSVLLFFAIVFFSMRVSAIEPLAIATTAAAAYEAPAVVDSALLGIAGKEGLEFTTFLNVKMKEMERDGFSFTQKAWVGGVGALAFFGPVVASFFMAPVFNHLQENPNFPAFVDFMEGATKLYGAYMMWKLEKTHTYDSKKEGHARKLQEKKIKTLEEEANRSGDEFAKKLVEHMRNKAKKKEKEKEKSFRKHLLELVSQSGREGAEIMVFTALASIIKLQADYPYSAELMQSLIGSVSIGLGIPLSIVAVGAGIKYGPVMCKEFEKMFCSASSTENHVHGDHESEFCDCGLVDRMLYQYNVAQIFFTLFKGALSSSGIHEVAESLKLDVKFYDLTGGNYFIWDEKEPLGNIISALVPWDTDPDMIQFTVMAISWVSAFRL…
441	MAG14_123	MAG14_123_441	1097	12	18	36	6	4	10	16	33	18	0	0	0	4	6	0	163	Alanine racemase (EC 5.1.1.1)	atgagccgcccaaccaaagcgttagttaatttgcaagcattaagacataactaccatcttgctaagcaactatctgaggggcgcatcattgctgtagttaaagccgatgcctacagccatggtgcaactcgctgcgctcaagcacttaatgatgtagcagatgcctttgcagttgcctgtttagaagaggcattggcattgcgagacgctcatattgagcagcctatcattgtgctggaaggtttttttgatatatcagaaatgggtttaattgaacaacatcgcctcgatgttgttattcattgtcaacaacagctcgcgctgttaaccgctagctctattaaacaacctatgcgtgtctggctgaaaatggatactggcatgagtaggctggggttt…	MSRPTKALVNLQALRHNYHLAKQLSEGRIIAVVKADAYSHGATRCAQALNDVADAFAVACLEEALALRDAHIEQPIIVLEGFFDISEMGLIEQHRLDVVIHCQQQLALLTASSIKQPMRVWLKMDTGMSRLGFSPAEYRQAWKALQSLDFISEIVMMTHFACADELTNIKTAQQLEIFKAQTSGLPGSKSIANSAGIIAHPEARAEWNRPGLMLYGVSPFPEHHLIEQSLQPVMTLHSAIISIKDIPVGQTVGYGGSWVAKRPTRVGVVAIGYADGYPLHAKEGTCVLIGDQKAPLIGRVSMDMITVDLTDLANTQVGTPVMLWGNNLPVAEIAHCADTIPYQLLCNLSRLPVEYINEPILEPSD
442	MAG14_123	MAG14_123_442	809	4	2	8	3	8	20	13	24	6	0	0	0	0	0	0	88	Putrescine transport system permease protein PotI (TC 3.A.1.11.2)	atgaaacgattgggtttttcaactgcaatgctaggtgccggaattttattcttgtacctgcctatgtttatactgattttttattcctttaatgcatcaaaattagtaaccgtttgggctggtttttctggaaagtggtatattgggctatttcaaaatcaacaactaatgagcgctgcctgggttagcttacgcattgcattttataatgcctgcatggccgttattcttgggacaatggctgcctacattatggctagataccgtcggttcaagggtaaaacgctatttgcaagcattacgacggcccctcttatcatgccggatgtaattattggcttatccttattgctgatgttcgttagcctatcagactggtttggctggccagcgcaacga…	MKRLGFSTAMLGAGILFLYLPMFILIFYSFNASKLVTVWAGFSGKWYIGLFQNQQLMSAAWVSLRIAFYNACMAVILGTMAAYIMARYRRFKGKTLFASITTAPLIMPDVIIGLSLLLMFVSLSDWFGWPAQRGILTIWLAHVTFSTSYVAVVVGSRLREVDMSIEEAAMDLGAPPVKTFFLITVPSISSALVSAWLLAFTLSLDDLVIASFVSGPDATTLPMMIFSSVRLGVSPEINALATLIILAVALATTIVWWLMRRSNNASYEF
443	MAG14_123	MAG14_123_443	920	8	0	12	2	4	3	8	18	4	0	0	0	0	0	0	59	Putrescine transport system permease protein PotH (TC 3.A.1.11.2)	atgcgagcgctgcaacaagagcaaataggtgccttgagggcacggtgggggcgccgcatggtgattggcgttccttacctttggttactgattttctttctgatcccttttgccattgtggttaagatcagtttttctatggctgatatagcaatacccccgtatacccaaattattagctacgttgataatacgttgtcgattaatttagatctaagtaattatttctaccttgtggataattcgatctatctgaaatcttacctaatttctatcaagttagcctttatctcaacattgctgtgcttattgctaggttacccaatggcctatgctatgtcgaaaacagcaaaaagaacgcaatctttgctgttcgtcctagtgctacttccttcctgg…	MRALQQEQIGALRARWGRRMVIGVPYLWLLIFFLIPFAIVVKISFSMADIAIPPYTQIISYVDNTLSINLDLSNYFYLVDNSIYLKSYLISIKLAFISTLLCLLLGYPMAYAMSKTAKRTQSLLFVLVLLPSWTSFLIKIYAWMGILKNNGLLNNALIWLGVIDQPLHILNTNIAVYIGIVYAYLPYMVLPIFANLVKLDQSLQEAAKDLGATPLRTFFSITLPLSRSGIIAGCMLVFIPAIGEYVIPELLGGSGSLMIGKVLWQEFFNNRDWPLASALAVVMLLLLCIPVALFNRQQTKERGVNV
444	MAG14_123	MAG14_123_444	1142	4	0	15	13	8	20	16	31	10	0	0	0	0	4	0	121	Putrescine transport ATP-binding protein PotG (TC 3.A.1.11.2)	atgtctattcctgctgctgcctataaaaaaaatcaggataatgcccagcttaaaacagatatattcgttaatattgatcgtgtgaccaaaatgtttgatggtgttgttgctgtcgatgatgcttcgctatctattcgcaaaggcgaaatttttgctcttctagggggttcagggtcagggaaatcaacattactcagaatgctggcaggctttgaaaagcctacccaggggagcatattccttgataaagaagatatcacgctattaccgccttataagcgccctattaatatgatgtttcaatcctatgcgctatttcctcatatgaccattgctaaaaatattgcatttggactaaaacaagatcgcatgccaaaagaccagattgagcaaagggtt…	MSIPAAAYKKNQDNAQLKTDIFVNIDRVTKMFDGVVAVDDASLSIRKGEIFALLGGSGSGKSTLLRMLAGFEKPTQGSIFLDKEDITLLPPYKRPINMMFQSYALFPHMTIAKNIAFGLKQDRMPKDQIEQRVKEMLEIVHMEQYASRKPHQLSGGQRQRVALARSLAKQPKLLLLDEPMGALDKKLRSQMQLEVVEIIEEVGVTCLMVTHDQEEAMTMADRIGIMEAGWIVQVGTPIDIYENPNSRMTAEFIGSVNMFESHIVEEAADHVLLGSKELSAPIYVGHGITAALEERKVWYAIRPEKTLVTVTKPMSKYNWSKGTVDDIAYLGAYSIYHVKLPSGKIVQSNMTNMERNADRPTWDDEVYISWDTTSGVVLNN
445	MAG14_123	MAG14_123_445	164	0	0	2	2	1	2	0	4	0	0	0	0	0	0	0	11	hypothetical protein	atggcttttggtaattaccaacctcttataaacagttcccaaaataattatttttacatattgcagaaagaagggatttccaaatgctgtgaaaaaaaggaaaatgcaatttttcataaatacctagcatctgtacaagatacttataccaatcgtattttctaa	MAFGNYQPLINSSQNNYFYILQKEGISKCCEKKENAIFHKYLASVQDTYTNRIF
446	MAG14_123	MAG14_123_446	488	0	0	4	4	0	8	2	7	2	0	0	0	0	2	0	29	Leucine-responsive regulatory protein, regulator for leucine (or lrp) regulon and high-affinity branched-chain amino acid transport system	atgagaagccgaaaagaacttattcgtcagctagatagaattgatcgtaatattctacgcatacttcagacaaatgggcgtatttcatacgtcgaccttgctcttaaagtgggcttgagcactacgccttgtatggagcgggtaaagcgcatggaaaaagaaaatatcattagagactatagtgcaaacttgaaccctgtctatttacaagcagggttactggtttttgtagaaattagcttatatacaaagtcaaaagatatttttgatgattttcgccaagcggttgttcagctgcccaatgtgcttgagtgccatttagtgtctggagattttgattatctggtaaaggctagaatttcagagatagcatcttatcgagagctcttgggtgatatt…	MRSRKELIRQLDRIDRNILRILQTNGRISYVDLALKVGLSTTPCMERVKRMEKENIIRDYSANLNPVYLQAGLLVFVEISLYTKSKDIFDDFRQAVVQLPNVLECHLVSGDFDYLVKARISEIASYRELLGDILLKLPGVRESKSYIVMEELKETLNLPIAD
447	MAG14_123	MAG14_123_447	530	0	6	16	8	15	6	29	22	8	0	0	0	18	6	0	156	hypothetical protein	atgctagcaactaagaaaaaagcagccactaagaaaaaaacggctgcaaagaaaaaaacagctgctaaaagtagcacgccagccaaggtagacccggctgttaagaaagcacaaggtgacgttgaaaagcttgataaagacttaaaaaagctacaagcacagattaaaaaagcaaaagctactttaaagaaaaagaaagaagcagccaagaaaaaagccgctgccgagaagaagaaagctgccgctgctaagaaaaaagctgccgccgccgccaagaaagcagctgatgctgctaaaaagaaagccgctgccgccaagaagaaaacagccgctgccaagaaaaaaccggttaagaaaaagactgttaagaaggctacagcaagtaagacaggcgcaaag…	MLATKKKAATKKKTAAKKKTAAKSSTPAKVDPAVKKAQGDVEKLDKDLKKLQAQIKKAKATLKKKKEAAKKKAAAEKKKAAAAKKKAAAAAKKAADAAKKKAAAAKKKTAAAKKKPVKKKTVKKATASKTGAKKKPSASKAAAKKKVAKKSPVKKTAAKKKAVKKSPAKTAAAKKK
448	MAG14_123	MAG14_123_448	740	29	13	78	29	29	95	71	245	77	0	0	0	8	73	2	856	hypothetical protein	atgaaattaagaacgtttataggtatcaccctcgtttcttgctccttgcaagccttagcttccacgccagcaagcacaggtgtagacctttcaacgaaagaaggtaagctaagttacagcttaggcgtcgtcatggcagaacagttaaaacagtttgatggcatcaacgcggatgatttaacacaaggcattaaagatattttaaacaataaaccgcctcagattgatcgtcaggaaatgtttaaattgattgatgaagctagggtggcgcaagagaaaaaaatgcaagaaaagtttcaagctgaagccagtgagaatctaaaagcaggacaggcattcctgacggaaaatgctaaaaagcctgacattaaagtattagatggcgggctgcaatacaaa…	MKLRTFIGITLVSCSLQALASTPASTGVDLSTKEGKLSYSLGVVMAEQLKQFDGINADDLTQGIKDILNNKPPQIDRQEMFKLIDEARVAQEKKMQEKFQAEASENLKAGQAFLTENAKKPDIKVLDGGLQYKIIKEGKGIKPTANDEVVVQYEGRLLNGKVFDSSYQRNEPAVFRVNQVIRGWTEALEQMPEGSEWELYIPSDMAYGPNGIPGRIGPNSVLLFKVQLLDVKKEGGKDETTKKLKG
449	MAG14_123	MAG14_123_449	464	19	10	53	16	20	42	33	79	32	0	0	0	2	19	0	325	Regulator of sigma D	atgctggagggttgcaaaacagccaaagagcgctggggaggcgtatccgagataattgatcgatggatcaatgggcgccaagagttgattgtcttatattgctctatcaatggggttgatcaactaaatgatgacaaaagaccactttccatgaagcttcaagagttttgccaaattcttgttgattatgtttcagctggtcactttgaagtttatgagcagttaaaccaagaagggctggagtttaatgatggtggaatcgagctggctcaatctctttatcctcagattaaaagtaatacgcatttatgtctggattttaatgatagttgtgaaaccgtcagtaacattaggagtcttcaaagtatgctttctgcgctaggtgaaacccttgaggaa…	MLEGCKTAKERWGGVSEIIDRWINGRQELIVLYCSINGVDQLNDDKRPLSMKLQEFCQILVDYVSAGHFEVYEQLNQEGLEFNDGGIELAQSLYPQIKSNTHLCLDFNDSCETVSNIRSLQSMLSALGETLEERFMLEDKLIEILHESHRENIL
450	MAG14_123	MAG14_123_450	119	0	0	10	0	4	8	3	2	1	0	0	0	0	0	0	28	hypothetical protein	ttgaagtgctttgctaaaacggccatgacatcgctttttcaatatacagaatctcttgttattttctacagcgttataccaatcatggtttctaatgaccgtattaaacataggagatga	MKCFAKTAMTSLFQYTESLVIFYSVIPIMVSNDRIKHRR
451	MAG14_123	MAG14_123_451	497	6	6	9	0	2	6	6	13	8	0	0	0	0	0	0	56	Periplasmic thiol:disulfide oxidoreductase DsbB, required for DsbA reoxidation	atgactatcccgaattcaagaatattattcgccttggctgcgctaatctgctcaggcctgatgagtttttccttattgctgcaatacatgcaaggacttgaaccctgccctttatgtatatctcagcgcattgtggtgttattactcatgctggtaacatcacttgcaagtttgcataaccctaaaggaaagggatttaaaatttacggcgggctagttattttattgggactagcaggtatagctttagctagtcgccaaatctggattcaacatttgcctccagaagacatgccaacgtgtatgcctgatttagagtatttagctacgcttttaccgtttactcagctcattactatcatgctgaccggaacgggtaattgctctgaagttcaatgg…	MTIPNSRILFALAALICSGLMSFSLLLQYMQGLEPCPLCISQRIVVLLLMLVTSLASLHNPKGKGFKIYGGLVILLGLAGIALASRQIWIQHLPPEDMPTCMPDLEYLATLLPFTQLITIMLTGTGNCSEVQWVFIGLSIPKWTLLLFSSFTAFGFFEVLKKPKS
452	MAG14_123	MAG14_123_452	1544	16	14	33	16	22	45	20	91	26	0	0	0	0	8	0	291	Glutamate--cysteine ligase (EC 6.3.2.2)	ttgactatcctttatcagaagcgtcttgagcaacttgttcgttcagaaaataacgaattgctcaaccgtattcgccatggtattgaacgcgaagggctgcgggtctctaacactgcagagctatccacagcccatcaccctgactcgtttggcaaggcgctcacccacccgtatatcacaactgacttttctgaagcattgctagaatatattacacctgtctattacaacgtagatgatgcattaggcttcttatacgagttgcagagctatacagcacagcatttcaaccaagaactgctttgggctggcagcatgccttgcctgctaaatggatctgataatatacctattgccaaatacggtcagtccaacattggcaaaatgaaaacaatttat…	MTILYQKRLEQLVRSENNELLNRIRHGIEREGLRVSNTAELSTAHHPDSFGKALTHPYITTDFSEALLEYITPVYYNVDDALGFLYELQSYTAQHFNQELLWAGSMPCLLNGSDNIPIAKYGQSNIGKMKTIYRQGLSRRYGKAMQVIAGLHYNFSLPEDIWPLLDLEPSEGYLALMRNFMRYSWLLMYCFGASPAVSRTFFADGGANSGLDSLGNTTLYLPHATSLRMSDMGYSNNAQSSLNICYNSLEEYADSLWDAICTPYKAYQDIGVEVGGEYQQLNTNLLQIENEYYSTIRPKRIARSGEKPLTALSRDGIEYIEVRCMDINPFNALGVSAQDARFLDIFLFYCALQESNTINVNECQEIKTNFSKTVLKGRCPDLTLNNSGTVCSLAAWGDD…
453	MAG14_123	MAG14_123_453	2324	16	38	73	20	34	76	58	146	20	0	0	0	4	36	0	546	Transcription accessory protein (S1 RNA-binding domain)	atggatatcatctctcagcgtatagccgaagaacttggcgttcgtgagccccaagtcatcagcgctgtcaaactgcttgatgatggtgctaccgtgccatttattgcccgatacagaaaagaagtaactggtggtcttgatgacactcagctaagaaccctagaagagcgatttcgttaccttcgcgagttagaagagcgccgccaagtgattctcaacagcatcagtgagcaggaaaagctaacacccgagctaaaaaaagatattcaagcagccagtactaaaacgcgcttggaagacctgtatttaccgtataaacctaagcgaataacgaaaggccagcttgcaataaaggccggtcttgagccattagcagaagcattgtttggtaaccctgag…	MDIISQRIAEELGVREPQVISAVKLLDDGATVPFIARYRKEVTGGLDDTQLRTLEERFRYLRELEERRQVILNSISEQEKLTPELKKDIQAASTKTRLEDLYLPYKPKRITKGQLAIKAGLEPLAEALFGNPELSPEDEAGGYVNADKGIENTKMALEGARHILMERLSENAELVGKLREFLWETAYLKSNVIDGKQEDGAKFRDYFDCTELFQKVPSHRALAIFRGRKEGFLQAGIHLSNEPKNHNETHPCEKLVADFWDISDQGRAADSWLKEVVRWTWRVKLLTQLETELMTRLRERSEDEAIKVFAKNLHDLLLAAPAGLRPTIGLDPGLRTGVKVAIVNGTGKLVEHTTIFPHAPHRKWKESLGALATLCLTHNIELISIGNGTGSRETDRLVA…
454	MAG14_123	MAG14_123_454	122	8	1	6	2	0	2	2	13	4	0	0	0	0	0	0	38	hypothetical protein	ttgaataccagtactgcgttagaacgcttcacaatcgccctgctattattcgtcatgcctttttatgctggagtcaagttgcttatgcctattatggtagttagaaaacatgatgagtgttaa	MNTSTALERFTIALLLFVMPFYAGVKLLMPIMVVRKHDEC
455	MAG14_123	MAG14_123_455	2255	9	6	37	16	12	31	16	51	26	0	0	0	2	4	0	212	DNA topoisomerase IV subunit A (EC 5.99.1.3)	atgacggaacagagctttattggtaatgatggtattgaacggcaaagcttgaagtcctacacggaaaatgcatacctgaactactccatgtatgtcattttagatcgtgcgcttcctcatattagcgatggattaaagccagttcaacggcgaattgtctatgcaatgagtgagcttggtttaaaaaataccgctaaatttaaaaagtctgccagaacggtcggtgatgtattaggcaagtttcatcctcatggtgacagtgcttgttatgaggctatggttctgatggcacagcccttttcttatcggtatcctcttattgatggccagggcaactggggttcagcagatgatccaaagtcctttgccgccatgcgttataccgagtctcgcttaact…	MTEQSFIGNDGIERQSLKSYTENAYLNYSMYVILDRALPHISDGLKPVQRRIVYAMSELGLKNTAKFKKSARTVGDVLGKFHPHGDSACYEAMVLMAQPFSYRYPLIDGQGNWGSADDPKSFAAMRYTESRLTAYASNLLNELEQGTVDWHPNFDGSLEEPAILPARLPNLLLNGTTGIAVGMATDIPPHNLKEVAAACVHLLDHPKATVAELNAFIKGPDFPTEAELITPKADIQKIYEAGRGSLRMRAVYQLDGEEIIITALPHQVSGAKVLEQIAAQMQAKKLPMIEDLRDESDHENPTRLVIMPKSSRVDHTSIMQHLFATTDLEKTYRVNFNMIGVDGRPQVKPLNTALLEWLSWRCDTIKSRLRFQLDKIVKRLHILEGLMTAFLNIDEIIEL…
456	MAG14_123	MAG14_123_456	119	0	0	2	0	0	3	3	0	0	0	0	0	0	2	0	10	hypothetical protein	gtgcaagcaatttacctttattatgctcagctgcattttcagtgtgttcgtacactacatcaaaaaggaattgaccagtcatcataccaattattgttgctaactacgctattgcgttaa	MQAIYLYYAQLHFQCVRTLHQKGIDQSSYQLLLLTTLLR
457	MAG14_123	MAG14_123_457	995	8	3	16	4	5	12	12	30	12	0	0	0	0	0	0	103	hypothetical protein	atggctaaaagaatctgcttgatgttattgaccttactcatcgctggttgtgtggctgtagaagaaaacgctaatcctcataaccaaacggtcaagcctaagcattcagcaacacaatctgagcttcagctttatcaaggagcctgggatgacagcgtccaaagcgcagcagatattagcacctctacaaaagctgcattacaagctgatcaggcgcttgctcgcggcgataaaaataaagcagctgccttttatgcaagagccattgagctggataaaaaaaatgtcaatgcgggatataagctggctgtacttcatgaagatgcaggtaactacggccaggcagaacagctttaccgctatttattgaaacagtcaccacggcataccggtattctt…	MAKRICLMLLTLLIAGCVAVEENANPHNQTVKPKHSATQSELQLYQGAWDDSVQSAADISTSTKAALQADQALARGDKNKAAAFYARAIELDKKNVNAGYKLAVLHEDAGNYGQAEQLYRYLLKQSPRHTGILEGLGLILLEQNNLKEARRLLVKSVAIFETQNTRENNLQNHIPIKAFNGLGLIADRNGDYQQAQAYYRQGLSLNPDSASMMNNLAYSYFLAGDWKKAKALLYQVLQIQPHYPRAVYNLALVNVRDRRFNKAVELLEQFMEPYEASNDVGYLAMMVGDNVAAAELFQQAIDLAPSYYETAWKNMDKLKQLSGISKTEIKQ
458	MAG14_123	MAG14_123_458	2174	10	16	34	5	12	26	22	64	20	0	0	0	0	8	0	225	ATP-dependent DNA helicase UvrD/PcrA (EC 3.6.4.12)	atggatgcaaccctactacttgactctcttaatgaatctcagcgcacagccgtaacagcgcctctttcttctatgctggtattggcaggtgcaggtagcggaaaaactcgagtattggttcatcgcattgcatggctggtaaagatggaaggtctatccccctattccattatggcggttacttttactaataaagctgctgctgaaatgcgctcaagaattgaatcattactcagcattgcgccaagaggcatgtgggttggcaccttccacagtctttctcatcgattactacgaagtcattggcaagatgcaaaattaccggaaaactttcagattattgatagcgacgatcaagctcggattatcaagcgaattatgaagtcgatgcagctggat…	MDATLLLDSLNESQRTAVTAPLSSMLVLAGAGSGKTRVLVHRIAWLVKMEGLSPYSIMAVTFTNKAAAEMRSRIESLLSIAPRGMWVGTFHSLSHRLLRSHWQDAKLPENFQIIDSDDQARIIKRIMKSMQLDEKKWPPRQAQWYINGKKDEGLRPTYIDPGYDSFEKTMLDVYRAYHDYCEQVGVVDFGELLLRTHELMLKRPDILQHYQERFRYVLVDEFQDTNAIQYAWLRLLTGDQGRLMAVGDDDQSIYGWRGARIENIHQFSTDFSNAQTIKLEQNYRSTGSILKAANAVIANNTGRLGKELWTEGNEGDPINVYAGFNEIDEARLITDKIKEAVTQGTKRSDIAVLYRSNAQSRILEEAMLKAGIPYRIYGGQRFFERAEIKNALAYMRLAN…
459	MAG14_123	MAG14_123_459	176	19	9	33	7	15	23	48	22	16	2	0	0	0	10	0	209	hypothetical protein	atggctaaagatatgcagatggaaaaagacttcttattggataaagcaatccagaaagatgacctctacgataaaggctcaaaacgtgctctgcaaattcgtcgtgctctggaagatatggaagaaacaaagcgactgagctcactatgtggtaatgattattgggaagatatttag	MAKDMQMEKDFLLDKAIQKDDLYDKGSKRALQIRRALEDMEETKRLSSLCGNDYWEDI
460	MAG14_123	MAG14_123_460	383	8	4	20	6	4	9	9	21	8	0	0	0	2	7	0	100	Mobile element protein	atgaaagatcgaatgacagcatcgttggtaactgactctctgatgatggctatgtggaagcggaggccaacagaagggctgctggtacatagtgacaggggcagccagtatgtctcggaaagctatcagaaattgctgaaagataatggctttatttgtagcatgagtcgtaagggaaattgctgggataatgcggtagcagagagttttttccatacgcttaaagctgagcttgttcaccatgaagacttccagacaagggaagaggcgaagcaggcaatttttgaatacattgaggtctattataaccgccagagaaaacactctggcaatggctacctagcacctttcaaatatgaacagaaaattgccgaggcagcgtaa	MKDRMTASLVTDSLMMAMWKRRPTEGLLVHSDRGSQYVSESYQKLLKDNGFICSMSRKGNCWDNAVAESFFHTLKAELVHHEDFQTREEAKQAIFEYIEVYYNRQRKHSGNGYLAPFKYEQKIAEAA
461	MAG14_123	MAG14_123_461	434	13	5	18	1	3	13	9	23	4	0	0	0	2	2	0	93	Transposase	gtgacttccatgtgtcgggttatgtctgtatccaccacgggcttttataactggtgctctcgtccagaatcgaaccgaagtcaggaagaccgtgctttgaaggcagatattcgcgtgatacatgaaaaacaccgccagcgttatggtgagcgccgtataaaagacgatcttgctgagcagggtaaaaacgtcagccgtcaacgaattagtcgcctaatgaaggaggaaggcattgtttgcaaaatcaggcgcaaattcaaggcaacaacagactcccgccacaacaagccagtggctgataacctgctaaaccgtaatttcaaacgggagcagcccaatgaggcatacgtgggagacattacctatattcgcactcgagagggctgtgatgggctggtc…	MTSMCRVMSVSTTGFYNWCSRPESNRSQEDRALKADIRVIHEKHRQRYGERRIKDDLAEQGKNVSRQRISRLMKEEGIVCKIRRKFKATTDSRHNKPVADNLLNRNFKREQPNEAYVGDITYIRTREGCDGLVYERSNDSIVGN
462	MAG14_123	MAG14_123_462	296	5	0	5	0	2	8	7	25	2	0	0	0	1	7	0	62	hypothetical protein	atgtcggaaaagaaagtaaaaaattatactgctgagttcaaggaatctgccgtgaagctggcgattgagtcagagaagccagtgactgagacggctcgggagctcggagttaatagcaacactcttcatacttggataacaaagtaccaccgcctgaaggtggttaatcagcccggaaaaaatgatgagcatgtgtatgatgaagtgaaacgtttgcgtaaagagctgaaaacgcttaaagaggagcacgctatcttaaaaaaggcggcagccttctttgcaagagaaagtctctga	MSEKKVKNYTAEFKESAVKLAIESEKPVTETARELGVNSNTLHTWITKYHRLKVVNQPGKNDEHVYDEVKRLRKELKTLKEEHAILKKAAAFFARESL
463	MAG14_124	MAG14_124_463	98	0	0	4	0	0	0	4	0	0	0	0	0	0	1	0	9	hypothetical protein	atgagacaaaagtaccccagcgatatcactcgtgaacagtttgaacctattcttccgatccttgaaagtgctcgcaagaaaacgaagcctcgtaccatc	MRQKYPSDITREQFEPILPILESARKKTKPRTI
464	MAG14_124	MAG14_124_464	605	34	25	114	3	20	55	73	134	45	0	0	2	0	15	0	558	hypothetical protein	atgaaaataatagtagtgggcgctaatggtgatgttggcaaggctgctgccaatgcgttgtcggttcggcacgaggtgattcgcatcaaccgtagcagtggcgatataaaaatggatattgaggatattgatagcattcgagcaatgtatcggaaagtaggtaaaatagacgcggtagttagtacgattggtcatggacacttcggtcccgtggataaaatgaccggcgaacaattcatgcaaggcatcctgcacaaaaccttacctcaggtaaacttagtactagaaggttttgattatattaacgctgggggatcttttacgttaaccagcggagttttgaatcgtatccctatccgcgatggttccagttcagccgcagctaatggtgcgctagac…	MKIIVVGANGDVGKAAANALSVRHEVIRINRSSGDIKMDIEDIDSIRAMYRKVGKIDAVVSTIGHGHFGPVDKMTGEQFMQGILHKTLPQVNLVLEGFDYINAGGSFTLTSGVLNRIPIRDGSSSAAANGALDSFVHAAAVDMPRGIRINTVSPEVLEESRQKFDGFFHGHYHVSNEAVGLAYCKAVEGCPNGQVITVDYG
465	MAG14_124	MAG14_124_465	518	17	18	46	4	16	40	52	154	23	0	0	0	0	18	0	396	Glutathione peroxidase (EC 1.11.1.9) @ Thioredoxin peroxidase (EC 1.11.1.15)	atgaattttaatgattataaaatgcccctgctaaatggtgagttaaaatcgcttggcgactatcaaaataatattgttctagttgtgaatacagcaagcaaatgcggcttcactcgtcaatataaagctctagaagacctttatcaaaaatacaaagatgaagggtttattgtgcttggctttccctgcaatcagtttggtaatcaagagcctggtgatagtactgaaataggccagttttgtgagcggaattatggtgtcacattccctatctttaaaaaaattgatgttaatggtagcaatgcggcacctctatttcacgacctacaacaagaggcaaccggattatttggctccaagcgaataaaatggaattttactaagtttctagtaaaccca…	MNFNDYKMPLLNGELKSLGDYQNNIVLVVNTASKCGFTRQYKALEDLYQKYKDEGFIVLGFPCNQFGNQEPGDSTEIGQFCERNYGVTFPIFKKIDVNGSNAAPLFHDLQQEATGLFGSKRIKWNFTKFLVNPMTKSVCRYAPHKKPEDLDLDIRLSLNRAKRRQRAVTTAV
466	MAG14_124	MAG14_124_466	701	17	10	37	10	7	52	14	48	14	0	0	0	0	3	0	219	Glutamine amidotransferase, class I	gtgactcatataggtatattattatgcgatgatcatcgcccttatgctataaagcgctttggtacctatgataatcattttaaggcgatgctggctgaagaagaacaggcacagcaaaaatgcagcgtttggcgctgttttgaaggcaatttccctgtttcagcaaaacagtgtgatagctggattatcagtggtagcaaatggggcgtatatgactcagacagctggataaaaacgctaagggcttttattcagaatcttgacgaaataaagactaacgttgttggtatttgttttggtcaccagattattcatgatgcattaggagggcaggttgctaaatcagaaaaaggctggggtattggcgcataccctgttaaagtctatgagcaactaggc…	MTHIGILLCDDHRPYAIKRFGTYDNHFKAMLAEEEQAQQKCSVWRCFEGNFPVSAKQCDSWIISGSKWGVYDSDSWIKTLRAFIQNLDEIKTNVVGICFGHQIIHDALGGQVAKSEKGWGIGAYPVKVYEQLGSIAPGDSLKLLAIHQDQVQSMAYGFTHIAGCSFTPYAITRKGSHILTFQAHPEFNDGFYQDLCENIREKLGREALKKVKATRGQPDDRQIIRQVIRDFLL
467	MAG14_124	MAG14_124_467	1193	10	13	91	16	32	99	59	143	61	0	0	0	0	6	0	530	Multidrug resistance transporter, Bcr/CflA family	atgaaacaacaaggtttttttcaggtgctttttatattggttgtgctgacctcttgtgggcaactaacaaatacaatttatgtaccatcaatgatgcatatggcgactgaccttgctgttaaccctataagcattcaggcagttatggctatgtatttgatatcttatggattttctcaattgatatatggccctttgtctgatcagtatggccgtagacctttaatgctgattggactgttgatttttattttaggctcagttatcgccagtgttgcaggtagttttgcattattattgtttggcagcttcatgcaaggtatggggacaggagttggtggcgttatgtctcggaccgtgatgcgtgataattacagcggcttacagttgcagcgtgct…	MKQQGFFQVLFILVVLTSCGQLTNTIYVPSMMHMATDLAVNPISIQAVMAMYLISYGFSQLIYGPLSDQYGRRPLMLIGLLIFILGSVIASVAGSFALLLFGSFMQGMGTGVGGVMSRTVMRDNYSGLQLQRANSYINIAFVFSPLIAPLLGSFFENTWGWQASFQFLCVVGIFAWLLVYFRFNETHKHVGKTRISALASYKYVLSYPQFNAFTVILVAAISGIALFEATAGILFSKVMGFDPNMISILFILPIPGYLLGTWLAGRLANNYALEVIIGFGVVAMILGSLSMLIAGLAGYINIIAVLVPITFLLLGAGLIFPTATSAALEPMANNAGVAGAILGSIQNLGAGLVALVSSSIPMQSQVPMASIMCVLTLLIVMIYRLQLFPAARRVASG
468	MAG14_124	MAG14_124_468	467	135	38	244	40	35	28	66	83	46	0	0	0	2	12	0	730	hypothetical protein	atgagccataatcagaataagtacaagagtcttcaagagttagtcgacagctatatcgcatcaggcttatccgctagagaatatgttgagtgctgtgtagactcaggagatataagtgctgcggaggcgctaaagctattgtcaatattaagagatgcagaatctgtcacatttaaattatcagaagtatgtagcgatgacttttcagggctaaagatgacactgatgcggaaaagcgatgatgaccaagtggtaggtccggccttgttcaatattgctgttgataaaagcctcaacccataccgagaggaggtaattgatattattcaaaaattttctaaagaactggcgattcttgctactcgagatgaaataccagaagcagaagcaataaactcc…	MSHNQNKYKSLQELVDSYIASGLSAREYVECCVDSGDISAAEALKLLSILRDAESVTFKLSEVCSDDFSGLKMTLMRKSDDDQVVGPALFNIAVDKSLNPYREEVIDIIQKFSKELAILATRDEIPEAEAINSIDDAPEKWLDHPNIMPASETQH
469	MAG14_124	MAG14_124_469	200	0	0	0	0	0	4	0	3	0	0	0	0	0	2	0	9	hypothetical protein	atgtatagcacaggtaacccatcagctccatcccctttttttaaatccctgattgaccattactctttgcatatatctattaccaaccctatacattatttgacaatagggtacactgaagaagtgatctcaatgacagatcatacaaagcaagcttctgcgatctattcatcaggcatgggtgtaaggaggggtccatga	MYSTGNPSAPSPFFKSLIDHYSLHISITNPIHYLTIGYTEEVISMTDHTKQASAIYSSGMGVRRGP
470	MAG14_124	MAG14_124_470	845	11	15	43	8	28	41	44	103	44	4	0	0	8	19	0	368	Quinolinate phosphoribosyltransferase [decarboxylating] (EC 2.4.2.19)	atgacaactgatctcaatagtactatctacaataatgttaaacaggcgctggtcgaagatatcgctaccggcgatattacagctgagttaattcccgcaactacacaagcaacggcaagtattatttgtcgtgaacatgctactatttgtggtcgcccatgggtcgatgaggtatttcgtcagcttgatgcttcggtacaattagattggaaggttaaagagggggatcaagtgtcacccaaccaagagcttgtctacattcaaggtctagcgagaagtttgctgacaggtgagcgctgtgcgataaactttctgcaaacattatcaggtactgcaacccgctgtcatcattatgctgaacaagtaaaacaatttcctgttaagttacttgatacgcga…	MTTDLNSTIYNNVKQALVEDIATGDITAELIPATTQATASIICREHATICGRPWVDEVFRQLDASVQLDWKVKEGDQVSPNQELVYIQGLARSLLTGERCAINFLQTLSGTATRCHHYAEQVKQFPVKLLDTRKTLPGLRLAQKYAVKTGGCFNHRIGLFDAFLIKENHIAACGGIAKAITAARTIAPSKPIEVEVENIEEFKEARHAGADSIMLDNFPLPLLLETVSLNHQLGNPAPKLEASGGITDATLADIAATGVDYISIGTLTKDCRAVDLSMRLL
471	MAG14_124	MAG14_124_471	128	0	1	0	5	0	0	0	1	4	0	0	0	0	2	0	13	hypothetical protein	ttgcactttattttagaaaccggctgtctatgctcattagggttgttagaaaacatcatgggtataaggaatagcctgcacttccctgttttatcccttcataaaagccgttttataggtccacattag	MHFILETGCLCSLGLLENIMGIRNSLHFPVLSLHKSRFIGPH
472	MAG14_124	MAG14_124_472	1535	12	2	12	0	4	7	16	23	4	0	0	0	0	8	0	88	Apolipoprotein N-acyltransferase / Copper homeostasis protein CutE	atgaataacgaaaaaaaacctgccatgcgctatctgattactttgctttcaggtgccatggctcctcttggtttcagcccctttaacctgtggccattattgatggtggctgtggctattttatttatggctcacaggaatatgccgactcgccaagccttgctgaatggctttatgtttggtgttggtatgtttggtgtgggaacctcttggatatatgtcagtattcaccagtttggctcagcgtctccagcgcttgcaagcttactgaccgctgtttttgttatcgtcatatcattggtttttgttgctccaggactctggctatatagtaaattgcgacaccactggcatatggaccacccttgccagcaagcactactgttttctgcattttgg…	MNNEKKPAMRYLITLLSGAMAPLGFSPFNLWPLLMVAVAILFMAHRNMPTRQALLNGFMFGVGMFGVGTSWIYVSIHQFGSASPALASLLTAVFVIVISLVFVAPGLWLYSKLRHHWHMDHPCQQALLFSAFWVIAEWTRSWLLTGFPWLLAGYSLLDTPAANWAPVTGVYGLSFLLVITSTLLVSLIIKSKQPLRKTITSKVFVVITIASLWLASWPLAKVQWTEPTGEKLTFSAIQGNIPQSIKWHPDYIQNIIATYTNQTEQEWKQDLIIWPENALPIFYSRAQWLLQQLSQQGKNHNTALIIGLPIDMPSENQQKYYNGIIAIGAGTGIYDKQKLVPFGEYVPFESLLRGLIAFFDLPMSSFSAGSSNQKPLNVKGITITPYICYEVVYPDFAAR…
473	MAG14_124	MAG14_124_473	839	2	2	20	2	7	3	12	28	6	0	0	0	0	13	0	95	Magnesium and cobalt efflux protein CorC	atgaatgacaagaccttaacggatgatccggtacctcccacgtggatagaaaaggtatcacgattattcagtcaagatccaaaaaatcgcaatgatattatgacattgctcagagaatctgcttctaaagggatgattgatgaagaggctctgagtatcatcgagggcgcagtacaggttgcagacatgcaggtccgcgaggtaatgattccccgagcacaaatggtttgtgtcgaggaagagcaaccgccaaaagactttctgcctaaaattatagagtcagcccactctcgctttcctgttattgccgacagcaaagatgaggttacgggcattttactagcaaaagacttattaccaatggtcttacatcacgctaaatttagtattaaagatcat…	MNDKTLTDDPVPPTWIEKVSRLFSQDPKNRNDIMTLLRESASKGMIDEEALSIIEGAVQVADMQVREVMIPRAQMVCVEEEQPPKDFLPKIIESAHSRFPVIADSKDEVTGILLAKDLLPMVLHHAKFSIKDHVRPATFIPESKRLNVLLREFRTNRNHMAIVIDEFGGVAGLVTIEDVLEQIVGDIEDEHDIEEDNFIKPTNNVDKACIVKALTPIEDFNEYFKTHFSSDEFDTIGGILMQQFGHMPQRNESVEMSGLRFDVLNADGRRIRLLRVSPC
474	MAG14_124	MAG14_124_474	467	0	3	4	3	2	7	2	11	5	0	0	0	0	3	0	41	Metal-dependent hydrolase YbeY, involved in rRNA and/or ribosome maturation and assembly	atgagtgcacgggtagtagtagaccttcaggtggctactgataatcaacacctgccaacactggatgcgcttcaagcatggacaacagccgccattggtaatcgtagagatagtgcggaaatcagcttgcgtattgttgatctcaaggaagcagctgatctcaatcaacaatggcgtaataaaagcggccccaccaacgttttgtcttttccagcaaatcttcctcctgaactcagtttaccgctgttaggtgacctggtaatttgtgcaccagtcattgaaaaagaagcaaaacagcaagataaggagcttcaggctcactgggcacatataataattcacggtaccttgcacttgctgggttatgaccatatagatgatcagcaagcttcagaaatg…	MSARVVVDLQVATDNQHLPTLDALQAWTTAAIGNRRDSAEISLRIVDLKEAADLNQQWRNKSGPTNVLSFPANLPPELSLPLLGDLVICAPVIEKEAKQQDKELQAHWAHIIIHGTLHLLGYDHIDDQQASEMESLEIKIMEILGFPDPYKDDGC
475	MAG14_124	MAG14_124_475	1016	31	14	73	3	23	21	30	81	14	0	0	0	8	24	0	343	Phosphate starvation-inducible protein PhoH, predicted ATPase	ttgaacgcacatacccataaagaagaaaaggttatagaaaacacctgccgatttacccttgagccggaagacccgcaacgattttcagagttatgcggtcagttcgatcaacatttaaaacagattgaagaccggttagacgttaatattcgtgttcgggggaatagttttgctgtttcaggcagagatgacctaacccatgcagccacagagacgcttaaacacctttaccgagaaacaggtaagcaagaaacccttacgccagacagggtgcatttgtttatgcaagaatctgctattgagtggctatctgaccgaataaacagcgacgcagaaaagcctgtttctatttgcactgctaaaggtaaaggtctcatcacgccacgtgggcgtaatcag…	MNAHTHKEEKVIENTCRFTLEPEDPQRFSELCGQFDQHLKQIEDRLDVNIRVRGNSFAVSGRDDLTHAATETLKHLYRETGKQETLTPDRVHLFMQESAIEWLSDRINSDAEKPVSICTAKGKGLITPRGRNQQHYVKAILKHDINFGIGPAGTGKTYLAMACAVQALMEENVRRIMLVRPAVEAGEKLGFLPGDLSQKIDPYLRPLYDALYEMLGFEQVERLINKNVIEVAPLAYMRGRTLNNSFIILDESQNTTKEQMKMFLTRIGFGSTAVITGDITQIDLPKGIQSGLSHAIDVLKDVDAIGFTWFTAKDVVRHPLVQHIVQAYDNHDRAKGKS
476	MAG14_124	MAG14_124_476	446	4	3	8	6	2	10	2	7	2	0	0	0	0	3	0	47	hypothetical protein	acaaaggaaacagactataagccaaccaatattgacaaggcgctcattcaagggttagaagtcaatggatctataaacaatgataactggaatataaatgcaagtatcagtttgttaaaacctgagaatagatcgcctgctaactattccaaaatattaactgcccgctctaaacaactaatgacgttgactcttgatcaccagtttaaacattttggtgtaggtgcatcttttaaggctcagggattatcttatgctgatgccgccaatactcaaaaggtggctgggtttggaatctttgatttaagaggctctttaaagctaactgaagagttaaaagcaagcgtccaatgggttaatgtttttaataaaacctatcaaccagtgagtggttataga…	TKETDYKPTNIDKALIQGLEVNGSINNDNWNINASISLLKPENRSPANYSKILTARSKQLMTLTLDHQFKHFGVGASFKAQGLSYADAANTQKVAGFGIFDLRGSLKLTEELKASVQWVNVFNKTYQPVSGYRGEPKGVIASLIWTQS
477	MAG14_125	MAG14_125_477	194	4	0	2	1	0	0	0	0	2	0	0	0	1	0	0	10	hypothetical protein	catgctattattgactattcggccctattttggggttcagtagccatgctaattatggtggttagaaaacacgactggtataacagcccgacttcactcgagaagggtagtgttatttatctgtggaaaaaatcaatagataagggcgcctatagaatccggtttgtattcattgatgcgatcatgacattttga	HAIIDYSALFWGSVAMLIMVVRKHDWYNSPTSLEKGSVIYLWKKSIDKGAYRIRFVFIDAIMTF
478	MAG14_125	MAG14_125_478	623	10	3	18	7	1	13	6	20	6	0	0	0	5	4	0	93	hypothetical protein	atggcaactgtatttatttggaataataatattatttcagccgctagagggggtacatcacattatacaacaggtcatgcttcgctcaatattgatgaccaatggtgcgaagattataaatatccatatgttacttggtgggctgaaggcgtcccttttcaatatcatacagtgatcaaaaattttatagccgatattaataatgcaagatacgccccagatcatattataaaaatcccatctcctagactgaataccctgcatatgcattcagcatgggataaaataaggcaaagccgtaaaatgtcctacaatgagctttttaataactgctccacagttgttagccatattttgttagcaggtacacataacacaaaatatggcgggcgtttgctt…	MATVFIWNNNIISAARGGTSHYTTGHASLNIDDQWCEDYKYPYVTWWAEGVPFQYHTVIKNFIADINNARYAPDHIIKIPSPRLNTLHMHSAWDKIRQSRKMSYNELFNNCSTVVSHILLAGTHNTKYGGRLLKHKHIVWTPLRVKRLAYDLQGYDMAWANFINEVNSFLGLSDYCNELLSKKRRSSRHGYQEAAPARFINGKDTNI
479	MAG14_125	MAG14_125_479	149	16	8	39	5	8	17	4	34	14	0	0	0	0	0	0	145	hypothetical protein	atgctggctttaaaggatagtgaacttatcattggcgataatgatgtattgtacattactcaaaaaagccagaaaactattaagttcaggttattagttgatgaaaaatatatgtattttgtttgtttatcccaatttttggtaccttga	MLALKDSELIIGDNDVLYITQKSQKTIKFRLLVDEKYMYFVCLSQFLVP
480	MAG14_125	MAG14_125_480	449	60	50	136	14	21	39	43	66	28	0	0	0	4	10	0	471	Protein YaiI	atggtgaagatatgggtcgatgctgatgcttgtccggtggttatcagggagattttataccgcgcagcggaacgaacaaacgtaatagtgacgctggtggctaatcaatcaatcagtataccgcgatcaaagtacgttaaaatgatgcaggtagtacccggttttgatgttgctgataatgaaattgtgaagcgggctgaggctactgatattgtggttaccagtgatattcccctagcagctgaagtcattgctaaaggtgccgttgcgctgagtcctaggggggagctctattcgcctgataatatcaagacgcgtcttaatatgcgcgattttcttgatacgctccgtgccagtggtattcagactggcggtccgtcagctttgagccaaagtgac…	MVKIWVDADACPVVIREILYRAAERTNVIVTLVANQSISIPRSKYVKMMQVVPGFDVADNEIVKRAEATDIVVTSDIPLAAEVIAKGAVALSPRGELYSPDNIKTRLNMRDFLDTLRASGIQTGGPSALSQSDRQTFANHLDRLLSARS
481	MAG14_125	MAG14_125_481	965	41	43	164	28	34	110	63	141	40	4	0	0	4	26	0	703	D-arabinose-5-phosphate isomerase (EC 5.3.1.13)	atggtaccagatcacacgctgaactaccgcagtattatgattcgctcattgcaggaacaaggtaaagcgttgttagcgctgagcgaccgtattgatgcgtcttatgaagaggccgttgaattaatgctggcttgcaaagggcgagtgattatttctggtatgggcaaatcaggcataattggtaaaaaaatagcagcaacactggcttctacaggtacgcatagtttttttatgcacccaggtgaggcgttccatggcgatctgggtatggttcgcagtgaccaagaggctgacttgattgtgctattgtcatatagcggtgaaaccgaagaagttttaaagctcattccatccctaaagagctttggcaataaaattattgccattaccggtggcctt…	MVPDHTLNYRSIMIRSLQEQGKALLALSDRIDASYEEAVELMLACKGRVIISGMGKSGIIGKKIAATLASTGTHSFFMHPGEAFHGDLGMVRSDQEADLIVLLSYSGETEEVLKLIPSLKSFGNKIIAITGGLESTLAKHADIVLDGCVAQEVCPLNLAPTTSTTVALAIGDALAIALIKARNFQPQDFARFHPGGSLGRRLLTRVSDVMNKNNLPLVNTDTAISDAVLVMTETRTGTAIVLNRDKSLAGVVTDGDLRRYLTTSDSLKGVCAKDIMTPNPLCISQDMKLSEAEAKMRSAHVKCLIAVDVDQQVTGLLDWAD
482	MAG14_125	MAG14_125_482	515	8	11	55	15	14	26	8	44	19	1	0	0	2	13	0	257	Colicin V production protein	gtgaattttacctggatcgactgggttatttttggagtaattctggtttctgctggactgagtcttcggcgcggtttttttaaagaagtactctctgtattgagctgggctggagctgcttttgtcgcttgggccttcgggggcgtgtttgctgataagctggttaattatattgatttaccttcagtgcgtatcagcattgcatctatattgctgtttatctcaaccttgttggcgggtgcattcattaaccaagtggtttgtcggtttgttgaggcaacgggattctccggcactgacagagtgcttggcatggtatttggtggcctaagaggttgtctggttatcatggttctagttagctttattgctattacaccattgaaacaagagacaggg…	MNFTWIDWVIFGVILVSAGLSLRRGFFKEVLSVLSWAGAAFVAWAFGGVFADKLVNYIDLPSVRISIASILLFISTLLAGAFINQVVCRFVEATGFSGTDRVLGMVFGGLRGCLVIMVLVSFIAITPLKQETGWKNSILLPHFIELAHWSKAQATKIIEPILQKRDLVHPV
483	MAG14_125	MAG14_125_483	1511	48	28	136	21	37	87	64	139	42	0	0	0	8	34	0	657	Amidophosphoribosyltransferase (EC 2.4.2.14)	atgtgtggaattgtcggtatttcggcaacggttaatgttaaccagctgttgttcgatgcactgaccgtgcttcagcatcgtgggcaggatgcggcgggaatggtcactttggaaaacaaccgtttttttttgagaaaagagaacgggttagtgaaagatgtatttcgtacccgaaatatggcacatttacgaggaaaatcaggcattgcccatgtgcgctaccctacggcagggacttctagtgctgctgaagctcagccgttttacgttaactcgccttatggtattgcgctggctcacaatggtaacctaacaaatgctgatgtcattaaggatgccttgttttctagtgatcttcggcatattaatacccactctgattcagaaattctgctcaat…	MCGIVGISATVNVNQLLFDALTVLQHRGQDAAGMVTLENNRFFLRKENGLVKDVFRTRNMAHLRGKSGIAHVRYPTAGTSSAAEAQPFYVNSPYGIALAHNGNLTNADVIKDALFSSDLRHINTHSDSEILLNVFAHELSKNCGHSLKPHDIFLALKGVYDRCEGGYAVVAMVNGHGLLGFRDPYGIRPLVFGKRIMPEGIEYMVASESAALDALGFERIRDVAPGEAVYIDEQGVLHTFQCVEGKKYPCMFEYVYLARPDSIIDGISVYQSRLRMGQTLANKILRDWPEHDIDVVMPIPDTSRNSALELATRLGLPYREGFVKNRYIGRTFIMPGQTVRKKSVKQKLNAISQEFSGKNVLLVDDSIVRGTTSGQIVDMAREAGARKVYFCSAAPAIRY…
484	MAG14_125	MAG14_125_484	269	2	1	9	4	9	10	8	23	6	0	0	0	2	0	0	78	Cell division topological specificity factor MinE	atgaatctgatgcaactttttcgtgcgtctagtaatgatgaaaaaaagcatagtagcgcctccgttgctaaagaacgtcttcaaattattgtcgcacatgagcgaatgagtcgcggtgggcatgattttttaccagcgatgcaaaaagatattcttagcgttgttaaaaaatatatcgaagtcaatcaagaaaatataaatattcgtctcgataatgagggtgactattcgattcttgaggtcaatgtgcaattaccagacactgaatga	MNLMQLFRASSNDEKKHSSASVAKERLQIIVAHERMSRGGHDFLPAMQKDILSVVKKYIEVNQENINIRLDNEGDYSILEVNVQLPDTE
485	MAG14_125	MAG14_125_485	731	27	27	89	20	28	36	29	64	29	2	0	0	5	9	0	365	Septum site-determining protein MinD	atgcaaggacattccacagttgtcattgactttgatgttgggttgcgtaaccttgaccttatcatgggctgcgaacgcagagtcgtatacgaccttgtcaatgttattaatggcgaatcagctcttcatcaagcactaatacgcgataaacatgtagaaaacctatcagtactacctgcttcgcaaacacgcgataaagaagcgttgagtaaagaaggcgttgaaaaagtattagatgatctggcaaaagattttgattatattatctgtgattcgcctgcaggcatagagcacggcgcccaaatggctctttattttgcagatgaagcgataataaccactaatcctgaagtttcatctgtccgcgactctgaccgtatactcggcattttgcaaagc…	MQGHSTVVIDFDVGLRNLDLIMGCERRVVYDLVNVINGESALHQALIRDKHVENLSVLPASQTRDKEALSKEGVEKVLDDLAKDFDYIICDSPAGIEHGAQMALYFADEAIITTNPEVSSVRDSDRILGILQSKSRRAEKNMEPVKEHLLLTRYNPDRVLRGDMLNVSDVEEILAIPLLGIIPESGCVLKASNQGIPVIHQSETDAGQAYSDMVCRYLGEKKVHRFIEPTKKGLLRRMFGGRT
486	MAG14_125	MAG14_125_486	794	48	25	86	13	10	39	34	74	30	0	0	0	3	16	0	395	Septum site-determining protein MinC	atgactccagacttgcaatcccaaagtaccgccacagcctttcgaatgaaaggcgggctttacacactgactactctggaattgcatgttgcaacgatgcctttgattaaaaaacaattgcaattaatgacgcaaaaagcacccaactttttccagcaaacaccggttgttattgctttggagaaattacaaacgcaaccatacatgctaaatatatcttcgcttaagcatctattgtacgacttcggtatgattctagttgctgttaggggtggctcagaaagcgcccgaaaagaagctaaacttcacggtattgcatggttacccgcagcaaagagtcgaagcgaaacggatgactcaagcgaaaacaatactgctgctaatgttgtcaaaatcaca…	MTPDLQSQSTATAFRMKGGLYTLTTLELHVATMPLIKKQLQLMTQKAPNFFQQTPVVIALEKLQTQPYMLNISSLKHLLYDFGMILVAVRGGSESARKEAKLHGIAWLPAAKSRSETDDSSENNTAANVVKITKSRGLPDQENISEVETKLEKSVPDIIAQIVERPVRSGQQIYSPGDLVVLGSVSTGAELVAGGHIHVYGPLRGRALAGVNGHQAARIFCGQFEAELISVCGQYKLPANSDRSYWGKSVLVSLKDQCLHMAAL
487	MAG14_125	MAG14_125_487	935	6	0	11	3	0	10	13	18	1	0	0	0	1	4	0	67	Lipid A biosynthesis lauroyl acyltransferase (EC 2.3.1.241)	atgggttatcagaatacaacagaggccgatcagtttaaaggcgcattccttcatccccgctattggctaacgtggttaaacttaggcttaactatgttaccagcgctgttaccttaccctatgttattaaggctgggtaagcgtttaggttatttatattaccgtttgtcaggctcgcgtgtacatattgcccgggtgaatttacaaaagtgttttccagaaatgattgaagaacaaagagaaaaattattgcgaaccaattttcagtcggttggtatcggtattatggaggtcgctatggcgtggtggtggccgaaaaaaaggctagaaaagcatgtccgttttgaagggcttgagcacctacacgataaacaggggcgcggaacgatcttattgata…	MGYQNTTEADQFKGAFLHPRYWLTWLNLGLTMLPALLPYPMLLRLGKRLGYLYYRLSGSRVHIARVNLQKCFPEMIEEQREKLLRTNFQSVGIGIMEVAMAWWWPKKRLEKHVRFEGLEHLHDKQGRGTILLILHFTTIEIAGAMIALRQSLNATYRRHKNPVFEYMQRRQRLRHDRNSYLLERRDVRGMLRVLRSGGMIWYAPDQDYGPKQSVFAPFFGISSATVTGTARLAKIGKARVVPMVVTRQSGTTDYLLKVYEPWENFPVNKDLEDAKRVNRFIEQRIREHPDQYMWLHRRFKTRPAGEPSFYT
488	MAG14_125	MAG14_125_488	2852	17	20	50	10	20	17	21	53	8	4	0	0	2	20	0	242	RNA polymerase associated protein RapA	ataagcgacacagaaaccgaacagggcttgggcaccgtgctttccctcaacggccgtatggttaccctgttatttcccgcaaccacagaaatgcgggtctattccatcgacaatgcccctctttctagggtgcagtttgagcgagatgataaggtagaaagccatgagggctgggtaatgacggtaaccgatgttatcgacaatgagggcctactaacctataaaggagttttggaaaatggccaaagcaaagtactgactgaatcctgccttagtaattttattcgctttaacaaaccgcaagataagctgctagcaggtcagattgaccaaaacaatcattattctatacgttataaaaccctgcgacacaatgaacgtctgcgtaaatcatctacc…	ISDTETEQGLGTVLSLNGRMVTLLFPATTEMRVYSIDNAPLSRVQFERDDKVESHEGWVMTVTDVIDNEGLLTYKGVLENGQSKVLTESCLSNFIRFNKPQDKLLAGQIDQNNHYSIRYKTLRHNERLRKSSTRGLIGPRTSLLPHQLHIAQEVAQRHAPRVMLADEVGMGKTIEAGMILHQQLISGRASRILIVVPESLLHQWLVEMLRRFNLSFSLFDQERYQCINEDNPFDSEQLILCSLDFLCDNAKRRQQVLAAHWDLMVVDEAHHLVWSAEEPSLQYQCIEQLAAHIPGLLLLTATPEQMGVASHFARLRLLDPNRFHDLAAFQMAERSYEPVANAVRTLLESAQLTKQAQQHLIDFLGESCQPLLDQIEQGQPEHSQVAQHQLLRQLIDRHG…
489	MAG14_126	MAG14_126_489	203	0	0	0	0	0	1	2	2	0	0	0	0	0	0	0	5	hypothetical protein	atgcttgagctatctgttgacttaggcgaacgtagctaccctgtttttattggtaccgacctattaggtcaagccaagtatttaacgccttacattacaggtcggcaagtcgctattataaccaatcaaaccattgaaccgctctatttaaatacattaaaaagtagtcttaaagggtatgatctagccatagaaatactgcca	MLELSVDLGERSYPVFIGTDLLGQAKYLTPYITGRQVAIITNQTIEPLYLNTLKSSLKGYDLAIEILP
490	MAG14_126	MAG14_126_490	530	2	2	14	0	8	4	8	25	11	0	0	0	0	4	0	78	Shikimate kinase I (EC 2.7.1.71)	atgctcttgaaaaatatttacttcataggccctatgggaacaggaaagaccacaataggaagaatgctcgccaatgagctaaacgtagcatttatcgattctgatcatgaaattgaagcacgcagcggagcaaatatcccatggatttttgatgtagagggtgaagcaggctttcgacaacgagaaaaacaagtgattgctgacatgtgtgctaggcgagatattattatggcaaccggtggtggcgctataaaaagaatggataatcgaaaacagcttagatccagcggttttattgtctatttgcatacaccagtaagcgtgcaacttacccgaatagcaaaagataagcaacggcctttaatccagcaggtagatcgagaaaaagttttaactagc…	MLLKNIYFIGPMGTGKTTIGRMLANELNVAFIDSDHEIEARSGANIPWIFDVEGEAGFRQREKQVIADMCARRDIIMATGGGAIKRMDNRKQLRSSGFIVYLHTPVSVQLTRIAKDKQRPLIQQVDREKVLTSLLAEREPLYRELADLILDTDKLSPRKMINQIILTINANGVCNA
491	MAG14_126	MAG14_126_491	1445	5	10	32	4	28	19	38	80	18	0	0	0	0	4	0	238	Glutamate synthase [NADPH] small chain (EC 1.4.1.13)	atgtcaaaatttatgccccggacaccgaaaaatgatttccagtttatagatgtgggcagagaagagccactagaaaaaccgttgcaaatccgaaagcaaaagtttgctgaaatctatcagccttatgaggaacagcaggttggcaagcaggcagatcgttgtttgtcttgtggcaatccttactgcgaatggaaatgcccactgcacaactacataccggactggttaaagctgatagctggaggaaaactatttgaagctgctgaactatctcaccaaacaaatacattgccagaagtttgtggcagagtttgcccccaagacaagctttgcgaaggtgcctgtacgctcaatgatggatttggtgcagttacgatcggtgcaaccgaaaagtatatt…	MSKFMPRTPKNDFQFIDVGREEPLEKPLQIRKQKFAEIYQPYEEQQVGKQADRCLSCGNPYCEWKCPLHNYIPDWLKLIAGGKLFEAAELSHQTNTLPEVCGRVCPQDKLCEGACTLNDGFGAVTIGATEKYITDTALALGWRPDTSQVKWTTKKVAVIGAGPAGLGCADVLARNGVKPVVFDRNPEIGGLLTFGIPEFKLEKSVLQRRREIFVGMGIEFQLNTEIGTAISIEQLIKGYDAIFMGMGTYTAMKGGFPGETLPGVYEALPYLVSNINSRLGYDQNQENLIDMKGKRVVVLGGGDTAMDCNRTAIRQGALSVQCVYRRDEDNMPGSRREVIHARKEGVEFLFHRQPVAIVGDARVEGVKLMTTRMGQPDKDGRQKPELIENSEDIIKADAV…
492	MAG14_126	MAG14_126_492	4457	18	16	82	22	31	71	82	173	70	0	0	0	0	14	0	579	Glutamate synthase [NADPH] large chain (EC 1.4.1.13)	atgacatcaggtttttaccaacccgaagaatttaaagataactgtggtttcgggttgattgctcacatggaaggcgaaaaaacacatcaccttttgcaaacagccatcaaagcacttacctgtatgactcacagaggtggtatagctgctgatggaaaaacgggtgatggttgtggcttgctgatccagatacccgatggtttctttcggcaggttgtgcaagagcagctgagcaaaaagctacctaagcactatgcagtagggatgacttttttcagcaatgacactaaaaaagcgcttattgcaaaaaaatgccttgagcaatcattgatcaatcagtcgcttagaatcattggttggcgcaaggtgcctgttaatagccgttgccttggcccaata…	MTSGFYQPEEFKDNCGFGLIAHMEGEKTHHLLQTAIKALTCMTHRGGIAADGKTGDGCGLLIQIPDGFFRQVVQEQLSKKLPKHYAVGMTFFSNDTKKALIAKKCLEQSLINQSLRIIGWRKVPVNSRCLGPIALEQLPVIEQLFVGADDDVDDSLFAARLYMARRHANSELAADKDFYICSLSSKVICYKGLMMPVDLAVFYTDLADTRFKTSICVFHQRFSTNTLPRWQLAQPFRMIAHNGEINTITGNRNWAQARRHKFKSHLLEGLESIDPLINRTGSDSSSLDNMLELLVTGGLDLYRAIRLLIPPAWQNVDTMVPDLRAFYEYNSMHMEPWDGPAGLVMTDGRHAVCVLDRNGLRPSRWVVTRNGYLTVASEVGVHHYAPEDVVAKGRVGPGE…
493	MAG14_126	MAG14_126_493	149	4	0	7	0	1	3	1	8	2	0	0	0	0	2	0	28	hypothetical protein	ttgtggtttactattgctgtaaattacgatctgcttgactttaacaagctagctatgatcttttcaagcagcaagatgctacctcacctgcttgtatataaggcggccatcagagtagaagacgattttacacttatgccattgaagtag	MWFTIAVNYDLLDFNKLAMIFSSSKMLPHLLVYKAAIRVEDDFTLMPLK
494	MAG14_126	MAG14_126_494	683	2	3	11	3	2	10	5	19	7	0	0	0	0	4	0	66	Uracil-DNA glycosylase, family 1 (EC 3.2.2.27)	atgcaggatattaggctagaaccatcctggaaatctcggctgcagaatgagtttgccaagacgcatatgcaagcgctcaaggcatttcttgttaatgaaaaaaagctgggtaaggttatttacccaaaaggaagtgagtacttcaaggcgttaaacttagcgccttttgagcaggttcgcgtcgttattttaggtcaagatccataccataaccctgatcaagctcatggtttaagtttttcagtacgacctggagttaagattcctccgtcactgattaatatatataaagagttagaggatgaccttgctatcgcaccggtaaatcatggttgtttggagcactgggcgcaacagggtgtattacttttaaatagcgtactaacggtagagcataag…	MQDIRLEPSWKSRLQNEFAKTHMQALKAFLVNEKKLGKVIYPKGSEYFKALNLAPFEQVRVVILGQDPYHNPDQAHGLSFSVRPGVKIPPSLINIYKELEDDLAIAPVNHGCLEHWAQQGVLLLNSVLTVEHKQAASHQCRGWEQFTDRIIAELNEHKKHVVFILWGSYAQRKGKYIDHERHCVLKSVHPSPLSAYRGFVGSKPFSQTNNYLIQHNIKPIDWQLPTL
495	MAG14_126	MAG14_126_495	689	4	8	17	6	5	10	11	21	10	0	0	0	0	2	0	94	Transcriptional regulator, AcrR family	atggaaacaatgaacagcgctccctctcttgattctttgagtttgaaataccaaggacgtaaagcgagccgtattaatagcgaacagcgtagatgcgctatattagaagctgcgctaagaatcgttgtgcgagatggtgtgcgcggggtaagacaccgtgctgtagcaaaagaagccaatgtgccattgtctgcaacaacctactattttaaagatatttctgatttaattacggatacctttaccctattcgttgagatgggtgccaataaaataaatttattttggcaggaatctgatgaaaagttgagggcggcactggagctgcttaatgatgataaagagtctcgagagcagtttgtcgataagatgacagatttggccgtggattttgtcaaa…	METMNSAPSLDSLSLKYQGRKASRINSEQRRCAILEAALRIVVRDGVRGVRHRAVAKEANVPLSATTYYFKDISDLITDTFTLFVEMGANKINLFWQESDEKLRAALELLNDDKESREQFVDKMTDLAVDFVKEQLDNHREYLIAERSFQLECLRNGALRPIAFRHQRFVRDSLERFFKQLGSKEPRIDARLLIAVIMHVQYDAMVREQSVHTSDLRSVLRRHIELAVG
496	MAG14_126	MAG14_126_496	1361	0	0	2	2	4	0	0	5	3	0	0	0	4	2	0	22	hypothetical protein	atgaaacgattaatcaatacagcattgactttaggggttaccctttctagtttatctcccttatcgagcagtgctgactttctggaagacagtagcctcagtggtaaaataagaaccgtttattacgatgttaaaaagtctgatcgtgttgatgcagataacccggaccatccaaaacaaagcgcatcctatgcaggtgcttggaccagcagtgtggcacttgatgcaagttcaggctattggcgagatcttatcggtgtaaatgcttctttttatggcgttaccaaaattgatatgccagagagaaatggctcaaacagtaaagaactgctgaatgataataaagaaggatttagtaaacttggccaagcttttattaaattaaaagccggtgatgaa…	MKRLINTALTLGVTLSSLSPLSSSADFLEDSSLSGKIRTVYYDVKKSDRVDADNPDHPKQSASYAGAWTSSVALDASSGYWRDLIGVNASFYGVTKIDMPERNGSNSKELLNDNKEGFSKLGQAFIKLKAGDEENNAQLNAGRQLIYNALISSSTSRSVPSTWRGYNFNANIQGIHIGLAYVDQMSLRNQAGFHRLENFDGKHIDYIVGGQLDTTLNNFELRYRNAYSKGFLQAHNIKVGYTFDLGNNRNLSVDTRYYLTKKNGSLWTGYTNWKGPVTDNNYDPATAAFDDKAENITLNAELNIGAWELVGSIGYTSAKSTKTLGHYYYDFGKNTHGIFDSPISAFGEDFLYHNETAWKTGFFYDFSSIGVKALKAGYIFHYGSGMTANNGKAANEHEH…
497	MAG14_127	MAG14_127_497	182	0	1	4	1	0	0	0	2	2	0	0	0	0	0	0	12	hypothetical protein	atattgatgataaactcttctacaggcatgaccgataccgtctggatagtggttcgcacttctattttaggcggtagtcatgcctttctggctagattattaaaagtcacacatcaggtatggttgtatataaataatgaaattgtcgcccactttaatagagtctctttcacgactcgttga	ILMINSSTGMTDTVWIVVRTSILGGSHAFLARLLKVTHQVWLYINNEIVAHFNRVSFTTR
498	MAG14_127	MAG14_127_498	1061	20	5	26	4	8	11	7	28	2	0	0	0	2	5	0	125	N-acetylornithine deacetylase (EC 3.5.1.16)	atggctaatttgccagtaattaatgagctggcttactggttagataatatggggtttgactgtgaggttatgccacttttagaaaaaggcaaggccaacctcattgccaccctaggcaagggagccggggggctagttttagctggccacaccgatacagtgccctgtaatgaaacactctggcaacattctccattcaaactaatagaacagaataatcgattttatgggttgggcacatgtgacatgaaaggctttttttcattggccatcgaggcatcaaaagattttttaactgatgaattaaaggcgcctttaattatcctcgcaacagcggacgaagagtcatctatgaatggcgctagagcattagctaacgcaggaaagccaagcgctcgc…	MANLPVINELAYWLDNMGFDCEVMPLLEKGKANLIATLGKGAGGLVLAGHTDTVPCNETLWQHSPFKLIEQNNRFYGLGTCDMKGFFSLAIEASKDFLTDELKAPLIILATADEESSMNGARALANAGKPSARYAIIGEPTGMAPVYLHKGIMMERIRIVGESGHSSNPSLGRNAMETAHKVIEEILKYRNELTQRYNMPSFSIPTPTINLGCIHGGDNPNRICGNCDIDFDVRLIPGMDSQLIRSEITQRLQPIAEQDAVDLSVTELTKAIPPFNANTESDLVETCSKLTGYTAQSAAFTTEAPFFQQLGMDTVVLGPGDIDQAHQPNEYLSLDRINPTISLLKKLIKRYCL
499	MAG14_127	MAG14_127_499	503	17	8	27	2	21	27	29	45	10	0	0	0	0	15	0	208	Dihydrofolate reductase (EC 1.5.1.3)	atgaaagttgcaatgattgctgccgttgcagaaaataatgctattggcataaacaataaaatgccttggtacttgcctgacgatcttctctactttaaatcggttaccatgggtaagcctattataatggggaggaaaacatttgagtcgctcggcaaaccgcttccaggaagaacaaatattgtgatcacgcgagatcagcagtattgttgcgatggtatccgtgtggttcatagcattgaggatgcactgtctttagctgagaatatagccctagttgaaggtgtcgatgagttgatggtaattggcggtgcagagatttatcagcaggcattaccaaaagctgaacggctctatttaactcgtgtatatcaatcttttaatggggatgcctttttt…	MKVAMIAAVAENNAIGINNKMPWYLPDDLLYFKSVTMGKPIIMGRKTFESLGKPLPGRTNIVITRDQQYCCDGIRVVHSIEDALSLAENIALVEGVDELMVIGGAEIYQQALPKAERLYLTRVYQSFNGDAFFPEFNNSEWNEVSRCDKSTGDEKRLTYSYLVLDKK
500	MAG14_127	MAG14_127_500	1481	14	10	53	20	18	41	51	69	28	0	0	0	0	8	1	334	tRNA 4-thiouridine synthase (EC 2.8.1.4) / Rhodanese-like domain required for thiamine synthesis	atgaaatttattgtaaaactatttcctgaaatcacaattaaaagtccgccagtgcgtaagcgttttatcaaacagctgcgtaagaatatccgcaaaattataaaacgcgcggatgagcatattgatgtaacaggattatgggattatatagaagtcactaccagcagtaatgatgctgtagtggttgcagaagtaggcgatttgctcagccatatacctggtgtttgttattggcttcaagtggctgattacccaatagcggatatggacgatattctggaaaaggcactggctgtctatacggaagagctttctggcaaaacgttctgtgtccgttgtcagcgctcaggcaagcactcttttagctcggtcgatgttgagcgctatattgggggtggg…	MKFIVKLFPEITIKSPPVRKRFIKQLRKNIRKIIKRADEHIDVTGLWDYIEVTTSSNDAVVVAEVGDLLSHIPGVCYWLQVADYPIADMDDILEKALAVYTEELSGKTFCVRCQRSGKHSFSSVDVERYIGGGLNQKTKAAGVSLSNPDITVRIEIKQDRYFLIKQRREGLGGYPLGTQEPVLSLISGGFDSTVSSFLTMKRGIRTHFCFFNLGGHAHELAVKEVAYYLWSRFGSSHAVRFVTVPFESVVHEILENVDNAQMGVVLKRMMLRAATDIAKEMGLTALVTGEAVAQVASQTLTNLAVIDSVTDHLVLRPLATMDKQDIINLAAKIGTEQFVHNIPEYCAVVSKKPTTCARQDRIAAKEAKFDFGILKEAVNNRKIVFVNDIIADDLTREHV…
501	MAG14_127	MAG14_127_501	1403	48	47	165	28	53	100	127	255	75	6	0	0	7	31	0	942	Glutamine synthetase type I (EC 6.3.1.2)	atgtcaaaaacgcttaacctaattaaagagcatgatattaaatgggttgatatgcgctttacggataccaaaggcaaagaacaacacgtttctattcccagcagcgaggtggactgcgagctttttgaagtaggtaaaatgtttgatggctcttctattgcaggctggaagggcatcaatgagtccgatatgattttacttcctgaagatgccaccgctacgcttgacccgtttactgaagcttctacgctaaacttgcgctgcgatattattgagccagcaacgatgcaaggctaccaaagagatcctcgctctgttgctaagcgtgcagaagaatttctgaaatcaactggtattgcagataccgccttttttggcccagagcctgaatttttcgtt…	MSKTLNLIKEHDIKWVDMRFTDTKGKEQHVSIPSSEVDCELFEVGKMFDGSSIAGWKGINESDMILLPEDATATLDPFTEASTLNLRCDIIEPATMQGYQRDPRSVAKRAEEFLKSTGIADTAFFGPEPEFFVFDDVKWHIDISGASYAVNSEEAAWSSSASIEGGNTGHRPKIKGGYFPVPPVDSLHDLRASMCKAMEAQGLEVEVHHHEVGTAGQCEIGTKFNTLVKKADEIQVLKYAVHNVAHAHGKTATFMPKPLVGDNGSGMHIHMSLVKNSENLFAGDGYAGLSEAALYYIGGIIKHAKALNAFANASTNSYKRLIPGFEAPVMLAYSARNRSASIRIPYVNSPKARRVEVRFPDPTANPYLTFAAMLMAGLDGIKNKLHPGDAADKDLYDLP…
502	MAG14_127	MAG14_127_502	1514	10	8	31	16	14	15	12	32	24	0	0	0	4	0	0	220	ADP/ATP Translocase, NTT1	atgggcagtgatcctgtatttggtaaatggcggtcaaggttatggccagtccatggatatgagctgaaaaaagttatacccatggtgcttatgttttttctggtactttttaactatcagatcttacgcgatattaaagatgcacttgttgttacttctgaagggtccggtgccgaaattatcccttttctgaagttttggggagtgctgccaggcgctattttctttgttatgctgtatatgaagatgagtaacaagctaagtaagaaagcgctattttactcgtctgtgatgccatttgccctcttttttgccttctttcctttgctttatgcctttcgtcatacactacaccctgaagcttttgctgatcagttacagtctattttgcctcaaggc…	MGSDPVFGKWRSRLWPVHGYELKKVIPMVLMFFLVLFNYQILRDIKDALVVTSEGSGAEIIPFLKFWGVLPGAIFFVMLYMKMSNKLSKKALFYSSVMPFALFFAFFPLLYAFRHTLHPEAFADQLQSILPQGFMGLIAIFRNWTYSLFYIMSELWGSVALSLLYWGFANDTNKVSESKRFYPLFGLLGNLSLPAAGVIIIAAGQFRSVAAPDVDTWQLTLNWLMFAVVLGSLGIMALYWWMHRYVFTDSRFVNTEPKKNKKKRPHMGMIESIKYLASSKYLCLLSLLIVGYGFSINLIEVTWKNQLKLQYPDPSSYLEFMGIFTSITGIATIFMMLFVGGNVIRRFGWTVGALFTPIVLLITGTGFFICVLGGDAASGVVSLMGTTPLMMAVILGCAQ…
503	MAG14_127	MAG14_127_503	146	0	0	1	0	0	0	0	0	0	0	0	0	0	0	0	1	hypothetical protein	atgggcatgggcagccaaaatccagaacaaagcagaatgatgcataacagtaaggctattgctataagtccaatgcccttatggggttcgaatacccagcgcaataactcaattagaaaagatgactggcaccaaagcccttactag	MGMGSQNPEQSRMMHNSKAIAISPMPLWGSNTQRNNSIRKDDWHQSPY
504	MAG14_127	MAG14_127_504	1358	0	0	7	0	0	4	0	2	2	0	0	0	0	0	0	15	hypothetical protein	atgatgttatattcagtggcaagaaattttaagttaattagtatttttagtctgttaattatcatgcagtcttttgcaaatgatgattttaatatgcaatcatcatcttttggaaaaaaagatgatggtaaattagaagttaatttaatttgcttacctaataaaataggtcgaattttaattgtatcagatttaacatcacctaaatgcaatagagtttttagcaaccttaaaaggctgtttaagtcaaatagttctcatgaagtgaatacgtttgagggcatgttaccaactgatttttccatgcatatatcaagtggtgattatatatttattagttcatcctccaaaataagaaattatgaaaaaggttatatgccaagctacgctctttacaaa…	MMLYSVARNFKLISIFSLLIIMQSFANDDFNMQSSSFGKKDDGKLEVNLICLPNKIGRILIVSDLTSPKCNRVFSNLKRLFKSNSSHEVNTFEGMLPTDFSMHISSGDYIFISSSSKIRNYEKGYMPSYALYKKKGKGNRFKRLEIIDNSPTDEFIKEYIKEHAEAYFCDDEPVTTILIVPEKKLNEEVINDLFHGDHCFYSHKTSKYGKKRKVRNKKKPHNQDKLCMKIDLISTDDGCRGDVILLPKFLFDTPEDKNACSVVLGSINQCPSLEERFYLGLAGFGMNVTGIGEVVGCLEGYQEVDDKVGASAAAACYGMAAGHGISGVGKIGLGLQTMMTAAFCQQKNSVLKHAFQRTEQVGDGLTFASALYGGENLVAAIHAGDGAEVLPPVVGNLTL…
505	MAG14_127	MAG14_127_505	734	2	0	9	2	8	7	2	15	4	0	0	0	0	6	0	55	hypothetical protein	atggatgggttttataagaggatatcggatacttctagcgagtcaattccatcaaatgaacaagaaccttctgatggcaagggcaatggacgaattaaagtaatcgcccctgaacaaacctatctatcagctgctgataaaacagcttctgcttcatctccccccaccacatcgttgatgcaacgcaaagtcacttatttactgcaacagaagccttcacgtgaactatatatcaggagcggtgttaacccacaatcgacactcactcagctcacagatgaagaactgcctgtagattcctcgttgatattggcctataagtcgaaaggtcttggaacaaatttcaattgcaaggctactagcaaaaaagatcaaaagctcattgagtgtaggcattta…	MDGFYKRISDTSSESIPSNEQEPSDGKGNGRIKVIAPEQTYLSAADKTASASSPPTTSLMQRKVTYLLQQKPSRELYIRSGVNPQSTLTQLTDEELPVDSSLILAYKSKGLGTNFNCKATSKKDQKLIECRHLAYAFATGVFGEKIQEGKSVAKGQKFAGVDSLDKIANHPGILTDKQLKNTPIHHGIAKEAYYVAGQAVGLSIHQAAQQLSYEGDSKRYLVESENHVMALAIERLADSSFKLAF
506	MAG14_128	MAG14_128_506	143	0	0	0	0	0	0	1	0	0	0	0	0	0	0	0	1	hypothetical protein	gtgagcctatgcagtttgcgcctatgctctcaatttaaagtcacacatcaggttacaaccttactagtaatacccatcgtagatgctaactgttgtaatgagaatggcaaactgagtgttaggataaaacaaaatggcaagtaa	MSLCSLRLCSQFKVTHQVTTLLVIPIVDANCCNENGKLSVRIKQNGK
507	MAG14_128	MAG14_128_507	1316	0	0	0	2	2	3	2	16	2	0	0	0	0	0	0	27	hypothetical protein	atgataacgtcatcaataaaaatatggttatttattctgttatttgtttcattattatccgtaacagctcaaaccaatgcctgcctttttatagaggaagcagataaaaaaagagaagagttatctcaagagtattctgaaaaaaatatttcactcatagaaaaaataataaaacttaccagctggtataatcgtcagatcgaaatattagaaaaagaactgggaaaaccattcgttggtgatctagtgcgtgtggatttttcttggccactgaatgacgttgcctattcgatgttagctaaaattttaagtgacacttccagtgattttggtatgtatgctagtgattttgaaaatcaagcagcccgtttaaacgacttaaccccttttgatatgtta…	MITSSIKIWLFILLFVSLLSVTAQTNACLFIEEADKKREELSQEYSEKNISLIEKIIKLTSWYNRQIEILEKELGKPFVGDLVRVDFSWPLNDVAYSMLAKILSDTSSDFGMYASDFENQAARLNDLTPFDMLFGLNIQKFFIKRPYSLETFAEEKINNILSAFNKTMEEISDNNACQIEMHDSSLGYRIKIPPKELQDRFISYFPDNKGLAIKLCLHAMDWCLNNALNNKKLIIPDLKKFNDLILNYPEYNKIKGLVTRTHKQKSDVSYRMLKKYMKEDKSRPGSLSLYESALQGILQKLESIADGMKVGIISSESKQCSYHGGAFILTEEAIPPSTDLYVLQIVTCKYLTFNGDTLKKMSELCGRFFLVEAEEMKVSPIYGVIADFSILQDSPKIKI…
508	MAG14_128	MAG14_128_508	347	13	19	44	16	16	30	41	84	20	0	0	0	4	10	0	297	Uncharacterized protein YfgD, not an arsenate reductase	atgagtgtgactatttatcataaccctcgctgttcaaaatcccgacagacacttgctctgctggaagagaagggcattgatcctgagataattctgtatttagaaacaccgccaaatatagatacgcttgcaaaggtgttaacgcaattacagctatctccgagacaattactccgtacaggggaggaagaatataaaacacttggtcttaacgatttatcattatcggatgataaaattcttgccgctatgacaaagaaccctcgattaattcaaagacctattgtcattcataataatcaggccagaattggccgcccgccagagcaggtactggagattctttga	MSVTIYHNPRCSKSRQTLALLEEKGIDPEIILYLETPPNIDTLAKVLTQLQLSPRQLLRTGEEEYKTLGLNDLSLSDDKILAAMTKNPRLIQRPIVIHNNQARIGRPPEQVLEIL
509	MAG14_128	MAG14_128_509	188	2	2	18	2	9	24	3	25	9	2	0	0	0	4	0	100	hypothetical protein	atgcgacccagagcatctgcatggctgtgctttatcttatgcttttattttatcagtggcgtattagccatttgggtaatgccgactgatatccataattggctcatcatgttttgtgtgctactgctatttatcagtgcaatgttgtttactcgttggcaaggaaaatatgaccataggataaaatag	MRPRASAWLCFILCFYFISGVLAIWVMPTDIHNWLIMFCVLLLFISAMLFTRWQGKYDHRIK
510	MAG14_128	MAG14_128_510	716	6	4	29	12	10	22	3	29	10	0	0	0	4	6	0	135	DnaA inactivator Hda (shorter homolog of DnaA)	atgtcgtatatgagcctgcctgtgcaattaccacttggtgtccaattaagagacgacgtaacattcgccaacttttatggtggagctaatggcgccttagtcaatatgctagatatggataaaaccctacccggcgttgagaccgaacaatttatttttctttacggcaataaaggtgtgggctgtagccacctattgcaagctgcctgcaatcaggttgaccgccgtgatggtcgcagtatctacctacccatgtcggagctagtatattactcgccacaattattggaaggaatggagcgcttgcaattagtctgtattgacgatctaggtaaaattgcaggaatccctgagtgggaagaagctgtttttgatttatttaaccgtttgcgtgattca…	MSYMSLPVQLPLGVQLRDDVTFANFYGGANGALVNMLDMDKTLPGVETEQFIFLYGNKGVGCSHLLQAACNQVDRRDGRSIYLPMSELVYYSPQLLEGMERLQLVCIDDLGKIAGIPEWEEAVFDLFNRLRDSHTRFLVAAKHPPKNLGIKLPDLVSRLNWGLVYQVQPLNDTDKVAALQLRGHIRGLEINEEVARYIVYRSCRDMGKLFKILHKLDSASLRAKRKLTIPFVKQVMDW
511	MAG14_128	MAG14_128_511	1064	8	2	28	8	17	29	27	27	13	2	0	0	0	2	0	163	Putative permease often clustered with de novo purine synthesis	atgtccattgagcaacgctggattctgattgcaataacaatagttactgttttatttctctatctacttggctcagtattgacgccttttatgataagtatagtgttagcttatcttggtaatcctctcgtgttgcgtttagagttgttaggggtatctagaaccctgtcggtctctgttgttttttttgttcttgccctcgtgatcatcaccttactgctagttgttatcccactggtatttcagcaactaaaatctttgattcaattactgcctgatttaggaatatggctgcaagcgaatgtgtggcctttgctacagaaatatctaaacgtaaattcaagcctatttgatctcaaccatattgcaacagtgttaaccgcaaagtggcaaaaaacc…	MSIEQRWILIAITIVTVLFLYLLGSVLTPFMISIVLAYLGNPLVLRLELLGVSRTLSVSVVFFVLALVIITLLLVVIPLVFQQLKSLIQLLPDLGIWLQANVWPLLQKYLNVNSSLFDLNHIATVLTAKWQKTGGLIALLSSSATRSSIALFNFLANLFLIPVVTFYLLRDWKRLISHLRSLLPRRIEPKAMILAKECDGVLGAFLKGQLMVMLSLGLIYSVGLGLIGLKFAILIGLLAGLVSIIPYMGFIVGFSMALITALFQPDNNWLLVGVASVFIVGQALEGGFLTPNLVGDSLGLHPVAVIFSLMAGGQLFGIVGMLIALPLAAVIVVFLRHFHRNYKESLFYHAKSHE
512	MAG14_128	MAG14_128_512	1103	14	4	27	6	10	25	25	38	6	0	0	0	0	2	0	157	hypothetical protein	atgtattctaaagaattgatgaaagaccaattaacaaaagggtttatagcgcttgctctcgtagtgagcgctatgttacccatttactcaaaaacagtgcaagctcaacaagtggctggcttatataaggcggaagaagccgttcaatcccagtcagatgaagtaaaacaggaagcaatgaagcaagcttttgaggaagtcttaatcagggttacaggcgaaaccaaacaccttgaaaacagcacgctgaaggaggccctaaatacccccgacacgtatgtaaaagggtatagttatcgtcgagatactgtaggggcaaaacaattatatttagatattacattcgaaccagaagccgttaatcgcctactaagatcagcagggctgcctatttggggg…	MYSKELMKDQLTKGFIALALVVSAMLPIYSKTVQAQQVAGLYKAEEAVQSQSDEVKQEAMKQAFEEVLIRVTGETKHLENSTLKEALNTPDTYVKGYSYRRDTVGAKQLYLDITFEPEAVNRLLRSAGLPIWGGNRPTTLLLLAIDQDGERSIQADNSTDQVVQGFDAQFKKRSLPLIFPLMDVKDTSLVSPVDVWGFFISNLTPISKRYHADAILVGRLSENQGIYDGRLVFSFRNQPLKEATVTDLNIAQLALVAADLAGSALANHYAVASLDSQDSRLLVEQVKSFKDYSDLLNYLNKLTAVRSVQVRRLAGSTIELDLRIDGQRNQLIDTIALGRHLKPKDNGSIENLTNIQQGELHYRWIRR
513	MAG14_128	MAG14_128_513	803	20	8	32	8	7	16	18	28	18	0	0	0	2	2	0	159	hypothetical protein	gtggctgcattaataaaagactatgagcgaaattactatcagagcgggtttatacagctagatgcagcaaaatatctcatcgattttgctaaaccttatgttcgctgcggaagtagtctccttgatgtcgggtgtgggtcgggtagggtgacaaaccttatctttgataatcttttgccttcgaaggtgataggggtagatcaggccgatggtatgatagcgctagctaagaagtcgacacgcaataagctgatttgctataaacatcatgctatagaagattaccctacagattttcgcttcagtcatgtttttgctaactcgtcttttcagtggttttctaactacagcgcagcactatctactatccaccattgtctatcacctgatggttatttt…	MAALIKDYERNYYQSGFIQLDAAKYLIDFAKPYVRCGSSLLDVGCGSGRVTNLIFDNLLPSKVIGVDQADGMIALAKKSTRNKLICYKHHAIEDYPTDFRFSHVFANSSFQWFSNYSAALSTIHHCLSPDGYFFIQSSYKERWCPEFLDIIESLKLQHSFINDLLSQHHFPCMHLASPQEYTTFLLGHRFSVTSIETKDFVYQLPQERAIDVFNSGPVKAYTSEKYYNNAVDPQAIDKFYSFFQLALAKKKKIQITYPRVFIRCQPQ
514	MAG14_128	MAG14_128_514	890	11	2	13	4	2	1	34	15	4	0	0	0	2	0	0	91	hypothetical protein	atgagtccatctgtagtagcgagtgtatcactaagcagaacagcgagtacacaaagcaatggatcagcacgttctaaacaacctacagcctttggcaaaaaagtccaaagccttgttggagaaaaaggcatttttagaacaacagctaaatttgcaacatctaagcctgctagaactgctctgaaaggtattaaagggcttgctggaaatatcggtagagcagttgccattattgctgttgtgccatttttaacggtagcaggattagtcgaaggcagtgttcggggggtgcttaatgcttatcgttcaagcgctacgggaacagtcgtagaaacagtcaagtcagcggtgcatgctgttcagcattacctgcgaaacgagggggaaatcgaagtggag…	MSPSVVASVSLSRTASTQSNGSARSKQPTAFGKKVQSLVGEKGIFRTTAKFATSKPARTALKGIKGLAGNIGRAVAIIAVVPFLTVAGLVEGSVRGVLNAYRSSATGTVVETVKSAVHAVQHYLRNEGEIEVEAEKYLVNLCTSDQADVLRKSIEKYNNALCSLTLARSDVRHYNCNGLNSQEKRNVMAKAKKSEKHASKKFDDAKNKLENEISSILKGIKTRRDKVKTDAEKQMKTFTGTPVATYMSNSKQRHDFKKYIMHXXXXXXXXXXXXXXXXXXXXXXXXXXXXXXXXXX
515	MAG14_128	MAG14_128_515	593	21	2	40	16	7	36	12	22	15	0	0	0	0	11	0	182	Electron transport complex protein RnfA	atggaacagataaatcaactggcgctgattatggtcagcgccatactgatcaataattttgtgctggttcgatttcttggcctttgcccttttatgggggtttctaataagctagaatcggccatgggtatgtcgttggcaacaacgtttgttttaacgcttgcctcaatttgtagctatctggttgatcggtatattctcacccctttagggttggagtttttgagaacaattgcttttattctagtgattgccgttgttgttcagtttactgagatggtagtgcgcaaagttagccccttattacacagagtcctcggtgcttttcttccgctcattacaactaactgcgcggtactaggtgtagccctgctcaatagcaaccggcttgatagcacg…	MEQINQLALIMVSAILINNFVLVRFLGLCPFMGVSNKLESAMGMSLATTFVLTLASICSYLVDRYILTPLGLEFLRTIAFILVIAVVVQFTEMVVRKVSPLLHRVLGAFLPLITTNCAVLGVALLNSNRLDSTLAYSATYGFSAAVGFSLVLILFSAMRERIAAADVPTPFRGTSIGMITAGLMSLAFMGFTGLIKM
516	MAG14_128	MAG14_128_516	599	4	0	10	10	0	9	12	9	9	0	0	0	0	5	0	68	Electron transport complex protein RnfB	atggagattattttttatgccattggtgcgctattagcgctgtcacttgttttcggtgctctattagggtttgctagcgtacgatttaagacacagggcaaccctattgttgatcaaattaatgacctgctaccgcaaactcagtgcggccaatgcggccatccagggtgccgcccttatgcaacggcaatagccaatggtgagcccattaacaagtgccctcccggtggccaagccactattgatgcattggctgccttactggatgtcacaccagagcctctggatgcagaacacggcgtagaaacggaacctcgggttgcttttattcgcgaagaggagtgcattggctgcacaaaatgcattcaagcctgccctgtagacgctatcttaggcgca…	MEIIFYAIGALLALSLVFGALLGFASVRFKTQGNPIVDQINDLLPQTQCGQCGHPGCRPYATAIANGEPINKCPPGGQATIDALAALLDVTPEPLDAEHGVETEPRVAFIREEECIGCTKCIQACPVDAILGAAKQMHTVIADECTGCDLCVAPCPVDCIDMIPLEVTTKNWSWTLPQAQQPLIVTDRHPLKISEEGTA
517	MAG14_128	MAG14_128_517	1130	2	0	19	0	6	10	8	21	4	0	0	0	0	8	0	78	Electron transport complex protein RnfC	gtgagcactcttattaaaacctttccaggtggcgtttatcctgaagccaataaaaagcagtccacgcatacacccatcgcctgcttaccgctgtttaaacactatgttttgccactgaatcagcattctggcacaccggcaaaaccactggtttccgtaggcgataaggtacttaaaggacaactgctggcacgagcagaccgttttgttagtgcccccgttcatgcgcccacatcaggcactatcactgcgataggcccccatagtgtacccagcccttctggcttgaaagatacatgcataatactaaacagcgacggtgaagaccgctggtgtcagcttactcctacgcctaactatcaacttattagtacagatatattggttgagcggatctac…	MSTLIKTFPGGVYPEANKKQSTHTPIACLPLFKHYVLPLNQHSGTPAKPLVSVGDKVLKGQLLARADRFVSAPVHAPTSGTITAIGPHSVPSPSGLKDTCIILNSDGEDRWCQLTPTPNYQLISTDILVERIYAAGIVGLGGAGFPTAVKMASRSEKKIHTLIVNGAECEPYITADDMLMRERADNIIHGIDILCHMLHLECVLIGIEGNKPEAIQSMEKACKERPWQVVSIPTKYPSGDAQRLIYTLTGKEVPNDARSVEMGFLCYNVGTLAAVADAIIEGKPLISRITTLTGAALKYPQNVEAPIGALANELLRFAGINEEALYHLVLGGPMMGFSLDNTAIPVIKTTNCYIAATKKEFPPATPAQPCIRCGICA
518	MAG14_129	MAG14_129_518	161	1	1	5	7	10	0	5	13	0	0	0	0	0	0	0	42	hypothetical protein	gtgagcctatgcagtttgcgcctatgctctcaatttaaagtcacacatcaggtgcatacttataaacaatataaagttattaatgctttagtatgttataaatttttttcgagaaaagtcatgcgcataggctcaacaagctactgtgctatctggcgctga	MSLCSLRLCSQFKVTHQVHTYKQYKVINALVCYKFFSRKVMRIGSTSYCAIWR
519	MAG14_129	MAG14_129_519	320	10	20	33	17	12	17	4	11	18	2	0	0	0	2	0	147	hypothetical protein	atggaaactaagcgtgtattaaaagcgatattaaacgtattttctgtagtacctttgtttgtagtgggtctaatggctatgggtttagcgccgttgacggttgcagaagaaaatatatcttcacctgtacctactattgatgagcagaatgatcatgacgaagctaaagatttagactataagctaaagctttctacaacgaatgatgagaaacaaactgttgaagaatcaggcgatgaagaatatagcattcagttatctgcaaataatgattcagatgatatgcattcagatgaagacgaaaaaagcacagcgagttag	METKRVLKAILNVFSVVPLFVVGLMAMGLAPLTVAEENISSPVPTIDEQNDHDEAKDLDYKLKLSTTNDEKQTVEESGDEEYSIQLSANNDSDDMHSDEDEKSTAS
520	MAG14_129	MAG14_129_520	1676	0	0	2	0	4	1	4	0	2	0	0	0	2	0	0	15	hypothetical protein	atgaatactgataaaataccgccaaagcactcaccgactcatgcaaacaatgatgttaatacccgttcaatagaaagtgatcatgctcaatatgatggaagagctgtttcattaacggatataccctcccctgcttccacaaatgatccagagttaaccaagccaacccctgaagccattgccctaatgaatcgaaagctagaacggttagctgaagaagaccctgcgcgcactatttataagcgccactatactcgtcaagatgcaaaactagagttagccgccaatacaacgttaaagcttgaagaccctgctatcattgcatacatgtcgaaaggaaattatataaatctaaaccaggaagccatcggtcataaggataaccagcctattgaatgc…	MNTDKIPPKHSPTHANNDVNTRSIESDHAQYDGRAVSLTDIPSPASTNDPELTKPTPEAIALMNRKLERLAEEDPARTIYKRHYTRQDAKLELAANTTLKLEDPAIIAYMSKGNYINLNQEAIGHKDNQPIECRHLADAFVTGVFGHKNKLGEPSSASSISSGENNNRPIDNEQPKKRKNIGGKFLSISTAEKIAAHPSIKTTKELDGLTPDNGDGVAEKAYYFSGIAIGHSLYKIALQCLNTGDSQGWVLNSATHAMGLMVEHQKEGTFQLVFYDPDDSLRVWRLTVPNREALKMVTLNDLIPNPADLNQNFFGPDYSGVLRSTNTIENANEATVELDGDVNPSLINQLMGEGHLGKKDIATRIKPHFNKSKELIEAEVNGATGVYFAMQNGHFRALN…
521	MAG14_129	MAG14_129_521	302	0	0	0	2	0	0	0	0	0	1	0	0	0	0	0	3	hypothetical protein	ttgtttaacaacctaaaagcatttggtatcgataagaatgacccagaggacaagcaatggctaaaaaattgggttataaagccaagagataatggtactacgggtttattccttgctttagcttctaagcacatcaaggccattcaagttgtaattaatcaattaaaagcgtttgatctcttaagtgacaatacatttagagccgatttaattaaggcattcaaatccagtgggcctattacgctatctgaggaagaacagaagcaatatgatgatatcattgagagcctactatctggttaa	MFNNLKAFGIDKNDPEDKQWLKNWVIKPRDNGTTGLFLALASKHIKAIQVVINQLKAFDLLSDNTFRADLIKAFKSSGPITLSEEEQKQYDDIIESLLSG
522	MAG14_129	MAG14_129_522	998	18	8	22	11	15	39	32	53	14	4	0	0	2	28	0	250	Peptide chain release factor 2 @ programmed frameshift-containing	ttgcaggaagttgagcgagaattagaagaccccgtggtttggaataacccagataatgctcaagcattaggacgtgagcaatctcaacttagatccgtagtgcagacgattgatgcactaacacaaggcattgtcgatgctaaagagcttctggaaatggccgtagaagagtctgatgaagagggcgttaaaggcgttatcgatgagttaaatcaactatctgaacaattagaattattggagttccgacggatgttttccggcgaaatggacttaaacaacgcctatcttgatattcaagcaggttccgggggtactgaagctcaggactgggcaaatatgctactgcgaatgtatttacgctggggagaggcgcgcggctttacgaccgaactgatt…	MQEVERELEDPVVWNNPDNAQALGREQSQLRSVVQTIDALTQGIVDAKELLEMAVEESDEEGVKGVIDELNQLSEQLELLEFRRMFSGEMDLNNAYLDIQAGSGGTEAQDWANMLLRMYLRWGEARGFTTELIEVSAGDVAGIKSATVQFSGDYAFGWLRTETGVHRLVRKSPFDSGNRRHTSFASVFVSPEIDDKIDIEINPADLRVDTYRSSGAGGQHVNTTDSAIRITHNPTGIVVQCQNQRSQHQNRDKAMQQLKAKLYELEMQKRSADAQALEDSKSDIGWGSQIRSYVLDDARIKDLRTGVETRNTQVVLDGDLDRFIEASLKKGL
523	MAG14_129	MAG14_129_523	1496	24	33	82	20	20	56	37	97	24	0	0	0	10	38	0	441	Lysyl-tRNA synthetase (class II) (EC 6.1.1.6)	atgtctgatcaacagcaatttattgatcctcaagacgaaaataaactgatcgctttacgtcgtgaaaaactgtccactattagagctgagcgagttgcttttcctaataagtttcgccgtgactcccttgctggtgatttacaagcgcgttatgaaaatgctaccaaggaggatttagctgagcaaggtatcagggtcagcatggctggacggattatgctaaaccgtggtgcctttatggaaattcaggatatgtctgggcggattcagttatacctaaaccgcaaggtattatccaaggctgaactgaaagaaatcaaaacctgggatctgggtgatattgttggtgttaaaggcatactgcaacgctcaggtaaaggcagcctgtatgttgatatg…	MSDQQQFIDPQDENKLIALRREKLSTIRAERVAFPNKFRRDSLAGDLQARYENATKEDLAEQGIRVSMAGRIMLNRGAFMEIQDMSGRIQLYLNRKVLSKAELKEIKTWDLGDIVGVKGILQRSGKGSLYVDMAQAQLLTKSLRPLPEKHKGLTDTEQRYRQRYVDLITNEESRNTFQVRSDIIHCIRDYFHSEGYMEVETPMLQVIPGGATAKPFITHHNALDMDMYLRIAPELYLKRTVVGGFEKVFEINRNFRNEGLSTRHNPEFTMLEFYQAYADYNDMMDHTEALLKKLAQDVIGKTTINYQGQTLDFGRPFARMSVFDAILHYNPDLKAADIDQIGPAKAVADKLGIEVKPTWGLGKIQIELFEATAEHKLINPTFITDYPTEVSPLSRKRDD…
524	MAG14_129	MAG14_129_524	833	4	2	10	4	4	8	15	19	2	0	0	0	0	4	0	72	Deoxyribose-phosphate aldolase (EC 4.1.2.4)	atgacggcctcgtccacacccagcaatgctttgcttgtcgatcaactaggtattattcaaatgagtattgaacaaaactatagccaattggcgctgaagttaatggatctgacagcattgagtatggatgataccaatgaaacaattatagatttgtgtgataaagccacaacagcagcaggttctgttgcggcattgtgtatttaccctcgctttatttccattgcaaaggaaaggctatatgaactgggtttagctgatctgaaggtggctacggtaactaattttcccgatggtggtgatgatattgagagtgccgtaatggaaacctattctgcaattaatcaaggggctgatgaagtggatgttgtattcccttaccgaaccttgatagcaggt…	MTASSTPSNALLVDQLGIIQMSIEQNYSQLALKLMDLTALSMDDTNETIIDLCDKATTAAGSVAALCIYPRFISIAKERLYELGLADLKVATVTNFPDGGDDIESAVMETYSAINQGADEVDVVFPYRTLIAGDETAGVELVRECKAVCGDNIILKVIIESGELKTPKLIRQASDLSIEAGADFIKTSTGKVAVNATIEAAQIMLTAIKESRVDVGFKPAGGIRTAKDAKEHLQLAENIMGRNWINPQHYRFGASGLLNNLLIDLGINEDNIDTTSY
525	MAG14_129	MAG14_129_525	1259	2	7	16	0	8	10	20	43	12	0	0	0	2	0	0	120	Na+/H+ antiporter	atgcacgaaactaacctggctttatccgtgctaatattttccggcttatttatgttagcaacttgtgcagctattagccttagagcattacgcataccttataccattggacttgttgttataggtatcgcccttggcttgttggcacctcattcagtatttctcgcacctattcttaaggttcatttaacccatgacctcatcatgtacgtgctattacccgtattaatttatgatgccgcactgaatatcaaattacccatgctatgcaatgagctaatacctgttttgctgttagctatcgttggcgttgtcttatcagttttgattgtttcagggctgctgggttatttaacaccactaaccatgaccggagccttactatttggtgctttgatt…	MHETNLALSVLIFSGLFMLATCAAISLRALRIPYTIGLVVIGIALGLLAPHSVFLAPILKVHLTHDLIMYVLLPVLIYDAALNIKLPMLCNELIPVLLLAIVGVVLSVLIVSGLLGYLTPLTMTGALLFGALISATDPVAVIALFKEVGAPERLSLLMDAESLFNDATAIVVFGIVMTVIQTGNGVNNGNLLVSAVWDFFRVFVGGGIVGALLGFGTSYLLRLGRNIPFVQISHTTILAYASFILADHLLGVSGVMSTIAAGLVTRAYSTKVLSEPVQKYLSPYWAFMSFVANSFVFLLLGMQEDILFQDLDKYHGHIAFLLLAISAVLMARLLVVYLLIPVSNRLPKSPFVDNATKAVMFWGGLRGVVPVALMLSIPVDIPERNIVIHMTLAVILFSL…
526	MAG14_129	MAG14_129_526	1484	10	9	25	22	22	57	51	103	24	0	0	0	0	8	0	331	Glutamyl-tRNA synthetase (EC 6.1.1.17) @ Glutamyl-tRNA(Gln) synthetase (EC 6.1.1.24)	atgaccattcgcaccagagtagctccctctcctactggtgacccccatgtgggaaccgcttatattgcattgtttaatatggcctttgcgcacagtcaaggcggccaatttatcttacggatagaagatactgatcaggttcgcagcacggctgaatctgaacgccagattctcgactcattaaaatggctaggactaaactgggatgaagggcctgacttaggtggcgccaatggtccataccgtcaaagtgaacgccgagagatctatgatcaacatgctaaggtactgctagacaaaggccatgcttttcattgcttttgctcacctcaacgtttagacaccctacgtgctgagcaaatggctaataagcaaacgtctggttatgatggccattgt…	MTIRTRVAPSPTGDPHVGTAYIALFNMAFAHSQGGQFILRIEDTDQVRSTAESERQILDSLKWLGLNWDEGPDLGGANGPYRQSERREIYDQHAKVLLDKGHAFHCFCSPQRLDTLRAEQMANKQTSGYDGHCLHLTEDQIQHKLTAGEPHVIRMKVPDSGVCTINDMLRGTIEIDWPQVDMQVLVKADGMPTYHLANVVDDHLMKITHVIRGEEWINSAPKHKLLYRYFGWDMPVLCHMPLLRNPDKSKLSKRKNPTSITYYRDAGYLPEALVNYLGRMGWSMPDEQEKFSLDAMLENFDISRVSLGGPIFDQEKLSWLNSRWIKEELTVQQFAERLQNWLFNKEYAMKFLPFVKERAERFSDVAPMSFFMLAGLLDLSAEHFVHAKLAQEDVKKILQ…
527	MAG14_13	MAG14_13_527	140	1	0	0	1	0	1	1	4	0	0	0	0	2	1	0	11	hypothetical protein	atggcgcgtgctatagctccattgctagtatcccgaacactagtactatatgatttaatcctgaatactgggttggttaccgttatatatgaagttcttttaaaagctttttccacagattttgcagtaaaagcgttgtag	MARAIAPLLVSRTLVLYDLILNTGLVTVIYEVLLKAFSTDFAVKAL
528	MAG14_13	MAG14_13_528	530	0	0	0	2	13	1	0	2	0	0	0	0	16	0	0	34	hypothetical protein	atgaagctaaaattcagcattttttctgtctttatctctttgttactaacgctttcttattatgctcatggagatgatgaagatactaaaaatattttgttaattgattttacaagcgttgcagataaaaattctggagaagttgcagctaaaaaatatggagaagcagtaactgaaaaagaacagattttttttaaaagagcggcgctttttgctgaaataagatccgcatttaaggctaaagttagcgaaattgctcaagatagaggtatacctgaagataaggctaagctttgtttttatacgcaaatgcctaatagaacgtttgttgagcttggctcagacgatgaattatctagtaattgttttgaaaatgagtttatagaagctccattaatt…	MKLKFSIFSVFISLLLTLSYYAHGDDEDTKNILLIDFTSVADKNSGEVAAKKYGEAVTEKEQIFFKRAALFAEIRSAFKAKVSEIAQDRGIPEDKAKLCFYTQMPNRTFVELGSDDELSSNCFENEFIEAPLIAKGFDCNKLLVEGESHDRSLINDILSLVATVVADIIDLISKNS
529	MAG14_13	MAG14_13_529	719	0	0	2	4	4	2	0	4	2	0	0	0	2	2	0	23	hypothetical protein	atgagcgttaaatttaatatttcatccgtttttatctctttattagcaatattttcatattatgcctatggggataaacctaaatacagtgtatatttagcagggcctgatgtttttctacagaaccctattaatgtaggagaagaacttaaaaataaaataatagcattttcaaatcaatgggtaaaagataaaaaatatgatgaacttccttttgatttagatcttaaatatcccatggatagtaatattgattctagtaacaatagtgtacctaataaaaaaatggcggcagatatatataatgccaatattaagatgatggacgcatctcatattatgttggctaataccacaaactttcgagggcctgagatggacactggtacagcctttgag…	MSVKFNISSVFISLLAIFSYYAYGDKPKYSVYLAGPDVFLQNPINVGEELKNKIIAFSNQWVKDKKYDELPFDLDLKYPMDSNIDSSNNSVPNKKMAADIYNANIKMMDASHIMLANTTNFRGPEMDTGTAFEVGYMSGIKKPVFAYFNTQPFWGKSFDISNYLDRVKQMMKLNKESVKDKYSVSIENFGTVHNIMIDCSVKNITTELRDAVNSALDYLDGEYQKSISSHSGPTPYANL
530	MAG14_13	MAG14_13_530	308	0	2	2	0	0	1	7	12	10	0	0	0	0	1	0	35	hypothetical protein	atgaaatacgcaagaaaagtcatgatactactaaccgtgcttggttactctagtttagcattggccaacgaaaattaccgttatgaatgccactccaaacaaaacactaacaccattgaagttgactatttactaagagaaaaaccccttccctgcgaaataaaatattttcaaaatagcaccgaagaaaccctatggtatgcccactatacacaagggtattgtgaggcaaaagcaaacgaactagctgaaaacttgaaagctaaagggtggcaatgcaaaagaattcctaatccagaaatcaagtga	MKYARKVMILLTVLGYSSLALANENYRYECHSKQNTNTIEVDYLLREKPLPCEIKYFQNSTEETLWYAHYTQGYCEAKANELAENLKAKGWQCKRIPNPEIK
531	MAG14_13	MAG14_13_531	1964	4	0	18	2	2	16	13	35	6	0	0	0	0	3	0	144	DNA topoisomerase III (EC 5.99.1.2)	atgagactaattattgcagagaagccaagcttgggcagagctattgctgatgtactgcctaagccacaaaaaaagcaacacggatatattgaaactgctagtggcgattgtgtcacttggtgtctaggccacttgctgacccaagcagagccacaggcatatgatccggcgtttaagcaatggcaattggcccacttacctatcgtgccaaagcaatggatattgctacctaaaaaaagtagtaaagcacaattagccatcattaataaattactgaaacgagcggatattattattcatgctggcgatcctgaccgagaaggacaactattaatcgatgaagtacttgattttttaaaattaacacctgcccgtcgtcaatccgtttaccgtctgtta…	MRLIIAEKPSLGRAIADVLPKPQKKQHGYIETASGDCVTWCLGHLLTQAEPQAYDPAFKQWQLAHLPIVPKQWILLPKKSSKAQLAIINKLLKRADIIIHAGDPDREGQLLIDEVLDFLKLTPARRQSVYRLLINDLNPQAVKKSLASLQPNTHFIPLSVSALTRSRADWLYGINLTRAFTLLGRKEGYNGLLSVGRVQTPLLGLVVKRDIDIETFQIKPFFEVIAVLETDNKEPFQAKWIPSESCQQWLDEDGRLLDKRLALNVIKRIQGKKGTVILAEYKSCKERPPLPYSLSALQIDAARQLKMSANQVLEICQNLYEQKFITYPRSDCRYLPKAHFNQAPDVLTAIRHNYQPLIQAVDKALPNKPGRAWNDKKISAHHGIIPTSRRATTANLTSE…
532	MAG14_13	MAG14_13_532	287	2	3	6	2	0	0	1	2	2	0	0	0	0	0	0	18	Mobile element protein	ctgatagaaggcttcagcgctgactatgtattagccgataagggctatgactctgatgcttttatcttttcgatacgtagcacaggagctaaacctgttattcctcaaagaaaagggaggttatccccaagagattatgatcgagagttatacaaagaacgtaatctagtagaaaggttatttcaaaaactgaagcatttccgcagggtcgcaacaagatatgagcgactgggccgtaattatttgggcatgcttcagctagcggcttccttaatttggctcgcctaa	LIEGFSADYVLADKGYDSDAFIFSIRSTGAKPVIPQRKGRLSPRDYDRELYKERNLVERLFQKLKHFRRVATRYERLGRNYLGMLQLAASLIWLA
533	MAG14_130	MAG14_130_533	173	14	2	4	2	2	5	2	9	0	0	0	0	0	0	0	40	hypothetical protein	atggtcatggcaacattacccatgtccattaagatggacaccaaaaaaacagctcaaactgatgaggcggttggaaaatcaagaggcggcttaacgaccaaaatccacgcagctgttgatgctttgggaaatcctgttcccctgaacataaccgctggtcaggcttcaggctaa	MVMATLPMSIKMDTKKTAQTDEAVGKSRGGLTTKIHAAVDALGNPVPLNITAGQASG
534	MAG14_130	MAG14_130_534	263	20	7	20	3	4	3	8	22	4	0	0	0	3	1	0	95	hypothetical protein	gtgttagttgataagggctatgactctgatgcttttatcttttcgatacgtagcacaggagctaaacctgttattcctcaaagaaaagggagactatccccaagagattatgatcgagagttatacaaagaacgtaatctagtagaaaggttatttcgaaaactgaagcatttctgcagggtcgcaacaagctatgaacgactggggcgtaattatttggccatgcttcagctagccgcttccttaattggctcgtctaattga	MLVDKGYDSDAFIFSIRSTGAKPVIPQRKGRLSPRDYDRELYKERNLVERLFRKLKHFCRVATSYERLGRNYLAMLQLAASLIGSSN
535	MAG14_130	MAG14_130_535	1637	27	38	100	28	46	81	120	232	56	0	0	0	6	22	0	815	Phosphoenolpyruvate carboxykinase [ATP] (EC 4.1.1.49)	atgaaccagtcgctagtacccaataaaatgcatgtcgacgcccttgctagtcttggactcaatcagattcaagaaattgtttataatccgtcgtatgaagaattatttaaagaagaaactaaagcagaattgcaaggatttgaaaaaggatcagtaacggctttgggcgctgtagctgttgacactggcatttttaccggacgttcgccaaaagataaatatattgtcaaagactcggtaacctctgaaactgtctggtggtctgaccaagggaaaaacgataataaagccattgctatagaggtatgggatagtctaaaaaaattagttactgatcagctatcatgtaaaagactttttataatagacggctattgtggtgcaagcatagggagtaga…	MNQSLVPNKMHVDALASLGLNQIQEIVYNPSYEELFKEETKAELQGFEKGSVTALGAVAVDTGIFTGRSPKDKYIVKDSVTSETVWWSDQGKNDNKAIAIEVWDSLKKLVTDQLSCKRLFIIDGYCGASIGSRLKVRFITEVAWQAHFVKNMFIRPESSNIENFDPDFIVMNGAKCTNPNWREQKLNSENFIAFNLTENIQLIGGTWYGGEMKKGMFSVMNYLLPLKGMASMHCSANVGQKGDVAIFFGLSGTGKTTLSADPKRALIGDDEHGWDDDGVFNFEGGCYAKTIKLNKDSEPDIYNAIRRDALLENVVVDEQGHINFDDGSKTENTRVSYPIYHIENIVKPVSKAGHAKKVIFLTADAFGVLPPVSKLSAEQTQYHFLSGFTAKLAGTERGV…
536	MAG14_130	MAG14_130_536	458	0	4	15	3	8	12	6	6	2	0	0	0	0	0	0	56	hypothetical protein	ttgagtcttttgcaatcattgtggcaagcattgcctcagctatcaggttatgagttggtatcactatcaggtagatgctcgaaggcgcgctggcaaggcaaaggagagggggctgtcattcctgacgccatctcagcgagtcattgttacataaaagagcgaggtgtttttatacttgaaaacggcactgagctggaaagtcataatgaatggctttggcagaaactaccagatcgtgtccgccttttccatgtcagaagaggacgtgattcgcccgttgaattgtttgagcttcacgaagacgtagactcaaatacactaaggtctatctcgcctcatttatgcggagaggatgtttatgaagcaacggtttggctaatcaatacaaatgtgcatatt…	MSLLQSLWQALPQLSGYELVSLSGRCSKARWQGKGEGAVIPDAISASHCYIKERGVFILENGTELESHNEWLWQKLPDRVRLFHVRRGRDSPVELFELHEDVDSNTLRSISPHLCGEDVYEATVWLINTNVHIRWCISGKVKDEQLNYCYHR
537	MAG14_130	MAG14_130_537	122	2	0	11	1	0	1	1	3	1	0	0	0	0	0	0	20	hypothetical protein	ttgcgaggagttgcgaagcagtgctggtgttctgctgatcagcacaatagcgtagttagcaaaggtgattggtatactattcacaatcaatatgacttatgggttgctgataatcttttatga	MRGVAKQCWCSADQHNSVVSKGDWYTIHNQYDLWVADNLL
538	MAG14_130	MAG14_130_538	875	9	12	24	6	12	18	12	19	10	0	0	0	0	6	0	128	Putative acetate efflux pump, MadN	gtgatttatctttcaggggtcacccttctttggtctttttcttttagccttatcggtgtttatcttgcgggtcaggttgacccttatttttcagtgctgagcagggttttgcttgcatcatgcgtatttttaccttttcttcgtataaaaggcctaccaaggagtatggccttaaaactcatggctattggcggtactcagcttggtttgatgtacctgttttattatcagtcatttctctatttaagcgtgccggaagtacttttattcaccgtttttacgcccatctatattacgctaatttacgatctgatgaaccgtaatttttcaccatggtatcttttaacagctgttattgctgttttaggcgctatcatcatacagtttaacggtatgaat…	MIYLSGVTLLWSFSFSLIGVYLAGQVDPYFSVLSRVLLASCVFLPFLRIKGLPRSMALKLMAIGGTQLGLMYLFYYQSFLYLSVPEVLLFTVFTPIYITLIYDLMNRNFSPWYLLTAVIAVLGAIIIQFNGMNEGYFKGFMIIQGANICMAMGQVAYKVLLEKEKLRLSQHQIFGWFYLGALTVAATAYLLLGDMTKLPTTYTQWGILGWLGIVASGLGYFFWNKGACKVNPGALAIMNNALIPAGLIVNIAIWNRDVDLTRLGLGGGVILLSLLVNEYLIKPDRRIPLSN
539	MAG14_130	MAG14_130_539	311	7	10	30	3	12	22	20	57	6	2	0	0	0	3	0	172	DNA-binding protein Fis	atgactgcaacacaggttatgactgagaagcactcactcaatagtacccacagcacgcgtttaactgagcataaagaagtccagcctcataccctcagagatagcgtggaacgggcaatgaataattatttttcacaccttgatggacaggatgtaactaatgtttatgaaatggttatgtctgaagtagaagcccctatgctggaagccattatggcttatgtagaaggcaatcaaaccaaagccgctacttttctaggactgaatcgcggaaccctgaggaaaaaactaaaacaatacagattattataa	MTATQVMTEKHSLNSTHSTRLTEHKEVQPHTLRDSVERAMNNYFSHLDGQDVTNVYEMVMSEVEAPMLEAIMAYVEGNQTKAATFLGLNRGTLRKKLKQYRLL
540	MAG14_130	MAG14_130_540	1025	46	11	78	13	9	16	37	57	17	3	0	0	2	13	0	307	tRNA-dihydrouridine synthase DusB	gtgaaaataggcccttataaactgccatattctgctatccttgcacccatggcaggtgtaactgacctcccctttcgaaggttatgtatgagaatgggggcaggaatggctgtttcggaaatgctgacaagcaaccctaaattatggcatacccgaaaatctattttgaggatgcaccatggtgaagaatatgagccacgatcagtacaaatagctggcagtgatccagatgaaatggctcgtgcagctttgttgaacaaacataaaggcgcacaaattattgatataaacatgggttgtcctgctaagaaggtttgtaataaagcagcaggctctgctctattaaaagacccaacgctggtacaaaatattcttcatgcagtggttgctgccgttgat…	MKIGPYKLPYSAILAPMAGVTDLPFRRLCMRMGAGMAVSEMLTSNPKLWHTRKSILRMHHGEEYEPRSVQIAGSDPDEMARAALLNKHKGAQIIDINMGCPAKKVCNKAAGSALLKDPTLVQNILHAVVAAVDIPVTLKIRTGWDRENRNGVEIAQIAEYEGIQALAVHGRTRACMYKGEAEYSTIADICRSVSIPVIANGDITTPEKAKYVMDTTGAQAVMIGRAAQGRPWLFREINHYLKYNEILLSPSLEEVFSILMEHIETLHHFYGEHQGVRIARKHVSWYMQDKPFYSAFRKTFNTLDTAQAQKTYIKQFFDILSVKMPLKPPEITEANHCLQLR
541	MAG14_130	MAG14_130_541	884	8	11	32	6	10	21	35	78	24	0	0	0	0	19	0	245	Ribosomal protein L11 methyltransferase	atgccttggattcaaatcctacttgagacaacctcagatcatgttccacgcttggaaagcttgctaatggaggcgggcgcaagcgctgtgacttttcaggatgcaaagaatcaaccattatacgaacccgagctaggcagcacgccgctttggacaaatacaaccgttataggcttatttgatgctcatgaagagactagtgccatcgtctctttcttaaaagctgagtcaggtatagctccttttcccaaatacaaaatagatattgttgaagataaagattgggaaagagaatggatgactcattttcacccaatccgctttgggagtaagctctgggtttgtcctagttggaaaacaccgccggagcccggtgcgatcaacctgatgcttgatcct…	MPWIQILLETTSDHVPRLESLLMEAGASAVTFQDAKNQPLYEPELGSTPLWTNTTVIGLFDAHEETSAIVSFLKAESGIAPFPKYKIDIVEDKDWEREWMTHFHPIRFGSKLWVCPSWKTPPEPGAINLMLDPGLAFGTGTHPTTALCLKWLDQQKDINGSTLVDYGCGSGILAIAACLLGAKQVVGVDIDSQALEATINNAQRNKIVVEKLEVFLPNDFPSIQVSYVIANILAQPLIALASKLAEMVETGGHLALSGIVFEQTEAVINAYSPWFKIGEAVHQEGWVLISGQRY
542	MAG14_130	MAG14_130_542	1352	26	14	57	14	18	36	35	119	22	0	0	0	2	28	0	371	Biotin carboxylase of acetyl-CoA carboxylase (EC 6.3.4.14)	atgctggataaagtcgttatagcaaatcgtggcgaaatagccctaagaattttgcgtgcctgcaaagagctaggcatcaagaccgtcgcggttcattcaaaagcagatgaaagcttgatgcatgcacacttggccgatgagtcggtgtgcataggccccaataatcccacagaaagctaccttaatattccagcaattattagtgctgccgaagtcacaggggcatctgctattcacccgggttatgggtttctctctgaaaacgctgactttgcagagcaagttgagcgtagcggctttatattcattggcccaacgccggatgtgattcgcatgatgggtgataaggtatcagctattcaagcaatgcagcgcgcaggcgtgcctactgtgccaggc…	MLDKVVIANRGEIALRILRACKELGIKTVAVHSKADESLMHAHLADESVCIGPNNPTESYLNIPAIISAAEVTGASAIHPGYGFLSENADFAEQVERSGFIFIGPTPDVIRMMGDKVSAIQAMQRAGVPTVPGSNGALDDDTRKTLKIARKIGYPVLIKAAGGGGGRGMRVAHCEADLLNDIALTKAEAKAAFNNDTVYLEKYLQNPRHVEIQVLADGQGHAIHLGDRDCSLQRRHQKVIEEAPAPSISEDERATVAAACTKACIELNYRGAGTFEFLYENGEFYFIEMNTRVQVEHPVTEMISGVDIVKEQLLIASGQPLSIKQEDIHLKGHAFECRINAEDAKTFMPSPGKIDQFHAPGGNGIRVDSHLYNGYNIPPFYDSLIAKIISYGPDRETAL…
543	MAG14_130	MAG14_130_543	488	14	4	34	11	6	9	21	53	18	0	0	0	0	15	0	185	Biotin carboxyl carrier protein of acetyl-CoA carboxylase	atggatatcagaaaagttaaaaagcttattgagttactggaagagtcaggcattgatgagctagagattcacgaaggcgaagagtctgttcgtatcagccgctatactgaaaaacaaccaacagtaatgccctatcctgcttatgctcccgctccagttgggacgccttctgcggctcaacaaccgacatctaacacagttgtcgctgcgcaatctcagtcagcctcatctgagactaaaccaaaggaagttacgggtcaccaagttaaatcgcccatggtaggaacttactatgctgcgccttcccctaatgaccctaactttgttgaggtgggtcagacagtaaaacaaggtgatgtgctgtgcatcgttgaagctatgaaaatgatgaaccaaatt…	MDIRKVKKLIELLEESGIDELEIHEGEESVRISRYTEKQPTVMPYPAYAPAPVGTPSAAQQPTSNTVVAAQSQSASSETKPKEVTGHQVKSPMVGTYYAAPSPNDPNFVEVGQTVKQGDVLCIVEAMKMMNQIKADKSGVVEAILIENGQPVEYDQPLFTII
544	MAG14_130	MAG14_130_544	443	8	11	26	10	8	12	26	45	10	0	0	0	2	15	0	173	3-dehydroquinate dehydratase II (EC 4.2.1.10)	atggctagcatactcgttatacatggtccgaacctgaaccttcttggaaggagggagccaaacgtttatggcacgattacgttaaatggagtagatcggacacttgccggcttagccgatgatcatggccaccaacttgaagcctttcaaagcaacgctgagcatgaactgatagagcgcatccacaaagccttaactgataatgttcagtttattctcattaatccggcagcatttacgcatactagcgtagcaatcagagatgcattgttagcagtgtctattcctttcatcgaagtacatttgtctaatgtatataaaagagagcctttcaggcagtgctcttatttcaccgatattgctgagggcgttatctgtggactagggactaaaagttac…	MASILVIHGPNLNLLGRREPNVYGTITLNGVDRTLAGLADDHGHQLEAFQSNAEHELIERIHKALTDNVQFILINPAAFTHTSVAIRDALLAVSIPFIEVHLSNVYKREPFRQCSYFTDIAEGVICGLGTKSYEYALRFAFEKLKEQ
545	MAG14_130	MAG14_130_545	527	6	15	17	4	8	48	35	64	20	0	0	0	0	22	0	240	Inorganic pyrophosphatase (EC 3.6.1.1)	atgagcttttcttccattagggcgggtaaggatattcctcgtgatatctatgtagccattgaaattccagctaatgcatcacctatcaagtatgaaattgataaagatatggatgccctgctggttgatcgttttatggcaacaccaatgttttatcctgcaaactacggctatatcccacaaacactagccgatgatggtgaccctctagatgtgttggttgttacgccatatcctgttgtgcctggcgcggtgattcggtgccgacctgtaggtatgctgaatatggcagatgaaaaaggacaggatgaaaaacttattgccgttcctcatgacaaactcactgctatttacaaagacgttaaagaatatactgacttatcggcgcttttactcaag…	MSFSSIRAGKDIPRDIYVAIEIPANASPIKYEIDKDMDALLVDRFMATPMFYPANYGYIPQTLADDGDPLDVLVVTPYPVVPGAVIRCRPVGMLNMADEKGQDEKLIAVPHDKLTAIYKDVKEYTDLSALLLKQIEHFFENYKDLEEGKWVKIKGWEGAEAAHAVIERSVHNYKS
546	MAG14_130	MAG14_130_546	131	1	0	4	0	0	2	2	7	0	0	0	0	0	0	0	16	hypothetical protein	ttgatgataaactcttctacaggcatgaccgataccgtctggatagtggttcgcacttctattttaggcggtagtcatgcctttctggctagattattaaaagtcacacatcaggtcattaatgggaaataa	LMINSSTGMTDTVWIVVRTSILGGSHAFLARLLKVTHQVINGK
547	MAG14_131	MAG14_131_547	305	1	2	5	4	11	5	4	11	6	4	0	0	1	0	0	54	hypothetical protein	ggtagccattgccagagtgttttctctggcggttataatagacctcaatatattcaaaaattgcctgcttcgcctcttcccttgtatggaagccttcatggtgaacaagctcagcttttgtacattggcaagagaacattactggatttactagacaccgaaaatgaattatttcaatctagccaaagcctgactgaagcgacttatgaagaagtctcttctcgctatcgtattctttcaggtattggacaactattgaatgcgtttaatttagcttggggacgggaatggtctcaggatgactag	GSHCQSVFSGGYNRPQYIQKLPASPLPLYGSLHGEQAQLLYIGKRTLLDLLDTENELFQSSQSLTEATYEEVSSRYRILSGIGQLLNAFNLAWGREWSQDD
548	MAG14_131	MAG14_131_548	2624	2	6	21	17	12	25	14	47	8	2	0	0	0	14	2	170	hypothetical protein	gtgtttgtactccgtagttattcgattgaagcattgtttaagtcatttcttttattgctatctttggcattattatttatttgtcatttttctcaagccggtggcggagaacaaagtgaggaatttctccaagcctgtatgtcaggagatctctctaaggtgcataattatctgtcttcaggcgccgaggtcaatgccgagatggaggatggctccactgccctgatgctcgcagcacataacggcaaaaaagaggtcgttgaacttctgatcaagaacgacgccgaggtcaatgccgagacggaagatggctggactgccctgatgatcgcagcacagggcggctacaaagagatcgttgagcttctgatcgagaacggcgccgaggtcaatgccgag…	MFVLRSYSIEALFKSFLLLLSLALLFICHFSQAGGGEQSEEFLQACMSGDLSKVHNYLSSGAEVNAEMEDGSTALMLAAHNGKKEVVELLIKNDAEVNAETEDGWTALMIAAQGGYKEIVELLIENGAEVNAETEDGWTALMIAAQDGYKEIVEILINRAADVNAGTENGRTALMAASQGGYKEVVELLIANDAKVNAHQRNAGKFNGWTALMSAAQNGHKDIVELLIKKATDVNAGMENGWTALMAAAQGGYKEVVELLIDNGTEVNARTEDGLTALMAAAQNGKQEVVGLLINRAADVNAAKENGRTALMAAAQNDHKEVVELLLNRAAGVNARMEYGWTALMIAARNGKKEVVELLLNRAADVNVRMEDSWTALMIAAQQGYKEVVELLIKNGAEV…
549	MAG14_131	MAG14_131_549	248	0	0	0	2	0	0	0	2	0	0	0	0	0	0	0	4	hypothetical protein	ttgcgttttgctgatgatgaacatgtacttaatttaagcacaatcgcacaccagggtaatgcccgctacctagtagttctgactcgagaaagagatagaactgagcaagaacctattaaagaatattattatattgatctcaaggtagactgcaattcagatggcagcgtctgtcagtttgtttcaccaaccaagaatgacccaattaaaatcaaaatgaaaaatgagccaatgggtcatggatattaa	MRFADDEHVLNLSTIAHQGNARYLVVLTRERDRTEQEPIKEYYYIDLKVDCNSDGSVCQFVSPTKNDPIKIKMKNEPMGHGY
550	MAG14_131	MAG14_131_550	326	2	0	0	0	0	0	2	0	0	0	0	0	0	0	0	4	hypothetical protein	atgatgattaaaataaataagacaaccctatatacccttttgctattaatccctttaatttgggtagttgctgatacggtacaagcagaggatgcagaagtaagaataacaataaaagatgaagagtatggaaagcacagagttgattttaaaattgaagataataaagctgtctttctaaccgaaagagggaaaaaagtcgttgataaggaaaaacaaaaaaagaagaataaaaaagtcctgaagttcatatacaaaaagcaagtcaagaccttacggaagaatacgttcttagtaaagcatgggaaaattctattacaagcttaa	MMIKINKTTLYTLLLLIPLIWVVADTVQAEDAEVRITIKDEEYGKHRVDFKIEDNKAVFLTERGKKVVDKEKQKKKNKKVLKFIYKKQVKTLRKNTFLVKHGKILLQA
551	MAG14_131	MAG14_131_551	119	0	0	0	0	0	0	0	0	0	0	0	0	0	0	0	0	hypothetical protein	ttgccgagtaggattaatgataattttcaggtattcaatcctaaatctttaattaacttgggtataggctgtgttcttaagccactgataccgtgtaatattaatcaaaagaccacttaa	MPSRINDNFQVFNPKSLINLGIGCVLKPLIPCNINQKTT
552	MAG14_131	MAG14_131_552	122	0	0	0	0	0	0	0	0	0	0	0	0	0	0	0	0	hypothetical protein	atggagagtattttaaataaagaggcagagcattgtttatacgaaaataataccataaaatggttccccaatttcaatttattagcgcgtacacccaatcggctagataaaactatgaagtaa	MESILNKEAEHCLYENNTIKWFPNFNLLARTPNRLDKTMK
553	MAG14_131	MAG14_131_553	590	5	0	11	19	21	7	19	20	9	1	0	0	2	0	0	114	hypothetical protein	atgataaatacgctgaaaaaattcactctagctgtcgtagcaagcgctgttgcgagcactgctgtagctgcgactaatccagctgcgccaacaggggggtcaagccagggagactttgatattacgctcaataaagaagacctgatcatcattaataattttgaaaatatgtatttagcacaatttattgagaatggcccaaacggtgattatcttggttctcaagagctttgtattgggcgagcaggggcttcagttgaatcggaactaggctatgctattacagcatctaatgctaaggctaactttattttaaataatggcaatgatgatacagtgcctgcaaataacattggttacaaagtgtattttgcggacaaaagtttaggcgtacaacaa…	MINTLKKFTLAVVASAVASTAVAATNPAAPTGGSSQGDFDITLNKEDLIIINNFENMYLAQFIENGPNGDYLGSQELCIGRAGASVESELGYAITASNAKANFILNNGNDDTVPANNIGYKVYFADKSLGVQQFAQGIELVHSMQNMNDFNTDMAETGCVPGTNNSTVWVKADGGQVANAAPGVFTDTVTVTVAVK
554	MAG14_131	MAG14_131_554	2036	6	4	15	20	17	39	26	47	18	0	0	0	4	4	0	200	hypothetical protein	atgagtcgtgttctaaggtggatagctatatttctggccggcttggtgctacttatctgtgcggctgcaatcttactgcctaaagtgataaaccctaatgactaccgtgatgatattaccaagctagtttatgaaaaaacagggctaaccttaaaagttaatgggcctattgagtggtctgtttttccttggtttgggctttctatacaagatgtatcggttgcaggtacagaaggcaggccattagcaaaactgggtgatgcaaaagtcagtattgaattattaccgctgctaaataaaaagctgaatgttgaaacggctaatttaacagatgttgatttagatttggtgcgaaatgaagatggaagaggtaactgggagatccatcgtcctgttcac…	MSRVLRWIAIFLAGLVLLICAAAILLPKVINPNDYRDDITKLVYEKTGLTLKVNGPIEWSVFPWFGLSIQDVSVAGTEGRPLAKLGDAKVSIELLPLLNKKLNVETANLTDVDLDLVRNEDGRGNWEIHRPVHSNQSGDAASQKTSVNKTISKTSHSNPFQLDIASIKVTGFKMSYDDRVTNNFYTIDKANFTTGAIANQKPFSIDIDAVISSKSPDITFRSKINGALTLNLKEGSYDLDNFTATVYPNIANTEKLSMKGDIQFKSRPLMVQGDIDFPTFNPKKLFADLGSPLPPMMGQNALDAVSFSTHLQSNGKSLNLSKIKLKVDNFSLNGFFTVTDFNKQAANFKFTGSNINLNDYMSVTTKEKNSHQNQSTAVTEVKQMPLIPENLLKGLNVIG…
555	MAG14_131	MAG14_131_555	644	2	0	6	12	12	10	18	16	6	2	0	0	2	0	0	87	Cytochrome oxidase biogenesis protein Sco1/SenC/PrrC, thiol-disulfide reductase involved in Cu(I) insertion into CoxII Cu(A) center	atggtttctggtgttagaaaaacagtgttcctactggtggccgtaatagccgttgtgcttggtgctactacttacaaatactctcaaaaaaaattgctcagtgaagaacagttaaaatcagcaggagcaattatttttgagacacctagaagctttaagtttgaagggctagttaaacataatagtaagttactgactaaggatgactttaaaggtcgatggtctcttatttattttggctatacattttgtccggatatttgccctacttcattagcaaaaataaataatatggataaacaattaaaaaaggaaatgccagaattagctgaaagaatgggctatatgatggttacggttgaccccaagcgagacagtgtcgataaactgaaacattac…	MVSGVRKTVFLLVAVIAVVLGATTYKYSQKKLLSEEQLKSAGAIIFETPRSFKFEGLVKHNSKLLTKDDFKGRWSLIYFGYTFCPDICPTSLAKINNMDKQLKKEMPELAERMGYMMVTVDPKRDSVDKLKHYLPYFNPYFIGVTGDIKNIYDLTRQFNIAFTPVINTEDEFYLVDHSANLVIINPQGDYHGFIRPPFDPEKLSLVMASVNKLF
556	MAG14_131	MAG14_131_556	215	0	0	0	0	0	0	4	2	2	0	0	0	0	0	0	9	Heme O synthase, protoheme IX farnesyltransferase, COX10-CtaB	gtgattattttaccttttcttatcggtatggctggttttatctatattgtgggctcggtcattttaggcagcaggtttctctattggtctattgtgttgattagaaatagccggccgaatgcagcgataaagacatttaaattttcgattatttatttgttgctgctttttttattgctattgattgatcattacagtatttatttatggatatga	MIILPFLIGMAGFIYIVGSVILGSRFLYWSIVLIRNSRPNAAIKTFKFSIIYLLLLFLLLLIDHYSIYLWI
557	MAG14_132	MAG14_132_557	833	3	2	18	2	2	11	8	14	4	0	0	0	0	2	0	66	Thymidylate synthase (EC 2.1.1.45)	gtgaaacactatctggacttattacgccatgtaaaggaacagggcaccttcaaaacagaccgtaccggcacaggcacatatagcgtatttggctatcagctccgatttgacctgtctgaaggttttccgcttgttaccactaaaaagtgtcatctgcgctctattatccatgagcttctgtggtttctcagaggtgacactaacattgcttacctaaaagcaaataacgtcagaatatgggatgaatgggccacagccgagggcgagcttggccccgtgtacggtaaacaatggcgcagctgggaaggtcccaatggcgaggtcactgatcagatcaactggttgcttaatgaaattaaaaaaaaccctgactctcgtcgcttagtcgttagcgcatgg…	MKHYLDLLRHVKEQGTFKTDRTGTGTYSVFGYQLRFDLSEGFPLVTTKKCHLRSIIHELLWFLRGDTNIAYLKANNVRIWDEWATAEGELGPVYGKQWRSWEGPNGEVTDQINWLLNEIKKNPDSRRLVVSAWNPSVLPDIALSPAENAANGKQALPPCHCLFQFYVLNGKLSCQLYQRSADIFLGVPFNIASYALLTMMIAQVSGLGYGNFIHTFGDAHLYTNHLEQADEQLSRTPYPLPTMKLNPAITCLFDFTFDDFELLDYKAHPHIKAVVSV
558	MAG14_132	MAG14_132_558	839	2	0	24	10	8	8	13	29	22	2	0	0	0	11	0	129	Prolipoprotein diacylglyceryl transferase	gtgattgcttacccaaatattgaccctgtggcagtcagctttggcccattgaaaatacattggtatggtctgatgtacttagttggcttcgcctctgcttggtggttaggcactataaaagcaaaacgctccaatggcttatggcagccggaacaaatgggcgatttaattttttatagtgcactgggggtgatccttggagggcgtattggttatgtcctattttataatttcgattactttttacaaaaccccttatggctattcaagatctgggacggaggcatgtcattccatggtggcctactcggcgttttagtggctatgttattatacggtcgaaaatttgataaaagctttttccaaatgaccgactttattgctcccttggtacctatt…	MIAYPNIDPVAVSFGPLKIHWYGLMYLVGFASAWWLGTIKAKRSNGLWQPEQMGDLIFYSALGVILGGRIGYVLFYNFDYFLQNPLWLFKIWDGGMSFHGGLLGVLVAMLLYGRKFDKSFFQMTDFIAPLVPIGLGAGRIGNFINDELWGRVTHVPWAMVFPKDPEHLPRHPSQLYQFAMEGVLLFIALWWFSSKPRPRMAVSGLFLTLYGIFRIIAELFRQPDPQLGFIAFHWVTMGQLLSLPMVLIGLILITYAYRNNTLKNDMNIDDIAYLKRHKQ
559	MAG14_132	MAG14_132_559	791	1	2	15	4	2	5	4	12	7	0	0	0	2	3	0	57	Uncharacterized UPF0721 integral membrane protein	atgatttttctgctttatgctctactaggttcctgcgccggattactggctggcctgttcggtattggcggcgggttaattattgttcctgcgctgatatttagtttcaaactgcaaggcttgccaccggaaattctaacccatatggccattggaacatcttttgcgtctattgtgttcacttcgctgagttctacgcagacacatcataaaaaaagagctgtaaagtggtccattttcctctacatggctccaggaattttaataggggtatggcttggctcattgactgtctctcatatgaaaggagaaaccttacaattaattttgggtttatttgtcatactcatttcaataaaaatgctcctaggactgcaaccttcgccttcaaacaaaaag…	MIFLLYALLGSCAGLLAGLFGIGGGLIIVPALIFSFKLQGLPPEILTHMAIGTSFASIVFTSLSSTQTHHKKRAVKWSIFLYMAPGILIGVWLGSLTVSHMKGETLQLILGLFVILISIKMLLGLQPSPSNKKQSKPLLVIVSMIIGWKSALLGIGGGILSVTFLRFYRLSIRQAVGTSAACGLPIAVMGTISNIILGSGQTLLPKWSSGFVYWPAFSGIVLTSVFFARLGARLAHHFSTETLQKCFAVFLLVVGANLLWPLL
560	MAG14_132	MAG14_132_560	158	0	1	6	0	0	0	5	11	0	0	0	0	0	0	2	25	hypothetical protein	atgagcatggttagcgcaatggtgtcgttaaaattcgaggggtattattacagcaaaagcgacgccattacagtaacacgttttgttgatttttttagtcgcccgctgtcaatgagtgaattaatgtttagtaagtggctgctacgctattgtgattga	MSMVSAMVSLKFEGYYYSKSDAITVTRFVDFFSRPLSMSELMFSKWLLRYCD
561	MAG14_132	MAG14_132_561	527	8	8	15	13	6	22	12	33	8	0	0	0	0	14	0	147	hypothetical protein	gtgaaaaacgcaacattagacttccggtttgtgagggatcttttatccaaccttaatgagatcagctcatatcagttttatttagatcgccagactaccaaaacagttgaaattaacttagctggttcggttgttactgtagaagatgtcgagtctggattaatctctattatgctttctataaagcgcttaggacttgctgaagatgcaaaacgttttattaatggttatcgaaatagaaaagggctgtcattagcactttctgatattggaagtttagaacgcttgctttctatgccttcagctgctgataaaaataactacagtgaatcaatgtgggagcaacctcagcctcgtcgtactaaccacaacaaacaaacacgttataatacctctcat…	MKNATLDFRFVRDLLSNLNEISSYQFYLDRQTTKTVEINLAGSVVTVEDVESGLISIMLSIKRLGLAEDAKRFINGYRNRKGLSLALSDIGSLERLLSMPSAADKNNYSESMWEQPQPRRTNHNKQTRYNTSHRHRLTAKPKKQHLINKNKPVKTFANEYGDADKQLQDALRLLG
562	MAG14_132	MAG14_132_562	1376	21	16	78	22	28	55	38	84	16	3	0	0	2	12	0	375	L-cystine uptake protein TcyP, sodium:anion symporter family	atgaccgatgttattatcaatggtttgttgatgatagccatactatcaggctttatctggatgcaccgtaaaggctattcattttcagtacgggtatttgctgctatggcctcaggcttagcatttggcttggcattacagtggttttatggtgttggttctgcaactatcacacacacacttgattactttaacattgtaggtgatggctatattcgactgctaaaaatgaccattatgccactgatactggtgtctattattgccgctgctttgaaaatgcccataggcatgggcatgagtaaagtgctgatctccatactcgggctactattaggaatgaccgctgtggctgcactaatctctattacggtaacacaactatttcaccttgatgct…	MTDVIINGLLMIAILSGFIWMHRKGYSFSVRVFAAMASGLAFGLALQWFYGVGSATITHTLDYFNIVGDGYIRLLKMTIMPLILVSIIAAALKMPIGMGMSKVLISILGLLLGMTAVAALISITVTQLFHLDAAGLLGMHTSTVPDASTSQRLGELGNASVPKMLVDFIPANPFLDLTGQRPVSVIATVIFAGFIGFAGLSAIKVQPAIKERLLTGIDTIQSVVVAMVKMVLQLTPYGVIALMTKVAATSHIEEMKNLLQFITASYTALLLMFSVHLLLLSFFGVKPKQFLKGAGAVLAFAFTSRSSAGAIPMNIETQINRFGVPEGIANFSASIGATVGQNGCAGVYPAMLAMMVAPLAGIYPLDPSFIATLVLVVVISSFGVAGIGGGATFAALMVL…
563	MAG14_132	MAG14_132_563	1181	4	0	2	8	2	16	6	13	6	0	0	0	4	4	0	65	Membrane-bound lytic murein transglycosylase B	gtgttaaacgtcattttatttatgtcattgttggtatgtagtttttctgcatctgcgtgtgataattttcagcaatgcttactgcgtcttgaagaaacagcgctaaaagccggaatctctaagaaaacgatcaatgaagggttaaaaacagcccagtttctacccaaagttatcagcacagacagacatcagccagaatttaacgaaacattttatcagtatttacagcatgctgtgtctgataagcgtatcgcaaaagcagtatcaatgatgaagtcatatgagctgctgctaaatcagctaaaaaaaaggtatggtataccaccgcatatattgacagctatctttggcttagagtctaacttcggtagcaatatagggaaaacaaatattttaaat…	MLNVILFMSLLVCSFSASACDNFQQCLLRLEETALKAGISKKTINEGLKTAQFLPKVISTDRHQPEFNETFYQYLQHAVSDKRIAKAVSMMKSYELLLNQLKKRYGIPPHILTAIFGLESNFGSNIGKTNILNALTTLSCDNRRSLFFTKELISALKLMDMYGFSKESMVGSWAGAIGYTQFMPSNYLGYALSSDNRSPPDLWRKISDALASTANYLNKKGWKSGWIWGKEITLPKSFDYRMTGLKSSKKLNIWQKLGVRNADNSNMPEYDISGSVLVPGGHHNPAFIVYDNFHVLLRWNRSIFYAIAVGYLADRINGKPPFKKAIQNDPPLSVVQIQLLQKKLNALGYACGKEDGMLGTETQQGITTFQYANHMIADGFPRVAVLKSLGISR
564	MAG14_132	MAG14_132_564	893	6	0	18	6	6	21	14	12	8	0	0	0	0	8	0	109	dTDP-4-dehydrorhamnose reductase (EC 1.1.1.133)	atgaaagtactggtaataggctgcaagggtaaaataggatatgaggtgtgccttgctcttaaagataagggcatagcttttatagcacccagtcaagcagagcttgatctgacgtgccctgagcagattcaatctgcaatcaaacaatatcagcccagtatagtggtcaatgcggcatcttataacgacccttctggtgctgaaaatgagccgactttttgttatagagtaaacagggatggttcagctgtgttggctgattgttgtcgtcagcaaggctgcaagctaatacacctttctagctaccgtgtttttgatggtcttcaacaagaatcttacgatgagcaagatagcccaaacccatcacgtgttcatgccattagccgatggcaaggtgaa…	MKVLVIGCKGKIGYEVCLALKDKGIAFIAPSQAELDLTCPEQIQSAIKQYQPSIVVNAASYNDPSGAENEPTFCYRVNRDGSAVLADCCRQQGCKLIHLSSYRVFDGLQQESYDEQDSPNPSRVHAISRWQGEEQIRQRCPEHIILRFSWIISKRRNNILTRLLKQISHHQEVTVTSDQVGCPTPACDAARVVVAIIQQIKYGADAWGTYHYAGTEAISANSFAEIVVTEAANHHHLKVKKLKMNKMDNREGVRPPANAVLNCSSVRNTFGIQTRSWRPVITEIIRRYYHQEKIEAD
565	MAG14_132	MAG14_132_565	2453	11	4	27	8	37	16	8	41	14	0	0	0	27	0	0	193	hypothetical protein	atgaagttgtttaaaccatccaataaattcaaaaaaaatttattgtatactgccattgcagcgacgctctcaggtttttcctttggggctaatgctatgattgaatcggtaccggctgaacgtagtggtaaggctgtaacaacacttgatgcaactatcgcgggtaccgaaattagacctgagacagtgttgaatgtttcaggtaaggtcactggtaatgtattaggagtgggaggggtaccttaccatactgtggatattaagcaggggggaaagctaagcactaatgaaatcttcacaagtaatcttgttgtagcaggcaaactgttatcgttagcagttgaagagggtgcaaatactggagcgattaaccttgtagcgccccatcgactttataac…	MKLFKPSNKFKKNLLYTAIAATLSGFSFGANAMIESVPAERSGKAVTTLDATIAGTEIRPETVLNVSGKVTGNVLGVGGVPYHTVDIKQGGKLSTNEIFTSNLVVAGKLLSLAVEEGANTGAINLVAPHRLYNTSDGGIAGLFYNEDSDFEFHKLNEQSQSLGAVPPENITTAQERSLAFTGTEAGVRFSGDNAKTFDTLTLTKSVLGIDLRGSASTNSDHLVKLDKIKVTGDGASLIARVNNSGRILTHDLDLRGKGLAAGVTINQSSVEKPTLLPVALYPNGDEAGNLQPYEVGTPGGAQVHVGSGYNALLDIVDHVMVTTSSDYDPPPAAAPSVEAASDDETVAPPPSPVDRQPAHVLIRIDSSFVDEGEDERATESTKPMSVTRQASRTNLTPYN…
566	MAG14_133	MAG14_133_566	113	2	0	10	1	3	1	5	4	2	0	0	0	2	4	0	36	hypothetical protein	atgacccgacacatggcagttatactgaagcgcttctggttatccttgatgaactgggatctcaaagactttttcttgcctgtcaccttttttaaaatagagcgtttctcctga	MTRHMAVILKRFWLSLMNWDLKDFFLPVTFFKIERFS
567	MAG14_133	MAG14_133_567	1307	9	16	37	13	18	38	25	58	9	0	0	0	0	8	0	232	Tyrosyl-tRNA synthetase (EC 6.1.1.1)	atgtcagatagccacaattcgttactttatgaccttaaagcgcgaggtctaatcgcccagaccacagcagaacatgaattagctgcacatttgaatgaacagtcacgaacgctttattgcggctttgatccgaccgctgatagcttgcatcttgggcacttggttccgctattggtcttgaaacggttccagatcgctgggcataaacccatcgctctagttggtggtgctacagggttgattggtgatcctagctttaaggcagcagagcgccagctgaatacaaaggaggtgatatccagctgggcagataaaattcgtcatcaggtaagtcgatatatcgactttaactgtggagaaaatgctgccattgtagccaataatttggactggactggt…	MSDSHNSLLYDLKARGLIAQTTAEHELAAHLNEQSRTLYCGFDPTADSLHLGHLVPLLVLKRFQIAGHKPIALVGGATGLIGDPSFKAAERQLNTKEVISSWADKIRHQVSRYIDFNCGENAAIVANNLDWTGELTALAFLRDIGKHFSVNSMINKESVQQRLNREGSGISFTEFSYALLQGMDFSELNRRYNCTVQIGGSDQWGNIVGGIDLSRRQNKTQTFGLTVPLITKADGTKFGKTEGGAVWLDPKKTSPYAFYQFWINTADADVYKFLRYFTFLSIEDIQGIEQADAKTQGRKSAQAILAGEVTQLVHGEQGLTSAKRITDALFSGVFSSLSEQDLEQLKQDGLPCSTLLHKDLGERPMTQLFVEVGLVKSGKQVKDALQRNAVMFNGLARGM…
568	MAG14_133	MAG14_133_568	563	8	4	24	0	4	6	10	25	4	0	0	0	2	2	0	89	hypothetical protein	atgcgaccattttatgtactgttagttaccgctttattaccagtggccagcggactttgcgcagctgtgtataaaactattgatgaacaaggcgctgttagcttttctgatatcttgccaaagtcagagcaagtcaaagagattattctgcaaccagtcaatacgctgaaaatgactgtgcctaaagtagtagaaccggtaaaaaaaggctccgcaaacaacggtactcctcaggtgaattatcagctggttattaacacgcctgccgatttagctaccctacgtggaacaggtagtattaatgttaatgttaatgtaatacccacattggctaaaaatcatactctagacctattgcttgatggtgtgaaaaaaataggcccgcagcgtatgccacat…	MRPFYVLLVTALLPVASGLCAAVYKTIDEQGAVSFSDILPKSEQVKEIILQPVNTLKMTVPKVVEPVKKGSANNGTPQVNYQLVINTPADLATLRGTGSINVNVNVIPTLAKNHTLDLLLDGVKKIGPQRMPHFLLKNIDRGAHQITVRVLDNEGKPLKETTITVYVFRPFIRSKPADTDNGNSKTN
569	MAG14_133	MAG14_133_569	134	2	0	0	0	0	0	0	1	0	0	0	0	0	0	0	3	hypothetical protein	atgatatggcatgataccaatcgagtttgtttaattatgctattgcgctaccagcagcactgcgctggaacgctttgcaatagctctgctgccttattctggaatctggctgcctatgctcatggtgatagttag	MIWHDTNRVCLIMLLRYQQHCAGTLCNSSAALFWNLAAYAHGDS
570	MAG14_133	MAG14_133_570	161	2	2	1	0	0	0	0	2	0	0	0	0	0	0	0	7	hypothetical protein	ttgattttatcagttcgcaggggcagctctgctgattcattttacaaagaagtcacggggttattttgggctatttctaagcgtttgcaaaaccttgggcttgcctcatttatattcctacctacattatttagcaatctaatggtcataatagatttgtaa	MILSVRRGSSADSFYKEVTGLFWAISKRLQNLGLASFIFLPTLFSNLMVIIDL
571	MAG14_133	MAG14_133_571	1292	26	18	75	9	17	47	21	61	10	2	0	0	5	16	0	307	Adenylosuccinate synthetase (EC 6.3.4.4)	atgagtaagactgttgtcgtgctgggcactcagtggggtgatgaaggtaagggcaagattgttgacttgttaacagaacaggccaaagctgttgcccgttatcagggtgggcataatgcaggccacacgttggtgatcaatggagagacgacggttttacatttgattccatcaggcattcttcgtgatggtgttatttgctacatcggaaatggtgtagtgctttctcctgaggcgctgttggaagagatagtacaacttgaggcaactggtgtgcctgtgcgagagcgtctcaagctgagtccatcatgtccccttattttgccttatcatattgcactggataacgcccgtgaactagcgcgaggcaaaggaaaaattggtactaccggccgtggt…	MSKTVVVLGTQWGDEGKGKIVDLLTEQAKAVARYQGGHNAGHTLVINGETTVLHLIPSGILRDGVICYIGNGVVLSPEALLEEIVQLEATGVPVRERLKLSPSCPLILPYHIALDNARELARGKGKIGTTGRGIGPAYEDKVARRGLRLADLFYPERFAHKLKEVMAYHNFVLSHYYKAETVDYDQVLNDALAMGKQLEPLVERVTDRLHEHHKKGDHILFEGAQGSLLDIDHGTFPFVTSSNTTAGGVSTGSGFGPLYLDYVLGITKAYTTRVGAGPFPTELNCKVGQHLAKKGHEFGATTGRPRRCGWFDAVALRQAIQINSISGLCLTKLDVLDGLETINICIGYKNLQGELITTPVDVEEYETIEPVYETVPGWSESTVGAKSFDVLPDNAKAYI…
572	MAG14_133	MAG14_133_572	200	12	8	30	4	7	2	2	17	6	0	0	0	1	6	0	95	hypothetical protein	atgcttcgatacgcagagtttgagccactattgcaagcattaaagttattgaaacgctgggtatatcctttattggaaactataagtgagcaagtgctgagcttggcatcatttggtgtgatcacgatggatgttacacccgtatttttaaagtttaatctctcgcactcaaacgcttttcacaacttttctgcaagatga	MLRYAEFEPLLQALKLLKRWVYPLLETISEQVLSLASFGVITMDVTPVFLKFNLSHSNAFHNFSAR
573	MAG14_133	MAG14_133_573	878	94	63	185	23	44	91	84	155	62	5	0	0	2	29	2	839	HflC protein	atgagccaaagaatcttcagtgggctgattactgtccttgtcctcatttttattggctacaactcgctgtttgtaatttctgctagagagcgtgcagtacagctccggtttggtcaagttgttagagcagacctgaagcctggtttgcattggaaagtaccgttcgtggataccatcagagtgtttgatggtcgcttacaaacacttgatgtgccttctgagcgttttctaaccttggagaaaaaagcggtcattgttgattccttcattaagtggagaattcataatgttaataccttctataaatcaactgcgggcgacttaatgcgcgcgaatacattattagctcagcgtgctgaatctaggatgcgtaataagtttggaggtctcactttgaac…	MSQRIFSGLITVLVLIFIGYNSLFVISARERAVQLRFGQVVRADLKPGLHWKVPFVDTIRVFDGRLQTLDVPSERFLTLEKKAVIVDSFIKWRIHNVNTFYKSTAGDLMRANTLLAQRAESRMRNKFGGLTLNEVVSGQRDQLMDDITHSLDQVAETELGVSVVDVRVKRIDLPPQVSDSVFDRMSSEREKEAQEYRSKGKEIAEGIMADADRQERIILANAYKKAEIARGEGDAKAADIYARAYRKDPEFYAFYRSLQAYKKSFDGSGNMLLLEPDSDFFKYLNNLKAGRK
574	MAG14_133	MAG14_133_574	1163	125	131	392	50	75	115	149	299	68	4	0	0	4	50	0	1464	HflK protein	atggcctggaacgagccgggtggaaataaccaagatccatggggcgggggaaacaaaggcaaaaaacagggcccgccggaccttgatgatgcctttcgtaaactccaaagtaaactaagcagtatgtttggtggcagcaaccgaagcactggtaggggtaataatactggttcatcttctgtacttcttattggcgggctggtcctgctagctacgatctatttgtggaatgcgatatataccgttgatgaaaaagaacgggcggttatactgcgttttggtcagtatgttgaaaccgtgggaccgggattgcatatttattttcctggtatcgaacaaaaatttcaggagcgtgtaactgaatatcgaacctatagcctgcgtcagcagatgctcacc…	MAWNEPGGNNQDPWGGGNKGKKQGPPDLDDAFRKLQSKLSSMFGGSNRSTGRGNNTGSSSVLLIGGLVLLATIYLWNAIYTVDEKERAVILRFGQYVETVGPGLHIYFPGIEQKFQERVTEYRTYSLRQQMLTEDENIVEVSMSVQYNITNIKDYTLNVAKPLVSLEEATQSALRHVVGSSEMHQVLTEGRETMGKDVRDRLQTYLNSYGSGINVRKVNVESAQPPSEVQAAFDDVIRAREDEERSKNRAEAYANMIIPEARGKAQRTIENASAYRDEVIAKAEGEASRFSEFYTEYRKAPEVTRERLYIETMQDILSKNNKVLIDVKGGNNMMYLPLDQLMKAKKGSQKGSVSELSAKELNAISNQVTEKLNKRANSARSSGRTSR
575	MAG14_133	MAG14_133_575	1346	33	28	110	15	20	41	48	67	34	0	0	0	2	10	0	408	Ribosome LSU-associated GTP-binding protein HflX	ttgttttttgaacgtcacgaagggggcgaaaaggctgttcttgtccatcttgaaatcaaagatgaaggaacgcgcgaagatccgcaggaatttatcgagttggtcaattcaacacgtgttttaatcgcagcgtctattacagcaaatagccagcatcttaacccgaggtttctcgtcggatctggcaaaatccaagaaatacgggagctggttactcttcatgatgcagatgtcgttatctttaattatgcattatctcctagccaagaacgaaatatagaggctgaagtaaaagccagagtcgttgatcgaatcggtttgattcttgatatatttgcacaacgggctcgaacgtttgagggaaaactacaagttgagctagcgcagttacaacacatg…	MFFERHEGGEKAVLVHLEIKDEGTREDPQEFIELVNSTRVLIAASITANSQHLNPRFLVGSGKIQEIRELVTLHDADVVIFNYALSPSQERNIEAEVKARVVDRIGLILDIFAQRARTFEGKLQVELAQLQHMSTRLVRGWTHLERQKGGIGLRGPGETQLETDRRLLRVRIKSIIRKLDKVRKQRDQSRRSRKRAELPLIALVGYTNTGKSSLFNALTDASVYAADQLFATLDPTLRRLNFPDVGGVVMADTVGFIRHLPHKLVESFRATLEETRQADLLLHVIDSSDLERLDNMEQVHLVLNEIEAQDIPMLEVFNKIDLLEGVRPKIQRDEHGKPVRVWLSALSGEGLNLLQQAVSELLVGHMVEGALSLDPSQGNVRARLYKLGGVLSEAYDDQG…
576	MAG14_133	MAG14_133_576	710	12	18	100	10	6	30	31	63	22	2	0	0	2	7	0	303	hypothetical protein	atgaatgctttcggtaggttgatattttttttaatagtaggggtattagcgggctgcgccaataagcctgctcataacgagcctgtagttcaatatacggtcacacagcatgatcagggagcttttcctagtcaatccatgcatggccgtgttctttttttgcaatgcccaggtggttatgaatttccagcttatatccagaaagatacagcatggttgtttttaccagaaggaacaaaacgtctagtgtctggtaagtcaaccggcggtgatcactactccaacggtgagtatagctttttggttggcaaagatgatgctgtgttaatagtagacggtcttgcggttaaacagtgtcgtaataatgagaaaaaggctgtgtgggaagaagctaagctc…	MNAFGRLIFFLIVGVLAGCANKPAHNEPVVQYTVTQHDQGAFPSQSMHGRVLFLQCPGGYEFPAYIQKDTAWLFLPEGTKRLVSGKSTGGDHYSNGEYSFLVGKDDAVLIVDGLAVKQCRNNEKKAVWEEAKLRGADFRAVGIKGEWSLELSLEGNTVFIGDQGNTRILFKTPDPIIDREKMTSTYNMNNGEHHLVVKIEGKSCHDPISGQLFDTSVTLHLDKQVLKGCGRAFKPF
577	MAG14_133	MAG14_133_577	116	2	0	2	2	2	3	0	6	0	0	0	0	0	2	0	19	hypothetical protein	gtgccggtaattctcatcttttataataccaaaatagccctgctattactcgtcattccgccttgttctgaaatctggacgcctatgctcattacggtaattagaaagcgcgattga	MPVILIFYNTKIALLLLVIPPCSEIWTPMLITVIRKRD
578	MAG14_133	MAG14_133_578	128	0	0	3	0	3	6	4	4	0	0	0	0	0	1	0	21	hypothetical protein	atgcctatttatataagctcacactatacttttaactatatatcaatctttgcactgataaatacacccaatgcccttaaatgtgccgatgaaggtattctcgatgctagactaaccaagatggactag	MPIYISSHYTFNYISIFALINTPNALKCADEGILDARLTKMD
579	MAG14_134	MAG14_134_579	5324	12	6	11	8	14	22	14	31	18	0	0	0	4	2	0	142	DNA helicase related protein	gtcattgatgaattgcccaatcaactccatgaagaattgcttaatggcaagactatggcgtttcaagcggtaccagaaccttcaaaagaagaacttatagacgctgggtatcttcaggtagatccagaaacgggtgatgtgaagcacctgaaagctgaccctaaagccctagagtgggctaagcagcttggccttgcaacagattattcactgcctaagcatgatggcggcaagcccgctggtaagcatattgatgatcagatacagacacttctctacccctatgagatggaaaatattcttcggaatatttcaagcaagtcgaagacggctattgaggagtcaggtgccaatattctctatttagctttgggttttctagagtggtatgaaagaagt…	VIDELPNQLHEELLNGKTMAFQAVPEPSKEELIDAGYLQVDPETGDVKHLKADPKALEWAKQLGLATDYSLPKHDGGKPAGKHIDDQIQTLLYPYEMENILRNISSKSKTAIEESGANILYLALGFLEWYERSDSSETHLAPLYLIPVRIDKGKLDSLTNTYSYRLSYTEEDIVSNLSLREKLRNDFNLALPELSADQTPEQYLASIERSILKAQPNWKVRRFASLGMLNFGKLLMYLDLDPTRWPNGDGNISNHEVVKEFFGTESRDAQGSSFQVEYDIDNLNQIHEDFPLIDNADSSQHSALIDVIKGKNTVIEGPPGTGKSQTITNIIAAAIAQGKKVLFVAEKMAALNVVKHRLDKAGLGGFCLELHSHKTNKRKLLDSISESFKFRDNCRAPEA…
580	MAG14_134	MAG14_134_580	2042	8	4	36	3	19	12	30	50	20	0	0	0	2	0	0	184	Soluble lytic murein transglycosylase (EC 4.2.2.n1)	atgtcggttatgagccagataaagcaaaagataattgccttcactgtcgcctctacggtattacctgcggtggtttatgctgcagatgaggataaactaagctcacagcgcaaattattcgttaccattgaaaaacagcttcaaaagaaaaaaaatcgtctctttacggacagtttgacacaacttaaagactacccgctgctgccttatctacattcccttgatctaatcaatagattaaaccagttagatcaaaaagatattgacagctttgctatgagctggccatcagccccctcaggacagcgtttacaacagcagtggttaagcagtttagcaacgaaaaaacgctgggccgattaccttattgcctacgagcgaagtgatgtttaccatgta…	MSVMSQIKQKIIAFTVASTVLPAVVYAADEDKLSSQRKLFVTIEKQLQKKKNRLFTDSLTQLKDYPLLPYLHSLDLINRLNQLDQKDIDSFAMSWPSAPSGQRLQQQWLSSLATKKRWADYLIAYERSDVYHVKYQCLNGVANYKEGNYQAAWSAAVRLWLVGKSQNKACDPLFVAWKKNGGLTQSLAFDRFWLAAENGSIQLAKYIDNFITDKSLKKQTSLFLKVHHTPSQLYKKTLLDKNKQRHRFIYLNGLARLTHQKEEQAITLWLKDRDRYPFTMNEIAMVDRKLALRLAKRLDAKNAAIIAKLDPLFSYPKVTEWRIRLALIEQDWASVLALISELPEEYIEKNRWKYWQAVATIARQSEQGILEDDATILKRNVFTDISKERDFYGFLVADI…
581	MAG14_134	MAG14_134_581	1139	0	0	3	4	0	5	0	4	0	0	0	0	2	0	0	18	hypothetical protein	atgcatatttgtgataaatacaggagcgctcaggcatgtctatggttcactatttttttttcacatgcagcatatagttcacactggattatttctgaacctacttctattacatcaactaatctattaaaaaaagagtcacttatttcacgaaattacctgcctcagaaaaatatagaccaaaaaaaaaccttatttacattaactacaaataataaagttaaccaaaccggaattaataccggagacatcaatgatccatttgaactctttgaagatgctgatgattattatgcctttatagacgaattaaaaaacataacgggttgggttaaacttaaatatgacaaaggtgaccataatcaaattgaatctgcgaaaggattttctacagaaacg…	MHICDKYRSAQACLWFTIFFSHAAYSSHWIISEPTSITSTNLLKKESLISRNYLPQKNIDQKKTLFTLTTNNKVNQTGINTGDINDPFELFEDADDYYAFIDELKNITGWVKLKYDKGDHNQIESAKGFSTETHGFSIGANSELSLKTKIGVAFTYDKTKNEGSDKEKLLLSSMLSSFYTLWSDRKYFFDTEFSLGFSNANRDRSISNMLYKNKFDINTVSVSITSGKHFKHRGWNIDPNIVLNYALASFNNYTETSTAGKKSNVTLKDIKTIEIGSGIKIGRSYWGRTLVRRGHYKPELSLTAYYDARQDISTISARIPISRDGFIITGPKKDRFRLEGKMGLTLTRYKRFTFNVSYRFNKSANYFAHGASADFRYPF
582	MAG14_134	MAG14_134_582	194	0	0	3	2	0	0	0	0	0	0	0	0	0	0	0	5	hypothetical protein	atgattcttcaggcgttttaccaatcagcattagggcagcagctgtatataacagtagaagaattgcagaatgatctggacgaatggcttatttactataatactcatccaactcatcaagggaaacaatgccttagcaggcatcaatggaaatattgcttgatggcaaaagtatctgaaaggaaaaattcctag	MILQAFYQSALGQQLYITVEELQNDLDEWLIYYNTHPTHQGKQCLSRHQWKYCLMAKVSERKNS
583	MAG14_134	MAG14_134_583	1409	14	41	131	40	34	102	61	126	75	0	0	0	6	32	0	662	Sodium:alanine symporter family protein	atgattcatataattgatgcgatcaacaacctcatatggggtaatgtattaatttacctgttaatcggttccggtttattttttaccctgagaacccaatttgtgcagcttaggcgattcccccaagcctttagaattatgctgaatagccggcagcgcaagagtgaaacccatatatcgccttttcaggcattttgcaccagtttggctgccagaatcggtactggcaatatagccggcgttgccattgcaatttatctcggtggccccggggctgtattctggatgtggattattgcactatttggcatggcaaccagtgtggctgaaaacacacttgcccaattgtataaaaccaataatcatgacggtaccttccgtggtgggcctgcatattat…	MIHIIDAINNLIWGNVLIYLLIGSGLFFTLRTQFVQLRRFPQAFRIMLNSRQRKSETHISPFQAFCTSLAARIGTGNIAGVAIAIYLGGPGAVFWMWIIALFGMATSVAENTLAQLYKTNNHDGTFRGGPAYYIEKAMKMRWLGIMFSIAMIIAYGFAFNSVQANSIALAFKHYGIPNYWIGTILVGVSSLIIFGGIRSISRVAEMIVPVMAIGYMIVALMVVALHITELPAMLTLIVKSAFGLKTAASGGAGYMISQAMMQGVKRGLFSNEAGIGSAPNAAATAHSMHPGNQGMFGMLGVFMDTIIVCTSTAVIILMSGVLVPGNGVTGVQLTQAAMTSEVGVWGEHLVALAILLFAFTSIIANYYYGESSLRFISDNKKLVSVFRLLVLGMIFWGAE…
584	MAG14_134	MAG14_134_584	1343	14	8	27	5	16	14	18	30	22	0	0	0	0	6	0	164	diguanylate cyclase/phosphodiesterase (GGDEF & EAL domains) with PAS/PAC sensor(s)	atggatgaggcgggtaaagccaaaattttagtggtcgatgaccgaccagaaaatttattggctatggataaactattaaagcctcttggtgcaaatattcataaggcaagctcaggtgaggaggcgctatcagaagtactgagtcatcgttttgccgttattttgttggatgtgcaaatgcctggtatggatgggtttgaagttgctacattgttacacagtaataagcaaacagaaagcatacctattatttttgttactgctattaataaagatcagagttatattagtaaagggtatcaagcgggagcagttgattacctacccaaacctattaatcctgatgttttgattggtaaggttaaagtttttttaatattagaagagcagcgacaagcg…	MDEAGKAKILVVDDRPENLLAMDKLLKPLGANIHKASSGEEALSEVLSHRFAVILLDVQMPGMDGFEVATLLHSNKQTESIPIIFVTAINKDQSYISKGYQAGAVDYLPKPINPDVLIGKVKVFLILEEQRQALEEVSKELRWISKKNQLLLDCVDEGIVGLDAEGHITFTNPVASQYLDGGEGNLLGEHISQFLFEGDKTTVLDAWNTSELKEGCMIKGNTIRQSHIIYRKNKGRFPSEYSLAALLDDRQKVSGAVLLFRDITTRKKLEDELIRMAKYDSLTGLANRVLFREFILASMARSHRRKKHTVVMFLDLDHFKAINDTLGHDVGDQLLISVAKRLQTCVRDGDMIARLGGDEFAVILDDVAERRDATIVAEKIVKAIKAPYKLAGEDHFVGA…
585	MAG14_134	MAG14_134_585	824	1	1	3	0	0	3	0	3	2	0	0	0	0	0	0	13	MCP methyltransferase, CheR-type	atgacaaattttgacaaagagcaattagagttgtcattactgttaatggctgctgagaactgttatggctatgattttcataactatgcaaaagcctctttgttacgccgagttaagaaatacttggatttaagcactaaagagcatattagcgatttaattccactgtttatccatgacaaaaaaaatttctctgagtttgttcagcagttatctgtttctgttactgaaatgtttcgagatccagacttctttagtgctattcgatctcaagtattgcctttattaaaaacctacccctttataaaaatatggcatgcaggctgtgcaacaggagaagaagtttactctatggcaattattttggaagaagcgggtttattagataggtgtcagatt…	MTNFDKEQLELSLLLMAAENCYGYDFHNYAKASLLRRVKKYLDLSTKEHISDLIPLFIHDKKNFSEFVQQLSVSVTEMFRDPDFFSAIRSQVLPLLKTYPFIKIWHAGCATGEEVYSMAIILEEAGLLDRCQIYATDFNEFSLNTARKAIYPSKNIPLYEENYKLSGGIGELSDYYHKMYESIKFNDRLSERITFANHNLVADGIFGEMNIIFCRNVLIYFNQTLQDQVLHMFFDSLCPFGILCIGKRENLQFSRVSNSFEQVNRKQRIYKKKC
586	MAG14_134	MAG14_134_586	4139	0	0	7	4	10	19	10	12	4	0	0	0	0	0	0	66	Two-component system sensor histidine kinase	atggataatggtgtgttaaattcgcctaaaaaaaaatggcgtaataagctatcaacaacgttatttttttggtttatgttgctatcgttagggcctgtaatagtaataggtacgtttgaatatcaaacaggcaagaagaatattattgatggccattataaaacattgtcaacaactaatttattatttagtgaacagttaaatgatttctttgattcattggtaactaatctatttattaaatcttggactgcacaggagtttattgaaagtttagtaagatcgctcaatgatggagagttaaaagtagaagagtacattaaaacaaaagagtataagttgattgtagataaatacactgatgagtttattgattttgttgataataatgggttttct…	MDNGVLNSPKKKWRNKLSTTLFFWFMLLSLGPVIVIGTFEYQTGKKNIIDGHYKTLSTTNLLFSEQLNDFFDSLVTNLFIKSWTAQEFIESLVRSLNDGELKVEEYIKTKEYKLIVDKYTDEFIDFVDNNGFSNLIIGDDQGNILYTANQSNHIGKNLFTGSLKITELSKSAKVSMANYKPSYAAIDSYMKADNESVSFFIMPLINDYDVVSGFIAVQIFANKIQELFLRQGEILGNSANSYLINLDGKIVFGTTYSPELNLVVDRDNPLFKLWLSNVDPVTGNYIKNNNKSATENKDITLEENNNKNKLTQIYSNVRNYKNLDVQDVMGIYYPVSVGATPMAMISEVAHDQAFSSLYEFRNRLLWMSGTILLTVILFAILITRKLVKPINTITSWVKR…
587	MAG14_134	MAG14_134_587	122	0	0	2	0	0	0	0	1	0	0	0	0	0	0	0	3	hypothetical protein	atggatatcaatcataaagataagcttacaataactgaatcattcgctctgattttttcatttggaacactgctaacagcaatgagtacattaaccttgattattatctcatgtgttcaatga	MDINHKDKLTITESFALIFSFGTLLTAMSTLTLIIISCVQ
588	MAG14_134	MAG14_134_588	674	16	6	31	4	12	29	28	43	6	0	0	0	4	14	0	193	Ribose-5-phosphate isomerase A (EC 5.3.1.6)	gtgaatcaaaatgagcttaaaaaggcgactgcagaagccgctctggcaagaattgttcctcagttagaaaaaaatatggtaatcggtattggaacaggttctacagccaacttttttattgacgctcttgctgcgtataagaatgattttgatggttgtgtagccagttctgaggcgtcggcaaaccgcctgaaaaagcatggattacctgtatacaacttaaactcagttaatagattacagttttatattgatggtgcagatgaagcaaatgagcatttgcagctgattaagggcggcggggctgccctcacacgagaaaaaattgtagcggcagttgctgaagagtttatttgtattgtggatgagagcaaatctgtgcctgttttgggccggttt…	MNQNELKKATAEAALARIVPQLEKNMVIGIGTGSTANFFIDALAAYKNDFDGCVASSEASANRLKKHGLPVYNLNSVNRLQFYIDGADEANEHLQLIKGGGAALTREKIVAAVAEEFICIVDESKSVPVLGRFPLPVEVIPMARSHVARELVKIGGDPAYREGIVTDNGNYILDVWNMSIVDPIALETKINQITGVVANGIFALRPADVMLLGTKEGVKIIKPD
589	MAG14_134	MAG14_134_589	1346	4	6	35	0	6	8	5	24	14	0	0	0	2	3	0	108	hypothetical protein	atgatcaataatctgtctactacgcccccagccacccccagtctaaataaaggtgcaaggcctaaaaatcttcagaaaattgctcgccaagagacggaaaagaaaatgcatggtgctactagccatacagatactgaatacccatgctcatcttcccagaagccagaaatctcaattaaagctagagcctcaaaggcgactaataaaggagttatcactcgcgaggagttatatcaagagattattaagctagcaggtattcctgactcaagacttccaagaaattacccaaaaaaacatgccactgacctcatccaattcatcccttataacaggtcgcttattgataagctctatgaaaaattagtagcttttcgtcgccaagcaagattagcagac…	MINNLSTTPPATPSLNKGARPKNLQKIARQETEKKMHGATSHTDTEYPCSSSQKPEISIKARASKATNKGVITREELYQEIIKLAGIPDSRLPRNYPKKHATDLIQFIPYNRSLIDKLYEKLVAFRRQARLADLPDTNYGLKAPIEQLVTSIFPELSWISFDRLIPYRCIFEDDDIVKVHQPVRTEELKNTLVTYTTNNRPIISDDDTVKVHQPLRKEEVKNTLVTYTANNRPIISQASEHGAYDAILNMILHENGLDIKPLRVACEPQYPEYPIRLEHYRHKSMENVINALKQEKFMLTQQRWPSKTSILQKLDRRLQRHGSASNLENHIKTKGLNDVLDVMIEDLGAKTIKQNTMKKTLDFLSRLSEDIKKHGSVIASVYHGPMIIDAITPETVRVR…
590	MAG14_134	MAG14_134_590	314	0	4	4	4	0	6	2	12	2	0	0	0	0	0	0	34	DNA base-flipping protein	ttgtcatctgatatcgacccaaagcgcatatggtatattcttagccaagtacctaaaggcaaagtgataacctatggccaactagctgaaatggcaggtgcaaaacaagctgcccgtgttgttggtaacatattaaaacaattaccaataaatactaacttgccctggcatagagtcattaaccataaaggccagctttcttttccagaagatacgttacggtatcaaaaacaaaaagataggctagaagcagaaggagttattctgctttcaggaaagctagatcttaaacattaccgctggaatggggaataa	MSSDIDPKRIWYILSQVPKGKVITYGQLAEMAGAKQAARVVGNILKQLPINTNLPWHRVINHKGQLSFPEDTLRYQKQKDRLEAEGVILLSGKLDLKHYRWNGE
591	MAG14_134	MAG14_134_591	206	2	2	0	2	5	3	1	7	9	0	0	0	0	0	0	31	hypothetical protein	atggataatagacctgaagacataaccctagcaatagaagtcattcgccagctagaaaatcttgactatcctaaggaaagcattcttcaggcaatgatttatatctgtcaagacacattaaataaactacccgatgaagatagtagagaaaattggcgtaataaaataacgctagcactcgctcatacatcatcgaacactcattaa	MDNRPEDITLAIEVIRQLENLDYPKESILQAMIYICQDTLNKLPDEDSRENWRNKITLALAHTSSNTH
592	MAG14_134	MAG14_134_592	1394	4	4	24	4	6	15	33	38	21	0	0	0	0	2	0	152	AmpG permease	atgactataaaaaaagtgcacaagtggtggcaggctattcatgtttaccggcaccctaaagcggttacgctctttttcctaggtttttcatcaggcctgccgttgatgttattattttccagcctttctttctggctaagagaggctgaggtcagtagggcaacaataggtttttttagctggattggtcttgcctatagcattaaatggctatggtcgcctttagtcgataaattacctatacccatagttacatcactactaggccgacgtcgctcatggttgctaataagccaactgggtgttatggcaggcttattaggcatcgcgtttactgatccatctaataaccttgaaagaatggccctgctagcgattatggtggcttttttttccgca…	MTIKKVHKWWQAIHVYRHPKAVTLFFLGFSSGLPLMLLFSSLSFWLREAEVSRATIGFFSWIGLAYSIKWLWSPLVDKLPIPIVTSLLGRRRSWLLISQLGVMAGLLGIAFTDPSNNLERMALLAIMVAFFSATQDIVIDAYRIDAAEGKLQAALAATYMMGYRIAMIIAGAGTLAIAGFVAGSTIGYVPYAWMVSYICMAGLMGVGLLTTLLIAEPKAPEQFTQLEQRAIDWMDQHAHLPTPLIKFFGWFYSTVVCPFADFIVRYRWHAVLILALISTYRISDIVLGIMANPFYVDLGFTKEEVAAVSKIYGVIMTLTGASIGGLMTVRFGVMRILFIGGLLSSLTNLLFAAMAHAGHNIFWLTAVISMDNLASGIATAAFIAWLSSLTNISYSATQY…
593	MAG14_134	MAG14_134_593	695	8	10	26	10	10	39	17	53	15	0	0	0	0	8	2	198	tRNA (guanine(46)-N(7))-methyltransferase (EC 2.1.1.33)	atgaatgatattgtggataatcactacaaaataaaaagtttcgttttaagacaaggtcgcatgaccaaaggtcaacagcgtggctgggatgaatgctgggataagtgggggctgacgttagaagcgggtaggctggatatggtgaatacctttaaacgcagcgcaccggttgttttggagattggctatggtatggggctgtctttaatagaaatggctaaggctgaacctgcgtatgattttatcggcattgaagttcatcgacctggtgttggtagtttattaaatgaggccaatacggctgaagtgactaatatccgaacctataataatgatgctgtggacgtattaagccaatgtatcccagacaacagcctgacacggatacagatttacttt…	MNDIVDNHYKIKSFVLRQGRMTKGQQRGWDECWDKWGLTLEAGRLDMVNTFKRSAPVVLEIGYGMGLSLIEMAKAEPAYDFIGIEVHRPGVGSLLNEANTAEVTNIRTYNNDAVDVLSQCIPDNSLTRIQIYFPDPWHKKRHNKRRLIQPDFITTLRPKLVPSGVIHLATDWEHYADQMMKVMSVAEGFNNLAGEYTFSERPTYRPLTKFEKRGQHLGHGVWDLLFEKIAY
594	MAG14_134	MAG14_134_594	398	0	1	12	6	2	20	2	12	5	0	0	0	0	8	0	68	FIG00018398: hypothetical regulator	atgacaacaaacaactacctgattttcggggcaggctctggaggtttagctgtcggtttcggtgcgtttggtgctcatgccttaaagcacatgctctcagcacagttgttggatgtataccatgtagcgactaactatcaaatgtatcatagtttagcattgatattggttgcagtattactttcgcaacacactagcgctaaggcgctaaagtggagcgctcgtttttttctcttaggcattattttgttttccggaagcttatatctacttgctctaaccggagtgcgttggctgggcataataacacccattggtggtgtttcctttatattgggctggttaatgctgacttactttgcaattagctattcagatagccaatcggtaaatcaatga	MTTNNYLIFGAGSGGLAVGFGAFGAHALKHMLSAQLLDVYHVATNYQMYHSLALILVAVLLSQHTSAKALKWSARFFLLGIILFSGSLYLLALTGVRWLGIITPIGGVSFILGWLMLTYFAISYSDSQSVNQ
595	MAG14_134	MAG14_134_595	1235	13	2	13	11	10	12	12	29	6	0	0	0	1	2	0	111	Uncharacterized protein EC-HemY in Proteobacteria (unrelated to HemY-type PPO in GramPositives)	atgaaaaaatttttcatttttttactcgtgctagctagtgtctttttgctagctaatgcaatggttgatgatcgtggctacgtgctgattgcctatgatggcatgagttttgagagcagcttatgggggtttttacttttagtagtgattagcatagcgttaacatatagcgtgaccctattatttagaatatttgggcgggcaagctctatcatttaccctgtaacacccacagctcgtataaagcgcgcgcgtcgtttctcgcagaaaggactgtctgaatttaccaatggtaattggaagaaagctgagaaactgttagcgcaggcagcagaaaatggtgaatctcccttaattaattatctgacggctgctagagcagctcatgaaagtggtaat…	MKKFFIFLLVLASVFLLANAMVDDRGYVLIAYDGMSFESSLWGFLLLVVISIALTYSVTLLFRIFGRASSIIYPVTPTARIKRARRFSQKGLSEFTNGNWKKAEKLLAQAAENGESPLINYLTAARAAHESGNDEASTEYLRHADEQAPGAEIAVGITQAQLQLSGGQLEQALATLTNLHKKKPHHTYILKLLKKVYVRLNDWQSVAKLLPQLKKYKVIDEIKYRRLEKQVFETLFEQAYRQGKSQSTFEKKVQPASKIWNSLSYQQRRNTLMLFRYTQTLVKLGAEKKAERLLRENLKKHYSNELIRLYGQIKGKDINKQLLTAEALLTQRTNDPELLLTLGRLAIRNKLWGKAKEYFEASLRLRKCIDVYNELGRLLAHLDHHEQSSRYFREGLNQA…
[truncated: 2,066 more rows]

## Sheet: Supplementary Table 2
Supplementary Table 2: Relative abundance (%) of top 20 bacteria (classified using the best blast hit) in different tissue along different stage. Blue color –lower percentages, red color –highest percentages.
